# Supplementary material for: Isomerization of Olefins Triggered by Rhodium-Catalyzed C–H Bond Activation: Control of Endocyclic β-Hydrogen Elimination
Source: PubMed Central journal article supplement (PMC4497606; doi:10.1002/anie.201500596), 2015-04-23

Supporting Information

German Edition: DOI:

**Isomerization of Olefins Triggered by Rhodium-Catalyzed C–H Bond  
Activation: Control of Endocyclic  $\beta$ -Hydrogen Elimination\*\***

*Stephanie Y. Y. Yip and Christophe Aïssa\**

anie\_201500596\_sm\_miscellaneous\_information.pdf

**General.** Otherwise noted, all reactions were carried out in flame-dried glassware under dry nitrogen atmosphere. THF and Et<sub>2</sub>O were purchased dried from Acros. CH<sub>2</sub>Cl<sub>2</sub> was dried over 4Å molecular sieves. Dry acetone was purchased from VWR. Flash chromatography: Merck silica gel 60 (230-400 mesh). NMR: Spectra were recorded on a Bruker DRX 500 in CDCl<sub>3</sub>; chemical shifts ( $\delta$ ) are given in ppm. The solvent signals were used as references and the chemical shifts converted to the TMS scale (CDCl<sub>3</sub>:  $\delta_C$  = 77.0 ppm; residual CHCl<sub>3</sub> in CDCl<sub>3</sub>:  $\delta_H$  = 7.26 ppm); apparent splitting patterns are designated using the following abbreviations: s (singlet), d (doublet), t (triplet), q (quartet), quint. (quintuplet), m (multiplet), br (broad), and the appropriate combinations. In <sup>13</sup>C NMR, an APT sequence was used to separate methylene groups and quaternary carbons (e, even) from methine and methyl groups (o, odd). IR: PerkinElmer Spectrum 100 FT-IR spectrometer, wavenumbers ( $\tilde{\nu}$ ) in cm<sup>-1</sup>. HRMS determined at the University of Liverpool on micromass LCT mass spectrometer (ES+) and Trio-1000 or Agilent QTOF 7200 mass spectrometers (CI). Melting points: Griffin melting point apparatus (not corrected). Elemental analyses: University of Liverpool. X-Ray crystallography: Bruker D8 Venture Photon 100 Dual Microsource diffractometer. Optical rotations were measured on a PerkinElmer Model 343 plus polarimeter with a sodium lamp (D line, 589 nm) at ambient temperature (indicated in °C as superscript) using a 1 mL quartz cell of 100 mm length; solution concentration (c) are given in g/100 mL. All commercially available compounds were used as received.

|                                                                                                                                                                                                                    |      |
|--------------------------------------------------------------------------------------------------------------------------------------------------------------------------------------------------------------------|------|
| Preparation of compounds <b>1, 3, 4, 7, and 9a–9o</b>                                                                                                                                                              | S2   |
| Preparation of compounds <b>11, 13, 15 and 18</b>                                                                                                                                                                  | S25  |
| Preparation of compound <b>cis-10a</b>                                                                                                                                                                             | S28  |
| Preparation of [Rh(nbd)(DTBM-Segphos)]                                                                                                                                                                             | S31  |
| Representative procedure for Rh-catalysed isomerization                                                                                                                                                            | S32  |
| Analytical data for compounds <b>2, 5, 6, 8, and 10a–10o</b>                                                                                                                                                       | S33  |
| Analytical data for compounds <b>12 and 14</b>                                                                                                                                                                     | S37  |
| Preparation of compound <b>17</b> and isolation of transient intermediate <b>16</b>                                                                                                                                | S38  |
| Supplementary examples of isomerization/hydroacylation tandem                                                                                                                                                      | S39  |
| Preparation of compounds ( <b>±</b> )- <b>19</b> , ( <b>R</b> )- <b>19</b> , ( <b>±</b> )- <b>20</b> , ( <b>S,S</b> )- <b>20</b> , ( <b>S</b> )- <b>21</b> , ( <b>R</b> )- <b>22</b> , and ( <b>S</b> )- <b>23</b> | S41  |
| Calculation of e.e. of ( <b>S,S</b> )- <b>20</b> and determination of its absolute configuration                                                                                                                   | S43  |
| Kinetic resolution of ( <b>±</b> )- <b>16</b>                                                                                                                                                                      | S44  |
| NMR spectra for compounds <b>1, 3, 4, 7, and 9a–9o</b>                                                                                                                                                             | S45  |
| NMR spectra for compounds <b>11, 13, 15 and 18</b>                                                                                                                                                                 | S83  |
| NMR spectra for compounds <b>2, 5, 6, 8, and 10a–10o</b>                                                                                                                                                           | S93  |
| NMR spectra for compounds <b>12, 14, 16, 17, 19–23</b>                                                                                                                                                             | S135 |
| HPLC traces for compounds <b>19</b> and <b>22</b>                                                                                                                                                                  | S166 |
| HPLC traces for compounds <b>17</b> and <b>SI-3</b>                                                                                                                                                                | S170 |
| Crystal data and structure refinement for ( <b>S</b> )- <b>23</b>                                                                                                                                                  | S178 |

## Preparation of compounds **1**, **3**, **4**, **7**, and **9a–9o**<sup>1</sup>

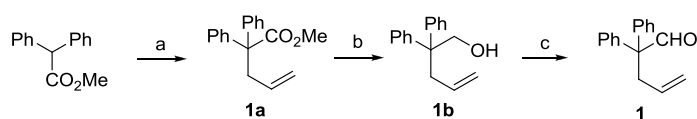

<sup>(a)</sup> i) LDA, THF,  $-78\text{ }^{\circ}\text{C}$ ; ii) allyl bromide,  $n\text{Bu}_4\text{NI}$ ,  $-78\text{ }^{\circ}\text{C}$  to rt, 99%. <sup>(b)</sup>  $\text{LiAlH}_4$ ,  $\text{Et}_2\text{O}$ , 90%. <sup>(c)</sup>  $(\text{COCl})_2$ , DMSO,  $\text{Et}_3\text{N}$ ,  $\text{CH}_2\text{Cl}_2$ , 81%.

**Compound 1a.** Under  $\text{N}_2$  atmosphere, di-isopropylamine (7.29 mmol, 1.03 mL) was dissolved in THF (22 mL) and cooled to  $0\text{ }^{\circ}\text{C}$ .  $n\text{Butyllithium}$  (7.29 mmol, 2.92 mL, 2.5M in hexanes) was added and stirred for 15 minutes at  $0\text{ }^{\circ}\text{C}$  before cooling to  $-78\text{ }^{\circ}\text{C}$  and adding diphenyl methyl acetate (6.63 mmol, 1.5 g), stirring for 30 minutes at  $-78\text{ }^{\circ}\text{C}$ . Then, allyl bromide (7.29 mmol, 631  $\mu\text{L}$ ) and tetrabutylammonium iodide (1.33 mmol, 490 mg) were added and the reaction mixture was warmed to room temperature and stirred for 16 hours. The reaction mixture was cooled to  $0\text{ }^{\circ}\text{C}$ , quenched carefully with a saturated aqueous solution of ammonium chloride and the aqueous layer was extracted with  $\text{Et}_2\text{O}$ . The organic phase was dried over  $\text{MgSO}_4$  and the solvent removed under reduced pressure. Purification by flash column chromatography (petroleum ether/ $\text{Et}_2\text{O}$  = 50:1) afforded **1a** (1.74 g, 99%) as a colourless oil.  $^1\text{H}$  NMR (500 MHz,  $\text{CDCl}_3$ ):  $\delta$  = 7.33-7.22 (m, 10H), 5.59 (ddt,  $J$  = 17.6, 9.7, 7.0 Hz, 1H), 4.97-4.90 (m, 2H), 3.70 (s, 3H), 3.17 (dt,  $J$  = 1.2 Hz, 2H), in agreement with previously reported data.<sup>2</sup>

**Compound 1b.** A solution of **1a** (5.63 mmol, 1.5 g) in  $\text{Et}_2\text{O}$  (12 mL) was added under  $\text{N}_2$  to a suspension of  $\text{LiAlH}_4$  (3.10 mmol, 133 mg) in  $\text{Et}_2\text{O}$  (26 mL) at  $0\text{ }^{\circ}\text{C}$ . After stirring at room temperature for 30 minutes, another portion of  $\text{LiAlH}_4$  (3.10 mmol, 133 mg) was added. After stirring for 30 minutes, the reaction mixture was quenched carefully at  $0\text{ }^{\circ}\text{C}$  with a saturated aqueous solution of sodium sulfate. The white precipitate was filtered over celite pad, the filtrate was evaporated under reduced pressure and the crude material was purified by flash chromatography (petroleum ether/ $\text{Et}_2\text{O}$  = 10:1) to afford **1b** as colourless oil (1.20 g, 90%).  $^1\text{H}$  NMR (500 MHz,  $\text{CDCl}_3$ ):  $\delta$  = 7.33-7.28 (m, 4H), 7.25-7.17 (m, 6H), 5.43 (ddt,  $J$  = 17.2, 10.1, 7.1 Hz, 1H), 5.13-5.07 (m, 1H), 5.02-4.97 (m, 1H), 4.16 (d,  $J$  = 6.8 Hz, 2H), 2.97 (d,  $J$  = 7.2 Hz, 2H), 1.14 (t,  $J$  = 6.9 Hz, 1H (OH)), in agreement with previously reported data.<sup>3</sup>

**Compound 1.** Under  $\text{N}_2$ , DMSO (6.05 mmol, 429  $\mu\text{L}$ ) in  $\text{CH}_2\text{Cl}_2$  (1 mL) was added to a solution of oxalyl chloride (3.02 mmol, 259  $\mu\text{L}$ ) in  $\text{CH}_2\text{Cl}_2$  (20 mL) at  $-78\text{ }^{\circ}\text{C}$ . After 10 minutes stirring at  $-78\text{ }^{\circ}\text{C}$ , a solution of the **1b** (2.52 mmol) in  $\text{CH}_2\text{Cl}_2$  (4 mL) was added. After 20 minutes stirring at  $-78\text{ }^{\circ}\text{C}$ , triethylamine (12.6 mmol, 1.76 mL) was added and the mixture was stirred at room temperature during 20 minutes. A saturated solution of ammonium chloride was added to the reaction mixture which was then extracted three times with diethyl ether. The organic layer was washed with water and brine, dried over  $\text{Na}_2\text{SO}_4$ , filtered, and concentrated. The crude mixture was purified by flash chromatography (petroleum ether/ $\text{Et}_2\text{O}$  = 50:1) to afford **1** as colourless oil (481 mg, 81%).  $^1\text{H}$  NMR (500 MHz,  $\text{CDCl}_3$ ):  $\delta$  = 9.83 (s, 1H), 7.39-7.34 (m, 4H), 7.33-7.27 (m, 2H), 7.21-7.17 (m, 4H), 5.58 (ddt,  $J$  = 17.2, 10.1, 7.0 Hz, 1H), 5.01-4.92 (m, 2H), 3.09 (d,  $J$  = 7.1 Hz, 1H);  $^{13}\text{C}$  NMR (125 MHz,  $\text{CDCl}_3$ ):  $\delta$  = 198.3 (o), 139.6 (e, 2C), 133.5 (o), 129.1 (o, 4C), 128.6 (o, 4C), 127.3 (o, 2C), 118.4 (e), 63.4 (e), 38.8 (e); IR (neat):  $\tilde{\nu}$  = 3060 (w), 3025 (w), 2917 (w), 2816 (w), 2716 (w), 1721 (s), 1640 (w), 1599 (w), 1493 (m), 1445 (m), 1389 (w), 1282 (w), 1189 (w), 1159 (w), 1097 (w), 1084 (w), 1033 (w), 998 (w), 953 (w), 916 (m), 870 (w),

<sup>1</sup> **9j** is a known compound, see: C. Aïssa, K. Y-T. Ho, D. J. Tetlow, M. Pin-Nó, *Angew. Chem. Int. Ed* **2014**, 53, 4209

<sup>2</sup> M. Mitsuno, M. Kadokena, Y. Watanabe, *J. Org. Chem.* **1987**, 52, 1695

<sup>3</sup> Y.-K. Jeong, D.-Y. Kim, Y.-S. Choi, J.-S. Ryu, *Org. Biomol. Chem.* **2011**, 374

846 (w), 755 (m), 697 (vs), 659 (w)  $\text{cm}^{-1}$ ; elemental analysis (%) calcd for  $\text{C}_{17}\text{H}_{16}\text{O}$ : C 86.40, H 6.82; found: C 85.95, H 6.74.

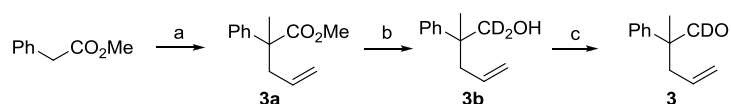

<sup>(a)</sup> i) LDA, THF,  $-78\text{ }^{\circ}\text{C}$ ; ii) allyl bromide,  $n\text{Bu}_4\text{NI}$ ,  $-78\text{ }^{\circ}\text{C}$  to rt, iii) LDA, THF,  $-78\text{ }^{\circ}\text{C}$ ; iv) MeI, 96%. <sup>(b)</sup>  $\text{LiAlD}_4$ ,  $\text{Et}_2\text{O}$ , 89%. <sup>(c)</sup>  $(\text{COCl})_2$ , DMSO,  $\text{Et}_3\text{N}$ ,  $\text{CH}_2\text{Cl}_2$ , 78%.

**Compound 3a.** Under  $\text{N}_2$  atmosphere, diisopropylamine (11.62 mmol, 1.6 mL) was dissolved in THF (32 mL) and cooled to  $0\text{ }^{\circ}\text{C}$ .  $n$ Butyllithium (11.62 mmol, 4.5 mL, 2.5M in hexanes) was added and the mixture was stirred for 15 minutes. The mixture was cooled to  $-78\text{ }^{\circ}\text{C}$  before adding the intermediate (9.68 mmol, 1.84 g) obtained from methyl phenyl acetate (9.99 mmol, 1.44 mL) using the allylation procedure described for the preparation of **1a**. After stirring for 30 minutes at  $-78\text{ }^{\circ}\text{C}$ , methyl iodide (15.48 mmol, 943  $\mu\text{L}$ ) was added and the reaction was left to stir over 48 hours at room temperature before quenching with a saturated aqueous solution of ammonium chloride and the aqueous layer was extracted with  $\text{Et}_2\text{O}$ . The organic phase was dried over  $\text{MgSO}_4$  and the solvent removed under reduced pressure. Purification by flash column chromatography (petroleum ether/ $\text{Et}_2\text{O}$  = 50:1) afforded **3a** as a colourless oil (1.97 g, 96% over two steps);  $^1\text{H}$  NMR (500 MHz,  $\text{CDCl}_3$ ):  $\delta$  = 7.36-7.28 (m, 4H), 7.26-7.21 (m, 1H), 5.61 (ddt,  $J$  = 17.1, 10.0, 7.2 Hz, 1H), 5.11-5.01 (m, 2H), 3.66 (s, 3H), 2.83 (dd,  $J$  = 13.7, 7.4 Hz, 1H), 2.66 (dd,  $J$  = 13.7, 7.1 Hz, 1H), 1.53 (s, 3H);  $^{13}\text{C}$  NMR (125 MHz,  $\text{CDCl}_3$ ):  $\delta$  = 176.2 (e), 143.3 (e), 134.0 (o), 128.3 (o, 2C), 126.7 (o), 125.9 (o, 2C), 118.3 (e), 52.0 (o), 49.9 (e), 43.7 (e), 22.6 (o); IR (neat)  $\tilde{\nu}$  = 3062 (w), 2979 (w), 2950 (w), 1728 (vs), 1640 (w), 1600 (w), 1583 (w), 1496 (m), 1459 (m), 1446 (m), 1433 (m), 1378 (w), 1317 (w), 1286 (w), 1272 (w), 1231 (m), 1142 (s), 1103 (m), 1072 (w), 1030 (w), 995 (m), 956 (w), 916 (m), 851 (w), 787 (w), 767 (m), 735 (m), 697 (s), 659 (w)  $\text{cm}^{-1}$ ; HRMS (CI( $\text{NH}_4$ )) calcd for ( $\text{C}_{13}\text{H}_{16}\text{O}_2 + \text{H}$ ): 205.1123; found: 205.1128.

**Compound 3b.** This compound was obtained from **3a** (1.96 mmol, 400 mg) following the same procedure as for the preparation of **1b** but using  $\text{LiAlD}_4$  (2.15 mmol, 90mg). Colourless oil (314 mg, 89%).  $^1\text{H}$  NMR (500 MHz,  $\text{CDCl}_3$ ):  $\delta$  = 7.39-7.33 (m, 4H), 7.25-7.21 (m, 1H), 5.60 (ddt,  $J$  = 17.0, 10.1, 7.26 Hz, 1H), 5.08-5.02 (m, 1H), 5.01-4.97 (m, 1H), 2.56 (dd,  $J$  = 13.9, 6.6 Hz, 1H), 2.36 (dd,  $J$  = 13.9, 7.9 Hz, 1H), 1.34 (s, 3H), 1.20 (br s, 1H (OH));  $^{13}\text{C}$  NMR (125 MHz,  $\text{CDCl}_3$ ):  $\delta$  = 144.6 (e), 134.4 (o), 128.2 (o, 2C), 126.6 (o, 2C), 126.0 (o), 117.3 (e), 70.7 (e,  $J$  = 22.1 Hz, quint.), 42.8 (e), 31.5 (e), 21.6 (o); IR (neat):  $\tilde{\nu}$  = 3377 (br), 3059 (w), 3023 (w), 2975 (w), 2913 (w), 2203 (w), 2086 (w), 1638 (w), 1601 (w), 1580 (w), 1496 (m), 1444 (m), 1415 (w), 1375 (w), 1289 (w), 1155 (w), 1098 (m), 1078 (w), 1048 (w), 1028 (m), 996 (w), 976 (m), 911 (s), 844 (w), 788 (w), 758 (m), 697 (vs), 664 (w)  $\text{cm}^{-1}$ ; HRMS (CI( $\text{NH}_4$ )) calcd for ( $\text{C}_{12}\text{H}_{14}\text{D}_2\text{O} + \text{NH}_4$ ): 196.1665; found: 196.1668.

**Compound 3.** This compound was obtained from **3b** (1.69 mmol, 300 mg) following the same procedure as for the preparation of **1**. Colourless oil (231 mg, 78%).  $^1\text{H}$  NMR (500 MHz,  $\text{CDCl}_3$ ):  $\delta$  = 7.42-7.36 (m, 2H), 7.32-7.23 (m, 3H), 5.55 (dddd,  $J$  = 17.2, 10.1, 7.3, 7.1 Hz, 1H), 5.06 (ddt,  $J$  = 16.8, 1.9, 1.4 Hz, 1H), 5.03 (ddt,  $J$  = 10.1, 2.0, 1.0 Hz, 1H), 2.70 (ddt,  $J$  = 14.1, 6.8, 1.2 Hz, 1H), 2.63 (ddt,  $J$  = 14.1, 7.7, 1.1 Hz, 1H), 1.45 (s, 3H);  $^{13}\text{C}$  NMR (125 MHz,  $\text{CDCl}_3$ ):  $\delta$  = 201.4 (e,  $J$  = 26.7 Hz, t), 139.4 (e), 133.1 (o), 128.9 (o, 2C), 127.2 (o), 127.0 (o, 2C), 118.4 (e), 53.3 (e,  $J$  = 3.3 Hz, t), 40.4 (e), 18.7 (o); IR (neat):  $\tilde{\nu}$  = 3077 (w), 3026 (w), 2978 (w), 2934 (w), 2103 (w), 2052 (w), 1713 (s), 1640 (m), 1599 (w), 1581 (w), 1494 (m), 1445 (m), 1417 (w), 1376 (w), 1271 (w), 1158 (w), 1077 (w), 1046 (w), 1028 (w), 995 (m), 955 (w), 917 (m), 848 (w), 803 (w), 755 (m), 729 (w), 697 (vs)  $\text{cm}^{-1}$ ; HRMS (CI( $\text{NH}_4$ )) calcd for ( $\text{C}_{12}\text{H}_{13}\text{DO} + \text{NH}_4$ ): 193.1446; found: 193.1448.

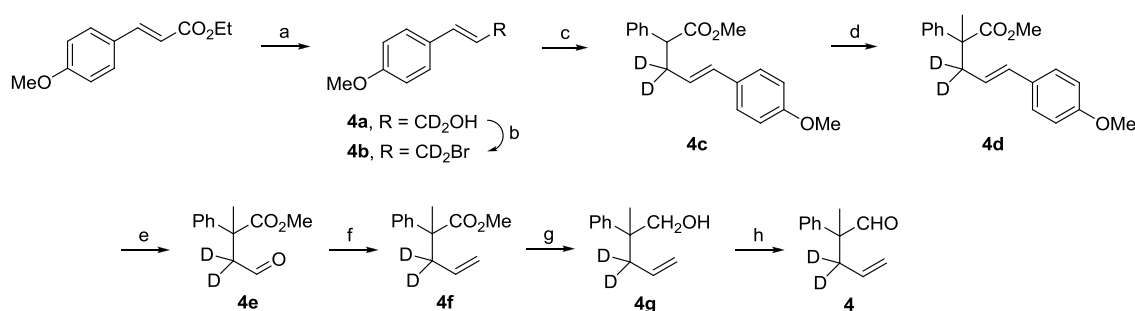

(a) LiAlD<sub>4</sub>, Et<sub>2</sub>O, 76%. (b) PBr<sub>3</sub>, Et<sub>2</sub>O. (c) i) LDA, THF, -78 °C; ii) **4b**, -78 °C to rt, 48% over two steps. (d) i) LDA, THF, -78 °C; ii) MeI, 94%. (e) i) O<sub>3</sub>, CH<sub>2</sub>Cl<sub>2</sub>; ii) PPh<sub>3</sub>. (f) i) Methyl-triphenylphosphonium bromide, nBuLi; ii) **4e**, 29% over two steps. (g) LiAlH<sub>4</sub>, Et<sub>2</sub>O, 85%. (h) (COCl)<sub>2</sub>, DMSO, Et<sub>3</sub>N, CH<sub>2</sub>Cl<sub>2</sub>, 82%.

**Compound 4a.** This compound was obtained from ethyl 4-methoxycinnamate (9.7 mmol, 2.0 g)

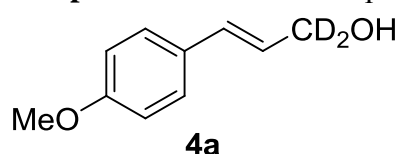

following the same procedure as for the preparation of **1b** but using LiAlD<sub>4</sub> (10.7 mmol, 450 mg). White solid (1.22 g, 76%). m.p.: 70–71 °C; <sup>1</sup>H NMR (500 MHz, CDCl<sub>3</sub>): δ = 7.36–7.30 (m, 2H), 6.89–6.83 (m, 2H), 6.56 (d, *J* = 15.9 Hz, 1H), 6.24 (d, *J* = 15.9 Hz, 1H), 3.81 (s, 3H), 1.35 (br s, 1H (OH)); IR (neat):  $\tilde{\nu}$  = 3356 (br), 3033 (w), 2970 (w), 2917 (w), 2843 (w), 2165 (w), 2194 (w), 2080 (w), 1651 (w), 1605 (m), 1510 (s), 1458 (m), 1443 (m), 1421 (m), 1306 (m), 1272 (s), 1242 (s), 1210 (m), 1190 (w), 1174 (s), 1144 (m), 1108 (w), 1075 (m), 1024 (s), 991 (w), 969 (s), 953 (s), 935 (m), 917 (w), 908 (w), 870 (w), 830 (s), 822 (vs), 772 (m), 743 (w), 734 (w), 693 (w) cm<sup>-1</sup>; elemental analysis (%) calcd for C<sub>10</sub>H<sub>10</sub>D<sub>2</sub>O<sub>2</sub>: C 72.26, H 7.28; found: C 71.94, H 7.28.

**Compound 4c.** Under N<sub>2</sub> atmosphere, **4a** (0.482 mmol, 80 mg) was dissolved in Et<sub>2</sub>O (4.8 mL) and the

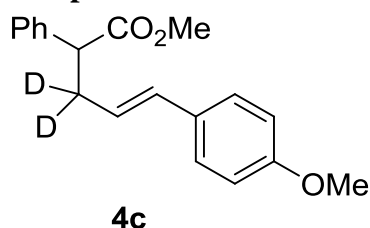

solution cooled to 0 °C. Phosphorus tribromide (0.241 mmol, 23 μL) was added and stirred to room temperature for 1 hour. The reaction was quenched with brine, extracted with Et<sub>2</sub>O (2 × 20 mL), and the organic layer dried over MgSO<sub>4</sub>, filtered and concentrated afforded **4b** as a white solid (88 mg, 80%), which was used directly in the next step without further purification. Under a N<sub>2</sub> atmosphere, diisopropylamine (0.383 mmol, 54 μL) was dissolved in THF (1 mL) and cooled to 0 °C. *n*Butyllithium (0.383 mmol, 153 μL, 2.5M in hexanes) was added and stirred for 15 minutes at 0 °C before cooling to -78 °C and adding methyl phenyl acetate (0.348 mmol, 50 μL), stirring for 30 minutes at -78 °C. At -78 °C, **4b** (0.383 mmol, 88 mg) was added and the reaction mixture was warmed to room temperature and stirred for 16 hours. The reaction mixture was cooled to 0 °C, diluted with Et<sub>2</sub>O and quenched carefully with brine. The organic phase was dried over MgSO<sub>4</sub> and the solvent removed under reduced pressure. Purification by flash column chromatography (petroleum ether/Et<sub>2</sub>O = 30:1) afforded **4c** as a white solid (61 mg, 59%). m.p.: 60–62 °C; <sup>1</sup>H NMR (500 MHz, CDCl<sub>3</sub>): δ = 7.38–7.19 (m, 7H), 6.84–6.78 (m, 2H), 6.38 (d, *J* = 15.8 Hz, 1H), 5.95 (d, *J* = 15.8 Hz, 1H), 3.79 (s, 3H), 3.68 (s, 1H), 3.66 (s, 3H); <sup>13</sup>C NMR (125 MHz, CDCl<sub>3</sub>): δ = 173.9 (e), 158.9 (e), 138.6 (e), 131.6 (o), 130.2 (e), 128.7 (o, 2C), 127.9 (o, 2C), 127.3 (o), 127.2 (o, 2C), 124.6 (o), 113.9 (o, 2C), 55.3 (o), 52.0 (o), 51.8 (o), 36.3 (e, *J* = 19.5 Hz, quint.); IR (neat):  $\tilde{\nu}$  = 2952 (w), 2840 (w), 1727 (vs), 1608 (m), 1578 (w), 1509 (s), 1454 (m), 1435 (m), 1335 (m), 1309 (w), 1277 (m), 1242 (vs), 1200 (s), 1172 (vs), 1152 (m), 1127 (m), 1108 (w), 1075 (w), 1032 (s), 987 (m), 966 (s), 867 (w), 826 (m), 808 (m), 766 (m), 740 (m), 729 (m), 699 (s) cm<sup>-1</sup>; HRMS (ESI) calcd for (C<sub>19</sub>H<sub>18</sub>D<sub>2</sub>O<sub>3</sub> + Na): 321.1436; found: 321.1429; elemental analysis (%) calcd for C<sub>19</sub>H<sub>18</sub>D<sub>2</sub>O<sub>3</sub>: C 76.48, H 6.76; found: C 75.99, H 6.78.

**Compound 4d.** Under N<sub>2</sub> atmosphere, diisopropylamine (1.24 mmol, 176 μL) was dissolved in THF (3.5 mL) and cooled to 0 °C. *n*Butyllithium (1.24 mmol, 498 μL, 2.5M in hexanes) was added and stirred for 15 minutes. Reaction was cooled to -78 °C before adding methyl **4c** (1.04 mmol, 300 mg) stirring for 30 minutes at -78 °C. Methyl iodide (1.66 mmol, 103 μL) was added at -78 °C and the reaction was left to stir for 90 minutes before quenching with a saturated aqueous solution of ammonium chloride. The aqueous layer was extracted twice with Et<sub>2</sub>O. The combined organic layers were

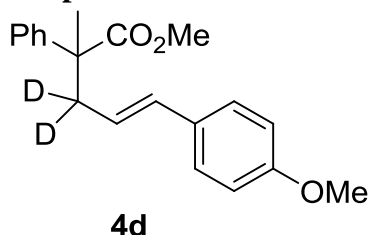

dried over MgSO<sub>4</sub> and the solvent removed under reduced pressure. Purification by flash column chromatography (petroleum ether/Et<sub>2</sub>O = 19:1) afforded **4d** as a white solid (295 mg, 94%). m.p.: 73–75 °C; <sup>1</sup>H NMR (500 MHz, CDCl<sub>3</sub>): δ = 7.38-7.31 (m, 4H), 7.29-7.19 (m, 3H), 6.84-6.79 (m, 2H), 6.35 (d, *J* = 15.8 Hz, 1H), 5.85 (d, *J* = 15.7 Hz, 1H), 3.79 (s, 3H), 3.67 (s, 3H), 1.57 (s, 3H); <sup>13</sup>C NMR (125 MHz, CDCl<sub>3</sub>): δ = 176.3 (e), 158.8 (e), 143.3 (e), 132.8 (o), 130.2 (e), 128.4 (o, 2C), 127.2 (o, 2C), 126.8 (o), 125.9 (o, 2C), 123.3 (o), 113.8 (o, 2C), 55.2 (o), 52.1 (o), 50.3 (e), 42.3 (e, *J* = 20.6 Hz, quint), 22.6 (o); IR (neat):  $\tilde{\nu}$  = 3008 (w), 2953 (w), 2836 (w), 1723 (s), 1608 (m), 1579 (w), 1510 (m), 1494 (m), 1457 (w), 1442 (m), 1457 (w), 1380 (w), 1311 (w), 1230 (m), 1248 (vs), 1189 (m), 1177 (m), 1129 (s), 1110 (w), 1074 (w), 1038 (m), 976 (m), 896 (w), 867 (w), 837 (m), 809 (m), 775 (m), 763 (m), 729 (m), 698 (m) cm<sup>-1</sup>; HRMS (ESI) calcd for (C<sub>20</sub>H<sub>20</sub>D<sub>2</sub>O<sub>3</sub> + Na): 335.1592; found: 335.1590; elemental analysis (%) calcd for C<sub>20</sub>H<sub>20</sub>D<sub>2</sub>O<sub>3</sub>: C 76.89, H 7.10; found: C 76.76, H 7.20.

**Compound 4f.** Intermediate **4d** (3.2 mmol, 1.0 g) was dissolved in CH<sub>2</sub>Cl<sub>2</sub> (32 mL) and cooled to -78 °C.

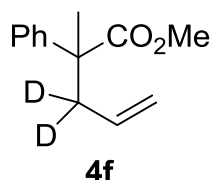

Ozone was bubbled through the solution using a pipette for 20 minutes (light blue colour change) until reaction was complete by TLC. Triphenyl phosphine (4.8 mmol, 1.26 g) was added to the solution and compressed air was bubbled through the solution for 15 minutes whilst the reaction is allowed to warm to room temperature. The solution was concentrated and purified by flash column chromatography (petroleum ether/Et<sub>2</sub>O = 19:1) to afford a colourless oil (678 mg, 68%) as a 2:1 ratio mixture of **4e**

and 4-methoxybenzaldehyde which was used as this purity for the next step. Under N<sub>2</sub> atmosphere, *n*butyllithium (4.22 mmol, 1.7 mL, 2.5 M in hexanes) was added to methyltriphenylphosphonium bromide (4.22 mmol, 1.5 g) in THF (25 mL) at -78 °C. The reaction mixture was warmed to 40 °C for 15 minutes until white solid was dissolved, before cooling to -78 °C and adding a solution of **4e** (3.84 mmol, 678 mg) in THF (13 mL) *via* cannula. The mixture was heated to 40 °C for 18 hours before being quenched at room temperature with a saturated aqueous solution of ammonium chloride and extracted with Et<sub>2</sub>O (2 × 30 mL). The combined organic layers were dried over MgSO<sub>4</sub>, filtered and concentrated. The crude mixture was purified by flash column chromatography (petroleum ether/Et<sub>2</sub>O = 99:1) afforded **4f** as a colourless oil (190 mg, 43%). <sup>1</sup>H NMR (500 MHz, CDCl<sub>3</sub>): δ = 7.37-7.28 (m, 4H), 7.26-7.22 (m, 1H), 5.60 (dd, *J* = 17.0, 10.2 Hz, 1H), 5.11-5.04 (m, 2H), 3.66 (s, 3H), 1.53 (s, 3H); <sup>13</sup>C NMR (125 MHz, CDCl<sub>3</sub>): δ = 176.3 (e), 143.3 (e), 133.9 (o), 128.4 (o, 2C), 126.8 (o), 125.9 (o, 2C), 118 (e), 52.1 (o), 49.8 (e), 43.0 (e, *J* = 19.8 Hz, quint.), 22.6 (o); IR (neat):  $\tilde{\nu}$  = 2978 (w), 2951 (w), 1731 (vs), 1637 (w), 1600 (w), 1497 (w), 1446 (w), 1378 (w), 1249 (m), 1166 (w), 1126 (m), 1079 (w), 1055 (w), 1031 (w), 1001 (w), 920 (w), 767 (w), 733 (w), 699 (m); cm<sup>-1</sup>; HRMS (CI(NH<sub>4</sub>)) calcd for (C<sub>13</sub>H<sub>14</sub>D<sub>2</sub>O<sub>2</sub> + H): 207.1333; found: 207.1347; elemental analysis (%) calcd for C<sub>13</sub>H<sub>14</sub>D<sub>2</sub>O<sub>2</sub>: C 75.75, H 7.82; found: C 75.93, H 7.84.

**Compound 4g.** This compound was obtained from **4f** (0.922 mmol, 190 mg) following the same procedure as for the preparation of **1b**. Colourless oil (140 mg, 85%). <sup>1</sup>H NMR (500 MHz, CDCl<sub>3</sub>): δ =

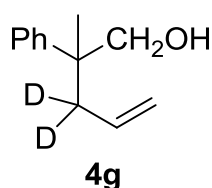

7.40-7.33 (m, 4H), 7.26-7.21 (m, 1H), 5.59 (dd, *J* = 17.1, 10.2 Hz, 1H), 5.05 (dd, *J* = 17.1, 2.2 Hz, 1H), 5.00 (dd, *J* = 10.1, 2.2 Hz, 1H), 3.75 (dd, *J* = 11.0, 5.6 Hz, 1H), 3.60 (dd, *J* = 10.9, 7.4 Hz, 1H), 1.34 (s, 3H), 1.32-1.22 (m, 1H (OH)); <sup>13</sup>C NMR (125 MHz, CDCl<sub>3</sub>): δ = 144.5, 134.4, 128.4 (2C), 126.6 (2C), 126.2, 117.6, 71.7, 43.0, 42.1 (*J* = 19.7 Hz, quint.), 21.7; IR (neat):  $\tilde{\nu}$  = 3358 (br), 3059 (w), 3025 (w), 2973 (w), 2934 (w), 2875 (w), 1635 (w), 1601 (w), 1581 (w), 1497 (m), 1445 (m), 1413 (w), 1374 (w),

1277 (w), 1193 (w), 1133 (w), 1025 (s), 1001 (m), 950 (wq), 914 (m), 872 (w), 842 (w), 759 (m), 738 (w), 698 (vs)  $\text{cm}^{-1}$ ; elemental analysis (%) calcd for  $\text{C}_{12}\text{H}_{14}\text{D}_2\text{O}$ : C 80.85, H 9.04; found: C 81.17, H 9.27.

**Compound 4.** This compound was obtained from **4g** (0.56 mmol, 100mg) following the same procedure as for the preparation of **1**. Colourless oil (80 mg, 82%).  $^1\text{H}$  NMR (500 MHz,  $\text{CDCl}_3$ ):  $\delta$  = 9.52 (s, 1H), 7.42-7.36 (m, 2H), 7.32-7.27 (m, 1H), 7.26-7.23 (m, 2H), 5.53 (dd,  $J$  = 17.0, 10.2 Hz, 1H), 5.06 (dd,  $J$  = 16.8, 2.0 Hz, 1H), 5.03 (dd,  $J$  = 9.8, 2.0 Hz, 1H), 1.44 (s, 3H);  $^{13}\text{C}$  NMR (125 MHz,  $\text{CDCl}_3$ ):  $\delta$  = 202.0, 139.3, 133.1, 128.8 (2C), 127.3, 127.2 (2C), 118.7, 53.5, 39.8 ( $J$  = 20.1 Hz, quint.), 18.7; IR (neat):  $\tilde{\nu}$  = 3061 (w), 2977 (w), 2935 (w), 2805 (w), 2706 (w), 1723 (vs), 1637 (w), 1599 (w), 1582 (w), 1494 (m), 1445 (m), 1414 (w), 1389 (w), 1372 (w), 1229 (w), 1192 (w), 1129 (w), 1060 (w), 1029 (m), 1000 (m), 918 (m), 759 (m), 699 (s)  $\text{cm}^{-1}$ ; HRMS (CI( $\text{NH}_4$ )) calcd for ( $\text{C}_{12}\text{H}_{12}\text{D}_2\text{O}$  +  $\text{NH}_4$ ): 194.1503; found: 194.1508; elemental analysis (%) calcd for  $\text{C}_{12}\text{H}_{12}\text{D}_2\text{O}$ : C 81.77, H 8.01; found: C 81.95, H 7.81.

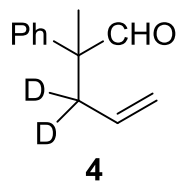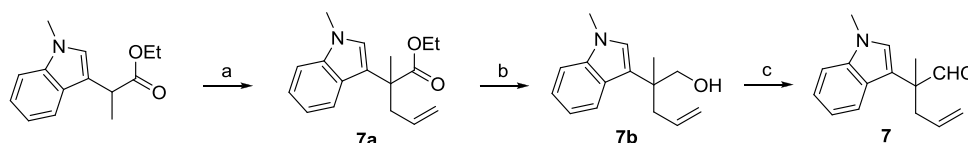

(a) i) NaHMDS, DMF, 0 °C; ii) allyl bromide, 0 °C to rt, 50%. (b)  $\text{LiAlH}_4$ ,  $\text{Et}_2\text{O}$ , 91%. (c)  $(\text{COCl})_2$ , DMSO,  $\text{Et}_3\text{N}$ ,  $\text{CH}_2\text{Cl}_2$ , 96%.

**Compound 7a.** Under  $\text{N}_2$  atmosphere, Ethyl 2-(1-methylindol-3-yl)propionate (0.49 mmol, 113 mg) and Sodium bis(trimethylsilyl)amide (0.54 mmol, 99 mg) were dissolved in DMF (2.5 mL) and cooled to 0 °C and stirred for 30 minutes. Allyl bromide (0.54 mmol, 47  $\mu\text{L}$ ) was added and the reaction mixture was warmed to room temperature and stirred for 48 hours. The reaction mixture was cooled to 0 °C, diluted with  $\text{Et}_2\text{O}$  and quenched carefully with a saturated aqueous solution of ammonium chloride. The organic layer was washed with water (2  $\times$  10 mL), dried over  $\text{MgSO}_4$  and the solvent was removed under reduced pressure. Purification by flash column chromatography (petroleum ether/ $\text{Et}_2\text{O}$  = 15:1) afforded **7a** as a colourless oil (67 mg, 50%).

$^1\text{H}$  NMR (500 MHz,  $\text{CDCl}_3$ ):  $\delta$  = 7.68 (d,  $J$  = 8.1 Hz, 1H), 7.30-7.26 (m, 1H), 7.23-7.18 (m, 1H), 7.09-7.05 (m, 1H), 6.92 (s, 1H), 5.67 (ddt,  $J$  = 17.1, 10.0, 7.2 Hz, 1H), 5.11-5.05 (m, 1H), 5.05-5.01 (m, 1H), 4.18-4.07 (m, 2H), 3.76 (s, 3H), 2.95 (dd,  $J$  = 13.7, 7.5 Hz, 1H), 2.83 (dd,  $J$  = 13.7, 6.9 Hz, 1H), 1.61 (s, 3H), 1.16 (t,  $J$  = 7.1 Hz, 3H);  $^{13}\text{C}$  NMR (125 MHz,  $\text{CDCl}_3$ ):  $\delta$  = 176.0 (e), 137.4 (e), 134.4 (o), 126.0 (e), 125.9 (o), 121.5 (o), 120.5 (o), 118.8 (o), 117.9 (e), 117.7 (e), 109.3 (o), 60.7 (e), 45.5 (e), 42.6 (e), 32.7 (o), 22.8 (o), 14.2 (o); IR (neat):  $\tilde{\nu}$  = 3051 (w), 2978 (w), 2935 (w), 1720 (s), 1640 (w), 1615 (w), 1545 (w), 1484 (m), 1465 (m), 1425 (w), 1372 (m), 1330 (m), 1279 (w), 1233 (m), 1207 (m), 1172 (w), 1137 (m), 1096 (m), 1065 (w), 1018 (m), 993 (w), 955 (w), 916 (m), 858 (w), 809 (w), 766 (w), 737 (vs), 681 (w), 657 (w)  $\text{cm}^{-1}$ ; HRMS (CI( $\text{CH}_4$ )) calcd for ( $\text{C}_{17}\text{H}_{21}\text{NO}_2$  + H): 272.1645; found: 272.1646.

**Compound 7b.** This compound was obtained from **7a** (0.383 mmol, 104 mg) following the same procedure as for the preparation of **1b**. Colourless oil (80 mg, 91%).

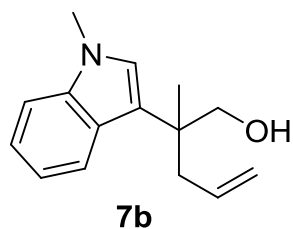

$^1\text{H}$  NMR (500 MHz,  $\text{CDCl}_3$ ):  $\delta$  = 7.78 (dt,  $J$  = 8.1, 0.9 Hz, 1H), 7.32 (dt,  $J$  = 8.2, 0.9 Hz, 1H), 7.23 (ddd,  $J$  = 8.2, 7.1, 1.1 Hz, 1H), 7.09 (ddd,  $J$  = 8.1, 7.0, 1.1 Hz, 1H), 6.89 (s, 1H), 5.67 (dddd,  $J$  = 17.0, 10.1, 8.1, 6.5 Hz, 1H), 5.05 (ddt,  $J$  = 17.1, 2.4, 1.4 Hz, 1H), 4.97 (ddt,  $J$  = 10.1, 2.1, 1.1 Hz, 1H), 3.93 (dd,  $J$  = 10.7, 5.6 Hz, 1H), 3.76 (s, 3H), 3.72 (dd,  $J$  = 10.7, 7.9 Hz, 1H), 2.76 (ddt,  $J$  = 13.7, 6.5, 1.3 Hz, 1H), 2.47 (ddt,  $J$  = 13.7, 8.0, 1.0 Hz, 1H), 1.40 (s, 3H), 1.23 (dd,  $J$  = 7.8, 5.6 Hz, 1H (OH));  $^{13}\text{C}$  NMR (125 MHz,  $\text{CDCl}_3$ ):  $\delta$  = 137.9 (e), 135.1 (o), 127.8 (o), 126.1 (e), 121.5 (o), 121.0 (o), 118.8 (o), 117.7 (e), 117.2 (e), 109.6 (o), 70.4 (e), 42.1 (e), 41.0 (e), 32.8 (o), 22.4 (o); IR (neat):  $\tilde{\nu}$  = 3396 (br), 3064 (w), 2931 (m), 2877 (w), 1638 (w), 1615 (w), 1544 (w), 1484 (m), 1464 (m), 1424 (w), 1374 (m), 1330 (m), 1243 (m), 1137 (w), 1111 (w), 1034 (m), 996 (w), 913 (m), 810 (w), 765 (w), 738 (vs)  $\text{cm}^{-1}$ ; HRMS (CI( $\text{CH}_4$ )) calcd for ( $\text{C}_{15}\text{H}_{19}\text{NO}$  + H): 230.1539; found: 230.1539.

**Compound 7.** This compound was obtained from **7b** (0.35 mmol, 79 mg) following the same procedure as for the preparation of **1**. Colourless oil (75 mg, 96%). <sup>1</sup>H NMR (500 MHz, CDCl<sub>3</sub>): δ = 9.49 (s, 1H), 7.57 (dt, *J* = 8.1, 0.9 Hz, 1H), 7.32 (dt, *J* = 8.3, 0.9 Hz, 1H), 7.26-7.22 (m, 1H), 7.10 (ddd, *J* = 8.1, 7.0, 1.1 Hz, 1H), 6.96 (s, 1H), 5.61 (dddd, *J* = 17.1, 10.1, 7.7, 6.7 Hz, 1H), 5.07 (ddt, *J* = 17.0, 2.1, 1.4 Hz, 1H), 5.01 (ddt, *J* = 10.1, 2.1, 1.0 Hz, 1H), 3.80 (s, 3H), 2.91 (ddt, *J* = 14.1, 6.7, 1.3 Hz, 1H), 2.72 (ddt, *J* = 14.0, 7.8, 1.1 Hz, 1H), 1.49 (s, 3H); <sup>13</sup>C NMR (125 MHz, CDCl<sub>3</sub>): δ = 201.6 (o), 137.6 (e), 133.7 (o), 127.4 (o), 126.1 (e), 121.8 (o), 120.1 (o), 119.4 (o), 118.0 (e), 112.9 (e), 109.5 (o), 49.8 (e), 38.9 (e), 32.8 (o), 18.8 (o); IR (neat):  $\tilde{\nu}$  = 3064 (w), 2976 (w), 2932 (w), 2800 (w), 2702 (w), 1717 (s), 1640 (w), 1615 (w), 1541 (w), 1483 (m), 1465 (m), 1424 (w), 1367 (m), 1330 (m), 1243 (m), 1215 (w), 1153 (w), 1136 (w), 1111 (w), 1099 (w), 1071 (w), 1018 (w), 994 (m), 910 (s), 845 (w), 818 (w), 736 (vs), 667 (w) cm<sup>-1</sup>; HRMS (CI(NH<sub>4</sub>)) calcd for (C<sub>15</sub>H<sub>17</sub>NO + H): 228.1383; found: 228.1380.

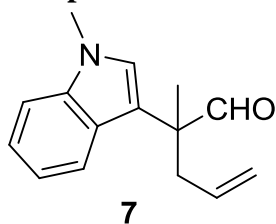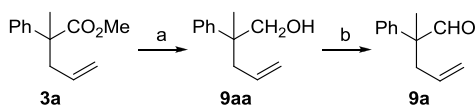

(<sup>a</sup>) LiAlH<sub>4</sub>, Et<sub>2</sub>O, 93%. (<sup>b</sup>) (COCl)<sub>2</sub>, DMSO, Et<sub>3</sub>N, CH<sub>2</sub>Cl<sub>2</sub>, 89%.

**Compound 9aa.** This compound was obtained from **3a** (4.90 mmol, 1.0 g) following the same procedure as for the preparation of **1b**. Colourless oil (800 mg, 93%). <sup>1</sup>H NMR (500 MHz, CDCl<sub>3</sub>): δ = 7.39-7.33 (m, 4H), 7.25-7.21 (m, 1H), 5.60 (dddd, *J* = 17.0, 10.2, 7.9, 6.7 Hz, 1H), 5.05 (ddt, *J* = 17.0, 2.2, 1.4 Hz, 1H), 4.99 (ddt, *J* = 10.2, 2.2, 1.1 Hz, 1H), 3.76 (dd, *J* = 11.0, 5.8 Hz, 1H), 3.62 (ddt, *J* = 11.0, 7.5 Hz, 1H), 2.56 (ddt, *J* = 14.0, 6.6, 1.2 Hz, 1H), 2.37 (ddt, *J* = 13.9, 7.9, 1.1 Hz, 1H), 1.35 (s, 3H), 1.22 (dd, *J* = 7.5, 5.8 Hz, 1H); <sup>13</sup>C NMR (125 MHz, CDCl<sub>3</sub>): δ = 144.6 (e), 134.5 (o), 128.4 (o, 2C), 126.7 (o, 2C), 126.2 (o), 117.5 (e), 71.7 (e), 43.1 (e), 42.9 (e), 21.8 (o); IR (neat):  $\tilde{\nu}$  = 3362 (br), 3060 (w), 2973 (m), 2920 (m), 2875 (m), 1638 (m), 1600 (w), 1497 (m), 1445 (m), 1415 (w), 1375 (w), 1312 (w), 1156 (w), 1025 (s), 997 (m), 950 (w), 913 (s), 763 (s), 699 (vs), 670 (w) cm<sup>-1</sup>; HRMS (CI(NH<sub>4</sub>)) calcd for (C<sub>12</sub>H<sub>16</sub>O + NH<sub>4</sub>): 194.1539; found: 194.1548.

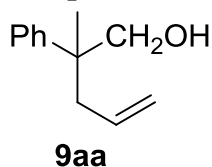

**Compound 9a.** This compound was obtained from **9aa** (284 mmol, 500 mg) following the same procedure as for the preparation of **1**. Colourless oil (440 mg, 89%). <sup>1</sup>H NMR (500 MHz, CDCl<sub>3</sub>): δ = 9.53 (s, 1H), 7.41-7.36 (m, 2H), 7.31-7.27 (m, 1H), 7.26-7.24 (m, 2H), 5.55 (dddd, *J* = 17.0, 10.1, 7.7, 6.9 Hz, 1H), 5.06 (ddt, *J* = 16.8, 2.0, 1.4 Hz, 1H), 5.03 (ddt, *J* = 10.2, 2.1, 1.0 Hz, 1H), 2.70 (ddt, *J* = 14.1, 6.9, 1.2 Hz, 1H), 2.63 (ddt, *J* = 14.1, 7.7, 1.1 Hz, 1H), 1.45 (s, 3H); <sup>13</sup>C NMR (125 MHz, CDCl<sub>3</sub>): δ = 201.9 (o), 139.4 (e), 133.1 (o), 128.8 (o, 2C), 127.3 (o), 127.1 (o, 2C), 118.6 (e), 53.6 (e), 40.6 (e), 18.8 (o); IR (neat):  $\tilde{\nu}$  = 3077 (w), 3025 (w), 2978 (w), 2934 (w), 2806 (w), 2710 (w), 1722 (s), 1640 (w), 1599 (w), 1581 (w), 1494 (m), 1445 (m), 1417 (w), 1389 (w), 1372 (w), 1272 (w), 1158 (w), 1077 (w), 1029 (m), 996 (m), 917 (m), 876 (w), 857 (w), 833 (w), 760 (m), 698 (vs) cm<sup>-1</sup>; HRMS (CI(NH<sub>4</sub>)) calcd for (C<sub>12</sub>H<sub>14</sub>O + NH<sub>4</sub>): 192.1383; found: 192.1390.

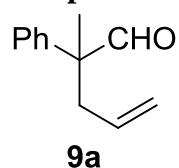



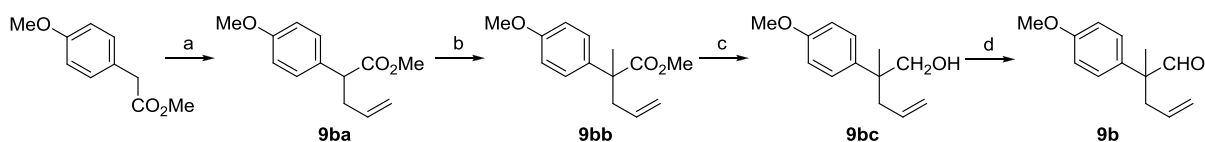

(<sup>a</sup>) i) LDA, THF, -78 °C; ii) allyl bromide, *n*Bu<sub>4</sub>NI, -78 °C to rt, 74%. (<sup>b</sup>) i) LDA, THF, -78 °C; ii) MeI, 66%. (<sup>c</sup>) LiAlH<sub>4</sub>, Et<sub>2</sub>O, 85%. (<sup>d</sup>) (COCl)<sub>2</sub>, DMSO, Et<sub>3</sub>N, CH<sub>2</sub>Cl<sub>2</sub>, 84%.

**Compound 9bb.** Known intermediate **9ba**<sup>4</sup> was first obtained as colourless oil (897 mg, 74%) from

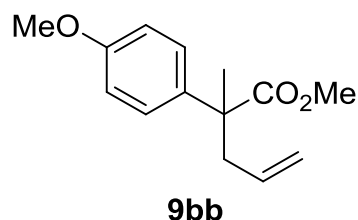

methyl (4-methoxyphenyl)acetate (5.55 mmol, 895 μL) following the same procedure as for the preparation of **1a**. Under N<sub>2</sub> atmosphere, diisopropylamine (2.50 mmol, 353 μL) was dissolved in THF (8 mL) and cooled to 0 °C. *n*Butyllithium (2.50 mmol, 1 mL, 2.5M in hexanes) was added and stirred for 15 minutes at 0 °C before cooling to -78 °C and adding Methyl 2-allyl-2-(*p*-methoxy)phenylacetate (2.27 mmol, 500 mg), stirring for 30 minutes at -78 °C. Methyl iodide (2.50 mmol, 156 μL) was

added and the reaction mixture was warmed to room temperature and stirred for 16 hours. The reaction mixture was cooled to 0 °C, diluted with Et<sub>2</sub>O and quenched carefully with saturated aqueous solution of ammonium chloride. After extraction, the organic phase was dried over MgSO<sub>4</sub> and the solvent removed under reduced pressure. Purification by flash column chromatography (petroleum ether/Et<sub>2</sub>O = 99:1) afforded **9bb** as a colourless oil (350 mg, 66%). <sup>1</sup>H NMR (500 MHz, CDCl<sub>3</sub>): δ = 7.26-7.21 (m, 2H), 6.88-6.84 (m, 2H), 5.60 (ddt, *J* = 17.1, 10.0, 7.2 Hz, 1H), 5.10-5.01 (m, 2H), 3.80 (s, 3H), 3.65 (s, 3H), 2.80 (dd, *J* = 13.7, 7.4 Hz, 1H), 2.64 (dd, *J* = 13.7, 7.0 Hz, 1H), 1.51 (s, 3H); <sup>13</sup>C NMR (125 MHz, CDCl<sub>3</sub>): δ = 176.3 (e), 158.2 (e), 135.2 (e), 134.0 (o), 127.0 (o, 2C), 118.2 (e), 113.6 (o, 2C), 55.1 (o), 52.0 (o), 49.1 (e), 43.7 (e), 22.5 (o); IR (neat):  $\tilde{\nu}$  = 3076 (w), 2979 (w), 2951 (w), 2838 (w), 1727 (vs), 1640 (w), 1610 (w), 1582 (w), 1513 (vs), 1461 (m), 1442 (m), 1417 (w), 1377 (w), 1278 (m), 1249 (vs), 1184 (s), 1143 (s), 1096 (m), 1032 (s), 1010 (w), 995 (m), 957 (w), 916 (m), 829 (s), 804 (m), 790 (w), 774 (w), 753 (w), 738 (w), 666 (w) cm<sup>-1</sup>; HRMS (CI(NH<sub>4</sub>)) calcd for (C<sub>14</sub>H<sub>18</sub>O<sub>3</sub> + H): 235.1328; found: 235.1336.

**Compound 9bc.** This compound was obtained from **9bb** (1.50 mmol, 350 mg) following the same

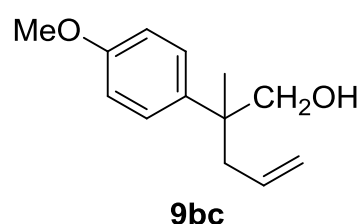

procedure as for the preparation of **1b**. Colourless oil (262 mg, 85%). <sup>1</sup>H NMR (500 MHz, CDCl<sub>3</sub>): δ = 7.31-7.26 (m, 2H), 6.91-6.87 (m, 2H), 5.60 (dddd, *J* = 17.0, 10.1, 7.8, 6.8 Hz, 1H), 5.07-5.01 (m, 1H), 5.01-4.97 (m, 1H), 3.80 (s, 3H), 3.71 (dd, *J* = 10.9, 5.7 Hz, 1H), 3.58 (dd, *J* = 10.9, 7.4 Hz, 1H), 2.53 (dd, *J* = 13.9, 6.6 Hz, 1H), 2.34 (dd, *J* = 13.9, 7.9 Hz, 1H), 1.32 (s, 3H), 1.21 (dd, *J* = 7.1, 6.1 Hz, 1H (OH)); <sup>13</sup>C NMR (125 MHz, CDCl<sub>3</sub>): δ = 157.9 (e), 136.4 (e), 134.6 (o), 127.7 (o, 2C), 117.7 (e), 113.8 (o, 2C), 71.8

(e), 55.2 (o), 43.0 (e), 42.6 (e), 21.9 (o); IR (neat):  $\tilde{\nu}$  = 3402 (br), 3074 (w), 2962 (w), 2933 (w), 2836 (w), 1638 (w), 1610 (m), 1580 (w), 1513 (vs), 1464 (m), 1441 (m), 1415 (w), 1373 (w), 1298 (m), 1247 (vs), 1185 (s), 1115 (w), 1028 (vs), 1010 (m), 951 (w), 912 (m), 827 (s), 798 (m), 735 (w), 680 (w) cm<sup>-1</sup>; HRMS (CI(NH<sub>4</sub>)) calcd for (C<sub>13</sub>H<sub>18</sub>O<sub>2</sub> + NH<sub>4</sub>): 224.1645; found: 224.1652.

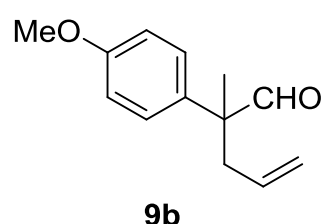

**Compound 9b.** This compound was obtained from **9bc** (0.49 mmol, 100 mg) following the same procedure as for the preparation of **1**. Colourless oil (83 mg, 84%). <sup>1</sup>H NMR (500 MHz, CDCl<sub>3</sub>): δ = 9.47 (s, 1H), 7.19-7.15 (m, 2H), 6.94-6.89 (m, 2H), 5.56 (dddd, *J* = 17.0, 10.2, 7.7, 6.9 Hz, 1H), 5.08-5.01 (m, 2H), 3.81 (s, 3H), 2.67 (ddt, *J* = 14.0, 6.9, 1.3 Hz, 1H), 2.60 (ddt, *J* = 14.1, 7.8, 1.1 Hz, 1H), 1.42 (s, 3H); <sup>13</sup>C NMR (125 MHz, CDCl<sub>3</sub>): δ = 201.9 (o), 158.8

<sup>4</sup> P.-S. Lai, J. A. Dubland, M. G. Sawar, M. G. Chudzinski, M. S. Taylor, *Tetrahedron* **2011**, *67*, 7586

(e), 133.3 (o), 131.2 (e), 128.3 (o, 2C), 118.4 (e), 114.2 (o, 2C), 55.3 (o), 52.9 (e), 40.5 (e), 18.9 (o); IR (neat):  $\tilde{\nu}$  = 3077 (w), 2977 (w), 2935 (w), 2837 (w), 2709 (w), 1720 (s), 1639 (w), 1609 (m), 1580 (w), 1512 (s), 1463 (m), 1442 (w), 1417 (w), 1389 (w), 1372 (w), 1299 (m), 1250 (vs), 1184 (s), 1116 (w), 1032 (s), 997 (w), 914 (m), 827 (s), 799 (m), 729 (w), 705 (w)  $\text{cm}^{-1}$ ; HRMS (CI(NH<sub>4</sub>)) calcd for (C<sub>13</sub>H<sub>16</sub>O<sub>2</sub> + NH<sub>4</sub>): 222.1489; found: 222.1486; elemental analysis (%) calcd for C<sub>13</sub>H<sub>16</sub>O<sub>2</sub>: C 76.44, H 7.90; found: C 76.85, H 8.00.

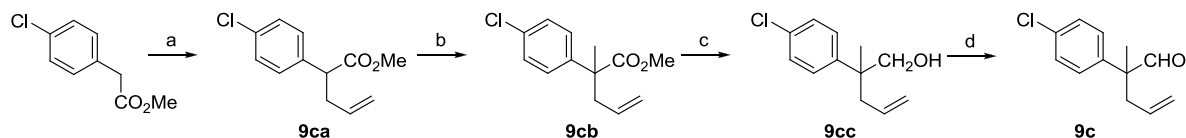

(a) i) LDA, THF, -78 °C; ii) allyl bromide, nBu<sub>4</sub>NI, -78 °C to rt, 78%. (b) i) LDA, THF, -78 °C; ii) MeI, 58%. (c) LiAlH<sub>4</sub>, Et<sub>2</sub>O, 98%. (d) (COCl)<sub>2</sub>, DMSO, Et<sub>3</sub>N, CH<sub>2</sub>Cl<sub>2</sub>, 90%.

**Compound 9cb.** Known intermediate **9ca**<sup>5</sup> was first obtained as colourless oil (995 mg, 78%) from methyl 2-(4-chlorophenyl)acetate (5.42 mmol, 1.0 g) following the same procedure as for the preparation of **1a**. Then **9cb** was obtained from **9ca** (2.23 mmol, 500 mg) following the same procedure as for the preparation of **9bb**. Colourless oil (309 mg, 58%). <sup>1</sup>H NMR (500 MHz, CDCl<sub>3</sub>):  $\delta$  = 7.32-7.28 (m, 2H), 7.26-7.22 (m, 2H), 5.57 (ddt,  $J$  = 17.1, 10.0, 7.1 Hz, 1H), 5.09-5.02 (m, 2H), 3.66 (s, 3H), 2.79 (dd,  $J$  = 13.7, 7.4 Hz, 1H), 2.63 (dd,  $J$  = 13.7, 7.1 Hz, 1H), 1.52 (s, 3H); <sup>13</sup>C NMR (125 MHz, CDCl<sub>3</sub>):  $\delta$  = 175.8 (e), 141.7 (e), 133.5 (o), 132.7 (e), 128.5 (o, 2C), 127.5 (o, 2C), 118.7 (e), 52.2 (o), 49.6 (e), 43.6 (e), 22.5 (o); IR (neat):  $\tilde{\nu}$  = 3078 (w), 2981 (w), 2951 (w), 1732 (vs), 1641 (w), 1494 (m), 1460 (w), 1434 (w), 1402 (w), 1378 (w), 1291 (w), 1235 (m), 1145 (m), 1096 (m), 1013 (m), 995 (w), 919 (m), 827 (m), 760 (w), 735 (w)  $\text{cm}^{-1}$ ; HRMS (CI(CH<sub>4</sub>)) calcd for (C<sub>13</sub>H<sub>15</sub><sup>35</sup>ClO<sub>2</sub> + H): 239.0833; found: 239.0842.

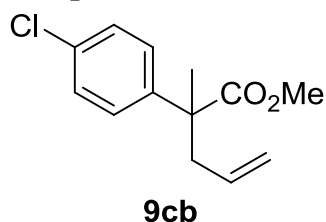

**Compound 9cc.** This compound was obtained from **9cb** (1.26 mmol, 300 mg) following the same procedure as for the preparation of **1b**. Colourless oil (261 mg, 98%). <sup>1</sup>H NMR (500 MHz, CDCl<sub>3</sub>):  $\delta$  = 7.34-7.28 (m, 4H), 5.57 (dddd,  $J$  = 17.0, 10.1, 7.7, 6.8 Hz, 1H), 5.07-4.98 (m, 2H), 3.73 (dd,  $J$  = 11.0, 5.8 Hz, 1H), 3.60 (dd,  $J$  = 11.0, 7.2 Hz, 1H), 2.52 (dd,  $J$  = 13.9, 6.7 Hz, 1H), 2.35 (dd,  $J$  = 13.9, 7.8 Hz, 1H), 1.32 (s, 3H), 1.24 (t,  $J$  = 6.5 Hz, 1H (OH)); <sup>13</sup>C NMR (125 MHz, CDCl<sub>3</sub>):  $\delta$  = 143.3 (e), 134.0 (o), 132.1 (e), 128.5 (o, 2C), 128.2 (o, 2C), 117.9 (e), 71.5 (e), 43.0 (e), 42.9 (e), 21.9 (o); IR (neat):  $\tilde{\nu}$  = 3375 (br), 3076 (w), 2976 (w), 2923 (w), 2879 (w), 1639 (w), 1595 (w), 1494 (m), 1440 (w), 1400 (w), 1314 (w), 1154 (w), 1097 (m), 1031 (s), 1011 (vs), 997 (m), 951 (w), 914 (s), 823 (s), 749 (m), 722 (m), 672 (w)  $\text{cm}^{-1}$ ; HRMS (CI(NH<sub>4</sub>)) calcd for (C<sub>12</sub>H<sub>15</sub><sup>35</sup>ClO + NH<sub>4</sub>): 228.1150; found: 228.1148.

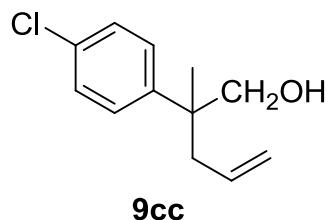

**Compound 9c.** This compound was obtained from **9cc** (0.48 mmol, 100 mg) following the same procedure as for the preparation of **1**. Colourless oil (89 mg, 90%). <sup>1</sup>H NMR (500 MHz, CDCl<sub>3</sub>):  $\delta$  = 9.50 (s, 1H), 7.38-7.33 (m, 2H), 7.21-7.16 (m, 2H), 5.52 (ddt,  $J$  = 17.0, 10.1, 7.2 Hz, 1H), 5.09-5.02 (m, 2H), 2.66 (dd,  $J$  = 14.2, 6.9 Hz, 1H), 2.60 (dd,  $J$  = 14.2, 7.7 Hz, 1H), 1.44 (s, 3H); <sup>13</sup>C NMR (125 MHz, CDCl<sub>3</sub>):  $\delta$  = 201.4 (o), 138.0 (e), 133.4 (e), 132.7 (o), 129.0 (o, 2C), 128.6 (o, 2C), 119.0 (e), 53.3 (e), 40.6 (e), 18.9 (o); IR (neat):  $\tilde{\nu}$  = 3078 (w), 2980 (w), 2935 (w), 2809 (w), 2711 (w), 1724 (vs), 1641 (w), 1595 (w), 1494 (m), 1460 (w), 1402 (w), 1372 (w), 1274 (w), 1097 (m), 1055 (w), 1033 (w), 1013 (m), 996 (m), 917 (m), 877 (w), 822 (m), 755 (m), 720 (m), 688 (w)  $\text{cm}^{-1}$ ; elemental analysis (%) calcd for C<sub>12</sub>H<sub>13</sub>ClO: C 69.07, H 6.28; found: C 69.92, H 6.40.

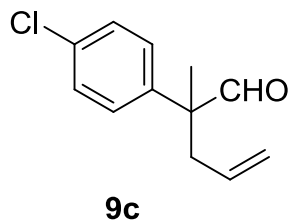

<sup>5</sup> M. Pour, M. Špulák, V. Balšánek, J. Kuneš, P. Kubanová, V. Buchta, *Bioorg. Med. Chem.* **2003**, *11*, 2843

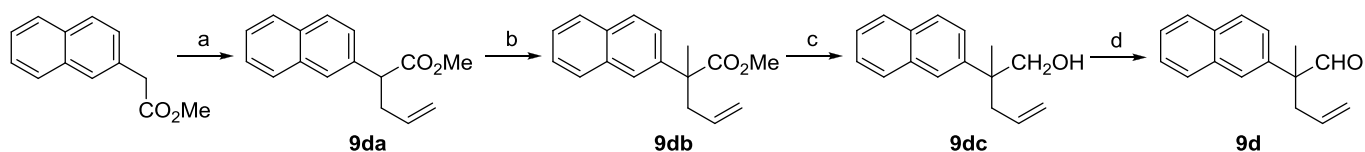

(<sup>a</sup>) i) LDA, THF, -78 °C; ii) allyl bromide, nBu<sub>4</sub>NI, -78 °C to rt, 55%. (<sup>b</sup>) i) LDA, THF, -78 °C; ii) MeI, 55%. (<sup>c</sup>) LiAlH<sub>4</sub>, Et<sub>2</sub>O, quantitative. (<sup>d</sup>) (COCl)<sub>2</sub>, DMSO, Et<sub>3</sub>N, CH<sub>2</sub>Cl<sub>2</sub>, 84%.

**Compound 9db.** Intermediate **9da** was first obtained as colourless oil (659 mg, 55%) from methyl 2-(naphthalen-2-yl)acetate (4.99 mmol, 1.0 g) following the same procedure as for the preparation of **1a**. Then **9db** was obtained from **9da** (1.25 mmol, 300 mg) following the same procedure as for the preparation of **9bb**. Colourless oil (174 mg, 55%).

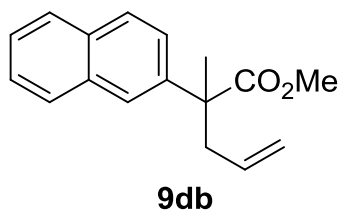

<sup>1</sup>H NMR (500 MHz, CDCl<sub>3</sub>): δ = 7.85-7.78 (m, 3H), 7.76-7.73 (m, 1H), 7.51-7.41 (m, 3H), 5.62 (ddt, *J* = 17.1, 9.8, 7.2 Hz, 1H), 5.13-5.07 (m, 1H), 5.07-5.02 (m, 1H), 3.67 (s, 3H), 2.92 (dd, *J* = 13.7, 7.5 Hz, 1H), 2.80 (dd, *J* = 13.7, 7.0 Hz, 1H), 1.64 (s, 3H); <sup>13</sup>C NMR (125 MHz, CDCl<sub>3</sub>): δ = 176.3 (e), 140.6 (e), 133.9 (o), 133.2 (e), 132.2 (e), 128.1 (o, 2C), 127.4 (o), 126.1 (o), 125.9 (o), 124.6 (o), 124.4 (o), 118.5 (e), 52.2 (o), 50.1 (e), 43.5 (e), 22.6 (o); IR (neat):  $\tilde{\nu}$  = 3059 (w), 2979 (w), 2950 (w), 1730 (vs), 1639 (w), 1600 (w), 1507 (w), 1458 (w), 1434 (w), 1379 (w), 1282 (w), 1233 (m), 1143 (m), 1108 (w), 995 (w), 918 (m), 856 (w), 818 (m), 778 (w), 750 (m); cm<sup>-1</sup>; HRMS (CI(CH<sub>4</sub>)) calcd for (C<sub>17</sub>H<sub>18</sub>O<sub>2</sub> + H): 255.1380; found: 255.1388.

**Compound 9dc.** This compound was obtained from **9db** (0.68 mmol, 174 mg) following the same procedure as for the preparation of **1b**. Colourless oil (155 mg, quantitative).

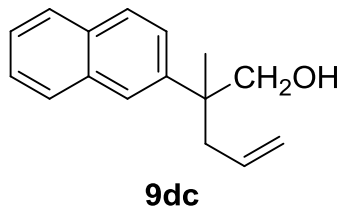

<sup>1</sup>H NMR (500 MHz, CDCl<sub>3</sub>): δ = 7.86-7.80 (m, 3H), 7.79-7.76 (m, 1H), 7.56-7.52 (m, 1H), 7.50-7.43 (m, 2H), 5.61 (dddd, *J* = 16.9, 10.2, 7.8, 6.7 Hz, 1H), 5.10-5.04 (m, 1H), 5.01-4.96 (m, 1H), 3.86 (dd, *J* = 11.0, 5.7 Hz, 1H), 3.71 (dd, *J* = 11.0, 7.5 Hz, 1H), 2.68 (dd, *J* = 13.9, 6.6 Hz, 1H), 2.45 (dd, *J* = 13.9, 7.9 Hz, 1H), 1.46 (s, 3H), 1.24 (dd, *J* = 13.0, 7.3 Hz, 1H (OH)); <sup>13</sup>C NMR (125 MHz, CDCl<sub>3</sub>): δ = 142.0 (e), 134.4 (o), 133.3 (e), 132.0 (e), 128.1 (o), 127.9 (o), 127.4 (o), 126.0 (o), 125.7 (o, 2C), 124.8 (o), 117.6 (e), 71.6 (e), 43.4 (e), 42.9 (e), 21.9 (o); IR (neat):  $\tilde{\nu}$  = 3372 (br), 3058 (w), 2973 (w), 2923 (w), 2875 (w), 1638 (w), 1599 (w), 1506 (w), 1468 (w), 1436 (w), 1415 (w), 1377 (w), 1314 (w), 1274 (w), 1243 (w), 1203 (w), 1133 (w), 1031 (m), 997 (m), 946 (w), 912 (m), 890 (w), 854 (m), 815 (s), 770 (w), 745 (vs), 695 (w), 662 (w) cm<sup>-1</sup>; HRMS (CI(CH<sub>4</sub>)) calcd for (C<sub>16</sub>H<sub>18</sub>O + H): 227.1431; found: 227.1422; elemental analysis (%) calcd for C<sub>16</sub>H<sub>18</sub>O: C 84.91, H 8.02; found: C 84.98, H 8.17.

**Compound 9d.** This compound was obtained from **9dc** (0.44 mmol, 100mg) following the same procedure as for the preparation of **1**. Colourless oil (83 mg, 84%).

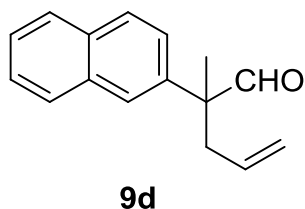

<sup>1</sup>H NMR (500 MHz, CDCl<sub>3</sub>): δ = 9.60 (s, 1H), 7.89-7.80 (m, 3H), 7.73-7.70 (m, 1H), 7.53-7.46 (m, 2H), 7.39-7.35 (m, 1H), 5.57 (ddt, *J* = 17.1, 10.0, 7.3 Hz, 1H), 5.08 (d, *J* = 17.1 Hz, 1H), 5.03 (d, *J* = 10.1 Hz, 1H), 2.82 (dd, *J* = 14.2, 6.8 Hz, 1H), 2.72 (dd, *J* = 14.2, 7.8 Hz, 1H), 1.56 (s, 3H); <sup>13</sup>C NMR (125 MHz, CDCl<sub>3</sub>): δ = 201.9 (o), 136.8 (e), 133.4 (e), 133.1 (o), 132.4 (e), 128.6 (o), 128.0 (o), 127.5 (o), 126.5 (o), 126.3 (o), 126.2 (o), 125.0 (o), 118.7 (e), 53.8 (e), 40.5 (e), 18.9 (o); IR (neat):  $\tilde{\nu}$  = 3058 (w), 2932 (w), 2977 (w), 2805 (w), 2706 (w), 1720 (vs), 1639 (w), 1598 (w), 1505 (w), 1456 (w), 1437 (w), 1416 (w), 1389 (w), 1374 (w), 1275 (w), 1245 (w), 1192 (w), 1132 (w), 1056 (w), 1018 (w), 995 (m), 949 (w), 915 (m), 891 (w), 879 (w), 856 (m), 816 (s), 769 (w), 747 (s), 667 (m) cm<sup>-1</sup>; HRMS (CI(NH<sub>4</sub>)) calcd for (C<sub>16</sub>H<sub>16</sub>O + NH<sub>4</sub>): 242.1539; found: 242.1533.

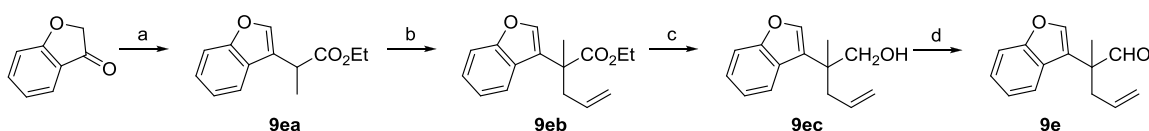

(a) ethyl-2-(triphenylphosphoranylidene)propionate, toluene, reflux, 37%. (b) i) LDA, THF, -78 °C; ii) allyl bromide, nBu<sub>4</sub>NI, -78 °C to rt, 57%. (c) LiAlH<sub>4</sub>, Et<sub>2</sub>O, 70%. (d) (COCl)<sub>2</sub>, DMSO, Et<sub>3</sub>N, CH<sub>2</sub>Cl<sub>2</sub>, 95%.

**Compound 9eb.** Intermediate **9ea** was first obtained as colourless oil (486 mg, 37%) from 3-coumaranone (6.54 mmol, 878 mg) and ethyl-2-(triphenylphosphoranylidene)propionate (6.54 mmol, 2.37 g) following a known procedure.<sup>6</sup> Then **9eb** was obtained from **9ea** (2.22 mmol, 485 mg) following the same procedure as for the preparation of **9bb**.

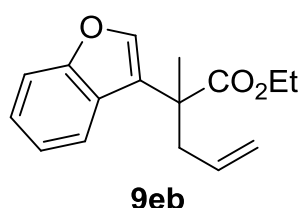

Purification by flash column chromatography (petroleum ether/Et<sub>2</sub>O = 24:1) afforded **9ga** as a colourless oil (328 mg, 57%). <sup>1</sup>H NMR (500 MHz, CDCl<sub>3</sub>): δ = 7.63 (d, *J* = 7.8 Hz, 1H), 7.48 (s, 1H), 7.47 (d, *J* = 8.2 Hz, 1H), 7.30-7.26 (m, 1H), 7.21 (t, *J* = 7.5 Hz, 1H), 5.65 (ddt, *J* = 17.1, 10.0, 7.2 Hz, 1H), 5.12-5.04 (m, 2H), 4.18-4.08 (m, 2H), 2.90 (dd, *J* = 13.7, 7.5 Hz, 1H), 2.81 (dd, *J* = 13.8, 7.1 Hz, 1H), 1.61 (s, 3H), 1.16 (t, *J* = 7.1 Hz, 3H); <sup>13</sup>C NMR (125 MHz, CDCl<sub>3</sub>): δ = 174.8 (e), 155.7 (e), 141.4 (o), 133.4 (o), 126.2 (e), 124.2 (o), 123.5 (e), 122.4 (o), 121.1 (o), 118.7 (e), 111.6 (o), 61.1 (e), 44.9 (e), 41.8 (e), 22.1 (o), 14.1 (o); IR (neat):  $\tilde{\nu}$  = 3077 (w), 2981 (w), 2938 (w), 1726 (s), 1640 (w), 1454 (s), 1377 (m), 1281 (w), 1233 (m), 1205 (m), 1144 (m), 1110 (m), 1091 (s), 1063 (w), 1014 (m), 995 (w), 957 (w), 917 (m), 858 (m), 808 (w), 758 (w), 744 (vs) cm<sup>-1</sup>; HRMS (CI(NH<sub>4</sub>)) calcd for (C<sub>16</sub>H<sub>18</sub>O<sub>3</sub> + H): 259.1329; found: 259.1332.

**Compound 9ec.** This compound was obtained from **9eb** (1.27 mmol, 328 mg) following the same procedure as for the preparation of **1b**. Colourless oil (191 mg, 70%). <sup>1</sup>H NMR

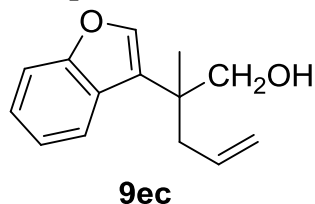

(500 MHz, CDCl<sub>3</sub>): δ = 7.74 (ddd, *J* = 7.7, 1.1, 0.9 Hz, 1H), 7.49 (ddd, *J* = 8.2, 1.1, 0.7 Hz, 1H), 7.44 (s, 1H), 7.27 (dddd, *J* = 8.2, 7.2, 1.3, 0.3 Hz, 1H), 7.23 (ddd, *J* = 7.8, 7.2, 1.1 Hz, 1H), 5.66 (dddd, *J* = 17.1, 10.0, 7.7, 6.7 Hz, 1H), 5.07 (ddt, *J* = 17.0, 2.2, 1.4 Hz, 1H), 5.01 (ddt, *J* = 10.1, 2.1, 1.0 Hz, 1H), 3.90 (dd, *J* = 10.9, 5.9 Hz, 1H), 3.75 (11.0, 7.4 Hz, 1H), 2.71 (ddt, *J* = 13.8, 6.8, 1.2 Hz, 1H), 2.49 (13.8, 7.9, 1.1 Hz, 1H), 1.40 (s, 3H), 1.31 (dd, *J* = 7.4, 5.9 Hz, 1H (OH)); <sup>13</sup>C NMR (125 MHz, CDCl<sub>3</sub>): δ = 156.0 (e), 142.5 (o), 134.2 (o), 126.4 (e), 124.2 (o, 2C), 122.4 (o), 121.5 (o), 117.9 (e), 111.9 (o), 69.6 (e), 41.1 (e), 40.2 (e), 21.5 (o); IR (neat):  $\tilde{\nu}$  = 3370 (br), 3074 (w), 2976 (w), 2933 (w), 1639 (w), 1453 (m), 1374 (w), 1258 (w), 1202 (w), 1112 (m), 1097 (m), 1041 (m), 1015 (m), 915 (m), 858 (m), 805 (w), 768 (m), 744 (vs), 698 (w) cm<sup>-1</sup>; HRMS (CI(CH<sub>4</sub>)) calcd for ((C<sub>14</sub>H<sub>16</sub>O<sub>2</sub> - H<sub>2</sub>O) + H): 199.1117; found: 199.1114.

**Compound 9e.** This compound was obtained from **9dc** (0.88 mmol, 190 mg) following the same procedure as for the preparation of **1**. Colourless oil (178 mg, 95%). <sup>1</sup>H NMR

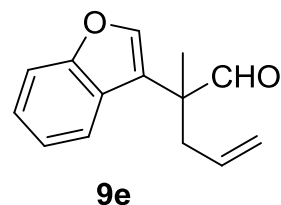

(500 MHz, CDCl<sub>3</sub>): δ = 9.58 (s, 1H), 7.55-7.51 (m, 1H), 7.53 (s, 1H), 7.52-7.49 (m, 1H), 7.31 (ddd, *J* = 8.3, 7.2, 1.1 Hz, 1H), 7.23 (ddd, *J* = 7.9, 7.2, 1.0 Hz, 1H), 5.61 (dddd, *J* = 17.0, 10.1, 7.7, 6.9 Hz, 1H), 5.12-5.04 (m, 2H), 2.86 (ddt, *J* = 14.1, 6.9, 1.2 Hz, 1H), 2.72 (ddt, *J* = 14.1, 7.7, 1.0 Hz, 1H), 1.52 (s, 3H); <sup>13</sup>C NMR (125 MHz, CDCl<sub>3</sub>): δ = 201.1 (o), 155.9 (e), 142.6 (o), 132.6 (o), 125.8 (e), 124.6 (o), 122.8 (o), 120.8 (o), 119.9 (e), 118.9 (e), 111.8 (o), 49.3 (e), 38.5 (e), 18.5 (o); IR (neat):  $\tilde{\nu}$  = 3370 (br), 3074 (w), 2976 (w), 2933 (w), 1639 (w), 1453 (m), 1374 (w), 1258 (w), 1202 (w), 1112 (m), 1097 (m), 1041 (m), 1015 (m), 915 (m), 858 (m), 805 (w), 768 (m), 744 (vs), 698 (w) cm<sup>-1</sup>; 3076 (w), 2979 (w), 2936 (w), 2807 (w), 2709 (w), 1724 (s), 1640 (w), 1615 (w), 1568 (w),

<sup>6</sup> A. M. Venkatesan, O. D. Santos, M. Asselin, G. T. Grosu, D. A. Evrard, R. E. Mershaw, K. Meagher, US 20090054454 A1

1454 (m), 1418 (w), 1388 (w), 1372 (w), 1328 (w), 1292 (w), 1252 (w), 1203 (w), 1164 (w), 1112 (m), 1097 (m), 1016 (m), 995 (m), 918 (m), 857 (m), 879 (w), 816 (w), 768 (m), 743 (vs), 656 (w)  $\text{cm}^{-1}$ ; HRMS (CI( $\text{CH}_4$ )) calcd for ( $\text{C}_{14}\text{H}_{14}\text{O}_2 + \text{H}$ ): 215.1067; found: 215.1067.

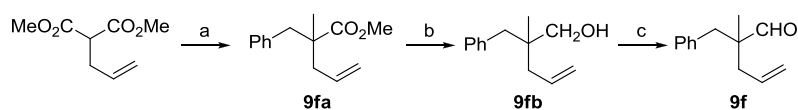

(<sup>a</sup>) i) NaH, benzyl bromide, THF; ii) LiCl, DMSO, 155 °C; iii) LDA, THF, -78 °C; iv) MeI, 65% over three steps. (<sup>b</sup>)  $\text{LiAlH}_4$ ,  $\text{Et}_2\text{O}$ , 82%. (<sup>c</sup>)  $(\text{COCl})_2$ , DMSO,  $\text{Et}_3\text{N}$ ,  $\text{CH}_2\text{Cl}_2$ , 72%.

**Compound 9fa.** Under  $\text{N}_2$  atmosphere, NaH (9.33 mmol, 373 mg, 60% dispersion in oil) was suspended in THF (16 mL) and the solution was cooled to 0 °C. Dimethyl allyl malonate (6.22 mmol, 1 mL) was added *via* syringe and the mixture was stirred to room temperature for 30 minutes. Benzyl bromide (7.46 mmol, 892  $\mu\text{L}$ ) was then added at 0 °C and the reaction was stirred to room temperature for 90 minutes. The reaction was quenched with a saturated aqueous solution of ammonium chloride and extracted with  $\text{Et}_2\text{O}$ . The combined organic layers were dried over  $\text{MgSO}_4$  and the solvent was removed under reduced pressure, affording the crude dimethyl 2-allyl-2-benzylmalonate which was then dissolved in DMSO (28 mL) under  $\text{N}_2$  atmosphere. Lithium chloride (10.07 mmol, 427 mg) and distilled water (0.2 mL) were added. After heating to 155 °C for 16 hours, the reaction was quenched with brine, extracted with  $\text{Et}_2\text{O}$  (3  $\times$  30 mL) and the combined organic layers were washed with water (3  $\times$  50 mL) and then dried over  $\text{MgSO}_4$ , filtered and concentrated. The resulting crude oil was purified by flash column chromatography (petroleum ether/ $\text{Et}_2\text{O}$  = 99:1), affording methyl 2-benzylpent-4-enoate (608 mg, 65%) as a colourless oil. The methylation procedure described for the preparation of **9bb** was applied to this material. Purification by flash column chromatography (petroleum ether/ $\text{Et}_2\text{O}$  = 50:1) afforded **9fa** as a colourless oil (643 mg, quantitative). <sup>1</sup>H NMR (500 MHz,  $\text{CDCl}_3$ ):  $\delta$  = 7.28-7.19 (m, 3H), 7.11-7.08 (m, 2H), 5.76 (dddd,  $J$  = 15.2, 10.9, 8.0, 7.4 Hz, 1H), 5.10-5.05 (m, 2H), 3.65 (s, 3H), 3.01 (d,  $J$  = 13.4 Hz, 1H), 2.73 (d,  $J$  = 13.3 Hz, 1H), 2.51 (dd,  $J$  = 13.7, 7.0 Hz, 1H), 2.18 (ddt,  $J$  = 13.7, 7.7, 1.1 Hz, 1H), 1.11 (s, 3H); <sup>13</sup>C NMR (125 MHz,  $\text{CDCl}_3$ ):  $\delta$  = 176.6 (e), 137.5 (e), 134.0 (o), 130.1 (o, 2C), 128.0 (o, 2C), 126.5 (o), 118.2 (e), 51.5 (o), 47.5 (e), 45.1 (e), 43.5 (e), 20.9 (o); IR (neat):  $\tilde{\nu}$  = 3065 (w), 3030 (w), 2980 (w), 2949 (w), 1728 (vs), 1640 (w), 1605 (w), 1496 (m), 1455 (m), 1434 (m), 1381 (w), 1333 (w), 1212 (m), 1195 (m), 1143 (m), 1120 (w), 1082 (w), 1058 (w), 1032 (w), 994 (m), 917 (m), 861 (w), 808 (w), 770 (w), 742 (m), 701 (vs)  $\text{cm}^{-1}$ ; HRMS (CI( $\text{CH}_4$ )) calcd for ( $\text{C}_{14}\text{H}_{18}\text{O}_2 + \text{H}$ ): 219.1379; found: 219.1382; elemental analysis (%) calcd for  $\text{C}_{14}\text{H}_{18}\text{O}_2$ : C 77.03, H 8.31; found: C 77.24, H 8.41.

**9fa**

**Compound 9fb.** This compound was obtained from **9fa** (2.29 mmol, 500 mg) following the same procedure as for the preparation of **1b**. Colourless oil (355 mg, 82%). <sup>1</sup>H NMR (500 MHz,  $\text{CDCl}_3$ ):  $\delta$  = 7.30-7.25 (m, 2H), 7.24-7.17 (m, 3H), 5.92 (ddt,  $J$  = 17.3, 9.8, 7.7 Hz, 1H), 5.14-5.08 (m, 2H), 3.34 (d,  $J$  = 5.9 Hz, 2H), 2.67 (d,  $J$  = 13.2 Hz, 1H), 2.57 (d,  $J$  = 13.2 Hz, 1H), 2.13 (ddt,  $J$  = 13.8, 7.6, 1.1 Hz, 1H), 2.04 (ddt,  $J$  = 13.8, 7.4, 1.2 Hz, 1H), 1.34 (t,  $J$  = 5.9 Hz, 1H (OH)); <sup>13</sup>C NMR (125 MHz,  $\text{CDCl}_3$ ):  $\delta$  = 138.3 (e), 135.0 (o), 130.5 (o, 2C), 127.8 (o, 2C), 125.9 (o), 68.4 (e), 42.9 (e), 41.6 (e), 39.1 (e), 21.1 (o); IR (neat):  $\tilde{\nu}$  = 3376 (br), 3074 (w), 3028 (w), 3003 (w), 2960 (w), 2923 (w), 2874 (w), 1638 (w), 1603 (w), 1495 (m), 1453 (m), 1414 (w), 1376 (w), 1317 (w), 1229 (w), 1155 (w), 1057 (w), 1029 (s), 998 (m), 912 (s), 877 (w), 813 (w), 780 (m), 729 (m), 700 (vs)  $\text{cm}^{-1}$ ; HRMS (CI( $\text{NH}_4$ )) calcd for ( $\text{C}_{13}\text{H}_{18}\text{O} + \text{NH}_4$ ): 208.1696; found: 208.1697.

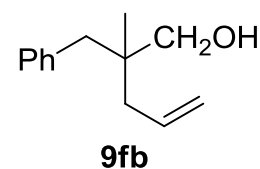

**Compound 9f.** This compound was obtained from **9fb** (0.53 mmol, 100 mg) following the same procedure as for the preparation of **1**. Colourless oil (71 mg, 72%). <sup>1</sup>H NMR (500 MHz,  $\text{CDCl}_3$ ):  $\delta$  = 9.60 (s, 1H), 7.29-7.25 (m, 2H), 7.24-7.19 (m, 1H), 7.11-7.08 (m, 2H), 5.74 (ddt,  $J$  = 17.2, 9.9, 7.2 Hz, 1H), 5.14-5.07 (m, 2H), 2.89 (d,  $J$  = 13.8 Hz,

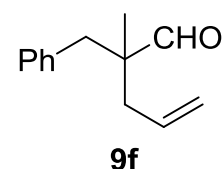

9.60 (s, 1H), 7.29-7.25 (m, 2H), 7.24-7.19 (m, 1H), 7.11-7.08 (m, 2H), 5.74 (ddt,  $J$  = 17.2, 9.9, 7.2 Hz, 1H), 5.14-5.07 (m, 2H), 2.89 (d,  $J$  = 13.8 Hz,

1H), 2.75 (d,  $J = 13.8$  Hz, 1H), 2.36 (dd,  $J = 14.1, 7.2$  Hz, 1H), 2.19 (ddt,  $J = 14.1, 7.6$  Hz, 1.1 Hz, 1H), 1.03 (s, 3H);  $^{13}\text{C}$  NMR (125 MHz,  $\text{CDCl}_3$ ):  $\delta = 205.9$  (o), 136.6 (e), 133.0 (o), 130.2 (o, 2C), 128.2 (o, 2C), 126.6 (o), 118.8 (e), 50.0 (e), 41.7 (e), 39.9 (e), 18.5 (o); IR (neat):  $\tilde{\nu} = 3065$  (w), 3030 (w), 2977 (w), 2929 (w), 2713 (w), 1723 (s), 1640 (w), 1604 (w), 1497 (m), 1454 (m), 1417 (w), 1395 (w), 1373 (w), 1326 (w), 1181 (w), 1076 (w), 1031 (w), 995 (m), 917 (m), 861 (w), 809 (w), 782 (m), 740 (m), 701 (vs), 664 (w)  $\text{cm}^{-1}$ ; HRMS (CI( $\text{NH}_4$ )) calcd for ( $\text{C}_{13}\text{H}_{16}\text{O} + \text{NH}_4$ ): 206.1539; found: 206.1539; elemental analysis (%) calcd for  $\text{C}_{13}\text{H}_{16}\text{O}$ : C 82.94, H 8.57; found: C 83.00, H 8.75.

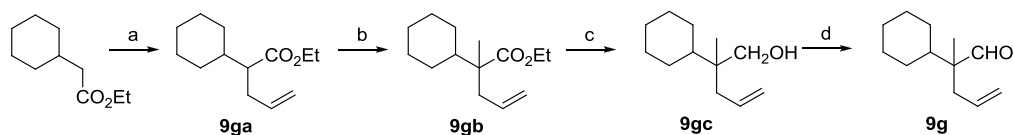

(a) i) LDA, THF,  $-78$   $^{\circ}\text{C}$ ; ii) allyl bromide,  $n\text{Bu}_4\text{NI}$ ,  $-78$   $^{\circ}\text{C}$  to rt, 62%. (b) i) LDA, THF,  $-78$   $^{\circ}\text{C}$ ; ii) MeI, 62%. (c)  $\text{LiAlH}_4$ ,  $\text{Et}_2\text{O}$ , 77%. (d)  $(\text{COCl})_2$ , DMSO,  $\text{Et}_3\text{N}$ ,  $\text{CH}_2\text{Cl}_2$ , 72%.

**Compound 9gb.** This compound was obtained from ethyl 2-cyclohexylpent-4-enoate (2.38 mmol, 500 mg) following the same procedure as for the preparation of **9bb**. Colourless oil (331 mg, 62%).

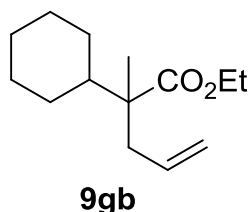

$^1\text{H}$  NMR (500 MHz,  $\text{CDCl}_3$ ):  $\delta = 5.74$ - $5.65$  (m, 1H), 5.05- $5.00$  (m, 2H), 4.13 (d,  $J = 7.2$  Hz, 1H), 4.11 (q,  $J = 7.1$  Hz, 2H), 2.40 (dd,  $J = 13.5, 6.9$  Hz, 1H), 2.16 (dd,  $J = 13.5, 7.8$  Hz, 1H), 1.82- $1.57$  (m, 5H), 1.49- $1.42$  (m, 1H), 1.25 (t,  $J = 7.1$  Hz, 3H), 1.27- $1.17$  (m, 2H), 1.16- $1.04$  (m, 2H), 1.02 (s, 3H), 1.02- $0.92$  (m, 1H);  $^{13}\text{C}$  NMR (125 MHz,  $\text{CDCl}_3$ ):  $\delta = 176.7$  (e), 134.7 (o), 117.5 (e), 60.0 (e), 49.8 (e), 45.3 (o), 41.8 (e), 28.5 (e), 27.0 (e), 26.8 (e, 2C), 26.6 (e), 16.8 (o), 14.3 (o); IR

(neat):  $\tilde{\nu} = 3078$  (w), 2980 (m), 2928 (s), 2854 (m), 1725 (vs), 1640 (w), 1449 (m), 1382 (m), 1366 (w), 1281 (m), 1214 (s), 1189 (s), 1139 (s), 1097 (m), 1061 (m), 1026 (m), 994 (w), 913 (m), 863 (w), 850 (w), 778 (w), 756 (w)  $\text{cm}^{-1}$ ; HRMS (CI( $\text{CH}_4$ )) calcd for ( $\text{C}_{14}\text{H}_{24}\text{O}_2 + \text{H}$ ): 225.1850; found: 225.1852; elemental analysis (%) calcd for  $\text{C}_{14}\text{H}_{24}\text{O}_2$ : C 74.95, H 10.89; found: C 74.99, H 10.72.

**Compound 9gc.** This compound was obtained from **9gb** (1.47 mmol, 330 mg) following the same procedure as for the preparation of **1b**. Colourless oil (208 mg, 77%).

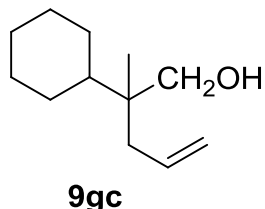

$^1\text{H}$  NMR (500 MHz,  $\text{CDCl}_3$ ):  $\delta = 5.89$  (ddt,  $J = 17.2, 9.9, 7.4$  Hz, 1H), 5.11- $5.03$  (m, 2H), 3.47 (dd,  $J = 11.2, 6.5$  Hz, 1H), 3.43 (dd,  $J = 11.1, 6.0$  Hz, 1H), 2.16- $2.05$  (m, 2H), 1.82- $1.62$  (m, 5H), 1.34 (tt,  $J = 17.9, 2.9$  Hz, 1H), 1.30- $1.25$  (m, 1H), 1.25- $1.17$  (m, 2H), 1.13 (tt,  $J = 12.6, 3.4$  Hz, 1H), 1.08- $0.96$  (m, 2H), 0.78 (s, 3H);  $^{13}\text{C}$  NMR (125 MHz,  $\text{CDCl}_3$ ):  $\delta = 136.0$  (o), 116.9 (e), 68.2 (e), 42.1 (o), 40.2 (e), 40.1 (e), 27.2 (e, 2C), 27.1 (e), 27.0 (e), 26.7 (e), 18.7 (o); IR (neat):  $\tilde{\nu} = 3363$  (br), 3074

(w), 2922 (vs), 2852 (s), 1638 (m), 1448 (m), 1415 (w), 1377 (w), 1270 (w), 1155 (w), 1028 (s), 997 (m), 909 (vs), 892 (m), 845 (m), 807 (w), 761 (w), 663 (w)  $\text{cm}^{-1}$ ; HRMS (CI( $\text{CH}_4$ )) calcd for ( $\text{C}_{12}\text{H}_{22}\text{O} + \text{H}$ ): 183.1744; found: 183.1742; elemental analysis (%) calcd for  $\text{C}_{12}\text{H}_{22}\text{O}$ : C 79.06, H 12.16; found: C 79.25, H 12.28.

**Compound 9g.** This compound was obtained from **9fb** (0.55 mmol, 100 mg) following the same procedure as for the preparation of **1**. Colourless oil (71 mg, 72%).

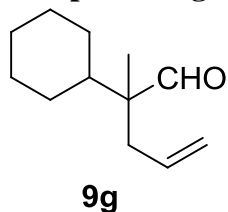

$^1\text{H}$  NMR (500 MHz,  $\text{CDCl}_3$ ):  $\delta = 9.49$  (s, 1H), 5.72- $5.61$  (m, 1H), 5.08- $5.01$  (m, 2H), 2.34 (dd,  $J = 14.1, 7.0$  Hz, 1H), 2.21 (dd,  $J = 14.1, 7.9$  Hz, 1H), 1.84- $1.64$  (m, 4H), 1.62- $1.48$  (m, 2H), 1.30- $1.18$  (m, 2H), 1.17- $0.98$  (m, 3H), 0.96 (s, 3H);  $^{13}\text{C}$  NMR (125 MHz,  $\text{CDCl}_3$ ):  $\delta = 207.1$  (o), 133.5 (o), 118.1 (e), 51.7 (e), 42.2 (o), 38.4 (e), 28.0 (e), 26.8

(e), 26.7 (e, 2C), 26.4 (e), 14.8 (o); IR (neat):  $\tilde{\nu} = 3078$  (w), 2978 (w), 2926 (s), 2854 (m), 2701 (w), 1722 (vs), 1640 (m), 1450 (m), 1417 (w), 1396 (w), 1375 (w), 1351 (w), 1272 (w), 1188 (w), 993 (m), 913 (s), 893 (w), 868 (w), 845 (m), 798 (w), 769 (w)  $\text{cm}^{-1}$ ; HRMS (CI( $\text{CH}_4$ )) calcd for ( $\text{C}_{12}\text{H}_{20}\text{O} + \text{H}$ ): 181.1587; found: 181.1589.

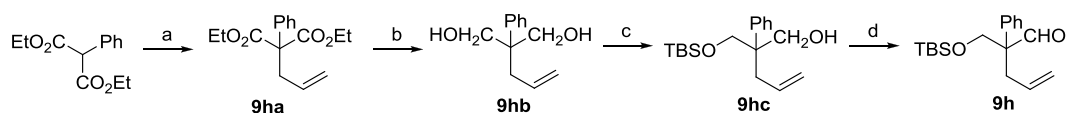

(a) NaH, allyl bromide, DMF, 83%. (b) LiAlH<sub>4</sub>, Et<sub>2</sub>O, 74%. (c) TBSCl, imidazole, DMF, 69%. (d) (COCl)<sub>2</sub>, DMSO, Et<sub>3</sub>N, CH<sub>2</sub>Cl<sub>2</sub>, 96%.

**Compound 9ha.** Under a N<sub>2</sub> atmosphere, sodium hydride (31.74 mmol, 1.27 g, 60% dispersion in oil) was suspended in DMF (106 mL) and cooled to 0 °C. Diethyl phenylmalonate (21.16 mmol, 4.57 mL) was added slowly *via* syringe and stirred at 0 °C for 10 minutes before adding allyl bromide (31.74 mmol, 2.85 mL), stirring for 1 hour. The reaction mixture was then quenched with a saturated aqueous solution of ammonium chloride and extracted with Et<sub>2</sub>O. The organic layer washed several times with water and then dried over MgSO<sub>4</sub>, filtered and concentrated. The crude oil was purified by flash column chromatography (petroleum ether/Et<sub>2</sub>O = 24:1), affording **9ha** as a colourless oil (4.86 g, 83%); <sup>1</sup>H NMR (500 MHz, CDCl<sub>3</sub>): δ = 7.44-7.39 (m, 2H), 7.36-7.25 (m, 3H), 5.76 (ddt, *J* = 17.1, 10.1, 7.1 Hz, 1H), 5.10-5.02 (m, 2H), 4.28-4.15 (m, 4H), 3.07 (dt, *J* = 7.2, 1.2 Hz, 2H), 1.24 (t, *J* = 7.1 Hz, 6H), in agreement with previously reported data.<sup>7</sup>

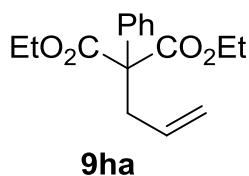

**Compound 9hb.** This compound was obtained from **9ha** (17.62 mmol, 4.86 g) following the same procedure as for the preparation of **1b**, except that 2.2 equiv. of LiAlH<sub>4</sub> (38.76 mmol, 1.47 g) in Et<sub>2</sub>O (100 mL) was used. White solid (2.51 g, 74%). <sup>1</sup>H NMR (500 MHz, CDCl<sub>3</sub>): δ = 7.41-7.36 (m, 4H), 7.29-7.24 (m, 1H), 5.54 (ddt, *J* = 17.2, 10.0, 7.2 Hz, 1H), 5.10-5.03 (m, 1H), 5.02-4.96 (m, 1H), 4.08 (dd, *J* = 11.0, 5.6 Hz, 2H), 3.94 (dd, *J* = 11.1, 6.4 Hz, 2H), 2.47 (dt, *J* = 7.3, 1.1 Hz, 2H), 2.10 (t, *J* = 5.8 Hz, 2H); <sup>13</sup>C NMR (125 MHz, CDCl<sub>3</sub>): δ = 141.0 (e), 133.7 (o), 128.7 (o, 2C), 127.0 (o, 2C), 126.7 (o), 117.9 (e), 68.1 (e, 2C), 47.1 (e), 38.8 (o); IR (neat):  $\tilde{\nu}$  = 3356 (br), 3062 (w), 2935 (w), 1639 (w), 1600 (w), 1581 (w), 1499 (m), 1467 (w), 1445 (m), 1416 (w), 1296 (w), 1267 (w), 1237 (w), 1149 (w), 1051 (m), 1031 (m), 1008 (m), 998 (m), 967 (w), 915 (m), 870 (w), 844 (w), 766 (m), 737 (m), 698 (vs), 674 (w) cm<sup>-1</sup>; HRMS (CI(NH<sub>4</sub>)) calcd for (C<sub>12</sub>H<sub>16</sub>O<sub>2</sub> + NH<sub>4</sub>): 210.1489; found: 210.1495.

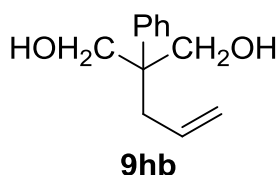

**Compound 9hc.** Under a N<sub>2</sub> atmosphere, **9hb** (13.06 mmol, 2.5 g) and imidazole (13.06 mmol, 889 mg) were dissolved in DMF (130 mL) and cooled to 0 °C. *tert*-Butyldimethylsilyl chloride (13.06 mmol, 1.97 g) was added in one batch and the reaction was stirred for 1 hour at room temperature. The reaction mixture was then quenched with a saturated aqueous solution of ammonium chloride and extracted with Et<sub>2</sub>O. The organic layer washed several times with water and then dried over MgSO<sub>4</sub>, filtered and concentrated. The crude oil was purified by flash column chromatography (petroleum ether/Et<sub>2</sub>O = 9:1), affording **9hc** as a colourless oil (2.76 g, 69%). <sup>1</sup>H NMR (500 MHz, CDCl<sub>3</sub>): δ = 7.36-7.31 (m, 4H), 7.25-7.20 (m, 1H), 5.51 (ddt, *J* = 17.1, 10.0, 7.2 Hz, 1H), 5.07-5.00 (m, 1H), 4.98-4.93 (m, 1H), 4.02 (d, *J* = 9.7 Hz, 1H), 4.00 (dd, *J* = 11.0, 5.5 Hz, 1H), 3.90 (dd, *J* = 11.1, 7.0 Hz, 1H), 3.86 (d, *J* = 9.8 Hz, 1H), 2.61 (dd, *J* = 6.8, 5.5 Hz, 1H), 2.53 (d, *J* = 7.3 Hz, 2H), 0.88 (s, 9H), 0.07 (s, 3H), 0.05 (s, 3H); <sup>13</sup>C NMR (125 MHz, CDCl<sub>3</sub>): δ = 141.6 (e), 133.9 (o), 128.2 (o, 2C), 126.9 (o, 2C), 126.3 (o), 117.5 (e), 68.4 (e, 2C), 46.8 (e), 38.0 (e), 25.7 (o, 3C), 18.0 (e), -5.7 (o), -5.8 (o); IR (neat):  $\tilde{\nu}$  = 3443 (br), 3063 (w), 2954 (m), 2929 (m), 2884 (w), 2857 (m), 1639 (w), 1602 (w), 1499 (w), 1472 (m), 1469 (w), 1413 (w), 1389 (w), 1362 (w), 1253 (m), 1090 (m), 1037 (w), 1006 (w), 939 (w), 914 (m), 833 (vs), 814 (w), 774 (s), 697 (s), 669 (m) cm<sup>-1</sup>; HRMS (CI(NH<sub>4</sub>)) calcd for (C<sub>18</sub>H<sub>30</sub>O<sub>2</sub>Si + H): 307.2088; found: 307.2097.

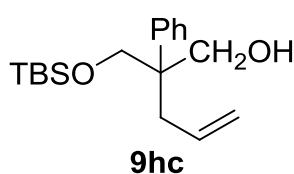

<sup>7</sup> D. Nečas, M. Turský, M. Kotora, *J. Am. Chem. Soc.* **2004**, *126*, 10222

**Compound 9h.** This compound was obtained from **9hc** (0.65 mmol, 200 mg) following the same procedure as for the preparation of **1**. Colourless oil (190 mg, 96%). <sup>1</sup>H NMR (500 MHz, CDCl<sub>3</sub>): δ = 9.59 (s, 1H), 7.39-7.34 (m, 2H), 7.31-7.26 (m, 1H), 7.18-7.14 (m, 2H), 5.51 (ddt, *J* = 17.1, 10.1, 7.3 Hz, 1H), 5.07-5.00 (ddt, *J* = 17.0, 2.1, 1.4 Hz, 1H), 5.02 (ddt, *J* = 10.1, 2.0, 1.0 Hz, 1H), 4.21 (d, *J* = 9.9 Hz, 1H), 4.02 (d, *J* = 9.9 Hz, 1H), 2.80-2.75 (m, 2H), 0.85 (s, 9H), 0.02 (s, 3H), -0.01 (s, 3H); <sup>13</sup>C NMR (125 MHz, CDCl<sub>3</sub>): δ = 201.5 (o), 136.6 (e), 133.0 (o), 128.7 (o, 2C), 127.5 (o, 2C), 127.4 (o), 118.5 (e), 63.5 (e), 58.8 (e), 35.2 (e), 25.7 (o, 3C), 18.1 (e), -5.77 (o), -5.79 (o); IR (neat):  $\tilde{\nu}$  = 3078 (w), 2955 (m), 2929 (m), 2886 (w), 2857 (m), 2710 (w), 1731 (m), 1641 (m), 1600 (m), 1497 (w), 1472 (m), 1464 (w), 1447 (w), 1415 (w), 1389 (w), 1362 (w), 1253 (m), 1169 (w), 1099 (s), 1020 (w), 1006 (w), 939 (w), 918 (m), 835 (vs), 815 (m), 776 (s), 757 (m), 738 (w), 698 (m), 671 (w) cm<sup>-1</sup>; HRMS (CI(NH<sub>4</sub>)) calcd for (C<sub>18</sub>H<sub>28</sub>O<sub>2</sub>Si + H): 305.1931; found: 305.1929.

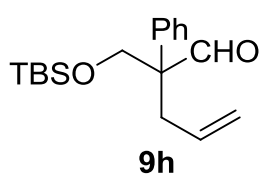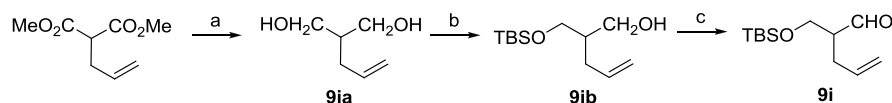

(<sup>a</sup>) LiAlH<sub>4</sub>, Et<sub>2</sub>O, 63%. (<sup>b</sup>) NaH, TBSCl, THF, 83%. (<sup>d</sup>) (COCl)<sub>2</sub>, DMSO, Et<sub>3</sub>N, CH<sub>2</sub>Cl<sub>2</sub>, 64%.

**Compound 9ia.** Under a N<sub>2</sub> atmosphere, LiAlH<sub>4</sub> (8.71 mmol, 331 mg) was suspended in Et<sub>2</sub>O (14 mL) and cooled to 0 °C. Dimethyl allylmalonate (5.81 mmol, 934 μL) was added *via* syringe and stirred at 0 °C for 15 minutes, before adding an additional LiAlH<sub>4</sub> (8.71 mmol, 331 mg) at 0 °C. The reaction was stirred until complete by TLC. The reaction mixture was quenched carefully at 0 °C with a saturated aqueous solution of sodium sulfate dropwise. The white precipitate was filtered over celite pad, the filtrate was evaporated under reduced pressure and the crude material was purified by flash chromatography (petroleum ether/Et<sub>2</sub>O = 1:2) afforded **9ia** (429 mg, 63%).<sup>8</sup>

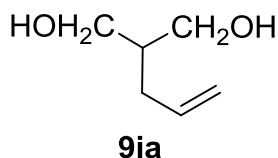

**Compound 9ib.** Under a N<sub>2</sub> atmosphere, sodium hydride (4.03 mmol, 161 mg, 60% in oil) was suspended in THF (37 mL) and cooled to 0 °C. **9ia** (3.66 mmol, 425 mg) was added and stirred for 15 minutes before adding *tert*-Butyldimethylsilyl chloride (3.66 mmol, 552 mg) in one batch and stirring until complete by TLC at room temperature. The reaction was quenched with a saturated aqueous solution of ammonium chloride, extracted with Et<sub>2</sub>O and the organic layer was dried over MgSO<sub>4</sub>, filtered and concentrated. The crude oil was purified by flash column chromatography (petroleum ether/Et<sub>2</sub>O = 9:1), affording **9ib** as a colourless oil (700 mg, 83%). <sup>1</sup>H NMR (500 MHz, CDCl<sub>3</sub>): δ = 5.78 (ddt, *J* = 17.1, 10.1, 7.1 Hz, 1H), 5.08-5.01 (m, 2H), 3.79 (ddd, *J* = 9.9, 4.2, 0.7 Hz, 1H), 3.77-3.72 (m, 1H), 3.65 (ddd, *J* = 10.9, 6.9, 4.7 Hz, 1H), 3.62 (dd, *J* = 9.9, 7.2 Hz, 1H), 2.70 (dd, *J* = 6.5, 4.8 Hz, 1H), 2.05 (tt, *J* = 10.6, 1.3 Hz, 2H), 1.87-1.79 (m, 1H), 0.90 (s, 9H), 0.07 (s, 6H); <sup>13</sup>C NMR (125 MHz, CDCl<sub>3</sub>): δ = 136.3 (o), 116.2 (e), 66.1 (e), 65.6 (e), 41.8 (o), 32.3 (e), 25.8 (o, 3C), 18.1 (e), -5.7 (o), -5.9 (o); IR (neat):  $\tilde{\nu}$  = 3347 (br), 3078 (w), 2954 (m), 2929 (m), 2885 (w), 2857 (m), 1641 (w), 1471 (m), 1441 (w), 1413 (w), 1389 (w), 1361 (w), 1252 (m), 1089 (m), 1038 (m), 1006 (w), 993 (w), 938 (w), 912 (m), 875 (w), 832 (vs), 813 (w), 773 (s), 668 (m) cm<sup>-1</sup>; HRMS (CI(NH<sub>4</sub>)) calcd for (C<sub>12</sub>H<sub>26</sub>O<sub>2</sub>Si + H): 231.1775; found: 231.1782.

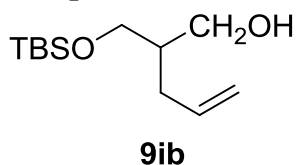

<sup>8</sup> K. Mori, N. Chiba, *Liebigs Ann. Chemie* **1989**, 957



**Compound 9i.** This compound was obtained from **9ib** (0.87 mmol, 200 mg) following the same procedure as for the preparation of **1**. Colourless oil (127 mg, 64%). <sup>1</sup>H NMR (500 MHz, CDCl<sub>3</sub>): δ = 9.74 (d, *J* = 1.7 Hz, 1H), 5.81-5.72 (m, 1H), 5.12-5.04 (m, 2H), 3.90 (dd, *J* = 10.3, 4.6 Hz, 1H), 3.83 (dd, *J* = 10.2, 5.8 Hz, 1H), 2.53-2.43 (m, 2H), 2.32-2.23 (m, 1H), 0.87 (s, 9H), 0.05 (s, 6H); <sup>13</sup>C NMR (125 MHz, CDCl<sub>3</sub>): δ = 204.1 (o), 135.0 (o), 117.2 (e), 61.2 (e), 53.5 (o), 29.7 (e), 25.8 (o, 3C), 18.2 (e), -5.56 (o), -5.58 (o); IR (neat):  $\tilde{\nu}$  = 2954 (m), 2929 (m), 2886 (w), 2857 (m), 1713 (m), 1643 (w), 1472 (m), 1441 (w), 1414 (w), 1389 (w), 1361 (w), 1253 (m), 1187 (w), 1100 (br, m), 1006 (w), 992 (w), 938 (w), 916 (m), 834 (vs), 814 (w), 776 (s), 668 (m) cm<sup>-1</sup>; HRMS (CI(NH<sub>4</sub>)) calcd for (C<sub>12</sub>H<sub>24</sub>O<sub>2</sub>Si + H): 229.1618; found: 229.1629.

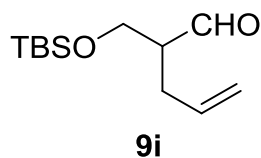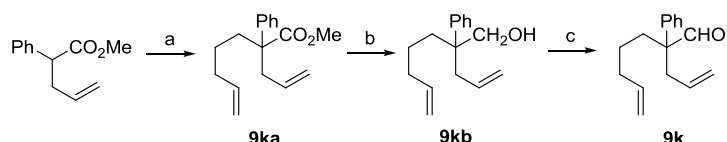

(<sup>a</sup>) i) NaHMDS, DMF ; ii) bromopent-1-ene, 69%. (<sup>b</sup>) LiAlH<sub>4</sub>, Et<sub>2</sub>O, 87%. (<sup>d</sup>) (COCl)<sub>2</sub>, DMSO, Et<sub>3</sub>N, CH<sub>2</sub>Cl<sub>2</sub>, 93%.

**Compound 9ka.** Under a N<sub>2</sub> atmosphere, solid NaHMDS (3.16 mmol, 579 mg) was dissolved in DMF (8 mL) and cooled to 0 °C. Methyl 2-phenylpent-4-enoate<sup>4</sup> (1.58 mmol, 300 mg) was added *via* syringe and stirred at room temperature for 15 minutes before adding bromopent-1-ene (2.37 mmol, 254 μL) and stirring at room temperature for 16 hours. The reaction was quenched with a saturated aqueous solution of ammonium chloride and extracted with Et<sub>2</sub>O. The organic layer was washed several times with water, then dried over MgSO<sub>4</sub>, filtered and concentrated. The crude oil was purified by flash column chromatography (petroleum ether/Et<sub>2</sub>O = 99:1), affording **9ka** as a colourless oil (279 mg, 69%). <sup>1</sup>H NMR (500 MHz, CDCl<sub>3</sub>): δ = 7.35-7.29 (m, 2H), 7.26-7.21 (m, 3H), 5.74 (ddt, *J* = 17.0, 10.3, 6.7 Hz, 1H), 5.51 (dddd, *J* = 17.0, 10.2, 7.7, 6.8 Hz, 1H), 5.08-5.01 (m, 2H), 4.98 (dq, *J* = 17.1, 1.7 Hz, 1H), 4.93 (ddt, *J* = 10.1, 2.1, 1.1 Hz, 1H), 3.64 (s, 3H), 2.86-2.79 (m, 1H), 2.78-2.71 (m, 1H), 2.08-1.94 (m, 4H), 1.28-1.12 (m, 2H); <sup>13</sup>C NMR (125 MHz, CDCl<sub>3</sub>): δ = 175.9 (e), 142.2 (e), 138.3 (o), 133.5 (o), 128.3 (o, 2C), 126.7 (o), 126.4 (o, 2C), 118.2 (e), 114.7 (e), 53.7 (e), 51.9 (o), 39.2 (e), 34.0 (e), 33.8 (e), 23.2 (e); IR (neat):  $\tilde{\nu}$  = 3076 (w), 2978 (w), 2949 (w), 1729 (vs), 1640 (m), 1600 (w), 1497 (m), 1446 (m), 1433 (w), 1416 (w), 1208 (m), 1137 (m), 1074 (w), 1034 (w), 993 (m), 912 (s), 832 (w), 778 (w), 736 (m), 698 (vs) cm<sup>-1</sup>; HRMS (CI(CH<sub>4</sub>)) calcd for (C<sub>17</sub>H<sub>22</sub>O<sub>2</sub> + H): 259.1693; found: 259.1693.

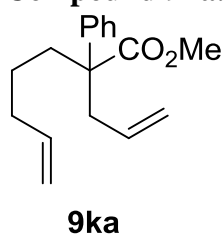

**Compound 9kb.** This compound was obtained from **9ka** (1.14 mmol, 278 mg) following the same procedure as for the preparation of **1b**. Colourless oil (227 mg, 87%). <sup>1</sup>H NMR (500 MHz, CDCl<sub>3</sub>): δ = 7.39-7.29 (m, 4H), 7.25-7.20 (m, 1H), 5.71 (ddt, *J* = 17.2, 15.2, 7.0 Hz, 2H), 5.16-5.09 (m, 1H), 5.08-5.03 (m, 1H), 4.99-4.94 (m, 1H), 4.94-4.89 (m, 1H), 3.81-3.73 (m, 2H), 2.62 (dd, *J* = 13.9, 7.1 Hz, 1H), 2.48 (dd, *J* = 14.0, 7.5 Hz, 1H), 2.03-1.95 (m, 2H), 1.71-1.63 (m, 2H), 1.31-1.11 (m, 3H); <sup>13</sup>C NMR (125 MHz, CDCl<sub>3</sub>): δ = 144.0 (e), 138.6 (o), 134.6 (o), 128.4 (o, 2C), 126.7 (o, 2C), 126.1 (o), 117.7 (e), 114.6 (e), 68.0 (e), 45.8 (e), 38.9 (e), 34.5 (e), 34.2 (e), 22.6 (e); IR (neat):  $\tilde{\nu}$  = 3397 (br), 3074 (w), 2976 (w), 2935 (m), 1829 (w), 1639 (m), 1600 (w), 1580 (w), 1498 (w), 1459 (w), 1444 (m), 1415 (w), 1385 (w), 1328 (w), 1157 (w), 1043 (m), 994 (m), 909 (s), 829 (w), 766 (m), 697 (vs), 672 (w), 663 (w) cm<sup>-1</sup>; HRMS (CI(NH<sub>4</sub>)) calcd for (C<sub>16</sub>H<sub>22</sub>O + NH<sub>4</sub>): 248.2009; found: 248.2014.

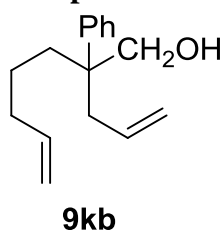

**Compound 9k.** This compound was obtained from **9kb** (1.04 mmol, 225 mg) following the same procedure as for the preparation of **1**. Colourless oil (206 mg, 93%). <sup>1</sup>H NMR (500 MHz, CDCl<sub>3</sub>): δ = 9.50 (s, 1H), 7.41-7.35 (m, 2H), 7.31-7.27 (m, 1H), 7.24-7.19 (m, 2H), 5.73 (ddt, *J* = 17.0, 10.3, 6.7 Hz, 1H), 5.53 (ddt, *J* = 17.1, 10.1, 7.2 Hz, 1H), 5.10-5.02 (m, 2H), 4.99 (dq, *J* = 17.1, 1.6 Hz, 1H), 4.95 (ddt, *J* = 10.2, 2.0, 1.2 Hz, 1H), 2.78-2.17 (m, 1H), 2.71 (m, 1H), 2.07-2.01 (m, 2H), 1.99-1.86 (m, 2H), 1.31-1.16 (m, 2H); <sup>13</sup>C NMR (125 MHz, CDCl<sub>3</sub>): δ = 202.2 (o), 138.5 (e), 138.1 (o), 132.8 (o), 128.8 (o, 2C), 127.5 (o, 2C), 127.3 (o), 118.4 (e), 114.9 (e), 57.0 (e), 36.7 (e), 34.0 (e), 31.4 (e), 22.8 (e); IR (neat):  $\tilde{\nu}$  = 3077 (w), 2978 (w), 2940 (w), 2864 (w), 2708 (w), 1722 (s), 1640 (m), 1599 (w), 1581 (w), 1495 (m), 1459 (w), 1446 (m), 1417 (w), 1386 (w), 1321 (w), 1078 (w), 1032 (w), 993 (m), 912 (s), 825 (w), 760 (m), 698 (vs) cm<sup>-1</sup>; HRMS (CI(NH<sub>4</sub>)) calcd for (C<sub>16</sub>H<sub>20</sub>O + NH<sub>4</sub>): 246.1852; found: 246.1854.

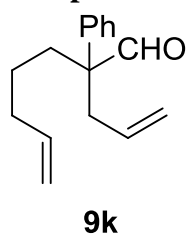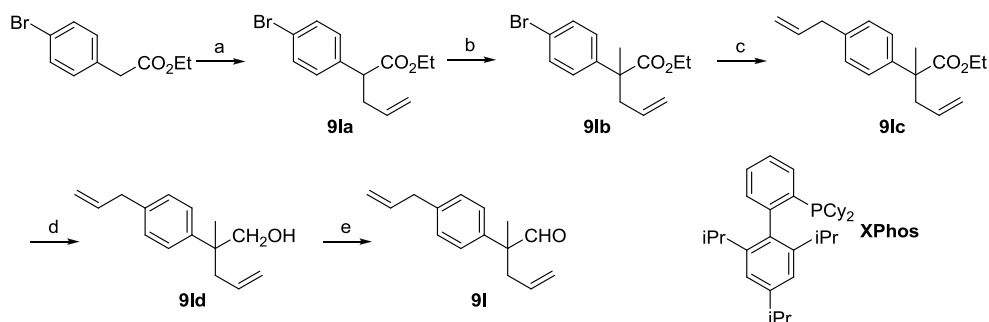

(a) i) NaH, DMF; ii) allyl bromide, 70%. (b) i) NaH, DMF, MeI, 69%. (c) Pd(OAc)<sub>2</sub>, XPhos, CsF, allyltributylstannane, dimethoxy-ethane, 80 °C, 89%. (d) LiAlH<sub>4</sub>, Et<sub>2</sub>O, 73%. (e) (COCl)<sub>2</sub>, DMSO, Et<sub>3</sub>N, CH<sub>2</sub>Cl<sub>2</sub>, 93%.

**Compound 9la.** Under a N<sub>2</sub> atmosphere, NaH (6.17 mmol, 247 mg, 60% dispersion in oil) was suspended in DMF (62 mL) and the mixture was cooled to 0 °C. Ethyl 4-bromophenylacetate (6.17 mmol, 1.50 g) was added and stirred for 15 minutes before adding allyl bromide (6.17 mmol, 554 μL) at 0 °C. The reaction was stirred for 1 hour, before quenching with saturated ammonium chloride, extracting with Et<sub>2</sub>O and washing the organic layer several times with water. The organic layer was then dried with MgSO<sub>4</sub>, filtered and concentrated. The crude was purified by flash column chromatography (petroleum ether/Et<sub>2</sub>O = 50:1), affording **9la** as a colourless oil (1.22 g, 70%). <sup>1</sup>H NMR (500 MHz, CDCl<sub>3</sub>): δ = 7.47-7.42 (m, 2H), 7.21-7.17 (m, 2H), 5.69 (ddt, *J* = 17.1, 10.2, 6.8 Hz, 1H), 5.06 (dq, *J* = 17.1, 1.6 Hz, 1H), 5.01 (ddt, *J* = 10.2, 2.0, 1.0 Hz, 1H), 4.18-4.05 (m, 2H), 3.58 (dd, *J* = 8.1, 7.4 Hz, 1H), 2.79 (dddt, *J* = 8.3, 14.3, 7.1, 1.2 Hz, 1H), 2.51-2.44 (m, 1H), 1.21 (t, *J* = 7.1 Hz, 3H), in agreement with previously reported data.<sup>9</sup>

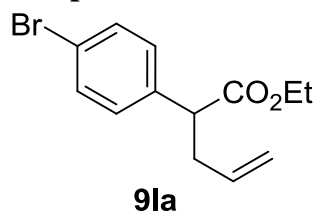

**Compound 9lb.** Under a N<sub>2</sub> atmosphere, sodium hydride (7.06 mmol, 282 mg, 60% dispersion in oil) was suspended in DMF (18 mL) and the mixture cooled to 0 °C. **9la** (3.53 mmol, 1.0 g) was added and stirred for 15 minutes before adding methyl iodide (7.06 mmol, 440 μL) at 0 °C. The reaction was stirred for 16 hours, before quenching with saturated ammonium chloride, extracting with Et<sub>2</sub>O and washing the organic layer several times with water. The organic layer was then dried with MgSO<sub>4</sub>, filtered and concentrated. The crude was purified by flash column chromatography (petroleum ether/Et<sub>2</sub>O = 50:1), affording **9lb** as a colourless oil (723 mg, 69%). <sup>1</sup>H NMR (500 MHz, CDCl<sub>3</sub>): δ = 7.46-7.42 (m, 2H), 7.21-7.16 (m, 2H), 5.63-5.53 (m, 1H), 5.09-5.03 (m, 2H), 4.12 (q, *J* = 7.1 Hz, 2H), 2.78 (dd, *J* = 13.7, 7.4 Hz, 1H), 2.66-2.59 (m, 1H), 1.51 (s, 3H), 1.19 (t, *J* = 7.1 Hz, 3H); <sup>13</sup>C NMR (125 MHz, CDCl<sub>3</sub>): δ = 175.2 (e), 142.4 (e), 134.5 (o), 131.4 (o, 2C), 127.9 (o, 2C), 120.7 (e), 118.7 (e), 61.0 (e), 52.2 (o), 43.6 (e), 22.5 (o), 14.0 (o); IR (neat):  $\tilde{\nu}$  = 3077 (w), 2979 (m),

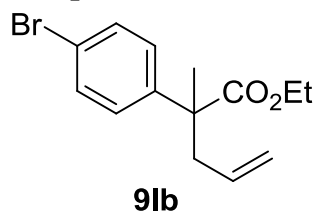

<sup>9</sup> H. Cai, Z. Yuan, W. Zhu, G. Zhu, *Chem. Commun.* **2011**, 47, 8682

2939 (w), 1725 (vs), 1640 (w), 1590 (w), 1490 (m), 1461 (w), 1397 (m), 1377 (w), 1288 (w), 1228 (s), 1142 (s), 1117 (w), 1082 (s), 1008 (s), 958 (w), 917 (s), 858 (w), 821 (s), 773 (w), 752 (m), 726 (w), 715 (w), 695 (w), 667 (w)  $\text{cm}^{-1}$ ; HRMS (CI(NH<sub>4</sub>)) calcd for (C<sub>14</sub>H<sub>17</sub><sup>79</sup>BrO<sub>2</sub> + H): 297.0485; found: 297.0494.

**Compound 9lc.** Pd(OAc)<sub>2</sub> (0.034 mmol, 7.6 mg), XPhos (0.067 mmol, 32 mg) and cesium fluoride (1.48 mmol, 225 mg) were added to a two-neck flask which was equipped with a reflux condenser and then flushed with N<sub>2</sub>. **9lb** (0.67 mmol, 200 mg) in dimethoxy-ethane (6.7 mL) and allyltributylstannane (0.74 mmol, 229  $\mu\text{L}$ ) were syringed into flask and the mixture was heated at 80 °C for 18 hours. The mixture was cooled to room temperature and concentrated. Et<sub>2</sub>O was added to the residue thus obtained and after filtration over celite, the filtrate

was concentrated. Purification by flash column chromatography (pentane/Et<sub>2</sub>O = 99:1) afforded **9lc** as a colourless oil (155 mg, 89%). <sup>1</sup>H NMR (500 MHz, CDCl<sub>3</sub>):  $\delta$  = 7.25-7.21 (m, 2H), 7.17-7.13 (m, 2H), 6.01-5.92 (m, 1H), 5.62 (ddt,  $J$  = 17.1, 10.1, 7.0 Hz, 1H), 5.11-5.02 (m, 4H), 4.13 (q,  $J$  = 7.1 Hz, 2H), 3.37 (d,  $J$  = 6.8 Hz, 2H), 2.82 (dd,  $J$  = 13.7, 7.3 Hz, 1H), 2.63 (dd,  $J$  = 13.7, 7.1 Hz, 1H), 1.51 (s, 3H), 1.19 (t,  $J$  = 7.1 Hz, 3H); <sup>13</sup>C NMR (125 MHz, CDCl<sub>3</sub>):  $\delta$  = 175.7 (e), 141.2 (e), 138.4 (e), 137.2 (o), 134.2 (o), 128.4 (o, 2C), 126.0 (o, 2C), 118.2 (e), 115.8 (e), 60.7 (e), 52.0 (o), 43.7 (e), 39.7 (e), 22.6 (o), 14.0 (o); IR (neat):  $\tilde{\nu}$  = 3078 (w), 2979 (m), 2938 (w), 1726 (vs), 1639 (m), 1513 (m), 1459 (w), 1434 (w), 1416 (w), 1377 (w), 1280 (w), 1229 (m), 1142 (s), 1096 (m), 1019 (m), 994 (m), 957 (w), 913 (s), 857 (w), 841 (w), 814 (w), 772 (w), 726 (w), 699 (w), 662 (w)  $\text{cm}^{-1}$ ; HRMS (CI(NH<sub>4</sub>)) calcd for (C<sub>17</sub>H<sub>22</sub>O<sub>2</sub> + H): 259.1693; found: 259.1703.

**Compound 9ld.** This compound was obtained from **9lc** (0.59 mmol, 153 mg) following the same procedure as for the preparation of **1b**. Colourless oil (94 mg, 73%). <sup>1</sup>H NMR (500 MHz, CDCl<sub>3</sub>):  $\delta$  = 7.31-7.27 (m, 2H), 7.20-7.16 (m, 2H), 5.97 (ddt,  $J$  = 17.1, 10.0, 6.9 Hz, 1H), 5.60 (ddt,  $J$  = 17.1, 10.0, 7.3 Hz, 1H), 5.12-4.96 (m, 4H), 3.73 (d,  $J$  = 10.9 Hz, 1H), 3.59 (d,  $J$  = 11.0 Hz, 1H), 3.38 (d,  $J$  = 6.7 Hz, 2H), 2.55 (dd,  $J$  = 13.7, 6.6 Hz, 1H), 2.35 (dd,  $J$  = 13.8, 8.1 Hz, 1H), 1.32 (s, 3H), 1.20 (br s, 1H(OH)); <sup>13</sup>C NMR (125 MHz, CDCl<sub>3</sub>):  $\delta$  = 142.2 (e), 137.9 (e), 137.3 (o), 134.6 (o), 128.6 (o, 2C), 126.7 (o, 2C), 17.5 (e), 115.8 (e), 71.7 (e), 42.9 (e, 2C), 39.7 (e), 21.9; IR (neat):  $\tilde{\nu}$  = 3392 (br), 3077 (w), 2977 (w), 2913 (w), 2247 (w), 1638 (m), 1513 (w), 1467 (w), 1434 (w), 1415 (w), 1373 (w), 1296 (w), 1031 (m), 1018 (m), 994 (m), 906 (vs), 838 (w), 807 (w), 729 (vs)  $\text{cm}^{-1}$ ; HRMS (CI(NH<sub>4</sub>)) calcd for (C<sub>15</sub>H<sub>20</sub>O + NH<sub>4</sub>): 234.1852; found: 234.1861.

**Compound 9l.** This compound was obtained from **9kb** (0.43 mmol, 92 mg) following the same procedure as for the preparation of **1**. Colourless oil (85 mg, 93%). <sup>1</sup>H NMR (500 MHz, CDCl<sub>3</sub>):  $\delta$  = 9.50 (s, 1H), 7.24-7.16 (m, 4H), 6.01-5.91 (m, 1H), 5.55 (ddt,  $J$  = 17.1, 10.0, 7.2 Hz, 1H), 5.11-5.01 (m, 4H), 3.38 (d,  $J$  = 6.7 Hz, 2H), 2.68 (dd,  $J$  = 14.1, 6.8 Hz, 1H), 2.62 (dd,  $J$  = 14.1, 7.7 Hz, 1H), 1.43 (s, 3H); <sup>13</sup>C NMR (125 MHz, CDCl<sub>3</sub>):  $\delta$  = 201.9 (o), 139.2 (e), 137.1 (e), 137.0 (o), 133.2 (o), 129.0 (o, 2C), 127.2 (o, 2C), 118.5 (e), 116.0 (e), 53.3 (e), 40.5 (e), 39.7 (e), 18.8 (o); IR (neat):  $\tilde{\nu}$  = 3078 (w), 2978 (w), 2916 (w), 2805 (w), 2708 (w), 1722 (vs), 1639 (m), 1513 (m), 1456 (w), 1433 (w), 1416 (w), 1388 (w), 1371 (w), 1273 (w), 1189 (w), 1119 (w), 1077 (w), 1019 (m), 993 (m), 912 (vs), 841 (m), 804 (m), 733 (w), 714 (w), 660  $\text{cm}^{-1}$ ; HRMS (CI(NH<sub>4</sub>)) calcd for (C<sub>15</sub>H<sub>18</sub>O + NH<sub>4</sub>): 232.1696; found: 232.1698.

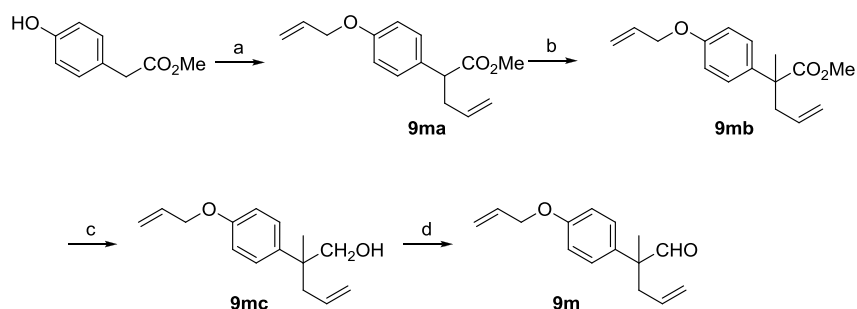

(a) i) NaH, THF; ii) allyl bromide, 82%. (b) i) NaH, DMF, MeI, 77%. (c) LiAlH<sub>4</sub>, Et<sub>2</sub>O, 97%. (d) (COCl)<sub>2</sub>, DMSO, Et<sub>3</sub>N, CH<sub>2</sub>Cl<sub>2</sub>, 87%.

**Compound 9ma.** Under a N<sub>2</sub> atmosphere, NaH (6.02 mmol, 282 mg, 60% dispersion in oil) was suspended in THF (30 mL) and the mixture was cooled to 0 °C. Methyl 4-hydroxyphenylacetate (3.01 mmol, 500 mg) was added and the mixture was stirred for 15 minutes before adding allyl bromide (6.02 mmol, 521 μL) at 0 °C. The mixture was stirred for 16 hours, before quenching with a saturated aqueous solution of ammonium chloride, extracting with Et<sub>2</sub>O and washing several times the organic layer with water. The organic layer was then dried over MgSO<sub>4</sub>, filtered and concentrated.

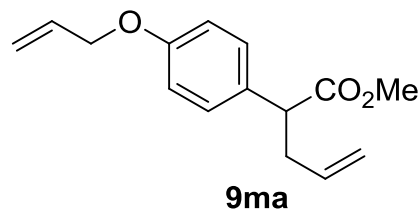

Purification by flash column chromatography (petroleum ether/Et<sub>2</sub>O = 99:1), afforded **9ma** as colourless oil (612 mg, 82%). <sup>1</sup>H NMR (500 MHz, CDCl<sub>3</sub>): δ = 7.24-7.19 (m, 2H), 6.89-6.84 (m, 2H), 6.05 (ddt, *J* = 17.2, 10.6, 5.3 Hz, 1H), 5.71 (ddt, *J* = 17.1, 10.2, 6.8 Hz, 1H), 5.40 (dq, *J* = 17.3, 1.6 Hz, 1H), 5.28 (dq, *J* = 10.6, 1.4 Hz, 1H), 5.06 (ddt, *J* = 17.1, 1.6, 1.5 Hz, 1H), 5.00 (ddt, *J* = 10.1, 2.0, 1.0 Hz, 1H), 4.52 (dt, *J* = 5.3, 1.5 Hz, 2H), 3.65 (s, 3H), 3.59 (dd, *J* = 8.5, 7.1 Hz, 1H), 2.89-2.74 (m, 1H), 2.53-2.44 (m, 1H), <sup>13</sup>C NMR (125 MHz, CDCl<sub>3</sub>): δ = 174.1 (e), 157.8 (e), 135.3 (o), 133.2 (o), 130.8 (e), 128.9 (o, 2C), 117.6 (e), 116.9 (e), 114.8 (o, 2C), 68.8 (e), 51.9 (o), 50.5 (o), 37.6 (e); IR (neat):  $\tilde{\nu}$  = 3079 (w), 2982 (w), 2951 (w), 1732 (vs), 1642 (w), 1610 (m), 1583 (w), 1509 (vs), 1456 (w), 1435 (m), 1343 (w), 1300 (w), 1242 (s), 1223 (s), 1198 (m), 1178 (w), 1159 (vs), 1119 (m), 1021 (m), 994 (s), 917 (s), 830 (s), 793 (m), 750 (w), 708 (w) cm<sup>-1</sup>; HRMS (CI(NH<sub>4</sub>)) calcd for (C<sub>15</sub>H<sub>18</sub>O<sub>3</sub> + H): 247.1329; found: 247.1330.

**Compound 9mb.** This compound was obtained from **9ma** (4.07 mmol, 1.0 g) following the same procedure as for the preparation of **9mb**. Colourless oil (817 mg, 77%).

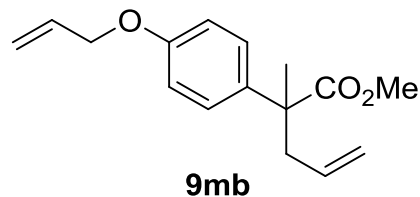

<sup>1</sup>H NMR (500 MHz, CDCl<sub>3</sub>): δ = 7.25-7.20 (m, 2H), 6.89-6.84 (m, 2H), 6.05 (ddt, *J* = 17.2, 10.6, 5.3 Hz, 1H), 5.60 (ddt, *J* = 17.1, 10.0, 7.2 Hz, 1H), 5.44-5.38 (m, 1H), 5.30-5.26 (m, 1H), 5.09-5.01 (m, 2H), 4.54-4.50 (m, 2H), 3.65 (s, 3H), 2.80 (dd, *J* = 13.7, 7.4 Hz, 1H), 2.62 (dd, *J* = 13.8, 7.0 Hz, 1H), 1.51 (s, 3H); <sup>13</sup>C NMR (125 MHz, CDCl<sub>3</sub>): δ = 176.4 (e), 157.3 (e), 135.5 (e), 134.1 (o), 133.3 (o), 127.0 (o, 2C), 118.3 (e), 117.6 (e), 114.5 (o, 2C), 68.7 (e), 52.0 (o), 49.2 (e), 43.8 (e), 22.6 (o); IR (neat):  $\tilde{\nu}$  = 3079 (w), 2980 (w), 2950 (w), 1727 (s), 1640 (w), 1609 (m), 1581 (w), 1510 (s), 1458 (m), 1434 (m), 1377 (w), 1287 (w), 1230 (s), 1184 (s), 1143 (m), 1119 (w), 1097 (w), 1022 (m), 995 (s), 910 (s), 828 (s), 806 (w), 774 (w), 730 (vs), 664 cm<sup>-1</sup>; HRMS (CI(NH<sub>4</sub>)) calcd for (C<sub>16</sub>H<sub>20</sub>O<sub>3</sub> + H): 261.1485; found: 261.1491.

**Compound 9mc.** This compound was obtained from **9mb** (0.35 mmol, 90 mg) following the same procedure as for the preparation of **1b**. Colourless oil (77 mg, 97%).

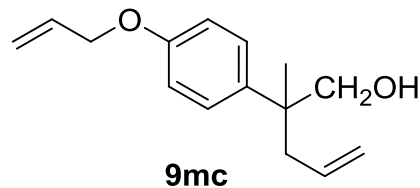

<sup>1</sup>H NMR (500 MHz, CDCl<sub>3</sub>): δ = 7.29-7.25 (m, 2H), 6.92-6.88 (m, 2H), 6.06 (ddt, *J* = 17.2, 10.6, 5.3 Hz, 1H), 5.60 (dddd, *J* = 17.0, 10.2, 7.9, 6.7 Hz, 1H), 5.42 (dq, *J* = 17.2, 1.6 Hz, 1H), 5.29 (dq, *J* = 10.5, 1.4 Hz, 1H), 5.06-5.01 (m, 1H), 5.00-4.97 (m, 1H), 4.53 (dt, *J* = 5.3, 1.5 Hz, 2H), 3.70 (d, *J* = 10.9 Hz, 1H), 3.57 (d, *J* = 10.9 Hz, 1H), 2.55-2.49 (m,

1H), 2.36-2.30 (m, 1H), 1.31 (s, 3H); <sup>13</sup>C NMR (125 MHz, CDCl<sub>3</sub>): δ = 156.9 (e), 136.6 (e), 134.6 (o), 133.3 (o), 127.7 (o, 2C), 117.6 (e), 117.4 (e), 114.6 (o, 2C), 71.8 (e), 68.8 (e), 43.0 (e), 42.5 (e), 21.9 (o); IR (neat):  $\tilde{\nu}$  = 3382 (br), 3074 (w), 2974 (w), 2920 (w), 2873 (w), 1638 (w), 1608 (m), 1579 (w), 1510 (vs), 1457 (m), 1425 (w), 1372 (w), 1295 (m), 1243 (s), 1185 (s), 1154 (w), 1118 (w), 1023 (s), 996 (s), 913 (s), 826 (s), 735 (m), 701 (w), 667 (w) cm<sup>-1</sup>; HRMS (CI(NH<sub>4</sub>)) calcd for (C<sub>15</sub>H<sub>20</sub>O<sub>2</sub> + NH<sub>4</sub>): 250.1802; found: 250.1805.

**Compound 9m.** This compound was obtained from **9kb** (0.86 mmol, 200 mg) following the same

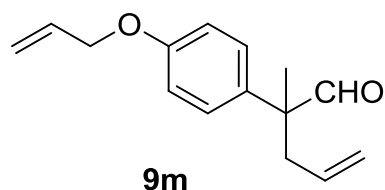

procedure as for the preparation of **1**. Colourless oil (172 mg, 87%). <sup>1</sup>H NMR (500 MHz, CDCl<sub>3</sub>): δ = 9.46 (s, 1H), 7.18-7.13 (m, 2H), 6.95-6.90 (m, 2H), 6.05 (ddt, *J* = 17.3, 10.5, 5.3 Hz, 1H), 5.55 (dddd, *J* = 17.0, 10.1, 7.6, 6.9 Hz, 1H), 5.41 (dq, *J* = 17.2, 1.6 Hz, 1H), 5.29 (dq, *J* = 10.5, 1.4 Hz, 1H), 5.08-5.01 (m, 2H), 4.53 (dt, *J* = 5.3, 1.5 Hz, 2H), 2.69-2.63 (m, 1H), 2.59 (ddt, *J* = 14.1, 7.7, 1.0 Hz, 1H), 1.41 (s, 3H); <sup>13</sup>C NMR (125

MHz, CDCl<sub>3</sub>): δ = 201.8 (o), 157.8 (e), 133.3 (o), 133.1 (o), 131.3 (e), 128.3 (o, 2C), 118.4 (e), 117.7 (e), 115.0 (o, 2C), 68.8 (e), 52.9 (e), 40.5 (e), 18.8 (o); IR (neat):  $\tilde{\nu}$  = 3078 (w), 2978 (w), 2931 (w), 2805 (w), 2709 (w), 1720 (s), 1640 (w), 1606 (m), 1579 (w), 1510 (vs), 1457 (m), 1425 (w), 1387 (w), 1371 (w), 1297 (m), 1247 (s), 1184 (s), 1155 (w), 1118 (w), 1020 (m), 995 (s), 916 (s), 826 (s), 728 (m) cm<sup>-1</sup>; HRMS (CI(NH<sub>4</sub>)) calcd for (C<sub>15</sub>H<sub>18</sub>NO<sub>2</sub> + NH<sub>4</sub>): 248.1645; found: 248.1650.

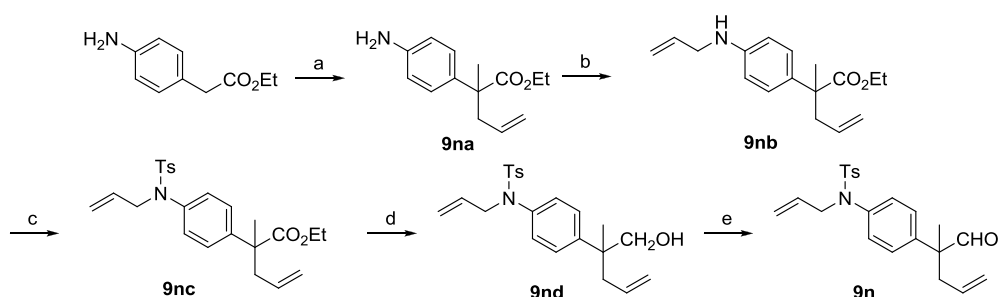

(a) i) Benzaldehyde, MgSO<sub>4</sub>, CH<sub>2</sub>Cl<sub>2</sub>; ii) LDA, allyl bromide, -78 °C to r.t.; iii) LDA, MeI, -78 °C to r.t., 78% over three steps. (b) i) K<sub>2</sub>CO<sub>3</sub>, allyl bromide, DMF, 44%. (c) TsCl, Et<sub>3</sub>N, CH<sub>2</sub>Cl<sub>2</sub>, 74%. (d) LiAlH<sub>4</sub>, Et<sub>2</sub>O, 86%. (e) (COCl)<sub>2</sub>, DMSO, Et<sub>3</sub>N, CH<sub>2</sub>Cl<sub>2</sub>, 80%.

**Compound 9na.** Ethyl (4-aminophenyl)acetate (2.79 mmol, 500 mg), magnesium sulfate (500 mg) and

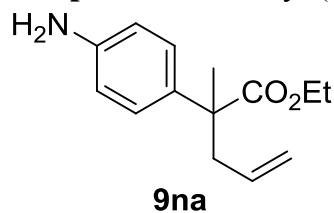

benzaldehyde (3.35 mmol, 342 μL) were dissolved in DCM (5 mL) and stirred for 16 hours at room temperature. The reaction was filtered and concentrated, affording a crude product that was used in the next step without further purification. This material (2.79 mmol, 745 mg) was used in the allylation procedure followed for the preparation of **1a**, except that nBu<sub>4</sub>NI was not added. The crude residue thus obtained was then used in the

methylation procedure described for the preparation of **9bb**. Upon completion, the mixture was cooled to 0 °C and then quenched carefully with concentrated hydrochloric acid. After basifying the mixture with 10% sodium hydroxide solution, it was extracted with Et<sub>2</sub>O. The organic layer was dried over MgSO<sub>4</sub> and the solvent removed under reduced pressure. Purification by flash column chromatography (petroleum ether/Et<sub>2</sub>O = 4:1) afforded **9na** as a colourless oil (465 mg, 78%). <sup>1</sup>H NMR (500 MHz, CDCl<sub>3</sub>): δ = 7.15-7.08 (m, 2H), 6.66-6.62 (m, 2H), 5.63 (ddt, *J* = 17.1, 10.0, 7.1 Hz, 1H), 5.09-5.01 (m, 2H), 4.10 (q, *J* = 7.1 Hz, 2H), 3.61 (br s, 2H), 2.82-2.75 (m, 1H), 2.60 (ddt, *J* = 13.7, 7.1, 1.2 Hz, 1H), 1.48 (s, 3H), 1.18 (t, *J* = 7.1 Hz, 3H); <sup>13</sup>C NMR (125 MHz, CDCl<sub>3</sub>): δ = 176.0 (e), 144.9 (e), 134.4 (o), 133.3 (e), 126.8 (o, 2C), 118.0 (e), 114.9 (o, 2C), 60.6 (e), 48.8 (e), 43.7 (e), 22.5 (o), 14.0 (o); IR (neat):  $\tilde{\nu}$  = 2978 (w), 2937 (w), 1714 (s), 1623 (s), 1515 (vs), 1464 (m), 1444 (m), 1377 (m), 1277 (m), 1227 (s), 1189 (m), 1172 (m), 1142 (m), 1098 (m), 1020 (m), 997 (m), 956 (w), 916 (m), 859 (m), 826 (m), 774 (w), 744 (w), 658 (w) cm<sup>-1</sup>; HRMS (CI(NH<sub>4</sub>)) calcd for (C<sub>14</sub>H<sub>19</sub>NO<sub>2</sub> + H): 234.1489; found: 234.1496.

**Compound 9nb.** Under a N<sub>2</sub> atmosphere, **9na** (1.99 mmol, 465 mg), potassium carbonate (2.19 mmol, 302 mg) dissolved in DMF (4 mL) was stirred at room temperature for 5 minutes before adding allyl bromide (1.99 mmol, 172 μL). After stirring for 16 hours, the mixture was quenched with water and extracted with Et<sub>2</sub>O. The organic phase was dried over MgSO<sub>4</sub> and the solvent was removed under reduced pressure. Purification by flash column chromatography (petroleum ether/Et<sub>2</sub>O = 5:1) afforded **9nb** as a colourless oil (236 mg, 44%). <sup>1</sup>H NMR (500 MHz, CDCl<sub>3</sub>): δ = 7.18-7.09 (m, 2H), 6.60-6.56 (m, 2H), 6.00-5.91 (m, 1H), 5.64 (ddt, *J* = 17.1, 10.0, 7.1 Hz, 1H), 5.31-5.25 (m, 1H), 5.18-5.14 (m, 1H), 5.09-5.00 (m, 2H), 4.11 (q, *J* = 7.1 Hz, 2H), 3.79-3.72 (m, 2H + 1H(NH)), 2.79 (dd, *J* = 13.8, 7.3 Hz, 1H), 2.63-2.56 (m, 1H), 1.48 (s, 3H), 1.19 (t, *J* = 7.1 Hz, 3H); <sup>13</sup>C NMR (125 MHz, CDCl<sub>3</sub>): δ = 176.1 (e), 146.6 (e), 135.5 (o), 134.6 (o), 132.3 (e), 126.8 (o, 2C), 117.9 (e), 116.2 (e), 112.7 (o, 2C), 60.6 (e), 48.8 (e), 46.6 (e), 43.8 (e), 22.5 (o), 14.0 (o); IR (neat):  $\tilde{\nu}$  = 3076 (w), 2978 (w), 2936 (w), 1719 (s), 1640 (w), 1614 (m), 1519 (vs), 1464 (w), 1445 (w), 1418 (w), 1376 (w), 1324 (w), 1228 (m), 1193 (m), 1142 (m), 1096 (m), 1022 (m), 996 (m), 916 (m), 859 (w), 822 (w), 774 (w), 655 (w) cm<sup>-1</sup>; HRMS (CI(NH<sub>4</sub>)) calcd for (C<sub>17</sub>H<sub>23</sub>NO<sub>2</sub> + H): 274.1802; found: 274.1811.

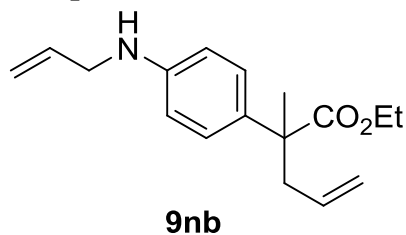

**Compound 9nc.** Under a N<sub>2</sub> atmosphere, **9nb** (0.86 mmol, 236 mg) was dissolved in CH<sub>2</sub>Cl<sub>2</sub> (4.3 mL). Triethylamine (1.30 mmol, 180 μL) was added at room temperature and the mixture was stirred for 5 minutes before adding tosyl chloride (1.30 mmol, 247 mg). The reaction was stirred until complete by TLC, and was quenched with a saturated aqueous solution of ammonium chloride and extracted with Et<sub>2</sub>O. The organic layer was dried over MgSO<sub>4</sub>, filtered and concentrated. Purification by flash column chromatography (petroleum ether/Et<sub>2</sub>O = 9:1) afforded **9nc** as a colourless oil (272 mg, 74%). <sup>1</sup>H NMR (500 MHz, CDCl<sub>3</sub>): δ = 7.50-7.45 (m, 2H), 7.25-7.20 (m, 4H), 7.01-6.97 (m, 2H), 5.73 (ddt, *J* = 16.8, 10.5, 6.4 Hz, 1H), 5.58 (ddt, *J* = 17.2, 9.9, 7.4 Hz, 1H), 5.11-5.02 (m, 4H), 4.17-4.13 (m, 2H), 4.13 (q, *J* = 7.2 Hz, 2H), 2.79 (dd, *J* = 13.7, 7.3 Hz, 1H), 2.60 (dd, *J* = 13.7, 7.2 Hz, 1H), 2.42 (s, 3H), 1.50 (s, 3H), 1.18 (t, *J* = 7.1 Hz, 3H); <sup>13</sup>C NMR (125 MHz, CDCl<sub>3</sub>): δ = 175.2 (e), 143.4 (e), 142.9 (e), 137.6 (e), 135.4 (e), 133.7 (o), 132.7 (o), 129.3 (o, 2C), 128.4 (o, 2C), 127.6 (o, 2C), 126.5 (o, 2C), 118.6 (e), 118.5 (e), 60.8 (e), 53.4 (e), 49.6 (e), 43.7 (e), 22.4 (o), 21.4 (o), 13.9 (o); IR (neat):  $\tilde{\nu}$  = 3077 (w), 2980 (w), 2933 (w), 1725 (s), 1641 (w), 1598 (w), 1508 (m), 1457 (m), 1418 (w), 1378 (w), 1350 (s), 1304 (w), 1228 (m), 1185 (vs), 1164 (w), 1145 (w), 1118 (w), 1092 (m), 997 (w), 923 (w), 865 (m), 815 (m), 763 (w), 710 (w), 663 (s), 587 (s), 548 (s) cm<sup>-1</sup>; HRMS (CI(NH<sub>4</sub>)) calcd for (C<sub>24</sub>H<sub>29</sub>NO<sub>4</sub>S + H): 428.1890; found: 428.1904.

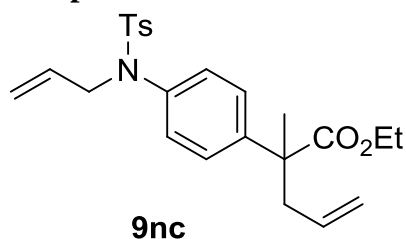

**Compound 9nd.** This compound was obtained from **9nc** (0.64 mmol, 272 mg) following the same procedure as for the preparation of **1b**. Colourless oil (210 mg, 86%). <sup>1</sup>H NMR (500 MHz, CDCl<sub>3</sub>): δ = 7.51-7.46 (m, 2H), 7.31-7.22 (m, 4H), 7.05-6.99 (m, 2H), 5.74 (ddt, *J* = 16.2, 11.1, 6.1 Hz, 1H), 5.55 (dddd, *J* = 16.9, 10.2, 7.9, 6.7 Hz, 1H), 5.09 (dq, *J* = 17.1, 1.4 Hz, 1H), 5.06-4.97 (m, 3H), 4.20-4.11 (m, 2H), 3.73 (dd, *J* = 11.0, 5.8 Hz, 1H), 3.60 (dd, *J* = 11.0, 7.3 Hz, 1H), 2.49 (dd, *J* = 13.9, 6.7 Hz, 1H), 2.43 (s, 3H), 2.35 (dd, *J* = 13.9, 7.8 Hz, 1H), 1.31 (s, 3H), 1.23 (dd, *J* = 7.3, 5.9 Hz, 1H (OH)); <sup>13</sup>C NMR (125 MHz, CDCl<sub>3</sub>): δ = 144.4 (e), 143.4 (e), 137.2 (e), 135.5 (e), 134.2 (o), 132.9 (o), 129.4 (o, 2C), 128.5 (o, 2C), 127.6 (o, 2C), 127.2 (o, 2C), 118.6 (e), 117.7 (e), 71.3 (e), 53.5 (e), 43.1 (e), 43.0 (e), 21.8 (o), 21.5 (o); IR (neat):  $\tilde{\nu}$  = 3427 (br), 3074 (w), 2973 (w), 2923 (w), 2873 (w), 1640 (w), 1598 (w), 1509 (m), 1454 (w), 1417 (w), 1345 (s), 1306 (w), 1290 (w), 1226 (w), 1185 (w), 1163 (vs), 1091 (m), 1063 (w), 1038 (w), 1018 (w), 998 (w), 922 (m), 868 (m), 815 (m), 764 (w), 741 (w), 707 (w), 664 (s), 599 (m), 582 (m), 549 (s) cm<sup>-1</sup>; HRMS (CI(NH<sub>4</sub>)) calcd for (C<sub>22</sub>H<sub>27</sub>NO<sub>3</sub>S + H): 386.1784; found: 386.1788.

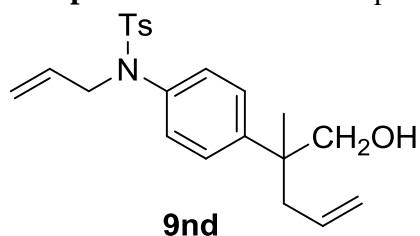

**Compound 9n.** This compound was obtained from **9ne** (0.54 mmol, 210 mg) following the same

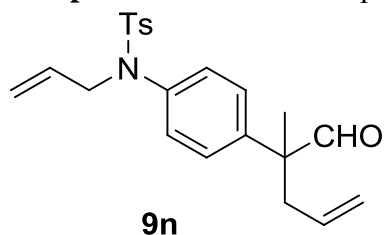

procedure as for the preparation of **1**. Colourless oil (166 mg, 80%). <sup>1</sup>H NMR (500 MHz, CDCl<sub>3</sub>): δ = 9.49 (s, 1H), 7.50-7.41 (m, 2H), 7.26-7.21 (m, 2H), 7.18-7.13 (m, 2H), 7.07-7.02 (m, 2H), 5.70 (ddt, *J* = 16.8, 10.5, 6.3 Hz, 1H), 5.50 (ddt, *J* = 16.8, 9.1, 7.8 Hz, 1H), 5.09-4.98 (m, 4H), 4.14 (d, *J* = 6.2 Hz, 2H), 2.66-2.55 (m, 2H), 2.41 (s, 3H), 1.41 (s, 3H); <sup>13</sup>C NMR (125 MHz, CDCl<sub>3</sub>): δ = 201.5 (o), 143.5 (e), 138.9 (e), 138.2 (e), 135.2 (e), 132.8 (o), 132.6 (o), 129.4 (o, 2C), 128.8 (o, 2C), 127.6 (o, 4C),

118.8 (e), 118.7 (e), 53.32 (e), 53.28 (e), 40.6 (e), 21.4 (o), 18.7 (o); IR (neat):  $\tilde{\nu}$  = 3076 (w), 2978 (w), 2924 (w), 2809 (w), 2711 (w), 1721 (s), 1641 (w), 1598 (m), 1507 (m), 1454 (w), 1417 (w), 1345 (s), 1306 (w), 1290 (w), 1224 (w), 1185 (w), 1161 (vs), 1118 (w), 1090 (s), 1064 (m), 1018 (m), 995 (m), 920 (s), 865 (s), 814 (s), 764 (m), 740 (w), 707 (m), 660 (vs), 583 (vs), 546 (vs) cm<sup>-1</sup>; HRMS (CI(NH<sub>4</sub>)) calcd for (C<sub>22</sub>H<sub>25</sub>NO<sub>3</sub>S + H): 384.1628; found: 384.1641.

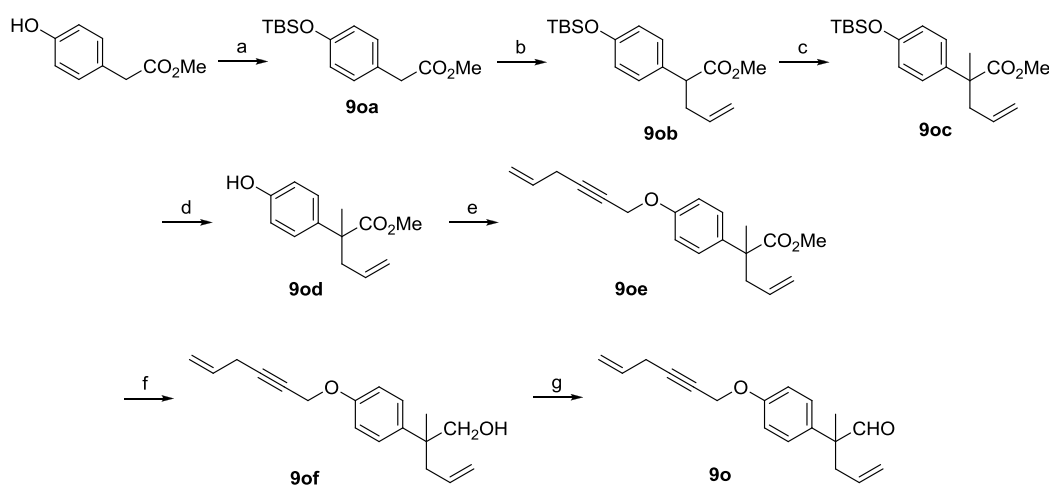

(a) TBSCl, Et<sub>3</sub>N, DMF, 88%. (b) i) LDA, THF, -78 °C; ii) allyl bromide, nBu<sub>4</sub>NI, -78 °C to r.t., 85%. (c) i) LDA, THF, -78 °C; ii) MeI, -78 °C to r.t., 76%. (d) nBu<sub>4</sub>F·3H<sub>2</sub>O, THF, 87%. (e) PPh<sub>3</sub>, diethyl azodicarboxylate, hex-5-en-2-yn-1-ol, THF, 59%. (f) LiAlH<sub>4</sub>, Et<sub>2</sub>O, 96%. (g) (COCl)<sub>2</sub>, DMSO, Et<sub>3</sub>N, CH<sub>2</sub>Cl<sub>2</sub>, 89%.

**Compound 9oa.** Methyl 4-hydroxyphenylacetate (12.04 mmol, 2.0 g) was dissolved in DMF (30 mL),

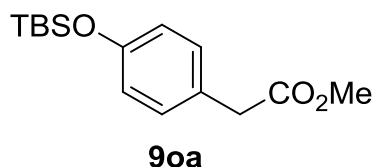

triethylamine (13.24 mmol, 1.84 mL) was added and stirred for 10 minutes at room temperature before adding *tert*-Butyldimethylsilyl chloride (13.24 mmol, 2.0 g), stirring for 1 hour at room temperature. The mixture was quenched with a saturated aqueous solution of ammonium chloride, extracted with Et<sub>2</sub>O and the combined organic layers were washed several times with water, then dried over MgSO<sub>4</sub>, filtered and concentrated.

Purification by flash column chromatography (petroleum ether/Et<sub>2</sub>O = 19:1) afforded **9oa** as a colourless oil (2.98 g, 88%). <sup>1</sup>H NMR (500 MHz, CDCl<sub>3</sub>): δ = 7.15-7.10 (m, 2H), 6.81-6.76 (m, 2H), 3.69 (s, 3H), 3.55 (s, 2H), 0.98 (s, 9H), 0.19 (s, 6H), in agreement with data previously reported.<sup>10</sup>

<sup>10</sup> A. S. K. Hashmi, L. Schwartz, J. W. Bats, *J. Prakt. Chem.* **2000**, 342, 40

**Compound 9ob.** This compound was obtained from **9oa** (9.96 mmol, 2.79 g) following the same procedure as for the preparation of **1a**. Colourless oil (2.71 g, 85%). <sup>1</sup>H NMR (500 MHz, CDCl<sub>3</sub>): δ = 7.17-7.14 (m, 2H), 6.79-6.75 (m, 2H), 5.70 (ddt, *J* = 17.1, 10.2, 6.8 Hz, 1H), 5.06 (ddt, *J* = 17.1, 1.5, 1.4 Hz, 1H), 5.01-4.97 (m, 1H), 3.65 (s, 3H), 3.57 (dd, *J* = 8.6, 6.9 Hz, 1H), 2.82-2.74 (m, 1H), 2.50-2.43 (m, 1H), 0.97 (s, 9H), 0.19 (s, 6H); <sup>13</sup>C NMR (125 MHz, CDCl<sub>3</sub>): δ = 174.1 (e), 154.9 (e), 135.4 (o), 131.2 (e), 128.9 (o, 2C), 120.1 (o, 2C), 116.8 (e), 51.9 (o), 50.6 (o), 37.8 (e), 25.7 (o, 3C), 18.2 (e), -4.4 (o), -4.6 (o); IR (neat):  $\tilde{\nu}$  = 2953 (m), 2931 (m), 2859 (m), 1738 (s), 1642 (w), 1608 (m), 1509 (vs), 1472 (w), 1435 (w), 1390 (w), 1362 (w), 1344 (w), 1260 (vs), 1197 (m), 1161 (s), 994 (w), 914 (s), 839 (s), 808 (m), 780 (s), 695 (w) cm<sup>-1</sup>; HRMS (ESI) calcd for (C<sub>18</sub>H<sub>28</sub>O<sub>3</sub>Si + Na): 343.1705; found: 343.1702.

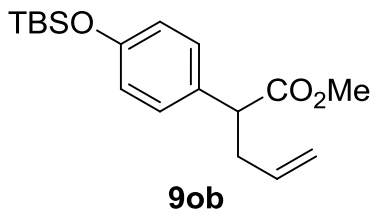

**Compound 9oc.** This compound was obtained from **9ob** (8.42 mmol, 2.7 g) following the same procedure as for the preparation of **9bb**. Colourless oil (2.12 g, 76%). <sup>1</sup>H NMR (500 MHz, CDCl<sub>3</sub>): δ = 7.18-7.13 (m, 2H), 6.80-6.75 (m, 2H), 5.60 (ddt, *J* = 17.1, 10.1, 7.2 Hz, 1H), 5.08-5.01 (m, 2H), 3.65 (s, 3H), 2.79 (dd, *J* = 13.7, 7.4 Hz, 1H), 2.61 (dd, *J* = 13.7, 7.1 Hz, 1H), 1.50 (s, 3H), 0.97 (s, 9H), 0.19 (s, 6H); <sup>13</sup>C NMR (125 MHz, CDCl<sub>3</sub>): δ = 176.4 (e), 154.3 (e), 135.9 (e), 134.2 (o), 127.0 (o, 2C), 119.7 (o, 2C), 118.2 (e), 52.0 (o), 49.3 (e), 43.9 (e), 25.6 (o, 3C), 22.6 (o), 18.1 (e), -4.4 (o, 2C); IR (neat):  $\tilde{\nu}$  = 2952 (m), 2931 (m), 2887 (w), 2858 (w), 1731 (s), 1640 (w), 1607 (m), 1509 (s), 1472 (m), 1463 (m), 1434 (w), 1412 (w), 1390 (w), 1377 (w), 1362 (w), 1255 (s), 1178 (m), 1143 (m), 1111 (w), 1093 (w), 1013 (w), 995 (w), 912 (vs), 835 (vs), 807 (s), 779 (vs), 735 (w), 697 (w), 663 (w) cm<sup>-1</sup>; HRMS (CI(NH<sub>4</sub>)) calcd for (C<sub>19</sub>H<sub>30</sub>O<sub>3</sub>Si + H): 337.2050; found: 337.2058.

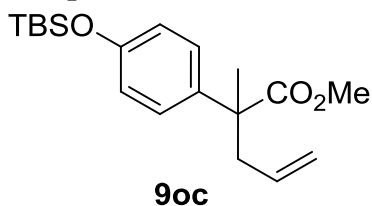

**Compound 9od.** Intermediate **9oc** (6.35 mmol, 2.12 g) was dissolved in THF (32 mL). Tetrabutylammonium fluoride trihydrate (7.62 mmol, 2.4 g) was added in one portion and the mixture was stirred at room temperature for 1 hour. The reaction was quenched with water, extracted with Et<sub>2</sub>O and the organic phase dried (magnesium sulfate), filtered and concentrated. The resultant crude was purified by flash column chromatography (petroleum ether/Et<sub>2</sub>O = 9:1) afforded **9of** as a colourless oil (1.22 g, 87%). <sup>1</sup>H NMR (500 MHz, CDCl<sub>3</sub>): δ = 7.21-7.16 (m, 2H), 6.81-6.76 (m, 2H), 5.60 (ddt, *J* = 17.1, 10.1, 7.2 Hz, 1H), 5.09-5.02 (m, 2H), 4.68 (br s, 1H (OH)), 3.65 (s, 3H), 2.81-2.76 (m, 1H), 2.62 (ddt, *J* = 13.7, 7.0, 1.2 Hz, 1H), 1.50 (s, 3H); <sup>13</sup>C NMR (125 MHz, CDCl<sub>3</sub>): δ = 176.9 (e), 154.5 (e), 135.2 (e), 134.0 (o), 127.2 (o, 2C), 118.4 (e), 115.2 (o, 2C), 52.2 (o), 49.2 (e), 43.7 (e), 22.6 (o); IR (neat):  $\tilde{\nu}$  = 3398 (br), 3076 (w), 2979 (w), 2951 (w), 1728 (m), 1703 (s), 1640 (w), 1613 (m), 1594 (m), 1514 (vs), 1434 (m), 1378 (m), 1220 (vs), 1180 (s), 1144 (s), 1111 (m), 1093 (w), 1013 (w), 995 (m), 957 (w), 916 (m), 856 (w), 830 (s), 775 (w), 754 (w), 737 (m), 704 (w), 661 (w) cm<sup>-1</sup>; HRMS (CI(NH<sub>4</sub>)) calcd for (C<sub>13</sub>H<sub>16</sub>O<sub>3</sub> + H): 221.1172; found: 221.1179.

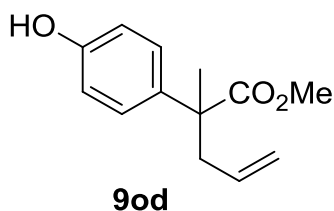

**Compound 9oe.** In a schlenk flask under N<sub>2</sub>, **9od** (0.91 mmol, 200 mg), triphenyl phosphine (1.00 mmol, 262 mg), diethyl azodicarboxylate (1.00 mmol, 174 mg) and hex-5-en-2-yn-1-ol<sup>11</sup> (1.36 mmol, 131 mg) were added in THF (3.6 mL). The flask was sealed and refluxed at 70 °C for 18 hours. The reaction was concentrated, and the crude residue was purified by flash column chromatography (petroleum ether/Et<sub>2</sub>O = 99:1), affording **9oe** as a colourless oil (160 mg, 59%). <sup>1</sup>H NMR (500 MHz, CDCl<sub>3</sub>): δ = 7.26-

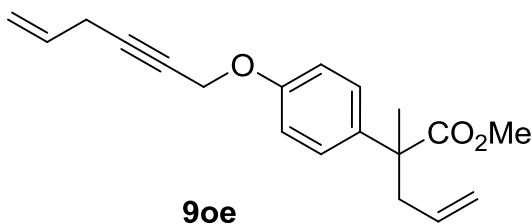

<sup>11</sup> Prepared according to T. Yoshinori, K. Ohmori, M. G. Schrems, A. Pfaltz, K. Suzuki, *Angew. Chem. Int. Ed.* **2010**, *49*, 881.



7.21 (m, 2H), 6.96-6.91 (m, 2H), 5.79 (ddt,  $J = 16.8, 10.2, 5.2$  Hz, 1H), 5.60 (ddt,  $J = 17.1, 10.1, 7.2$  Hz, 1H), 5.28 (dtd,  $J = 17.0, 1.9, 1.5$  Hz, 1H), 5.11 (dq,  $J = 10.0, 1.7$  Hz, 1H), 5.09-5.02 (m, 2H), 4.69 (t,  $J = 2.1$  Hz, 2H), 3.65 (s, 3H), 3.03-3.00 (m, 2H), 2.83-2.77 (m, 1H), 2.63 (ddt,  $J = 13.7, 7.0, 1.2$  Hz, 1H), 1.51 (s, 3H);  $^{13}\text{C}$  NMR (125 MHz,  $\text{CDCl}_3$ ):  $\delta = 176.4$  (e), 156.6 (e), 136.0 (e), 134.1 (o), 131.9 (o), 127.1 (o, 2C), 118.3 (e), 116.4 (e), 114.7 (o, 2C), 84.6 (e), 77.3 (e), 56.4 (e), 52.1 (o), 49.3 (e), 43.8 (e), 23.1 (e), 22.7 (o); IR (neat):  $\tilde{\nu} = 3077$  (w), 2980 (w), 2950 (w), 1727 (vs), 1641 (m), 1608 (m), 1582 (w), 1510 (vs), 1457 (m), 1434 (m), 1417 (w), 1376 (m), 1282 (m), 1223 (s), 1184 (s), 1142 (m), 1119 (w), 1097 (m), 1052 (w), 1011 (s), 915 (s), 828 (s), 805 (w), 774 (w), 751 (w), 735 (w)  $\text{cm}^{-1}$ ; HRMS ( $\text{CI}(\text{NH}_4)$ ) calcd for ( $\text{C}_{19}\text{H}_{22}\text{O}_3 + \text{H}$ ): 299.1642; found: 299.1654.

**Compound 9of.** This compound was obtained from **9oe** (0.53 mmol, 158 mg) following the same procedure as for the preparation of **1b**. Colourless oil (138 mg, 96%).

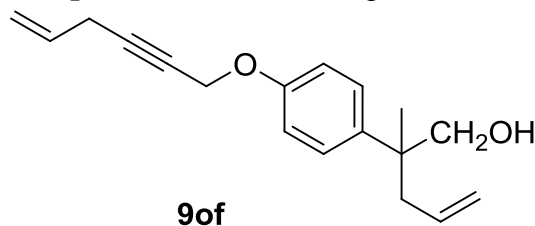

$^1\text{H}$  NMR (500 MHz,  $\text{CDCl}_3$ ):  $\delta = 7.31$ -7.26 (m, 2H), 6.99-6.93 (m, 2H), 5.80 (ddt,  $J = 17.0, 10.1, 5.3$  Hz, 1H), 5.60 (dddd,  $J = 17.0, 10.2, 7.9, 6.7$  Hz, 1H), 5.28 (dq,  $J = 17.0, 1.8$  Hz, 1H), 5.11 (dq,  $J = 10.0, 1.7$  Hz, 1H), 5.07-5.01 (m, 1H), 5.01-4.97 (m, 1H), 4.70 (t,  $J = 2.2$  Hz, 2H), 3.71 (d,  $J = 11.0$  Hz, 1H), 3.57 (d,  $J = 10.9$  Hz, 1H), 3.04-3.00 (m, 2H), 2.55-

2.49 (m, 1H), 2.36-2.30 (m, 1H), 1.31 (s, 4H);  $^{13}\text{C}$  NMR (125 MHz,  $\text{CDCl}_3$ ):  $\delta = 156.1$  (e), 137.1 (e), 134.5 (o), 131.9 (o), 127.7 (o, 2C), 117.4 (e), 116.3 (e), 114.7 (o, 2C), 84.5 (e), 77.3 (e), 71.7 (e), 56.3 (e), 43.0 (e), 42.5 (e), 23.0 (e), 21.9 (o); IR (neat):  $\tilde{\nu} = 3410$  (br), 3074 (w), 2974 (w), 2917 (w), 1640 (m), 1608 (m), 1580 (w), 1510 (vs), 1456 (w), 1416 (w), 1372 (m), 1296 (m), 1262 (w), 1225 (s), 1185 (s), 1138 (w), 1117 (w), 1011 (vs), 951 (w), 913 (s), 826 (s), 805 (w), 734 (w)  $\text{cm}^{-1}$ ; HRMS ( $\text{CI}(\text{NH}_4)$ ) calcd for ( $\text{C}_{18}\text{H}_{22}\text{O}_2 + \text{NH}_4$ ): 288.1958; found: 288.1968.

**Compound 9o.** This compound was obtained from **9of** (0.51 mmol, 137 mg) following the same procedure as for the preparation of **1**. Colourless oil (121 mg, 89%).

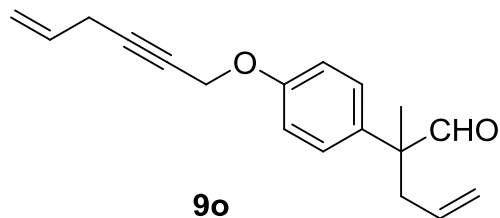

$^1\text{H}$  NMR (500 MHz,  $\text{CDCl}_3$ ):  $\delta = 9.47$  (s, 1H), 7.20-7.16 (m, 2H), 7.01-6.97 (m, 2H), 5.79 (ddt,  $J = 17.0, 10.0, 5.3$  Hz, 1H), 5.55 (dddd,  $J = 17.0, 10.1, 7.7, 6.9$  Hz, 1H), 5.27 (dtd,  $J = 17.0, 1.9, 1.5$  Hz, 1H), 5.10 (dq,  $J = 10.0, 1.7$  Hz, 1H), 5.06 (ddt,  $J = 16.7, 2.1, 1.4$  Hz, 1H), 5.03 (ddt,  $J = 9.8, 2.0, 1.1$  Hz, 1H), 4.71 (t,  $J = 2.2$  Hz, 2H), 3.03-3.00 (m, 2H), 2.67 (ddt,  $J = 14.1,$

6.9, 1.3 Hz, 1H), 2.60 (ddt,  $J = 14.1, 7.7, 1.1$  Hz, 1H), 1.42 (s, 3H);  $^{13}\text{C}$  NMR (125 MHz,  $\text{CDCl}_3$ ):  $\delta = 201.7$  (o), 156.9 (e), 133.2 (o), 131.8 (o, e, 2C), 128.2 (o, 2C), 118.4 (e), 116.3 (e), 115.1 (o, 2C), 84.7 (e), 77.1 (e), 56.3 (e), 52.8 (e), 40.5 (e), 23.0 (e), 18.8 (o); IR (neat):  $\tilde{\nu} = 3079$  (w), 2978 (w), 2927 (w), 2809 (w), 2709 (w), 1720 (vs), 1641 (m), 1607 (m), 1580 (w), 1509 (vs), 1457 (w), 1417 (w), 1372 (m), 1297 (m), 1262 (w), 1243 (w), 1227 (s), 1185 (s), 1138 (w), 1118 (w), 1050 (w), 1010 (s), 914 (s), 826 (s), 806 (w), 728 (m)  $\text{cm}^{-1}$ ; HRMS ( $\text{CI}(\text{NH}_4)$ ) calcd for ( $\text{C}_{18}\text{H}_{20}\text{O}_2 + \text{NH}_4$ ): 286.1802; found: 286.1811.

## Preparation of compounds 11, 13, 15,<sup>12</sup> and 18

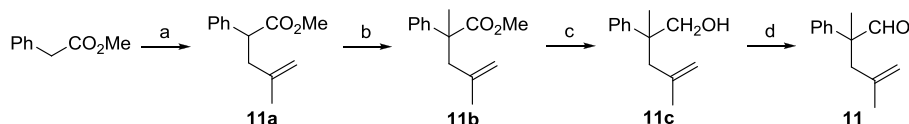

(a) i) LDA, THF,  $-78\text{ }^{\circ}\text{C}$ ; ii) 3-Bromo-2-methylpropene,  $n\text{Bu}_4\text{NI}$ ,  $-78\text{ }^{\circ}\text{C}$  to r.t., 67%. (b) i) LDA, THF,  $-78\text{ }^{\circ}\text{C}$ ; ii) MeI,  $-78\text{ }^{\circ}\text{C}$  to r.t., 95%. (c)  $\text{LiAlH}_4$ ,  $\text{Et}_2\text{O}$ , 84%. (d)  $(\text{COCl})_2$ , DMSO,  $\text{Et}_3\text{N}$ ,  $\text{CH}_2\text{Cl}_2$ , 91%.

**Compound 11a.** This compound was obtained from methyl phenylacetate (6.66 mmol, 0.96 mL) the same procedure as for the preparation of **1a**, except that 3-Bromo-2-methylpropene (7.32 mmol, 0.74 mL) was used. Colourless oil (915 mg, 67%);  $^1\text{H NMR}$  (500 MHz,  $\text{CDCl}_3$ ):  $\delta = 7.35\text{--}7.29$  (m, 4H), 7.29–7.23 (m, 1H), 4.75 (s, 1H), 4.69 (s, 1H), 3.81 (dd,  $J = 9.1, 6.4$  Hz, 1H), 3.65 (s, 3H), 2.84 (dd,  $J = 14.7, 9.1$  Hz, 1H), 2.44 (dd,  $J = 14.7, 6.4$  Hz, 1H), 1.72 (s, 3H), in agreement with previously reported data.<sup>4</sup>

**Compound 11b.** This compound was obtained from **11a** (4.48 mmol, 915 mg) following the same procedure as for the preparation of **9bb**. Colourless oil (933 mg, 95%).  $^1\text{H NMR}$  (500 MHz,  $\text{CDCl}_3$ ):  $\delta = 7.38\text{--}7.29$  (m, 4H), 7.26–7.22 (m, 1H), 4.84–4.82 (m, 1H), 4.67–4.44 (m, 1H), 3.65 (s, 3H), 2.96 (d,  $J = 13.6$  Hz, 1H), 2.64 (d,  $J = 13.6$  Hz, 1H), 1.56 (s, 3H), 1.48 (s, 3H);  $^{13}\text{C NMR}$  (125 MHz,  $\text{CDCl}_3$ ):  $\delta = 176.6$  (e), 143.9 (e), 142.1 (e), 128.3 (o, 2C), 126.8 (o), 126.0 (o, 2C), 115.2 (e), 52.1 (o), 49.5 (e), 47.0 (e), 23.7 (o), 22.3 (o); IR (neat):  $\tilde{\nu} = 3073$  (w), 2982 (w), 2949 (w), 1731 (vs), 1644 (w), 1600 (w), 1497 (w), 1446 (m), 1434 (w), 1378 (w), 1301 (w), 1260 (w), 1204 (m), 1144 (w), 1105 (m), 1075 (w), 1032 (w), 986 (w), 896 (m), 821 (w), 763 (w), 730 (w), 698 (m)  $\text{cm}^{-1}$ ; HRMS (CI( $\text{NH}_4$ )) calcd for ( $\text{C}_{14}\text{H}_{18}\text{O}_2 + \text{H}$ ): 219.1378; found: 219.1379; elemental analysis (%) calcd for  $\text{C}_{14}\text{H}_{18}\text{O}_2$ : C 77.03, H 8.31; found: C 77.37, H 8.34.

**Compound 11c.** This compound was obtained from **11b** (2.29 mmol, 500 mg) following the same procedure as for the preparation of **1b**. Colourless oil (364 mg, 84%).  $^1\text{H NMR}$  (500 MHz,  $\text{CDCl}_3$ ):  $\delta = 7.41\text{--}7.31$  (m, 4H), 7.25–7.20 (m, 1H), 4.77–4.74 (m, 1H), 4.59–4.56 (m, 1H), 3.80 (dd,  $J = 10.9, 5.1$  Hz, 1H), 3.60 (dd,  $J = 10.9, 8.2$  Hz, 1H), 2.50 (d,  $J = 13.6$  Hz, 1H), 2.33 (dd,  $J = 13.6, 0.6$  Hz, 1H), 1.38 (s, 3H), 1.35–1.33 (m, 3H), 1.24 (dd,  $J = 8.2, 5.1$  Hz, 1H (OH));  $^{13}\text{C NMR}$  (125 MHz,  $\text{CDCl}_3$ ):  $\delta = 144.9$  (e), 142.5 (e), 128.2 (o, 2C), 126.7 (o, 2C), 126.0 (o), 114.3 (e), 72.0 (e), 46.6 (e), 43.0 (e), 24.4 (o), 21.5 (o); IR (neat):  $\tilde{\nu} = 3382$  (br), 3071 (w), 2967 (w), 2919 (w), 1642 (w), 1600 (w), 1497 (w), 1445 (m), 1374 (m), 1265 (w), 1148 (w), 10076 (w), 1027 (s), 981 (w), 908 (s), 764 (m), 732 (vs), 700 (s)  $\text{cm}^{-1}$ ; HRMS (CI( $\text{NH}_4$ )) calcd for ( $\text{C}_{13}\text{H}_{18}\text{O} + \text{NH}_4$ ): 208.1696; found: 208.1692.

**Compound 11.** This compound was obtained from **11c** (0.53 mmol, 100 mg) following the same procedure as for the preparation of **1**. Colourless oil (90 mg, 91%).  $^1\text{H NMR}$  (500 MHz,  $\text{CDCl}_3$ ):  $\delta = 9.54$  (s, 1H), 7.40–7.35 (m, 2H), 7.31–7.27 (m, 3H), 4.82–4.79 (m, 1H), 4.63–4.61 (m, 1H), 2.72 (d,  $J = 13.9$  Hz, 1H), 2.65 (d,  $J = 13.9$  Hz, 1H), 1.47 (s, 3H), 1.40 (s, 3H);  $^{13}\text{C NMR}$  (125 MHz,  $\text{CDCl}_3$ ):  $\delta = 201.9$  (o), 141.5 (e), 139.9 (e), 128.8 (o, 2C), 127.3 (o, 2C), 115.5 (e), 53.5 (e), 44.3 (e), 24.2 (o), 18.6 (o); IR (neat):  $\tilde{\nu} = 3074$  (w), 3026 (w), 2970 (w), 2942 (w), 2805 (w), 2710 (w), 1721 (vs), 1644 (m), 1599 (w), 1582 (w), 1494 (m), 1446 (m), 1376 (m), 1320 (w), 1258 (w), 1159 (w), 1079 (w), 1030 (w), 983 (w), 895 (m), 852 (w), 804 (w), 760 (m), 699 (vs)  $\text{cm}^{-1}$ ; elemental analysis (%) calcd for  $\text{C}_{13}\text{H}_{16}\text{O}$ : C 82.94, H 8.57; found: C 82.49, H 8.69.

<sup>12</sup> **15** is a known compound, see: C. Aïssa, K. Y-T. Ho, D. J. Tetlow, M. Pin-Nó, *Angew. Chem. Int. Ed* **2014**, 53, 4209

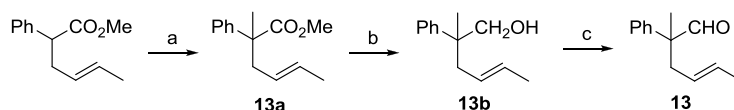

(<sup>a</sup>) i) NaH, DMF; ii) MeI, 76%. (<sup>b</sup>) LiAlH<sub>4</sub>, Et<sub>2</sub>O, quantitative. (<sup>c</sup>) (COCl)<sub>2</sub>, DMSO, Et<sub>3</sub>N, CH<sub>2</sub>Cl<sub>2</sub>, 83%.

**Compound 13a.** Under a N<sub>2</sub> atmosphere, NaH (0.81 mmol, 32 mg, 60% in oil) was suspended in DMF (8 mL) and the mixture was cooled to 0 °C. (*E*)-methyl 2-phenylhex-4-enoate (0.81 mmol, 166 mg) was added and the mixture was stirred for 15 minutes before adding methyl iodide (0.81 mmol, 51 μL) at 0 °C. The reaction was stirred for 16 hours, before quenching with a saturated aqueous solution of ammonium chloride, extracting with Et<sub>2</sub>O and washing the organic layer several times with water. The organic layer was dried over MgSO<sub>4</sub>, filtered and concentrated. Purification by flash column chromatography (petroleum ether/Et<sub>2</sub>O = 90:1) afforded **13a** as a colourless oil (134 mg, 76%). <sup>1</sup>H NMR (500 MHz, CDCl<sub>3</sub>): δ = 7.35-7.28 (m, 4H), 7.26-7.21 (m, 1H), 5.48 (dqt, *J* = 15.1, 6.5, 1.2 Hz, 1H), 5.28-5.20 (m, 1H), 3.65 (s, 3H), 2.77 (dd, *J* = 13.7, 7.3 Hz, 1H), 2.60-2.52 (m, 1H), 1.65-1.60 (m, 3H), 1.51 (s, 3H); <sup>13</sup>C NMR (125 MHz, CDCl<sub>3</sub>): δ = 176.3 (e), 143.6 (e), 128.9 (o), 128.3 (o, 2C), 126.6 (o), 126.2 (o), 125.9 (o, 2C), 51.9 (o), 50.2 (e), 42.4 (e), 22.7 (o), 17.9 (o); IR (neat):  $\tilde{\nu}$  = 3026 (w), 2984 (w), 2949 (w), 2856 (w), 1729 (vs), 1600 (w), 1583 (w), 1497 (m), 1446 (m), 1434 (m), 1377 (m), 1264 (m), 1223 (m), 1202 (m), 1135 (m), 1102 (m), 1072 (m), 1030 (m), 968 (m), 940 (w), 924 (w), 857 (w), 794 (w), 768 (m), 734 (m), 697 (vs) cm<sup>-1</sup>; HRMS (CI(NH<sub>4</sub>)) calcd for (C<sub>14</sub>H<sub>18</sub>O<sub>2</sub> + H): 219.1380; found: 219.1385.

**Compound 13b.** This compound was obtained from **13a** (0.61 mmol, 133 mg) following the same procedure as for the preparation of **1b**. Colourless oil (118 mg, quantitative). <sup>1</sup>H NMR (500 MHz, CDCl<sub>3</sub>): δ = 7.39-7.32 (m, 4H), 7.25-7.20 (m, 1H), 5.46 (dqt, *J* = 15.2, 6.3, 1.3 Hz, 1H), 5.27-5.19 (m, 1H), 3.74 (dd, *J* = 11.0, 5.1 Hz, 1H), 3.60 (dd, *J* = 11.0, 7.0 Hz, 1H), 2.50-2.43 (m, 1H), 2.34-2.27 (m, 1H), 1.68-1.58 (m, 3H), 1.31 (s, 3H), 1.20 (t, *J* = 6.3 Hz, 1H (OH)); <sup>13</sup>C NMR (125 MHz, CDCl<sub>3</sub>): δ = 145.0 (e), 128.3 (o, 2C), 127.9 (o), 126.7 (o), 126.6 (o, 2C), 126.0 (o), 71.6 (e), 43.2 (e), 41.6 (e), 21.8 (o), 17.9 (o); IR (neat):  $\tilde{\nu}$  = 3374 (br), 3089 (w), 3058 (w), 3024 (w), 2964 (w), 2916 (m), 2879 (w), 1601 (w), 1497 (m), 1444 (m), 1376 (m), 1156 (w), 1024 (s), 967 (s), 913 (w), 842 (w), 758 (m), 700 (vs) cm<sup>-1</sup>; HRMS (CI(NH<sub>4</sub>)) calcd for (C<sub>13</sub>H<sub>18</sub>O + NH<sub>4</sub>): 208.1696; found: 208.1706.

**Compound 13.** This compound was obtained from **11c** (0.61 mmol, 115 mg) following the same procedure as for the preparation of **1**. Colourless oil (94 mg, 83%). <sup>1</sup>H NMR (500 MHz, CDCl<sub>3</sub>): δ = 9.52 (s, 1H), 7.41-7.35 (m, 2H), 7.31-7.23 (m, 3H), 5.47 (dqt, *J* = 15.2, 6.3, 1.2 Hz, 1H), 5.23-5.15 (m, 1H), 2.62-2.58 (m, 2H), 1.62-1.58 (m, 3H), 1.41 (s, 3H); <sup>13</sup>C NMR (125 MHz, CDCl<sub>3</sub>): δ = 202.4 (o), 139.9 (e), 129.2 (o), 128.8 (o, 2C), 127.2 (o), 127.1 (o, 2C), 125.3 (o), 53.8 (e), 39.3 (e), 19.0 (o), 17.9 (o); IR (neat):  $\tilde{\nu}$  = 3059 (w), 3026 (w), 29877 (w), 2918 (w), 2855 (w), 2805 (w), 2706 (w), 1722 (vs), 1600 (w), 1582 (w), 1495 (m), 1445 (m), 1389 (w), 1372 (w), 1332 (w), 1261 (w), 1158 (w), 1076 (w), 1029 (m), 967 (s), 917 (m), 861 (w), 836 (w), 759 (m), 725 (w), 698 (vs), 656 (w) cm<sup>-1</sup>; HRMS (CI(NH<sub>4</sub>)) calcd for (C<sub>13</sub>H<sub>16</sub>O + NH<sub>4</sub>): 206.1539; found: 206.1535.

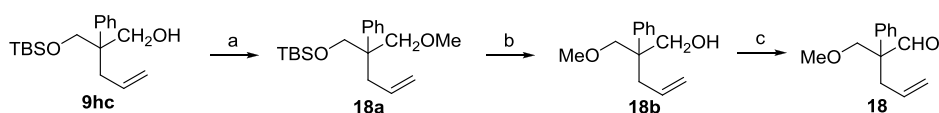

(a) i) NaH, THF; ii) MeI, 99%. (b) HCl, MeOH, 81%. (c) (COCl)<sub>2</sub>, DMSO, Et<sub>3</sub>N, CH<sub>2</sub>Cl<sub>2</sub>, 85%.

**Compound 18a.** Under a N<sub>2</sub> atmosphere, sodium hydride (1.17 mmol, 47 mg, 60% in oil) was suspended in THF (5 mL) and cooled to 0 °C. **9hc** (0.98 mmol, 300 mg) was added *via* syringe and was stirred to room temperature for 15 minutes. Methyl iodide (1.17 mmol, 73 μL) was added and the reaction was stirred at room temperature for 17 hours. The reaction was quenched with a saturated aqueous solution of ammonium chloride, extracted with Et<sub>2</sub>O, and the organic layer was

washed several times with water, then dried over MgSO<sub>4</sub>, filtered and concentrated. Purification by flash column chromatography (petroleum ether/Et<sub>2</sub>O = 98:1) afforded **18a** as a colourless oil (310 mg, 99%); <sup>1</sup>H NMR (500 MHz, CDCl<sub>3</sub>): δ = 7.34-7.27 (m, 4H), 7.21-7.16 (m, 1H), 5.51 (ddt, *J* = 17.2, 10.0, 7.2 Hz, 1H), 5.02-4.97 (m, 1H), 4.94-4.90 (m, 1H), 3.83 (d, *J* = 9.4 Hz, 1H), 3.77 (d, *J* = 9.4 Hz, 1H), 3.64 (d, *J* = 9.0 Hz, 1H), 3.59 (d, *J* = 9.0 Hz, 1H), 3.32 (s, 3H), 2.53-2.43 (m, 2H), 0.87 (s, 9H), 0.00 (s, 3H), -0.02 (s, 3H); <sup>13</sup>C NMR (125 MHz, CDCl<sub>3</sub>): δ = 142.9 (e), 134.4 (o), 127.9 (o, 2C), 126.9 (o, 2C), 126.0 (o), 117.2 (e), 75.1 (e), 65.6 (e), 59.1 (o), 46.9 (e), 38.6 (e), 25.8 (o, 3C), 18.2 (e), -5.7 (o, 2C); IR (neat):  $\tilde{\nu}$  = 3061 (w), 2953 (w), 2927 (m), 2887 (w), 2856 (m), 1639 (w), 1601 (w), 1498 (w), 1471 (w), 1462 (w), 1446 (w), 1388 (w), 1360 (w), 1308 (w), 1252 (m), 1195 (w), 1093 (s), 1028 (w), 1005 (w), 975 (w), 938 (w), 913 (m), 834 (vs), 814 (w), 774 (s), 734 (w), 696 (s), 671 (m) cm<sup>-1</sup>; HRMS (CI(NH<sub>4</sub>)) calcd for (C<sub>19</sub>H<sub>32</sub>O<sub>2</sub>Si + H): 321.2244; found: 321.2251.

**Compound 18b.** A solution made of concentrated hydrochloric acid (100 μL) in methanol (5mL) and **18a** (1.06 mmol, 340 mg) was stirred at room temperature for 2 hours. The mixture was quenched with water and extracted with Et<sub>2</sub>O. The organic layer was dried over MgSO<sub>4</sub>, filtered and concentrated. Purification by flash column chromatography (pentane/Et<sub>2</sub>O = 4:1) afforded **18b** as a colourless oil (177 mg, 81%); <sup>1</sup>H NMR (500 MHz, CDCl<sub>3</sub>): δ = 7.38-7.32 (m, 4H), 7.26-7.21 (m, 1H), 5.49 (ddt, *J* = 17.2, 10.0, 7.2 Hz, 1H), 5.06-5.00 (m, 1H), 4.98-4.94 (m, 1H), 3.98

(dd, *J* = 11.1, 6.0 Hz, 1H), 3.88 (dd, *J* = 11.2, 6.5 Hz, 1H), 3.85 (d, *J* = 9.2 Hz, 1H), 3.67 (d, *J* = 9.2 Hz, 1H), 3.40 (s, 3H), 2.53 (t, *J* = 6.3 Hz, 1H (OH)), 2.50 (dt, *J* = 7.3, 1.1 Hz, 2H); <sup>13</sup>C NMR (125 MHz, CDCl<sub>3</sub>): δ = 141.6 (e), 133.7 (o), 128.3 (o, 2C), 126.7 (o, 2C), 126.3 (o), 117.6 (e), 77.8 (e), 68.6 (e), 59.2 (o), 46.4 (e), 39.0 (e); IR (neat):  $\tilde{\nu}$  = 3435 (br), 3061 (w), 2978 (w), 2924 (w), 2890 (w), 1638 (w), 1600 (w), 1581 (w), 1498 (w), 1478 (w), 1446 (m), 1415 (w), 1385 (w), 1297 (w), 1196 (m), 1157 (w), 1102 (s), 1037 (m), 1020 (m), 998 (m), 968 (w), 912 (s), 766 (m), 732 (m), 697 (vs), 674 (w) cm<sup>-1</sup>; HRMS (CI(NH<sub>4</sub>)) calcd for (C<sub>13</sub>H<sub>18</sub>O<sub>2</sub> + H): 207.1380; found: 207.1381.

**Compound 18.** This compound was obtained from **18b** (0.85 mmol, 175 mg) following the same

procedure as for the preparation of **1**. Colourless oil (148 mg, 85%). <sup>1</sup>H NMR (500 MHz, CDCl<sub>3</sub>): δ = 9.59 (s, 1H), 7.40-7.35 (m, 2H), 7.32-7.28 (m, 1H), 7.20-7.16 (m, 2H), 5.51 (ddt, *J* = 17.1, 10.0, 7.3 Hz, 1H), 5.10-5.01 (m, 2H), 3.98 (d, *J* = 9.3 Hz, 1H), 3.80 (d, *J* = 9.3 Hz, 1H), 3.36 (s, 3H), 2.79-2.71 (m, 2H); <sup>13</sup>C NMR (125 MHz, CDCl<sub>3</sub>): δ = 201.0 (o), 136.4 (e), 132.9 (o), 128.8 (o, 2C), 127.5 (o), 127.4 (o, 2C),

118.7 (e), 72.9 (e), 59.5 (o), 57.9 (e), 36.0 (e); IR (neat):  $\tilde{\nu}$  = 3076 (w), 2980 (w), 2925 (w), 2894 (w), 2822 (w), 1726 (vs), 1640 (w), 1599 (w), 1496 (m), 1448 (m), 1379 (w), 1193 (w), 1110 (vs), 1027 (m), 998 (m), 972 (m), 919 (m), 762 (m), 699 (vs) cm<sup>-1</sup>; HRMS (CI(NH<sub>4</sub>)) calcd for (C<sub>13</sub>H<sub>18</sub>O<sub>2</sub> + H): 205.1223; found: 205.1225.

## Preparation of compound *cis*-10a

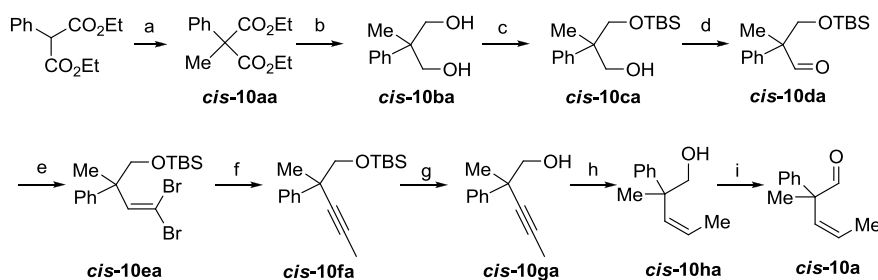

(a) i) NaH, THF; ii) MeI, 60%. (b) LiAlH<sub>4</sub>, Et<sub>2</sub>O, 0 °C, 68%. (c) TBSCl, imidazole, DMF, 79%. (d) (COCl)<sub>2</sub>, DMSO, Et<sub>3</sub>N, -78 °C, 94%. (e) PPh<sub>3</sub>, CBr<sub>4</sub>, CH<sub>2</sub>Cl<sub>2</sub>, 88%. (f) i) nBuLi, ii) MeI, THF, 94%. (g) nBu<sub>4</sub>NF (1M in THF), 51%. (h) Pd/BaSO<sub>4</sub>, H<sub>2</sub>, pyridine, 83%. (i) (COCl)<sub>2</sub>, DMSO, Et<sub>3</sub>N, -78 °C, .

**Compound *cis*-10aa.** Under a N<sub>2</sub> atmosphere, NaH (16.93 mmol, 677 mg, 60% I oil) was suspended in THF (42 mL) and cooled to 0 °C. Diethyl 2-phenylmalonate (8.47 mmol, 2.0 g) was added *via* syringe and stirred for 30 minutes at 0 °C. Methyl iodide (16.93 mmol, 1 mL) was added and the mixture was stirred for 48 hours at room temperature. The reaction was quenched with a saturated aqueous solution of ammonium chloride, extracted with Et<sub>2</sub>O, and the combined organic layers were dried over MgSO<sub>4</sub>, filtered and concentrated. Purification by flash column chromatography (petroleum ether/Et<sub>2</sub>O = 30:1) afforded ***cis*-10aa** as a colourless oil (1.27 g, 60%). <sup>1</sup>H NMR (500 MHz, CDCl<sub>3</sub>): δ = 7.39-7.31 (m, 4H), 7.29 (m, 1H), 4.29-4.19 (m, 4H), 1.86 (s, 3H), 1.25 (t, *J* = 7.2 Hz, 6H), in agreement with the previously reported data.<sup>13</sup>

**Compound *cis*-10ba.** This compound was obtained from ***cis*-10aa** (6.52 mmol, 1.62 g) following the same procedure as for the preparation of **1b**, except that 2.5 equiv. of LiAlH<sub>4</sub> (16.29 mmol, 619 mg) was used. White solid (731 mg, 68%); <sup>1</sup>H NMR (500 MHz, CDCl<sub>3</sub>): δ = 7.45-7.41 (m, 2H), 7.40-7.35 (m, 2H), 7.29-7.24 (m, 1H), 3.97 (dd, *J* = 11.0, 6.0 Hz, 2H), 3.84 (dd, *J* = 11.0, 5.9 Hz, 2H), 2.09 (t, *J* = 6.0 Hz, 2H), 1.31 (s, 3H), in agreement with the previously reported data.<sup>14</sup>

**Compound *cis*-10ca.** Imidazole (1.75 mmol, 119mg) was dissolved in DMF (22 mL) under N<sub>2</sub> atmosphere. Then, ***cis*-10ba** (1.75 mmol, 290 mg) was added in one portion and the mixture was stirred for 15 minutes, before adding *tert*-butyldimethylsilyl chloride (1.75 mmol, 264 mg) in one portion and the mixture was stirred until complete by TLC. The mixture was quenched with a saturated aqueous solution of ammonium chloride, extracted with Et<sub>2</sub>O (2 × 20 mL), and the combined organic layers were washed with water (2 × 40 mL) before drying over MgSO<sub>4</sub>, filtration and concentration. Purification by flash column chromatography (petroleum ether/Et<sub>2</sub>O = 9/1) afforded ***cis*-10ca** as a colourless oil (386 mg, 79%). <sup>1</sup>H NMR (500 MHz, CDCl<sub>3</sub>): δ = 7.43-7.38 (m, 2H), 7.37-7.31 (m, 2H), 7.26-7.21 (m, 1H), 4.02-3.96 (m, 2H), 3.70 (dd, *J* = 10.9, 6.5 Hz, 1H), 3.70 (d, *J* = 9.8 Hz, 1H), 2.57 (t, *J* = 6.1 Hz, 1H), 1.34 (s, 3H), 0.88 (s, 9H), 0.05 (s, 3H), 0.03 (s, 3H); <sup>13</sup>C NMR (125 MHz, CDCl<sub>3</sub>): δ = 143.6 (e), 128.1 (o, 2C), 126.5 (o, 2C), 126.3 (o), 70.3 (e), 69.9 (e), 44.2 (e), 25.7 (o, 3C), 20.1 (o), 18.0 (e), -5.8 (o, 2C); IR (neat):  $\tilde{\nu}$  = 3428 (br), 3060 (w), 2955 (m), 2929 (m), 2884 (w), 2857 (m), 1602 (w), 1498 (w), 1472 (m), 1464 (m), 1445 (w), 1389 (w), 1362 (w), 1253 (m), 1097 (m), 1043 (m), 1028 (m), 1006 (m), 964 (w), 939 (w), 910 (w), 833 (vs), 814 (m), 774 (s), 759 (m), 734 (w), 697 (s), 666 (m) cm<sup>-1</sup>; HRMS (CI(NH<sub>4</sub>)) calcd for (C<sub>16</sub>H<sub>28</sub>O<sub>2</sub>Si + H): 281.1931; found: 281.1937.

<sup>13</sup> H. Shimakoshi, M. Abiru, S.-i. Izumi, Y. Hisaeda, *Chem. Commun.* **2009**, 6427

<sup>14</sup> C. E. Katz, J. Aube, *J. Am. Chem. Soc.* **2003**, 125, 13948

**Compound *cis-10da*.** This compound was obtained from *cis-10ca* (1.77 mmol, 497 mg) following the same procedure as for the preparation of **1**. Colourless oil (463 mg, 94%). <sup>1</sup>H NMR (500 MHz, CDCl<sub>3</sub>): δ = 9.66 (s, 1H), 7.39-7.34 (m, 2H), 7.31-7.23 (m, 3H), 4.19 (d, *J* = 9.9 Hz, 1H), 3.84 (d, *J* = 9.9 Hz, 1H), 1.49 (s, 3H), 0.84 (s, 9H), 0.01 (s, 3H), -0.02 (s, 3H); <sup>13</sup>C NMR (125 MHz, CDCl<sub>3</sub>): δ = 201.9 (o), 138.5 (e), 128.5 (o, 2C), 127.2 (o), 127.0 (o, 2C), 67.2 (e), 55.7 (e), 25.6 (o, 3C), 18.0 (e), 17.4 (o), -5.8 (o), -5.9 (o); IR (neat):  $\tilde{\nu}$  = 3063 (w), 2955 (w), 2929 (w), 2886 (w), 2857 (w), 2711 (w), 1726 (m), 1601 (w), 1496 (w), 1472 (w), 1463 (w), 1446 (w), 1390 (w), 1362 (w), 1252 (m), 1187 (w), 1100 (s), 1075 (m), 1030 (w), 1006 (w), 964 (w), 939 (w), 917 (w), 832 (vs), 815 (m), 775 (s), 756 (m), 737 (w), 697 (s), 671 (m) cm<sup>-1</sup>; HRMS (CI(NH<sub>4</sub>)) calcd for (C<sub>16</sub>H<sub>26</sub>O<sub>2</sub>Si + H): 279.1775; found: 279.1769.

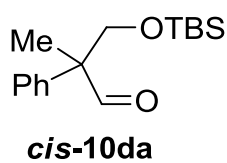

**Compound *cis-10ea*.** Under N<sub>2</sub> atmosphere, triphenyl phosphine (8.71 mmol, 2.28 g), carbon tetrabromide (4.35 mmol, 1.44 g) and *cis-10da* (2.18 mmol, 605 mg) were dissolved in CH<sub>2</sub>Cl<sub>2</sub> (4.4 mL) and stirred for 16 hours. The reaction was concentrated, and the residue was triturated using pentane. The filtrate was concentrated to afford an oil which was purified by flash column chromatography (pentane only) to afford *cis-10ea* as a colourless oil (835 mg, 88%). <sup>1</sup>H NMR (500 MHz, CDCl<sub>3</sub>): δ = 7.34-7.28 (m, 4H), 7.25-7.20 (m, 1H), 7.10 (s, 1H), 3.61 (d, *J* = 9.5 Hz, 1H), 3.43 (d, *J* = 9.5 Hz, 1H), 1.59 (s, 3H), 0.87 (s, 9H), -0.04 (s, 3H), -0.05 (s, 3H); <sup>13</sup>C NMR (125 MHz, CDCl<sub>3</sub>): δ = 143.5 (o), 143.0 (e), 128.1 (o, 2C), 127.3 (o, 2C), 126.3 (o), 89.3 (e), 72.7 (e), 49.3 (e), 25.8 (o, 3C), 20.2 (o), 18.2 (e), -5.6 (o, 2C); IR (neat):  $\tilde{\nu}$  = 3025 (w), 2953 (m), 2928 (m), 2896 (w), 2855 (m), 1603 (w), 1494 (w), 1470 (w), 1462 (w), 1445 (w), 1405 (w), 1387 (w), 1361 (w), 1283 (w), 1251 (m), 1230 (w), 1141 (w), 1095 (s), 1068 (s), 1029 (m), 1005 (m), 968 (m), 938 (w), 914 (w), 901 (w), 833 (vs), 774 (vs), 756 (m), 720 (w), 696 (s), 668 (m) cm<sup>-1</sup>; HRMS (CI(NH<sub>4</sub>)) calcd for (C<sub>17</sub>H<sub>26</sub><sup>79</sup>Br<sub>2</sub>OSi + H): 433.0192; found: 433.0185.

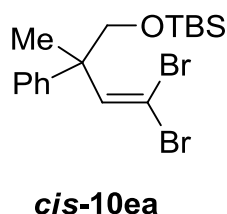

**Compound *cis-10fa*.** Under N<sub>2</sub> atmosphere, *cis-10ea* (1.87 mmol, 810 mg) was dissolved in THF (18 mL) and the mixture was cooled to -78 °C. *n*-Butyllithium (4.67 mmol, 1.87 mL, 2.5 M in hexanes) was added and the mixture was stirred for 1 hour at room temperature. The reaction was cooled to -78 °C, before adding methyl iodide (4.67 mmol, 290 μL) and the mixture was stirred at room temperature for 16 hours. The reaction was quenched with saturated aqueous solution of ammonium chloride, extracted with Et<sub>2</sub>O and the organic layer was then dried over MgSO<sub>4</sub>, filtered and concentrated. Purification by flash column chromatography (pentane/Et<sub>2</sub>O = 99/1) afforded *cis-10fa* as a colourless oil (503 mg, 94%); <sup>1</sup>H NMR (500 MHz, CDCl<sub>3</sub>): δ = 7.58-7.52 (m, 2H), 7.33-7.27 (m, 2H), 7.24-7.18 (m, 1H), 3.67 (d, *J* = 9.4 Hz, 1H), 3.62 (d, *J* = 9.4 Hz, 1H), 1.88 (s, 3H), 1.57 (s, 3H), 0.84 (s, 9H), -0.06 (s, 3H), -0.10 (s, 3H); <sup>13</sup>C NMR (125 MHz, CDCl<sub>3</sub>): δ = 143.9 (e), 127.8 (o, 2C), 127.0 (o, 2C), 126.4 (o), 83.5 (e), 78.5 (e), 72.4 (e), 42.3 (e), 25.8 (o, 3C), 24.6 (o), 18.3 (e), 3.6 (o), -5.6 (o, 2C); IR (neat):  $\tilde{\nu}$  = 3026 (w), 2954 (m), 2928 (m), 2856 (m), 1602 (w), 1496 (w), 1471 (m), 1463 (m), 1446 (w), 1381 (w), 1361 (m), 1291 (w), 1253 (m), 1191 (w), 1136 (m), 1100 (s), 1029 (m), 1006 (m), 955 (w), 939 (w), 855 (m), 834 (vs), 809 (m), 774 (vs), 760 (s), 697 (vs), 666 (m); HRMS (ESI) calcd for (C<sub>18</sub>H<sub>28</sub>OSi + Na): 311.1807; found: 311.1805; elemental analysis (%) calcd for C<sub>18</sub>H<sub>28</sub>OSi: C 74.94, H 9.78; found: C 74.93, H 9.80.

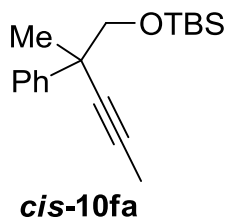

**Compound *cis-10ga*.** Under N<sub>2</sub> atmosphere, *cis-10fa* (0.694 mmol, 200 mg) was dissolved in THF (3.5 mL) and tetrabutylammonium fluoride (3.47 mmol, 3.5 mL, 1M solution in THF) was added and the mixture was stirred for 1 hour. The reaction was quenched with brine, extracted with Et<sub>2</sub>O, and the organic layer was dried over MgSO<sub>4</sub>, filtered and concentrated. Purification by flash column chromatography (petroleum ether/Et<sub>2</sub>O = 5/1) afforded *cis-10ga* as a colourless oil (71 mg, 51%); <sup>1</sup>H NMR (500 MHz,

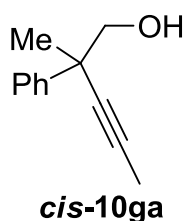

CDCl<sub>3</sub>):  $\delta$  = 7.56-7.51 (m, 2H), 7.38-7.32 (m, 2H), 7.28-7.23 (m, 1H), 3.68 (dd,  $J$  = 10.5, 6.4 Hz, 1H), 3.64 (dd,  $J$  = 10.5, 7.9 Hz, 1H), 1.93 (s, 3H), 1.79 (dd,  $J$  = 7.8, 6.4 Hz, 1H), 1.57 (s, 3H); <sup>13</sup>C NMR (125 MHz, CDCl<sub>3</sub>):  $\delta$  = 142.9 (e), 128.3 (o, 2C), 126.8 (o), 126.4 (o, 2C), 82.1 (e), 80.3 (e), 71.9 (e), 43.2 (e), 25.4 (o), 3.6 (o); IR (neat):  $\tilde{\nu}$  = 3414 (br), 3059 (w), 2974 (m), 2919 (m), 2872 (m), 1601 (w), 1494 (m), 1445 (m), 1382 (w), 1268 (w), 1048 (s), 1026 (s), 943 (w), 760 (s), 680 (vs) cm<sup>-1</sup>; HRMS (CI(NH<sub>4</sub>)) calcd for (C<sub>12</sub>H<sub>14</sub>O + NH<sub>4</sub>): 192.1383; found: 192.1386.

**Compound *cis*-10ha.** Under a N<sub>2</sub> atmosphere, *cis*-10ga (0.402 mmol, 70 mg), Pd/BaSO<sub>4</sub> (47 mg, 5% Pd), and pyridine (1.5 mL) were added together in a round bottom flask. The inert atmosphere was replaced with hydrogen by purging the reaction vessel three times. The reaction mixture stirred under a hydrogen atmosphere (balloon) for 16 hours. The crude reaction mixture was then absorbed on silica, and the plug of silica was then washed with Et<sub>2</sub>O during filtration. After concentration of the filtrate, *cis*-10ha was obtained as a colourless oil (59 mg, 83%). <sup>1</sup>H NMR (500 MHz, CDCl<sub>3</sub>):  $\delta$  = 7.42-7.37 (m, 2H), 7.36-7.29 (m, 2H), 7.24-7.19 (m, 1H), 5.68 (dq,  $J$  = 11.5, 1.5 Hz, 1H), 5.60 (dq,  $J$  = 11.5, 7.0 Hz, 1H), 3.66 (m, 2H), 1.50 (s, 3H), 1.31 (t,  $J$  = 6.8 Hz, 1H), 1.23 (dd,  $J$  = 7.0, 1.6 Hz, 3H); <sup>13</sup>C NMR (125 MHz, CDCl<sub>3</sub>):  $\delta$  = 145.6 (e), 135.6 (o), 128.3 (o, 2C), 127.1 (o), 127.0 (o, 2C), 126.0 (o), 72.6 (e), 45.6 (e), 23.4 (o), 14.8 (o); IR (neat):  $\tilde{\nu}$  = 3373 (br), 3057 (w), 3017 (w), 2965 (w), 2932 (w), 2872 (w), 1650 (w), 1600 (w), 1493 (m), 1444 (m), 1379 (w), 1255 (w), 1155 (w), 1036 (m), 1024 (m), 967 (w), 955 (w), 939 (w), 761 (m), 720 (w), 697 (vs), 671 (w), 654 (w) cm<sup>-1</sup>; HRMS (CI(NH<sub>4</sub>)) calcd for (C<sub>12</sub>H<sub>16</sub>O + NH<sub>4</sub>): 194.1539; found: 194.1541.

**Compound *cis*-10a.** This compound was obtained from *cis*-10ha (0.31 mmol, 55 mg) following the same procedure as for the preparation of **1**. Colourless oil (46 mg, 85%). <sup>1</sup>H NMR (500 MHz, CDCl<sub>3</sub>):  $\delta$  = 9.57 (s, 1H), 7.40-7.35 (m, 2H), 7.33-7.27 (m, 3H), 5.85-5.73 (m, 2H), 1.58 (s, 3H), 1.42 (dd,  $J$  = 6.8, 1.3 Hz, 3H); <sup>13</sup>C NMR (125 MHz, CDCl<sub>3</sub>):  $\delta$  = 198.9 (o), 140.8 (e), 130.9 (o), 129.5 (o), 128.8 (o, 2C), 127.4 (o, 2C), 127.1 (o), 56.3 (e), 22.1 (o), 15.1 (o); IR (neat):  $\tilde{\nu}$  = 3022 (w), 2980 (w), 2931 (w), 2812 (w), 2711 (w), 1724 (vs), 1598 (w), 1492 (m), 1445 (m), 1386 (w), 1075 (w), 1028 (w), 949 (w), 902 (w), 763 (m), 699 (s), 677 (w) cm<sup>-1</sup>; HRMS (CI(NH<sub>4</sub>)) calcd for (C<sub>12</sub>H<sub>14</sub>O + NH<sub>4</sub>): 192.1383; found: 192.1383.

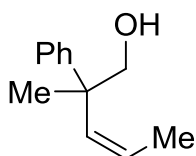

***cis*-10ha**

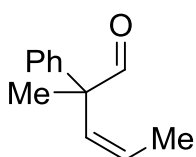

***cis*-10a**

### Preparation of [Rh(nbd)(DTBM-Segphos)]BF<sub>4</sub>{i.e. [Rh(nbd)(L1)]BF<sub>4</sub>}

To a 2-neck round-bottomed flask containing [Rh(nbd)<sub>2</sub>]BF<sub>4</sub> (143 mg, 0.38 mmol), *rac*-DTBM-SEGPHOS (410 mg, 0.35 mmol) and degassed CH<sub>2</sub>Cl<sub>2</sub> (8.7 mL) were added under N<sub>2</sub>, and the mixture was stirred for 1 hour at room temperature. The resultant red solution was concentrated, affording an orange precipitate that was collected by filtration, washed diethyl ether and dried in *vacuo* to give [Rh(nbd)(*rac*-DTBM-SEGPHOS)]BF<sub>4</sub> (462 mg, 91 %) as pale orange solid.

The purity of each batch of this pre-catalyst was assessed by elemental analysis (%) calcd for C<sub>81</sub>H<sub>108</sub>BF<sub>4</sub>O<sub>8</sub>P<sub>2</sub>Rh<sub>2</sub> (see below). All the batches performed equally well in the procedure described in this paper.

|         | Batch No 2 | Batch No 2 | Batch No 3 | Batch No 4 | Batch No 5 | Batch No 6 |
|---------|------------|------------|------------|------------|------------|------------|
| calcd   | found      | found      | found      | found      | found      | found      |
| C 66.57 | C 65.43    | C 65.34    | C 63.22    | C 63.46    | C 63.38    | C 65.39    |
| H 7.45  | H 7.54     | H 7.45     | H 7.25     | H 7.18     | H 7.18     | H 7.27     |



**Representative procedure for the rhodium-catalyzed isomerization** – [Rh(nbd)(rac-DTBM-SEGPPOS)]BF<sub>4</sub> (0.0085, 12.4 mg) was added to a flame-dried J-Young Schlenk flask under N<sub>2</sub>. Degassed acetone (1.7 mL) was added and the orange solution was hydrogenated by adding H<sub>2</sub> (1.64 mL) over 3 minutes *via* syringe. The resultant pale orange solution was sealed and stirred for 1 hour at room temperature. The solution was degassed by freeze-thaw method, before transferring *via* cannula to a second flame-dried J-Young Schlenk flask containing **1** (0.0847 mmol, 20 mg). The tube was sealed and the reaction was heated at 60 °C for 17 hours. The reaction mixture was cooled to room temperature, and the solvent was removed under reduced pressure. Purification by flash column chromatography (pentane/Et<sub>2</sub>O, 98:1) afforded **2** as colourless oil (17.4 mg, 86%).

| Compound   | Isolated Yield (%) | Isolated Yield (%) | Average yield (%)     |
|------------|--------------------|--------------------|-----------------------|
| <b>10a</b> | 77                 | 75                 | <b>76</b>             |
| <b>10b</b> | 76                 | 85                 | <b>81</b>             |
| <b>10c</b> | 93                 | 91                 | <b>92</b>             |
| <b>10d</b> | 85                 | 77                 | <b>81</b>             |
| <b>10e</b> | 80                 | 85                 | <b>83</b>             |
| <b>10f</b> | 77                 | 78                 | <b>78</b>             |
| <b>10g</b> | 98                 | 97                 | <b>98</b>             |
| <b>10h</b> | 88                 | 92                 | <b>90</b>             |
| <b>10i</b> | 63                 | -                  | <b>63<sup>a</sup></b> |
| <b>10j</b> | 78                 | 82                 | <b>80</b>             |
| <b>10k</b> | 73                 | 71                 | <b>72</b>             |
| <b>10l</b> | 75                 | 80                 | <b>78</b>             |
| <b>10m</b> | 75                 | 80                 | <b>78</b>             |
| <b>10n</b> | 83                 | 85                 | <b>84</b>             |
| <b>10o</b> | 75                 | 75                 | <b>75</b>             |

Table SI-1. Duplicate results from which the averages presented in Scheme 2 of the manuscript are derived.

Note: in the case of **10a**, **10b**, **10d**, **10j**, **10k**, **10l**, **10n** and **10o**, the yield of isolated product as indicated in table SI-1 were obtained after additional flash column chromatography on silica gel impregnated 10% silver nitrate (pentane/Et<sub>2</sub>O = 99:1) to remove minor traces of starting material. Also in the case of **10k** and **10o**, the reaction was carried out at room temperature.

## Analytical data for compounds 2, 5, 6, 8, and 10a–10o

**Compound 2.** <sup>1</sup>H NMR (500 MHz, CDCl<sub>3</sub>): δ = 9.88 (s, 1H), 7.39-7.27 (m, 6H), 7.17-7.11 (m, 4H), 6.21 (dq, *J* = 15.7, 1.6 Hz, 1H), 5.21 (dq, *J* = 15.7, 6.5 Hz, 1H), 1.81 (dd, *J* = 6.5, 1.7 Hz, 3H); <sup>13</sup>C NMR (125 MHz, CDCl<sub>3</sub>): δ = 197.8 (o), 139.9 (e, 2C), 131.2 (o), 130.8 (o), 129.6 (o, 4C), 128.5 (o, 4C), 127.3 (o, 2C), 66.8 (e), 18.5 (o); IR (neat):  $\tilde{\nu}$  = 3059 (w), 3030 (w), 2917 (w), 2854 (w), 2819 (w), 2721 (w), 1724 (s), 1597 (w), 1493 (m), 1446 (m), 1378 (w), 1186 (w), 1158 (w), 1119 (w), 1083 (w), 1034 (w), 1014 (w), 977 (m), 845 (w), 772 (w), 756 (m), 699 (vs), 659 (w) cm<sup>-1</sup>; HRMS (CI(CH<sub>4</sub>)) calcd for (C<sub>17</sub>H<sub>16</sub>O + H): 237.1275; found: 237.1279; elemental analysis (%) calcd for C<sub>17</sub>H<sub>16</sub>O: C 86.40, H 6.82; found: C 85.88, H 6.97.

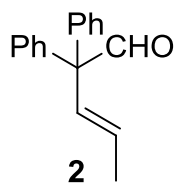

**Compound 5.** This compound was obtained from 3 (0.171 mmol, 30 mg) following the representative procedure described for the preparation of 2 with additional flash column chromatography on silica gel impregnated 10% silver nitrate (pentane/Et<sub>2</sub>O = 99:1) to remove minor traces of starting material. Colourless oil (23.4 mg, 78%); <sup>1</sup>H NMR (500 MHz, CDCl<sub>3</sub>): δ = 9.54 (s, 1H), 7.40-7.35 (m, 2H), 7.31-7.22 (m, 3H), 5.81 (dt, *J* = 15.8, 1.6 Hz, 1H), 5.63-5.55 (m, 1H), 1.81-1.77 (m, 2H), 1.51 (s, 3H); <sup>13</sup>C NMR (125 MHz, CDCl<sub>3</sub>): δ = 199.6 (o), 140.9 (e), 131.1 (o), 128.8 (o, 2C), 128.5 (o), 127.4 (o, 2C), 127.2 (o), 57.1 (e), 20.9 (o), 18.2 (e, *J* = 19.36 Hz, t); IR (neat):  $\tilde{\nu}$  = 3026 (w), 2980 (w), 2919 (w), 2810 (w), 2711 (w), 1722 (vs), 1599 (w), 1581 (w), 1492 (m), 1446 (m), 1424 (w), 1388 (w), 1369 (w), 1314 (w), 1270 (w), 1145 (w), 1076 (w), 1028 (m), 969 (m), 914 (w), 887 (w), 869 (w), 760 (s), 698 (vs) cm<sup>-1</sup>; HRMS (CI(NH<sub>4</sub>)) calcd for (C<sub>12</sub>H<sub>13</sub>DO + NH<sub>4</sub>): 193.1446; found: 193.1447.

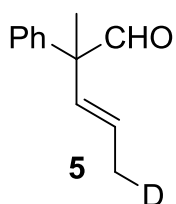

**Compound 6.** This compound was obtained from 4 (0.171 mmol, 30 mg) following the representative procedure described for the preparation of 2 with additional flash column chromatography on silica gel impregnated 10% silver nitrate (pentane/Et<sub>2</sub>O = 99:1) to remove minor traces of starting material. Colourless oil (23.6 mg, 78%); <sup>1</sup>H NMR (500 MHz, CDCl<sub>3</sub>): δ = 7.40-7.35 (m, 2H), 7.31-7.22 (m, 3H), 5.62-5.56 (m, 1H), 1.81 (d, *J* = 6.5 Hz, 3H), 1.51 (s, 3H); <sup>13</sup>C NMR (125 MHz, CDCl<sub>3</sub>): δ = 199.3 (e, t, *J* = 27.3 Hz), 141.0 (e), 130.7 (e, t, *J* = 23.7 Hz), 128.8 (o, 2C), 128.5 (o), 127.4 (o, 2C), 127.2 (o), 56.9 (e), 20.8 (o), 18.4 (o); IR (neat):  $\tilde{\nu}$  = 3059 (w), 3025 (w), 2979 (w), 2935 (w), 2855 (w), 2231 (w), 2107 (w), 2055 (w), 1711 (vs), 1599 (w), 1492 (m), 1446 (m), 1373 (m), 1157 (w), 1077 (w), 1048 (m), 1027 (w), 1011 (w), 895 (w), 796 (w), 759 (m), 699 (vs) cm<sup>-1</sup>; HRMS (CI(NH<sub>4</sub>)) calcd for (C<sub>12</sub>H<sub>12</sub>D<sub>2</sub>O + NH<sub>4</sub>): 194.1508; found: 194.1513.

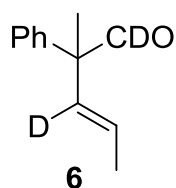

**Compound 8.** Colourless oil (18.6 mg, 93%); <sup>1</sup>H NMR (500 MHz, CDCl<sub>3</sub>): δ = 9.54 (s, 1H), 7.54 (d, *J* = 8.1 Hz, 1H), 7.33 (d, *J* = 8.3 Hz, 1H), 7.27-7.22 (m, 1H), 7.12-7.07 (m, 1H), 6.96 (s, 1H), 5.95 (dq, *J* = 15.7, 1.6 Hz, 1H), 5.60 (dq, *J* = 15.7, 6.5 Hz, 1H), 3.79 (s, 3H), 1.79 (dd, *J* = 6.5, 1.6 Hz, 3H), 1.61 (s, 3H); <sup>13</sup>C NMR (125 MHz, CDCl<sub>3</sub>): δ = 199.8 (o), 137.6 (e), 130.9 (o), 127.6 (o), 127.2 (o), 126.1 (e), 121.9 (o), 120.6 (o), 119.3 (o), 113.9 (e), 109.5 (o), 52.7 (e), 32.9 (o), 20.5 (o), 18.4 (o); IR (neat):  $\tilde{\nu}$  = 3049 (w), 2965 (w), 2933 (w), 2880 (w), 2805 (w), 2703 (w), 1718 (s), 1615 (w), 1541 (w), 1483 (m), 1466 (m), 1449 (m), 1425 (w), 1373 (m), 1329 (m), 1251 (m), 1233 (w), 1150 (w), 1136 (w), 1101 (w), 1078 (w), 1049 (w), 1017 (w), 967 (m), 926 (w), 905 (w), 810 (w), 786 (w), 737 (vs), 674 (w) cm<sup>-1</sup>; HRMS (CI(CH<sub>4</sub>)) calcd for (C<sub>15</sub>H<sub>17</sub>NO + H): 228.1383; found: 228.1378.

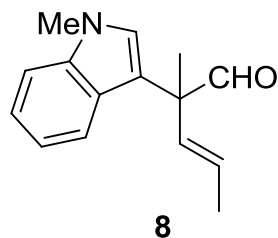

**Compound 10a.** Colourless oil.  $^1\text{H}$  NMR (500 MHz,  $\text{CDCl}_3$ ):  $\delta$  = 9.54 (s, 1H), 7.40-7.35 (m, 2H), 7.31-7.22 (m, 3H), 5.81 (dq,  $J$  = 15.8, 1.6 Hz, 1H), 5.60 (dq,  $J$  = 15.8, 6.4 Hz, 1H), 1.81 (dd,  $J$  = 6.4, 1.7 Hz, 3H), 1.51 (s, 3H);  $^{13}\text{C}$  NMR (125 MHz,  $\text{CDCl}_3$ ):  $\delta$  = 199.6 (o), 141.0 (e), 131.1 (o), 128.8 (o, 2C), 128.6 (o), 127.5 (o, 2C), 127.3 (o), 57.1 (e), 20.9 (o), 18.5 (o); IR (neat):  $\tilde{\nu}$  = 3026 (w), 2979 (w), 2935 (w), 2856 (w), 2810 (w), 2712 (w), 1725 (vs), 1599 (w), 1582 (w), 1492 (m), 1446 (m), 1389 (w), 1149 (w), 1076 (w), 1028 (w), 970 (m), 917 (w), 839 (w), 786 (w), 760 (m), 700 (s)  $\text{cm}^{-1}$ ; HRMS (CI( $\text{CH}_4$ )) calcd for ( $\text{C}_{12}\text{H}_{14}\text{O} + \text{H}$ ): 175.1117; found: 175.1120; elemental analysis (%) calcd for  $\text{C}_{12}\text{H}_{14}\text{O}$ : C 82.72, H 8.10; found: C 82.71, H 8.44.

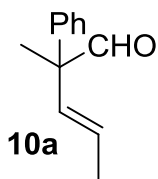

**Compound 10b.** Colourless oil.  $^1\text{H}$  NMR (500 MHz,  $\text{CDCl}_3$ ):  $\delta$  = 9.49 (s, 1H), 7.18-7.14 (m, 2H), 6.93-6.88 (m, 2H), 5.82-5.75 (m, 1H), 5.57 (dq,  $J$  = 15.8, 6.5 Hz, 1H), 3.80 (s, 3H), 1.80 (dd,  $J$  = 6.4, 1.6 Hz, 3H), 1.48 (s, 3H);  $^{13}\text{C}$  NMR (125 MHz,  $\text{CDCl}_3$ ):  $\delta$  = 199.7 (o), 158.7 (e), 132.7 (e), 131.4 (o), 128.6 (o, 2C), 128.2 (o), 114.2 (o, 2C), 56.3 (e), 55.3 (o), 20.9 (o), 18.5 (o); IR (neat):  $\tilde{\nu}$  = 3077 (w), 2978 (w), 2914 (w), 2708 (w), 1720 (vs), 1638 (m), 1607 (m), 1579 (m), 1510 (vs), 1461 (m), 1431 (w), 1416 (w), 1383 (w), 1296 (m), 1245 (vs), 1184 (vs), 1137 (w), 1118 (w), 1079 (w), 996 (s), 970 (s), 911 (vs), 826 (vs), 728 (m)  $\text{cm}^{-1}$ ; HRMS (CI( $\text{NH}_4$ )) calcd for ( $\text{C}_{13}\text{H}_{16}\text{O}_2 + \text{H}$ ): 205.1223; found: 205.1231.

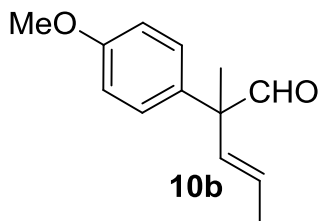

**Compound 10c.** Colourless oil.  $^1\text{H}$  NMR (500 MHz,  $\text{CDCl}_3$ ):  $\delta$  = 9.50 (s, 1H), 7.36-7.32 (m, 2H), 7.19-7.15 (m, 2H), 5.75 (dq,  $J$  = 15.7, 1.5 Hz, 1H), 5.59 (dq,  $J$  = 15.8, 6.4 Hz, 1H), 1.80 (dd,  $J$  = 6.4, 1.6 Hz, 3H), 1.49 (s, 3H);  $^{13}\text{C}$  NMR (125 MHz,  $\text{CDCl}_3$ ):  $\delta$  = 199.1 (o), 139.4 (e), 133.3 (e), 130.6 (o), 129.1 (o), 128.93 (o, 2C), 128.91 (o, 2C), 56.7 (e), 20.9 (o), 18.5 (o); IR (neat):  $\tilde{\nu}$  = 3028 (w), 2979 (w), 2936 (w), 2918 (w), 2812 (w), 2855 (w), 2712 (w), 1722 (vs), 1594 (w), 1492 (m), 1449 (w), 1402 (w), 1314 (w), 1186 (w), 1147 (w), 1096 (s), 1057 (w), 1013 (s), 970 (s), 916 (w), 824 (s), 785 (w), 757 (m), 720 (m), 680 (w)  $\text{cm}^{-1}$ ; HRMS (CI( $\text{NH}_4$ )) calcd for ( $\text{C}_{12}\text{H}_{13}^{35}\text{ClO} + \text{NH}_4$ ): 226.0993; found: 226.0991.

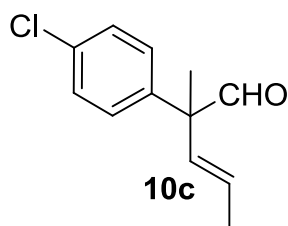

**Compound 10d.** Colourless oil.  $^1\text{H}$  NMR (500 MHz,  $\text{CDCl}_3$ ):  $\delta$  = 9.63 (s, 1H), 7.87-7.80 (m, 3H), 7.71-7.67 (m, 1H), 7.52-7.46 (m, 2H), 7.35 (dd,  $J$  = 8.6, 1.9 Hz, 1H), 5.91 (dq,  $J$  = 15.8, 1.6 Hz, 1H), 5.64 (dq,  $J$  = 15.8, 6.5 Hz, 1H), 1.85 (dd,  $J$  = 6.5, 1.7 Hz, 3H), 1.60 (s, 3H);  $^{13}\text{C}$  NMR (125 MHz,  $\text{CDCl}_3$ ):  $\delta$  = 199.7 (o), 138.4 (e), 133.4 (e), 132.4 (e), 131.1 (o), 128.9 (o), 128.5 (o), 128.0 (o), 127.5 (o), 126.3 (o, 2C), 126.2 (o), 125.5 (o), 57.3 (e), 21.0 (o), 18.6 (o); IR (neat):  $\tilde{\nu}$  = 3056 (w), 2978 (w), 2935 (w), 2811 (w), 2709 (w), 1725 (vs), 1632 (w), 1599 (w), 1506 (w), 1449 (w), 1377 (w), 1274 (w), 1130 (w), 1061 (w), 970 (m), 894 (w), 857 (m), 818 (m), 747 (m), 658 (w)  $\text{cm}^{-1}$ ; HRMS (CI( $\text{NH}_4$ )) calcd for ( $\text{C}_{16}\text{H}_{16}\text{O} + \text{H}$ ): 225.1235; found: 225.1280.

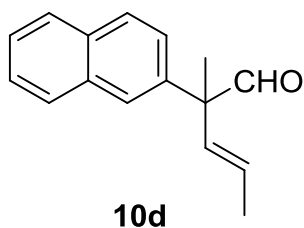

**Compound 10e.** Colourless oil.  $^1\text{H}$  NMR (500 MHz,  $\text{CDCl}_3$ ):  $\delta$  = 9.57 (s, 1H), 7.53 (s, 1H), 7.51-7.48 (m, 1H), 7.48-7.45 (m, 1H), 7.32-7.28 (m, 1H), 7.23-7.19 (m, 1H), 5.85 (dq,  $J$  = 15.8, 1.6 Hz, 1H), 5.63 (dq,  $J$  = 15.7, 6.5 Hz, 1H), 1.79 (dd,  $J$  = 6.5, 1.6 Hz, 3H), 1.61 (s, 3H);  $^{13}\text{C}$  NMR (125 MHz,  $\text{CDCl}_3$ ):  $\delta$  = 198.9 (o), 155.9 (e), 142.4 (o), 129.3 (o), 129.1 (o), 126.0 (e), 124.5 (o), 122.6 (o), 121.3 (o), 120.7 (e), 111.8 (o), 51.9 (e), 20.1 (o), 18.3 (o); IR (neat):  $\tilde{\nu}$  = 3031 (w), 2973 (w), 2937 (w), 2855 (w), 2810 (w), 2712 (w), 1726 (s), 1615 (w), 1568 (w), 1453 (m), 1379 (w), 1330 (w), 1281 (w), 1265 (w), 1207 (w), 1158 (w), 1110 (w), 1097 (m), 1017 (m), 968 (m), 931 (w), 907 (w), 858 (m), 810 (w), 786 (w), 768 (w), 745 (vs), 710 (w), 668 (w)  $\text{cm}^{-1}$ ; HRMS (CI( $\text{NH}_4$ )) calcd for ( $\text{C}_{14}\text{H}_{14}\text{O}_2 + \text{H}$ ): 215.1067; found: 215.1065.

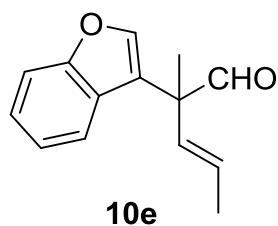

**Compound 10f.** Colourless oil.  $^1\text{H}$  NMR (500 MHz,  $\text{CDCl}_3$ ):  $\delta$  = 9.46 (s, 1H), 7.27-7.18 (m, 3H), 7.11-7.06 (m, 2H), 5.49 (dq,  $J$  = 16.6, 5.5 Hz, 1H), 5.45-5.41 (m, 1H), 2.95 (d,  $J$  = 13.5 Hz, 1H), 2.83 (d,  $J$  = 13.6 Hz, 1H), 1.73 (dd,  $J$  = 5.7, 1.0 Hz, 3H), 1.09 (s, 3H);  $^{13}\text{C}$  NMR (125 MHz,  $\text{CDCl}_3$ ):  $\delta$  = 202.6 (o), 136.8 (e), 131.2 (o), 130.4 (o, 2C), 128.2 (o), 128.0 (o, 2C), 126.4 (o), 52.9 (e), 42.2 (e), 18.4 (o), 18.3 (o); IR (neat):  $\tilde{\nu}$  = 3063 (w), 3029 (w), 2967 (w), 2929 (w), 2806 (w), 2705 (w), 1721 (s), 1604 (w), 1496 (m), 1453 (m), 1377 (w), 1320 (w), 1184 (w), 1068 (w), 1031 (w), 970 (m), 912 (w), 872 (w), 781 (m), 734 (m), 700 (vs)  $\text{cm}^{-1}$ ; HRMS (CI( $\text{NH}_4$ )) calcd for ( $\text{C}_{13}\text{H}_{16}\text{O} + \text{NH}_4$ ): 206.1539; found: 206.1542.

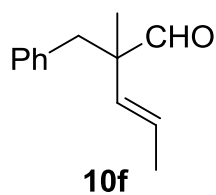

**Compound 10g.** Colourless oil.  $^1\text{H}$  NMR (500 MHz,  $\text{CDCl}_3$ ):  $\delta$  = 9.35 (s, 1H), 5.49 (dq,  $J$  = 15.8, 6.2 Hz, 1H), 5.39 (dq,  $J$  = 15.8, 1.4 Hz, 1H), 1.81-1.74 (m, 2H), 1.73 (dd,  $J$  = 6.2, 1.3 Hz, 3H), 1.71-1.62 (m, 3H), 1.52-1.45 (m, 1H), 1.30-1.19 (m, 2H), 1.12 (tt,  $J$  = 12.9, 3.5 Hz, 1H), 1.07-0.91 (m, 2H), 1.05 (s, 3H);  $^{13}\text{C}$  NMR (125 MHz,  $\text{CDCl}_3$ ):  $\delta$  = 203.6 (o), 130.9 (o), 127.7 (o), 55.3 (e), 42.7 (o), 27.9 (e), 27.0 (e), 26.8 (e), 26.7 (e), 26.5 (e), 18.5 (o), 13.9 (o); IR (neat):  $\tilde{\nu}$  = 2925 (s), 2853 (s), 2696 (w), 1725 (vs), 1449 (s), 1396 (w), 1376 (w), 1350 (w), 1322 (w), 1270 (w), 1203 (w), 1011 (w), 970 (s), 931 (w), 907 (m), 846 (w), 782 (w), 659  $\text{cm}^{-1}$ ; HRMS (CI( $\text{NH}_4$ )) calcd for ( $\text{C}_{12}\text{H}_{20}\text{O} + \text{H}$ ): 181.1587; found: 181.1589.

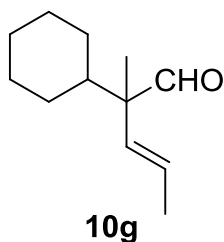

**Compound 10h.** Colourless oil.  $^1\text{H}$  NMR (500 MHz,  $\text{CDCl}_3$ ):  $\delta$  = 9.64 (s, 1H), 7.38-7.33 (m, 2H), 7.31-7.22 (m, 3H), 5.78 (dq,  $J$  = 16.0, 1.6 Hz, 1H), 5.50 (dq,  $J$  = 16.0, 6.5 Hz, 1H), 4.12 (d,  $J$  = 9.9 Hz, 1H), 4.08 (d,  $J$  = 9.9 Hz, 1H), 1.78 (dd,  $J$  = 6.5, 1.7 Hz, 3H), 0.81 (s, 9H), -0.04 (s, 3H), -0.06 (s, 3H);  $^{13}\text{C}$  NMR (125 MHz,  $\text{CDCl}_3$ ):  $\delta$  = 200.2 (o), 138.1 (e), 130.4 (o), 128.6 (o, 2C), 128.4 (o, 2C), 127.3 (o), 66.4 (e), 62.5 (e), 25.7 (o, 3C), 18.7 (o), 18.1 (e), -5.75 (o), -5.78 (o); IR (neat):  $\tilde{\nu}$  = 3027 (w), 2954 (m), 2928 (m), 2884 (w), 2856 (m), 2714 (w), 1724 (s), 1600 (w), 1494 (w), 1471 (w), 1463 (w), 1447 (w), 1389 (w), 1361 (w), 1253 (m), 1187 (w), 1105 (s), 1022 (w), 1006 (w), 971 (m), 938 (w), 836 (vs), 815 (w), 776 (s), 757 (m), 698 (s), 672 (w)  $\text{cm}^{-1}$ ; HRMS (CI( $\text{NH}_4$ )) calcd for ( $\text{C}_{18}\text{H}_{28}\text{O}_2\text{Si} + \text{H}$ ): 305.1931; found: 305.1940.

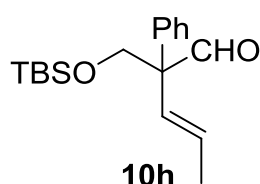

**Compound 10j.** Colourless oil.  $^1\text{H}$  NMR (500 MHz,  $\text{CDCl}_3$ ):  $\delta$  = 9.51 (s, 1H), 7.38-7.34 (m, 2H), 7.30-7.25 (m, 1H), 7.24-7.20 (m, 2H), 5.75 (dq,  $J$  = 16.1, 1.5 Hz, 1H), 5.52 (dq,  $J$  = 16.0, 6.4 Hz, 1H), 5.02-4.96 (m, 1H), 2.70 (d,  $J$  = 7.1 Hz, 2H), 1.80 (dd,  $J$  = 6.4, 1.5 Hz, 3H), 1.62 (s, 3H), 1.48 (s, 3H);  $^{13}\text{C}$  NMR (125 MHz,  $\text{CDCl}_3$ ):  $\delta$  = 199.6 (o), 139.3 (e), 134.4 (e), 130.1 (o), 129.8 (o), 128.5 (o, 2C), 128.4 (o, 2C), 127.1 (o), 118.8 (o), 60.9 (e), 33.5 (e), 25.8 (o), 18.7 (o), 17.9 (o); IR (neat):  $\tilde{\nu}$  = 3026 (w), 2967 (w), 2916 (w), 2856 (w), 2715 (w), 1722 (vs), 1599 (w), 1494 (m), 1447 (m), 1377 (m), 1108 (w), 1027 (w), 972 (m), 838 (w), 760 (m), 699 (vs)  $\text{cm}^{-1}$ ; HRMS (CI( $\text{NH}_4$ )) calcd for ( $\text{C}_{16}\text{H}_{20}\text{O} + \text{H}$ ): 229.1587; found: 229.1589.

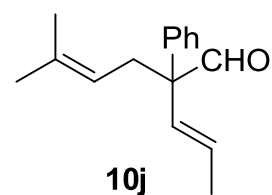

**Compound 10k.** Colourless oil.  $^1\text{H}$  NMR (500 MHz,  $\text{CDCl}_3$ ):  $\delta$  = 9.47 (s, 1H), 7.40-7.34 (m, 2H), 7.31-7.25 (m, 1H), 7.24-7.19 (m, 2H), 5.79-5.68 (m, 2H), 5.55 (dq,  $J$  = 16.0, 6.4 Hz, 1H), 5.00-4.90 (m, 2H), 2.07-1.90 (m, 4H), 1.82 (dd,  $J$  = 6.4, 1.7 Hz, 3H), 1.30-1.14 (m, 2H);  $^{13}\text{C}$  NMR (125 MHz,  $\text{CDCl}_3$ ):  $\delta$  = 199.1 (o), 139.4 (e), 138.4 (o), 130.1 (o), 129.8 (o), 128.7 (o, 2C), 128.2 (o, 2C), 127.2 (o), 114.8 (e), 60.7 (e), 34.16 (e), 34.15 (e), 23.6 (e), 18.7 (o); IR (neat):  $\tilde{\nu}$  = 3061 (w), 3025 (w), 2939 (m), 2856 (w), 2809 (w), 2715 (w), 1722 (vs), 1640 (w), 1599 (w), 1493 (m), 1446 (m), 1378 (w), 1309 (w), 1084 (w), 1032 (w), 973 (m), 910 (m), 838 (w), 759 (m), 700 (s)  $\text{cm}^{-1}$ ; HRMS (CI( $\text{NH}_4$ )) calcd for ( $\text{C}_{16}\text{H}_{20}\text{O} + \text{H}$ ): 229.1587; found: 229.1592.

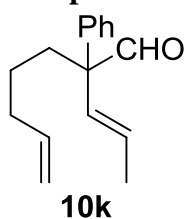

**Compound 10l.** Colourless oil.  $^1\text{H NMR}$  (500 MHz,  $\text{CDCl}_3$ ):  $\delta$  = 9.52 (s, 1H), 7.22-7.14 (m, 4H), 5.96 (ddt,  $J$  = 16.9, 10.1, 6.8 Hz, 1H), 5.80 (dq,  $J$  = 15.8, 1.6 Hz, 1H), 5.58 (dq,  $J$  = 15.8, 6.5 Hz, 1H), 5.12-5.06 (m, 2H), 3.38 (d,  $J$  = 6.8 Hz, 2H), 1.80 (dd,  $J$  = 6.5, 1.7 Hz, 3H), 1.49 (s, 3H);  $^{13}\text{C NMR}$  (125 MHz,  $\text{CDCl}_3$ ):  $\delta$  = 199.7 (o), 139.1 (e), 138.6 (e), 137.1 (o), 131.2 (o), 129.0 (o, 2C), 128.4 (o), 127.5 (o, 2C), 116.0 (e), 56.8 (e), 39.7 (e), 20.8 (o), 18.5 (o); IR (neat):  $\tilde{\nu}$  = 3079 (w), 3025 (w), 2978 (w), 2917 (w), 2854 (w), 2808 (w), 2710 (w), 1725 (vs), 1638 (m), 1510 (m), 1448 (w), 1435 (w), 1378 (w), 1297 (w), 1188 (w), 1148 (w), 1116 (w), 1088 (w), 1060 (w), 1038 (w), 1019 (m), 992 (w), 969 (m), 913 (s), 840 (m), 805 (m), 744 (w), 716 (w), 662 (w)  $\text{cm}^{-1}$ ; HRMS (CI( $\text{NH}_4$ )) calcd for ( $\text{C}_{15}\text{H}_{18}\text{O} + \text{H}$ ): 215.1430; found: 215.1439.

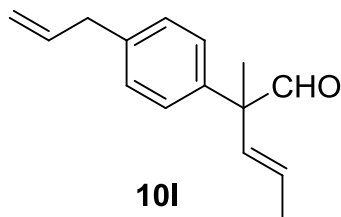

**Compound 10m.** Colourless oil.  $^1\text{H NMR}$  (500 MHz,  $\text{CDCl}_3$ ):  $\delta$  = 9.49 (s, 1H), 7.17-7.12 (m, 2H), 6.94-6.89 (m, 2H), 6.05 (ddt,  $J$  = 17.3, 10.6, 5.3 Hz, 1H), 5.78 (dq,  $J$  = 15.8, 1.6 Hz, 1H), 5.57 (dq,  $J$  = 15.8, 6.4 Hz, 1H), 5.41 (dq,  $J$  = 17.3, 1.6 Hz, 1H), 5.29 (dq,  $J$  = 10.5, 1.4 Hz, 1H), 4.53 (dt,  $J$  = 5.3, 1.5 Hz, 2H), 1.80 (dd,  $J$  = 6.5, 1.7 Hz, 3H), 1.48 (s, 3H);  $^{13}\text{C NMR}$  (125 MHz,  $\text{CDCl}_3$ ):  $\delta$  = 199.7 (o), 157.8 (e), 133.2 (o), 132.8 (e), 131.4 (o), 128.6 (o, 2C), 128.2 (o), 117.7 (e), 115.0 (o, 2C), 68.8 (e), 56.3 (e), 20.9 (o), 18.5 (o); IR (neat):  $\tilde{\nu}$  = 3025 (w), 2978 (w), 2934 (w), 2857 (w), 2809 (w), 2711 (w), 1723 (vs), 1649 (w), 1606 (m), 1579 (m), 1508 (vs), 1453 (m), 1426 (w), 1384 (w), 1367 (w), 1294 (m), 1246 (vs), 1228 (w), 1182 (s), 1154 (w), 1114 (w), 1060 (w), 1021 (s), 996 (m), 970 (s), 922 (s), 827 (vs), 727 (m), 661 (w)  $\text{cm}^{-1}$ ; HRMS (CI( $\text{NH}_4$ )) calcd for ( $\text{C}_{15}\text{H}_{18}\text{O}_2 + \text{H}$ ): 231.1380; found: 231.1388.

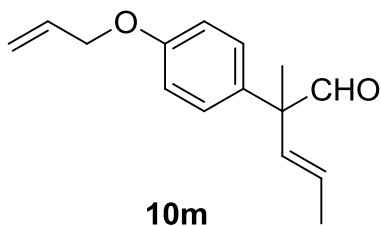

**Compound 10n.** Colourless oil.  $^1\text{H NMR}$  (500 MHz,  $\text{CDCl}_3$ ):  $\delta$  = 9.51 (s, 1H), 7.52-7.47 (m, 2H), 7.27-7.23 (m, 2H), 7.18-7.14 (m, 2H), 7.08-7.04 (m, 2H), 5.77 (dq,  $J$  = 15.9, 1.6 Hz, 1H), 5.73 (ddt,  $J$  = 16.9, 10.4, 6.5 Hz, 1H), 5.58 (dq,  $J$  = 15.8, 6.5 Hz, 1H), 5.11-5.03 (m, 2H), 4.17-4.13 (m, 2H), 2.43 (s, 3H), 1.80 (dd,  $J$  = 6.5, 1.6 Hz, 3H), 1.48 (s, 3H);  $^{13}\text{C NMR}$  (125 MHz,  $\text{CDCl}_3$ ):  $\delta$  = 199.2 (o), 143.5 (e), 140.4 (e), 138.3 (e), 135.5 (e), 132.7 (o), 130.8 (o), 129.5 (o, 2C), 128.9 (o, 2C), 128.8 (o), 128.0 (o, 2C), 127.7 (o, 2C), 118.8 (e), 56.8 (e), 53.5 (e), 21.5 (o), 20.8 (o), 18.5 (o); IR (neat):  $\tilde{\nu}$  = 3028 (w), 2973 (w), 2954 (w), 2926 (w), 2854 (w), 2807 (w), 2709 (w), 1722 (s), 1646 (m), 1504 (m), 1452 (w), 1433 (w), 1404 (w), 1382 (w), 1339 (s), 1305 (m), 1222 (m), 1162 (w), 1107 (vs), 1091 (w), 1060 (m), 1036 (w), 1018 (m), 1008 (w), 976 (m), 920 (m), 864 (m), 842 (w), 814 (m), 800 (w), 786 (w), 766 (m), 746 (w), 710 (m), 656 (s)  $\text{cm}^{-1}$ ; HRMS (CI( $\text{NH}_4$ )) calcd for ( $\text{C}_{22}\text{H}_{25}\text{NO}_3\text{S} + \text{H}$ ): 384.1628; found: 384.1639.

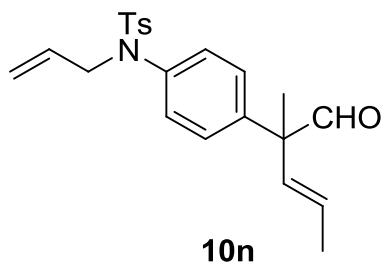

**Compound 10o.** Colourless oil.  $^1\text{H NMR}$  (500 MHz,  $\text{CDCl}_3$ ):  $\delta$  = 9.49 (s, 1H), 7.18-7.14 (m, 2H), 7.00-6.96 (m, 2H), 5.83-5.75 (m, 2H), 5.57 (dq,  $J$  = 15.8, 6.5 Hz, 1H), 5.28 (ddt,  $J$  = 17.0, 1.8, 1.7 Hz, 1H), 5.10 (ddt,  $J$  = 10.0, 1.7, 1.6 Hz, 1H), 4.70 (t,  $J$  = 2.1 Hz, 2H), 3.03-3.00 (m, 2H), 1.80 (dd,  $J$  = 6.5, 1.6 Hz, 3H), 1.48 (s, 3H);  $^{13}\text{C NMR}$  (125 MHz,  $\text{CDCl}_3$ ):  $\delta$  = 199.6 (o), 157.0 (e), 133.4 (e), 131.9 (o), 131.4 (o), 128.6 (o, 2C), 128.2 (o), 116.4 (e), 115.2 (o, 2C), 84.7 (e), 77.1 (e), 56.4 (e, 2C), 23.1 (e), 20.9 (o), 18.5 (o); IR (neat):  $\tilde{\nu}$  = 2979 (w), 2918 (w), 2812 (w), 2712 (w), 2252 (w), 1724 (s), 1642 (w), 1606 (m), 1580 (w), 1508 (vs), 1450 (m), 1417 (w), 1376 (m), 1296 (m), 1262 (w), 1222 (s), 1182 (s), 1138 (w), 1114 (w), 1050 (w), 1010 (s), 970 (m), 910 (s), 807 (w), 724 (vs)  $\text{cm}^{-1}$ ; HRMS (CI( $\text{NH}_4$ )) calcd for ( $\text{C}_{18}\text{H}_{20}\text{O}_2 + \text{H}$ ): 269.1536; found: 269.1546.

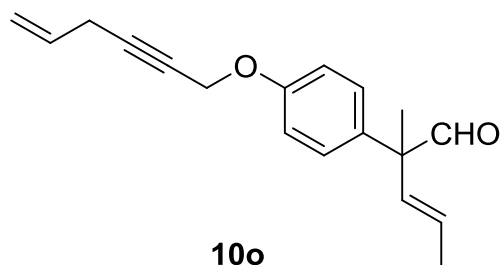

## Analytical data for compounds **12** and **14**

**Compound 12.** This compound was obtained from **11** (0.106 mmol, 20 mg) following the representative procedure described for the preparation of **2**. Purification by flash column chromatography (pentane/Et<sub>2</sub>O = 19:1) enabled isolation of **12** as colourless oil (4.5 mg, 23%), besides recovered **11** (13 mg, 67%). <sup>1</sup>H NMR (500 MHz, CDCl<sub>3</sub>): δ = 7.40-7.36 (m, 2H), 7.35-7.30 (m, 2H), 7.24-7.20 (m, 1H), 2.63 (ddd, *J* = 18.0, 7.0, 2.3 Hz, 1H), 2.44-2.33 (m, 1H), 2.30 (ddd, *J* = 12.7, 6.1, 2.3 Hz, 1H), 2.04-1.96 (m, 2H), 1.42 (s, 3H), 1.18 (d, *J* = 6.4 Hz, 3H); <sup>13</sup>C NMR (125 MHz, CDCl<sub>3</sub>): δ = 220.4 (e), 144.5 (e), 128.3 (o, 2C), 126.4 (o), 126.2 (o, 2C), 54.0 (e), 47.9 (e), 47.4 (e), 27.6 (o), 24.9 (o), 20.5 (o); IR (neat):  $\tilde{\nu}$  = 3058 (w), 3025 (w), 2956 (m), 2926 (m), 2869 (w), 1735 (vs), 1601 (w), 1495 (m), 1457 (w), 1444 (m), 1405 (w), 1378 (w), 1369 (w), 1315 (w), 1298 (w), 1256 (m), 1225 (w), 1187 (w), 1147 (m), 1119 (w), 1076 (w), 1053 (m), 1029 (m), 932 (w), 912 (w), 839 (w), 760 (s), 698 (vs) cm<sup>-1</sup>; HRMS (CI(NH<sub>4</sub>)) calcd for (C<sub>13</sub>H<sub>16</sub>O + NH<sub>4</sub>): 206.1539; found: 206.1543.

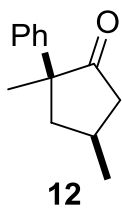

**Compound 14.** This compound was obtained from **13** (0.106 mmol, 20 mg) following the representative procedure described for the preparation of **2**, except that the active catalyst was prepared from [Rh(nbd)(**L1**)]BF<sub>4</sub> (0.0212 mmol, 31.1 mg) with H<sub>2</sub> (4.1 mL). <sup>1</sup>H NMR of the crude indicated a conversion of **13** to **14** of only 40%. Attempts to purify by flash column chromatography using 10% AgNO<sub>3</sub> impregnated silica (pentane/Et<sub>2</sub>O = 90:1) increased the ratio of **13/14** to 1:2. Compound **14** could also be prepared independently by Julia-Kocienski olefination. <sup>1</sup>H NMR (500 MHz, CDCl<sub>3</sub>): δ = 9.54 (s, 1H), 7.40-7.35 (m, 2H), 7.31-7.23 (m, 3H), 5.78 (dt, *J* = 15.9, 1.5 Hz, 1H), 5.63 (dt, *J* = 15.9, 6.3 Hz, 1H), 2.20-2.13 (m, 2H), 1.51 (s, 3H), 1.04 (t, *J* = 7.5 Hz, 3H); <sup>13</sup>C NMR (125 MHz, CDCl<sub>3</sub>): δ = 199.6 (o), 141.1 (e), 135.5 (o), 128.9 (o), 128.8 (o, 2C), 127.5 (o, 2C), 127.2 (o), 56.9 (e), 26.1 (e), 21.0 (o), 13.6 (o); IR (neat):  $\tilde{\nu}$  = 3059 (w), 3025 (w), 2965 (w), 2933 (w), 2873 (w), 2809 (w), 2710 (w), 1724 (s), 1599 (w), 1581 (w), 1492 (m), 1446 (m), 1388 (w), 1370 (w), 1334 (w), 1187 (w), 1156 (w), 1108 (w), 1076 (w), 1027 (m), 974 (m), 936 (w), 906 (w), 845 (w), 822 (w), 760 (s), 698 (vs) cm<sup>-1</sup>; HRMS (CI(NH<sub>4</sub>)) calcd for (C<sub>13</sub>H<sub>16</sub>O + H): 189.1274; found: 189.1276.

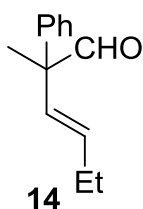

## Preparation of compound 17 and isolation of transient intermediate 16

**Compound 17.** This compound was obtained from **15** (0.0933 mmol, 20 mg) following the representative procedure described for the preparation of **2**. Colourless oil (19.3 mg, 97%).  $^1\text{H}$  NMR (500 MHz,  $\text{CDCl}_3$ ):  $\delta$  = 7.32-7.28 (m, 4H), 7.24-7.19 (m, 1H), 5.59 (dq, 15.7, 6.3 Hz, 1H), 5.51-5.46 (m, 1H), 2.63 (ddd,  $J$  = 18.5, 7.3, 2.5 Hz, 1H), 2.49 (ddd,  $J$  = 12.7, 5.7, 2.5 Hz, 1H), 2.42-2.30 (m, 1H), 1.97-1.89 (m, 2H), 1.74 (dd,  $J$  = 6.3, 1.4 Hz, 3H), 1.17 (d,  $J$  = 6.5 Hz, 3H);  $^{13}\text{C}$  NMR (125 MHz,  $\text{CDCl}_3$ ):  $\delta$  = 217.3 (e), 142.9 (e), 132.1 (o), 128.2 (o, 2C), 127.2 (o, 2C), 127.1 (o), 126.5 (o), 61.7 (e), 47.0 (e), 46.1 (e), 27.5 (o), 20.2 (o), 18.1 (o); IR (neat):  $\tilde{\nu}$  = 3059 (w), 3025 (w), 2955 (m), 2870 (w), 1739 (vs), 1600 (w), 1496 (m), 1447 (m), 1405 (w), 1378 (w), 1351 (w), 1319 (w), 1272 (w), 1237 (w), 1189 (w), 1146 (s), 1112 (w), 1079 (w), 1034 (w), 970 (s), 922 (w), 910 (w), 840 (w), 759 (s), 697 (vs)  $\text{cm}^{-1}$ ; HRMS (CI( $\text{NH}_4$ )) calcd for ( $\text{C}_{15}\text{H}_{18}\text{O} + \text{H}$ ): 215.1430; found: 215.1431.

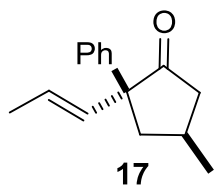

The formation of transient intermediate **16** could be observed by following the reaction at room temperature using  $^1\text{H}$  NMR. By stopping the reaction before its completion, **16** could be isolated after purification by flash column chromatography on silica gel impregnated with 10%  $\text{AgNO}_3$  (pentane/ $\text{Et}_2\text{O}$  = 99:1). Colourless oil (7.2 mg, 36%).  $^1\text{H}$  NMR (500 MHz,  $\text{CDCl}_3$ ):  $\delta$  = 9.49 (s, 1H), 7.38-7.33 (m, 2H), 7.30-7.24 (m, 3H), 5.83 (dq,  $J$  = 16.1, 1.6 Hz, 1H), 5.54 (dq,  $J$  = 16.1, 6.4 Hz, 1H), 4.76-4.74 (m, 1H), 4.56-4.54 (m, 1H), 2.81 (d,  $J$  = 14.3 Hz, 1H), 2.76 (d,  $J$  = 14.4 Hz, 1H), 1.80 (dd,  $J$  = 6.4, 1.7 Hz, 3H), 1.46 (s, 3H);  $^{13}\text{C}$  NMR (125 MHz,  $\text{CDCl}_3$ ):  $\delta$  = 198.7 (o), 141.3 (e), 139.1 (e), 130.1 (o), 130.0 (o), 128.6 (o, 2C), 128.4 (o, 2C), 127.3 (o), 115.2 (e), 60.3 (e), 43.1 (e), 24.5 (o), 18.7 (o); IR (neat):  $\tilde{\nu}$  = 3075 (w), 3027 (w), 2967 (w), 2917 (w), 2855 (w), 2811 (w), 2717 (w), 1722 (vs), 1644 (w), 1599 (w), 1494 (w), 1447 (m), 1376 (m), 1317 (w), 1238 (w), 1188 (w), 1083 (w), 1029 (w), 974 (m), 894 (m), 758 (m), 700 (s)  $\text{cm}^{-1}$ ; HRMS (CI( $\text{NH}_4$ )) calcd for ( $\text{C}_{15}\text{H}_{18}\text{O} + \text{H}$ ): 215.1430; found: 215.1433.

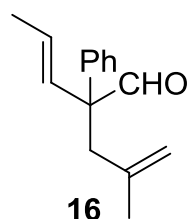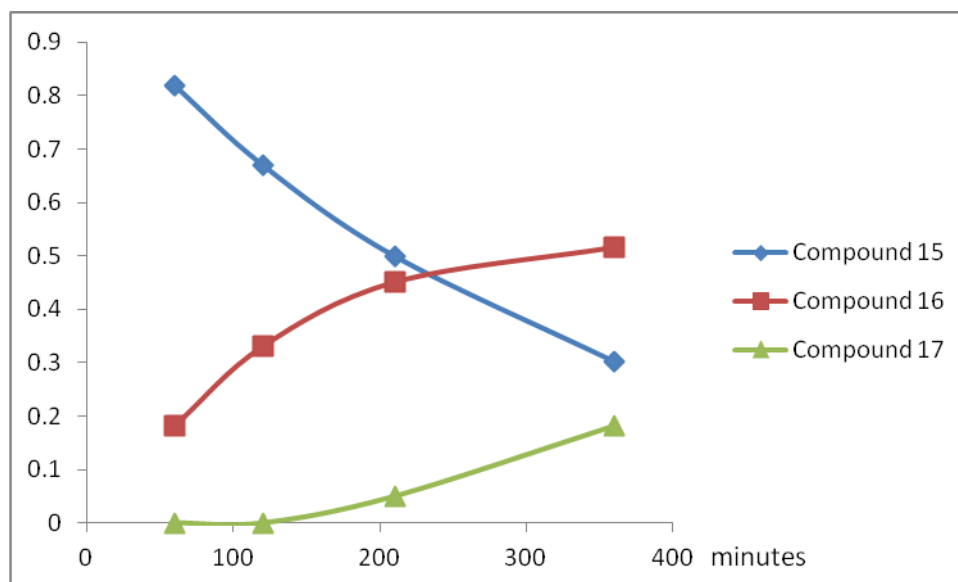

Figure SI-1. Ratios of **15/16/17** in the reaction at r.t. as measured by  $^1\text{H}$  NMR

## Supplementary examples of isomerization/hydroacylation tandem

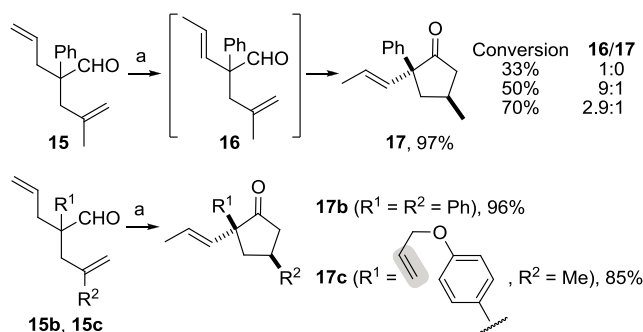

(a)  $[\text{Rh}(\pm)\text{-L1}]\text{BF}_4$  (10 mol%), acetone, 60 °C, 17h. The reaction of **15c** was performed at room temperature.

**Compound 15b.** Colourless oil.  $^1\text{H}$  NMR (500 MHz,  $\text{CDCl}_3$ ):  $\delta$  = 9.39 (s, 1H), 7.31-7.25 (m, 2H), 7.23-7.14 (m, 6H), 7.14-7.10 (m, 2H), 5.48 (dddd,  $J$  = 17.1, 10.2, 7.5, 6.9 Hz, 1H), 5.18 (d,  $J$  = 1.6 Hz, 1H), 4.98 (ddt,  $J$  = 10.2, 2.1, 1.0 Hz, 1H), 4.94-4.88 (m, 2H), 3.24 (dd,  $J$  = 14.3, 0.9 Hz, 1H), 3.15 (dd,  $J$  = 14.3, 0.9 Hz, 1H), 2.71-2.61 (m, 2H);  $^{13}\text{C}$  NMR (125 MHz,  $\text{CDCl}_3$ ):  $\delta$  = 200.8 (o), 144.8 (e), 142.1 (e), 137.7 (e), 132.7 (o), 128.4 (o, 2C), 127.9 (o, 2C), 127.7 (o, 2C), 127.2 (o), 127.1 (o), 126.6 (o, 2C), 118.8 (e), 118.0 (e), 57.4 (e), 38.1 (e), 36.2 (e); IR (neat):  $\tilde{\nu}$  = 3079 (w), 3057 (w), 3024 (w), 2979 (w), 2921 (w), 2807 (w), 2714 (w), 1805 (w), 1720 (s), 1638 (w), 1626 (w), 1599 (w), 1574 (w), 1549 (w), 1494 (m), 1444 (m), 1386 (w), 1304 (w), 1261 (w), 1157 (w), 1075 (w), 1028 (w), 995 (w), 906 (s), 876 (m), 840 (w), 778 (s), 761 (m), 733 (m), 695 (vs), 666 (w)  $\text{cm}^{-1}$ ; HRMS (CI( $\text{NH}_4$ )) calcd for ( $\text{C}_{20}\text{H}_{20}\text{O} + \text{H}$ ): 277.1587; found: 277.1586.

**Compound 15c.** Colourless oil.  $^1\text{H}$  NMR (500 MHz,  $\text{CDCl}_3$ ):  $\delta$  = 9.50 (s, 1H), 7.16-7.12 (m, 2H), 6.94-6.90 (m, 2H), 6.05 (ddt,  $J$  = 17.3, 10.6, 5.3 Hz, 1H), 5.58 (ddt,  $J$  = 17.1, 10.2, 7.1 Hz, 1H), 5.41 (dq,  $J$  = 17.3, 1.6 Hz, 1H), 5.29 (dq,  $J$  = 10.5, 1.4 Hz, 1H), 5.09-5.03 (m, 2H), 4.85-4.82 (m, 1H), 4.67-4.65 (m, 1H), 4.53 (dt,  $J$  = 5.3, 1.5 Hz, 2H), 2.82-2.75 (m, 1H), 2.74-2.63 (m, 3H), 1.43 (s, 3H);  $^{13}\text{C}$  NMR (125 MHz,  $\text{CDCl}_3$ ):  $\delta$  = 201.8 (o), 157.8 (e), 141.2 (e), 133.12 (o), 133.07 (o), 130.0 (e), 128.9 (o, 2C), 118.8 (e), 117.8 (e), 115.5 (e), 114.9 (o, 2C), 68.8 (e), 56.1 (e), 40.6 (e), 36.5 (e), 24.3 (o); IR (neat):  $\tilde{\nu}$  = 3418 (w), 3077 (w), 2979 (w), 2919 (w), 2714 (w), 1719 (s), 1641 (m), 1607 (m), 1579 (m), 1509 (vs), 1453 (m), 1425 (m), 1376 (w), 1293 (m), 1246 (s), 1185 (s), 1120 (w), 1020 (m), 995 (s), 919 (s), 896 (w), 827 (s), 728 (w)  $\text{cm}^{-1}$ ; HRMS (CI( $\text{NH}_4$ )) calcd for ( $\text{C}_{18}\text{H}_{22}\text{O}_2 + \text{H}$ ): 271.1693; found: 271.1691; elemental analysis (%) calcd for  $\text{C}_{18}\text{H}_{22}\text{O}_2$ : C 79.96, H 8.20; found: C 80.03, H 8.23.

**Compound 17b.** This compound was obtained from **15b** (0.072 mmol, 20 mg) following the representative procedure described for the preparation of **2**. Colourless oil (19.3 mg, 96%).  $^1\text{H}$  NMR (500 MHz,  $\text{CDCl}_3$ ):  $\delta$  = 7.39-7.29 (m, 8H), 7.28-7.22 (m, 2H), 5.71 (dq,  $J$  = 15.7, 6.4 Hz, 1H), 5.60-5.55 (m, 1H), 3.58-3.49 (m, 1H), 2.92 (ddd,  $J$  = 18.5, 7.6, 2.6 Hz, 1H), 2.77 (ddd,  $J$  = 12.8, 5.8, 2.6 Hz, 1H), 2.51 (dd,  $J$  = 14.5, 12.3 Hz, 1H), 2.47 (dd,  $J$  = 12.3, 8.6 Hz, 1H), 1.81 (dd,  $J$  = 6.4, 1.5 Hz, 3H);  $^{13}\text{C}$  NMR (125 MHz,  $\text{CDCl}_3$ ):  $\delta$  = 215.8 (e), 142.7 (e), 142.4 (e), 131.7 (o), 128.7 (o, 2C), 128.3 (o, 2C), 127.7 (o), 127.2 (o, 2C), 126.83 (o, 2C), 126.77 (o, 2C), 61.5 (e), 46.1 (e), 45.1 (e), 37.8 (o), 18.2 (o); IR (neat):  $\tilde{\nu}$  = 3058 (w), 3026 (w), 2915 (w), 1736 (vs), 1600 (m), 1496 (m), 1446 (m), 1404 (w), 1377 (w), 1302 (w), 1266 (w), 1205 (w), 1175 (w), 1148 (w), 1114 (m), 1083 (w), 1032 (w), 969 (m), 913 (w), 843 (w), 757 (s), 697 (vs)  $\text{cm}^{-1}$ ; HRMS (ESI) calcd for ( $\text{C}_{20}\text{H}_{20}\text{O} + \text{Na}$ ): 299.1412; found: 299.1408; elemental analysis (%) calcd for  $\text{C}_{20}\text{H}_{20}\text{O}$ : C 86.92, H 7.29; found: C 86.39, H 7.35.



**Compound 17c.** This compound was obtained from **15c** (0.074 mmol, 20 mg) following the representative procedure described for the preparation of **2**. Colourless oil (16.9 mg, 85%).

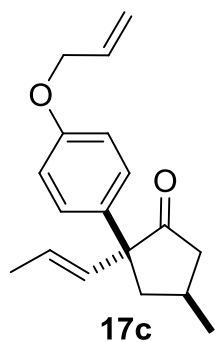

$^1\text{H}$  NMR (500 MHz,  $\text{CDCl}_3$ ):  $\delta$  = 7.24-7.20 (m, 2H), 6.88-6.85 (m, 2H), 6.04 (ddt,  $J$  = 17.2, 10.6, 5.3 Hz, 1H), 5.55 (dq,  $J$  = 15.7, 6.3 Hz, 1H), 5.48-5.42 (m, 1H), 5.40 (dq,  $J$  = 17.3, 1.6 Hz, 1H), 5.29-5.25 (m, 1H), 4.51 (dt,  $J$  = 5.3, 1.5 Hz, 2H), 2.61 (ddd,  $J$  = 18.5, 7.3, 2.5 Hz, 1H), 2.45 (ddd,  $J$  = 12.7, 5.7, 2.5 Hz, 1H), 2.40-2.27 (m, 1H), 1.95-1.87 (m, 2H), 1.73 (dd,  $J$  = 6.3, 1.4 Hz, 3H), 1.16 (d,  $J$  = 6.5 Hz, 3H);  $^{13}\text{C}$  NMR (125 MHz,  $\text{CDCl}_3$ ):  $\delta$  = 217.7 (e), 157.3 (e), 135.1 (e), 133.4 (o), 132.3 (o), 128.3 (o, 2C), 126.8 (o), 117.6 (e), 114.4 (o, 2C), 68.8 (e), 61.1 (e), 46.9 (e), 46.0 (e), 27.4 (o), 20.2 (o), 18.1 (o); IR (neat):  $\tilde{\nu}$  = 3025 (w), 2953 (m), 2925 (m), 2869 (m), 2335 (w), 2087 (w), 1737 (vs), 1649 (w), 1608 (m), 1579 (w), 1508 (vs), 1456 (m), 1425 (m), 1406 (m), 1378 (m), 1292 (m), 1244 (s), 1182 (s), 1147 (m), 1115 (m), 1080 (w), 1023 (s), 996 (s), 972 (s), 922 (s), 825 (s), 776 (w), 729 (w), 670 (w), 661 (w)  $\text{cm}^{-1}$ ; HRMS (CI( $\text{NH}_4$ )) calcd for ( $\text{C}_{18}\text{H}_{22}\text{O}_2 + \text{H}$ ): 271.1693; found: 271.1703.

## Preparation of compounds (±)-19, (R)-19, (±)-20, (S,S)-20, (S)-21, (R)-22, and (S)-23

**Compound (±)-19.** This compound was obtained from **18** (0.196 mmol, 40 mg) following the representative procedure described for the preparation of **2**. Colourless oil (34.4 mg, 86%). <sup>1</sup>H NMR (500 MHz, CDCl<sub>3</sub>): δ = 7.41-7.37 (m, 2H), 7.35-7.31 (m, 2H), 7.27-7.23 (m, 1H), 3.72 (d, *J* = 9.1 Hz, 1H), 3.44 (d, *J* = 9.2 Hz, 1H), 3.29 (s, 3H), 2.56-2.45 (m, 2H), 2.37-2.23 (m, 2H), 2.03-1.95 (m, 1H), 1.83-1.73 (m, 1H); <sup>13</sup>C NMR (125 MHz, CDCl<sub>3</sub>): δ = 218.7 (e), 138.2 (e), 128.6 (o, 2C), 127.1 (o), 126.8 (o, 2C), 77.7 (e), 59.3 (o), 58.0 (e), 38.4 (e), 31.8 (e), 18.8 (e); IR (neat):  $\tilde{\nu}$  = 2927 (w), 2886 (m), 1738 (vs), 1599 (w), 1497 (m), 1447 (m), 1404 (w), 1378 (w), 1314 (w), 1194 (m), 1157 (m), 1106 (s), 1047 (w), 984 (w), 937 (w), 908 (w), 811 (w), 759 (m), 700 (s) cm<sup>-1</sup>; HRMS (CI(NH<sub>4</sub>)) calcd for (C<sub>13</sub>H<sub>16</sub>O<sub>2</sub> + H): 205.1223; found: 205.1225; Chiral HPLC analysis (25 cm × 4.6 mm Chiralpak AD-H column), 2% isopropanol-hexane at 1 mL/min. flow rate, 230 nm; t<sub>R</sub> (49.5%) 7.6 min., t<sub>R</sub> (50.5%) 8.3 min.

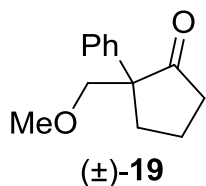

**Compound (±)-20.** This compound was obtained in the same reaction as side product. Colourless oil (2.1 mg, 5%); <sup>1</sup>H NMR (500 MHz, CDCl<sub>3</sub>): δ = 7.43-7.38 (m, 2H), 7.35-7.30 (m, 2H), 7.26-7.22 (m, 1H), 3.63 (d, *J* = 9.2 Hz, 1H), 3.45 (d, *J* = 9.2 Hz, 1H), 3.49-3.34 (m, 1H), 3.33 (s, 3H), 2.80 (t, *J* = 10.7 Hz, 1H), 2.04 (dd, *J* = 11.0, 7.6 Hz, 1H), 1.12 (d, *J* = 7.6 Hz, 3H); <sup>13</sup>C NMR (125 MHz, CDCl<sub>3</sub>): δ = 214.2 (e), 139.2 (e), 128.4 (o, 2C), 127.0 (o), 126.5 (o, 2C), 78.2 (e), 70.2 (e), 59.3 (o), 51.0 (o), 30.4 (e), 14.2 (o); IR (neat):  $\tilde{\nu}$  = 3058 (w), 2926 (m), 2871 (m), 2825 (m), 1775 (vs), 1600 (w), 1494 (m), 1447 (m), 1370 (w), 1267 (w), 1197 (w), 1173 (w), 1105 (vs), 1070 (w), 1028 (w), 962 (m), 913 (w), 762 (m), 730 (w), 700 (s) cm<sup>-1</sup>; HRMS (CI(NH<sub>4</sub>)) calcd for (C<sub>13</sub>H<sub>16</sub>O<sub>2</sub> + NH<sub>4</sub>): 222.1495; found: 222.1495.

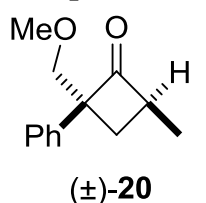

**Compound (R)-19.** [Rh(nbd)<sub>2</sub>]BF<sub>4</sub> (0.0245, 9.2 mg) and (–)-(R)-L1 (10 mmol%, 28.9 mg) were added to a flame-dried J-Young Schlenk flask under N<sub>2</sub>. Degassed acetone (4.9 mL) was added and the orange solution was hydrogenated over 3 minutes *via* syringe (9.5 mL). The resultant pale orange solution was sealed and stirred for 1 hour at room temperature. The solution was degassed by the freeze-thaw method, before before being transferred *via* cannula to a second flame-dried J-Young Schlenk flask containing **18** (0.245 mmol, 50 mg). The tube was sealed and the reaction was stirred at room temperature for 17 hours. The solvent was removed under reduced pressure. Purification by flash column chromatography (petroleum ether/Et<sub>2</sub>O, 99:1) afforded (R)-19 as colourless oil (26 mg, 52%). [ $\alpha$ ]<sub>D</sub><sup>20</sup> = +83° (*c* = 1, CHCl<sub>3</sub>); Chiral HPLC analysis (25 cm × 4.6 mm Chiralpak AD-H column), 2% isopropanol-hexane at 1 mL/min. flow rate, 230 nm; t<sub>R</sub> (*major*) 7.9 min., t<sub>R</sub> (*minor*) 8.8 min., 96:4 enantiomeric ratio.

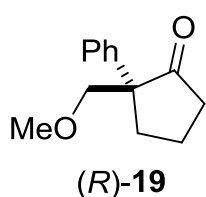

The absolute configuration of (R)-19 was assigned by comparison with similar compounds.

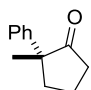

P. Nilsson, M. Larhed, A. Hallberg, *J. Am. Chem. Soc.* **2003**, *125*, 3430

e.r. = 98:2

[ $\alpha$ ]<sub>D</sub><sup>20</sup> = +54°

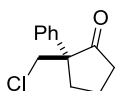

Q. Yin, S.-Y. You, *Org. Lett.* **2014**, *16*, 1810

e.r. = 98:2

[ $\alpha$ ]<sub>D</sub><sup>20</sup> = +85°

Compounds (*S*)-**21** and (*S,S*)-**20** were isolated from the same reaction as inseparable mixture and their ratio was determined by <sup>1</sup>H NMR (20.5 mg, 41%). The alcohol (*R*)-**22** could be isolated as clean product after reduction of the mixture with LiAlH<sub>4</sub>. **SI-1** was not isolated.

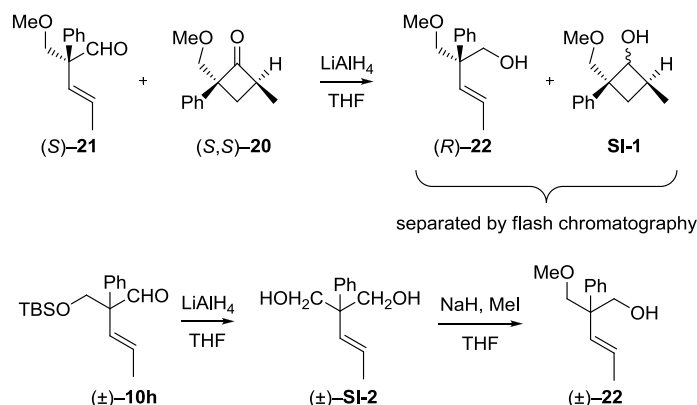

**Compound (*R*)-22.** <sup>1</sup>H NMR (500 MHz, CDCl<sub>3</sub>): δ = 7.39-7.31 (m, 4H), 7.26-7.21 (m, 1H), 5.59-5.54 (m, 1H), 5.48 (dq, *J* = 15.9, 6.1 Hz, 1H), 4.05 (dd, *J* = 11.1, 6.5 Hz, 1H), 3.94 (dd, *J* = 11.1, 5.3 Hz, 1H), 3.83 (d, *J* = 9.2 Hz, 1H), 3.77 (d, *J* = 9.2 Hz, 1H), 3.38 (s, 3H), 2.46 (t, *J* = 6.1 Hz, 1H), 1.74 (dd, *J* = 6.1, 1.3 Hz, 3H); <sup>13</sup>C NMR (125 MHz, CDCl<sub>3</sub>): δ = 142.1 (e), 133.1 (o), 128.3 (o, 2C), 127.5 (o, 2C), 126.8 (o), 126.6 (o), 78.6 (e), 68.3 (e), 59.4 (o), 50.1 (e), 18.5 (o); IR (neat):  $\tilde{\nu}$  = 3425 (br), 3056 (w), 3027 (w), 2918 (w), 2882 (w), 1600 (w), 1495 (m), 1447 (m), 1377 (w), 1248 (w), 1194 (m), 1103 (s), 1038 (m), 1021 (m), 970 (s), 927 (w), 761 (s), 697 (vs) cm<sup>-1</sup>; HRMS (CI(NH<sub>4</sub>)) calcd for (C<sub>13</sub>H<sub>18</sub>O<sub>2</sub> + H): 207.1380; found: 207.1377, [ $\alpha$ ]<sub>D</sub><sup>20</sup> = -11° (*c* = 1, CHCl<sub>3</sub>); Chiral HPLC analysis (25 cm x 4.6 mm Chiralpak AD-H column), 2% isopropanol-hexane at 1 mL/min. flow rate, 230 nm; *t*<sub>R</sub> (*major*) 10.9 min., *t*<sub>R</sub> (*minor*) 12.1 min., 98.5:1.5 enantiomeric ratio.

**Compound (*±*)-SI-2.** A solution of **10h** (0.12 mmol, 37 mg) in THF (1.2 mL) was added under N<sub>2</sub> to a suspension of LiAlH<sub>4</sub> (0.18 mmol, 7 mg) at 0 °C. After stirring at room temperature for 30 minutes, another portion of LiAlH<sub>4</sub> (0.18 mmol, 7 mg) was added. After stirring for 30 minutes, the TBS group was cleaved and the reaction mixture was quenched carefully at 0 °C by a dropwise addition of a saturated aqueous solution of sodium sulfate. The white precipitate was filtered over celite pad and the filtrate was evaporated under reduced pressure. Purification by flash chromatography (petroleum ether/Et<sub>2</sub>O = 4:1) afforded (*±*)-**SI-2** as a colourless oil (20 mg, 87%); <sup>1</sup>H NMR (500 MHz, CDCl<sub>3</sub>): δ = 7.39-7.33 (m, 4H), 7.28-7.23 (m, 1H), 5.62-5.53 (m, 2H), 4.05 (d, *J* = 11.1 Hz, 2H), 3.96 (d, *J* = 11.1 Hz, 2H), 2.09 (br s, 2H), 1.78 (d, *J* = 4.7 Hz, 3H); <sup>13</sup>C NMR (125 MHz, CDCl<sub>3</sub>): δ = 141.5 (e), 132.6 (o), 128.6 (o, 2C), 128.0 (o), 127.7 (o, 2C), 126.9 (o), 67.7 (e, 2C), 51.1 (e), 18.6 (o); IR (neat):  $\tilde{\nu}$  = 3288 (br), 3027 (w), 2931 (m), 2881 (w), 2357 (w), 2342 (w), 2325 (w), 1600 (w), 1493 (m), 1445 (m), 1374 (w), 1256 (w), 1159 (w), 1047 (s), 1015 (s), 980 (m), 908 (w), 837 (w), 761 (m), 733 (m), 696 (vs) cm<sup>-1</sup>; HRMS (CI(NH<sub>4</sub>)) calcd for (C<sub>12</sub>H<sub>16</sub>O<sub>2</sub> + NH<sub>4</sub>): 210.1489; found: 210.1498.

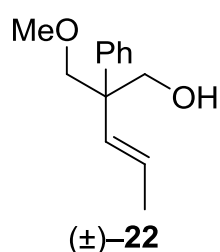

**Compound (*±*)-22.** Under a N<sub>2</sub> atmosphere, NaH (0.078 mmol, 3.1 mg, 60% dispersion in oil) was suspended in THF (1 mL) and the mixture was cooled to 0 °C. (*±*)-**SI-2** (0.078 mmol, 15 mg) in THF (0.5 mL) was added *via* syringe and was stirred to room temperature for 15 minutes. Methyl iodide (0.078 mmol, 5 μL) was added and the reaction was stirred at room temperature for 1 hour. The reaction mixture was quenched with a saturated aqueous solution of ammonium chloride and extracted with Et<sub>2</sub>O. The organic layer was dried over MgSO<sub>4</sub>, filtered and concentrated. Purification

by flash column chromatography (petroleum ether/Et<sub>2</sub>O = 98:1) afforded ( $\pm$ )-**22** as a colourless oil (4.5 mg, 28%); <sup>1</sup>H NMR (500 MHz, CDCl<sub>3</sub>):  $\delta$  = 7.39-7.31 (m, 4H), 7.26-7.21 (m, 1H), 5.59-5.54 (m, 1H), 5.48 (dq,  $J$  = 15.9, 6.1 Hz, 1H), 4.05 (dd,  $J$  = 11.1, 6.5 Hz, 1H), 3.94 (dd,  $J$  = 11.1, 5.3 Hz, 1H), 3.83 (d,  $J$  = 9.2 Hz, 1H), 3.77 (d,  $J$  = 9.2 Hz, 1H), 3.38 (s, 3H), 2.46 (t,  $J$  = 6.1 Hz, 1H), 1.74 (dd,  $J$  = 6.1, 1.3 Hz, 3H); Chiral HPLC analysis (25 cm x 4.6 mm Chiralpak AD-H column), 2% isopropanol-hexane at 1 mL/min. flow rate, 230 nm;  $t_R$  (50%) 10.95 min.,  $t_R$  (50%) 12.0 min.

**Compound (S)-23.** Triethylamine (0.29 mmol, 40  $\mu$ L) was added to (**R**)-**22** (0.15 mmol, 30 mg), dissolved in CH<sub>2</sub>Cl<sub>2</sub> (1.4 mL) and stirred for 5 minutes, before adding 3,5-dinitrobenzoyl chloride (0.29 mmol, 67 mg) at room temperature which was stirred for a further 20 minutes. The reaction was quenched with saturated ammonium chloride, extracted in Et<sub>2</sub>O, dried over magnesium sulfate, filtered and concentrated. The crude was purified by flash column chromatography (pentane/Et<sub>2</sub>O = 9:1) afforded a white solid (49 mg, 84%); which was recrystallized by dissolving (**S**)-**23** in a minimal amount of EtOAc, then layering hexane (EtOAc/hexane = 1:3 ratio) which was left on the bench for two days

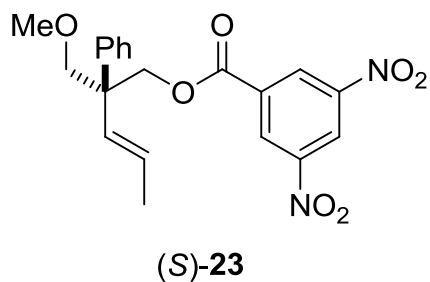

to obtain white crystals. Melting point = 68-70 °C; <sup>1</sup>H NMR (500 MHz, CDCl<sub>3</sub>):  $\delta$  = 9.19 (t,  $J$  = 2.2 Hz, 1H), 9.01 (d,  $J$  = 2.2 Hz, 2H), 7.41-7.34 (m, 4H), 7.29-7.25 (m, 1H), 5.71 (dq,  $J$  = 15.9, 1.5 Hz, 1H), 5.58 (dq,  $J$  = 16.0, 6.3 Hz, 1H), 4.81 (d,  $J$  = 10.9 Hz, 1H), 4.78 (d,  $J$  = 10.9 Hz, 1H), 3.80 (s, 2H), 3.36 (s, 3H), 1.78 (dd,  $J$  = 6.4, 1.6 Hz, 3H); <sup>13</sup>C NMR (125 MHz, CDCl<sub>3</sub>):  $\delta$  = 162.2 (e), 148.6 (e, 2C), 141.2 (e), 134.0 (e), 132.3 (o), 129.3 (o, 2C), 128.4 (o, 2C), 127.3 (o, 2C), 127.1 (o), 127.0 (o), 122.2 (o), 76.3 (e), 69.1 (e), 59.4 (o), 48.8 (e), 18.5 (o); IR (neat):  $\tilde{\nu}$  = 3100 (w), 2918 (w), 1732 (s), 1629 (m), 1598 (w), 1542 (vs), 1496 (w), 1459 (m), 1448 (w), 1342 (vs), 1271 (vs), 1165 (s), 1106 (m), 1075 (m), 1030 (w), 974 (s), 911 (s), 830 (w), 766 (m), 728 (vs), 719 (vs), 699 (vs) cm<sup>-1</sup>; HRMS (ESI) calcd for (C<sub>20</sub>H<sub>20</sub>N<sub>2</sub>O<sub>7</sub> + Na): 423.1168; found: 423.1161;  $[\alpha]_D^{20} = -13^\circ$  ( $c$  = 1, CHCl<sub>3</sub>).

### Calculation of enantiomeric excess of (*S,S*)-**21** and determination of its absolute configuration

Considering the isolated yield and the enantiomeric purity of (**R**)-**19** and (**S**)-**20**, we deduced that (**R**)-**18** was completely consumed. The enantiomeric ratio for (*S,S*)-**21** was then calculated using the crude ratio (**S**)-**18**/**(R)**-**19**/**(S)**-**20**/**(S,S)**-**21** = 0.07:1:0.62:0.2 and Horeau's equation:

$$e.e._{18} \times y_{18} + e.e._{19} \times y_{19} + e.e._{20} \times y_{20} + e.e._{21} \times y_{21} = 0$$

With  $y$  is the molar fraction of **18–21** and the e.e. of (**R**)-**19** being arbitrarily assumed to be positive (e.e. = enantiomeric excess), we found  $e.e._{21} = -92\%$ .

### Kinetic resolution of **16**

Kinetic resolution, as performed for ( $\pm$ )-**18**, was also conducted on **16** (0.0933 mmol, 20 mg) to afford (+)-**16** (8 mg, 40%,  $[\alpha]_D^{20} = +15.5^\circ$  ( $c = 0.5$ ,  $\text{CHCl}_3$ )) and (-)-**17** (10 mg, 50%,  $[\alpha]_D^{20} = -91^\circ$  ( $c = 1$ ,  $\text{CHCl}_3$ )). Chiral HPLC analysis (25 cm x 4.6 mm Chiralpak AD-H column), 2% isopropanol-hexane at 1 mL/min. flow rate, 230 nm;  $t_R$  (*minor*) 9.3 min.,  $t_R$  (*major*) 11.9 min., 2:98 enantiomeric ratio. The e.r. of (+)-**16** could not be measured directly but was determined on alcohol **SI-3**, obtained after  $\text{LiAlH}_4$ -reduction: chiral HPLC analysis (25 cm x 4.6 mm Chiralpak AD-H column), 6% isopropanol-hexane at 1 mL/min. flow rate, 230 nm;  $t_R$  (*minor*) 8.95 min.,  $t_R$  (*major*) 11.5 min., 1:99 enantiomeric ratio. The absolute configuration of (+)-**16** and (-)-**17** was not determined.

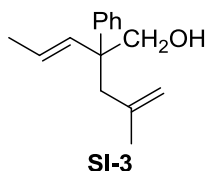

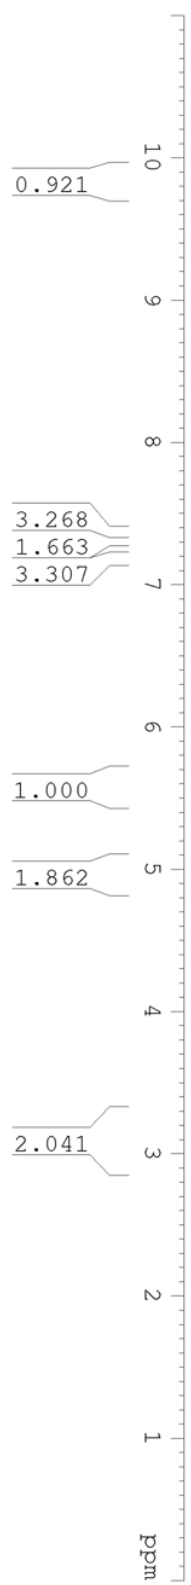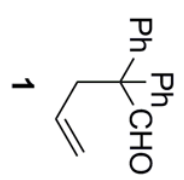

Output Data Parameters  
 EXPNO: 1  
 F2 - Acquisition Parameters  
 Date\_ : 20100828  
 Time: 10:00:00  
 Instrument: spect  
 Processor: waltz16  
 Acquisition Date: 20100828  
 Acquisition Time: 10:00:00  
 Solvent: CDCl3  
 NS: 1024  
 DS: 4  
 SWH: 10240.0 Hz  
 FIDRES: 0.116241 Hz  
 AQ: 0.462000 sec  
 RG: 512  
 SF: 500.137170 MHz  
 SFO: 500.137170 MHz  
 PC: 0  
 QRES: 0.30 Hz  
 PR: 1.00

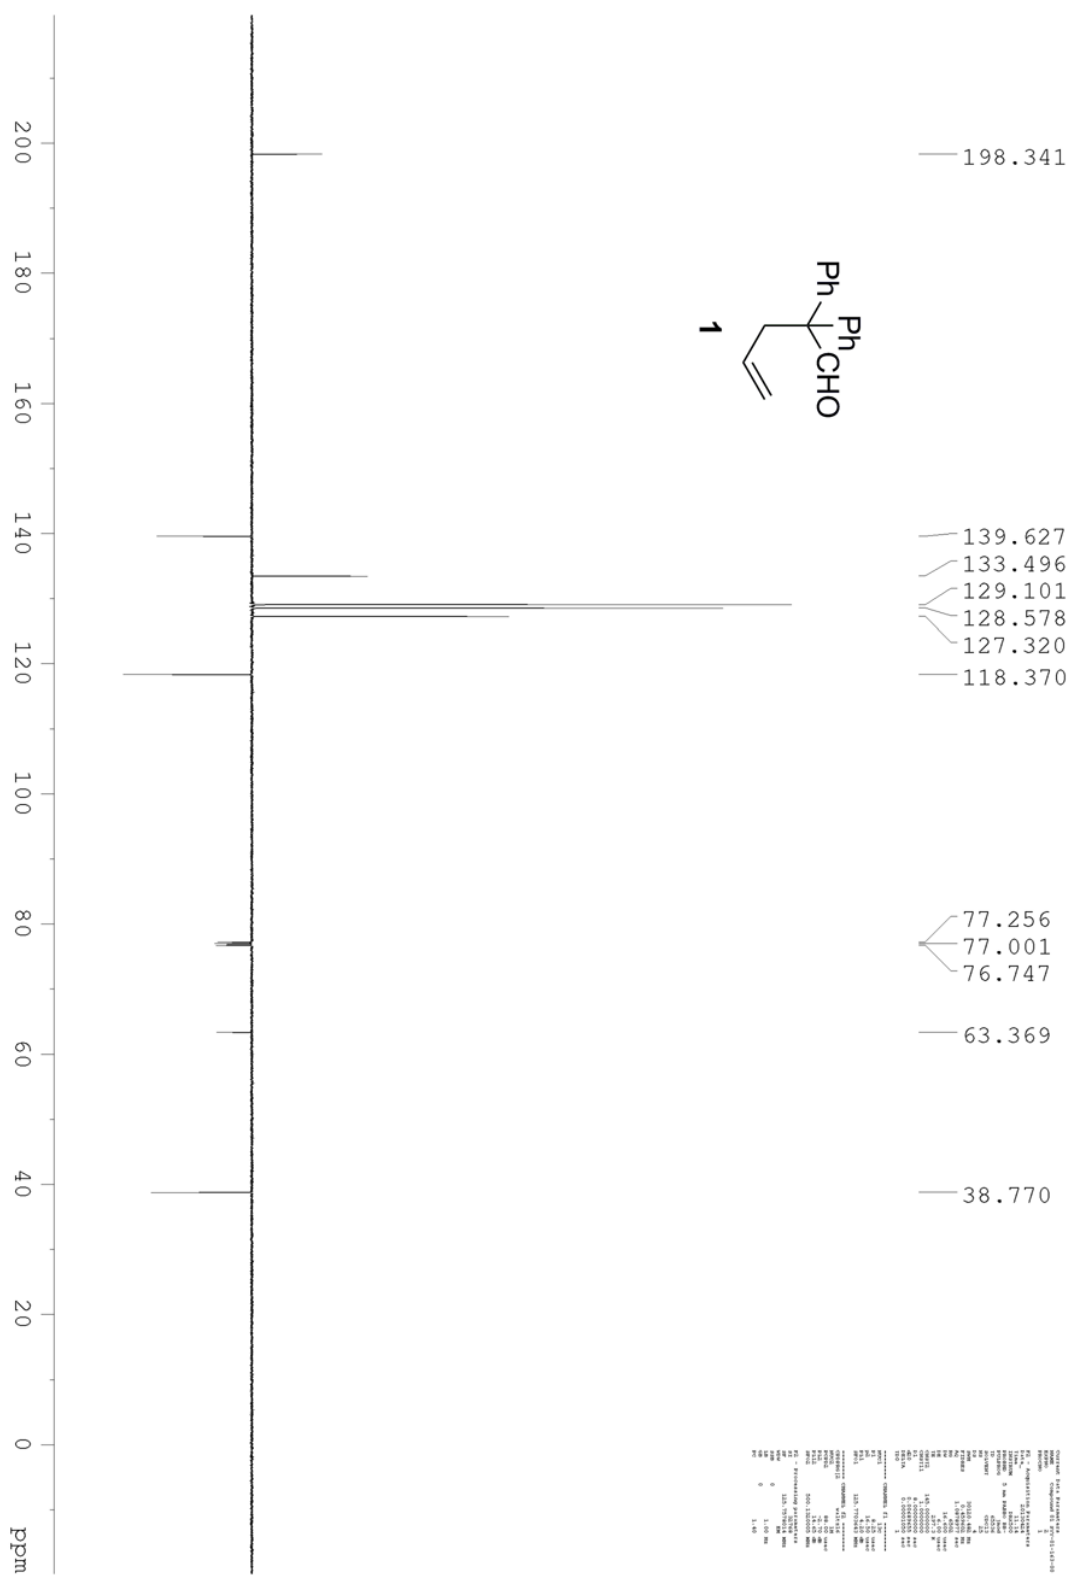

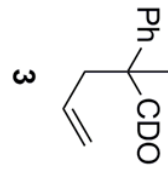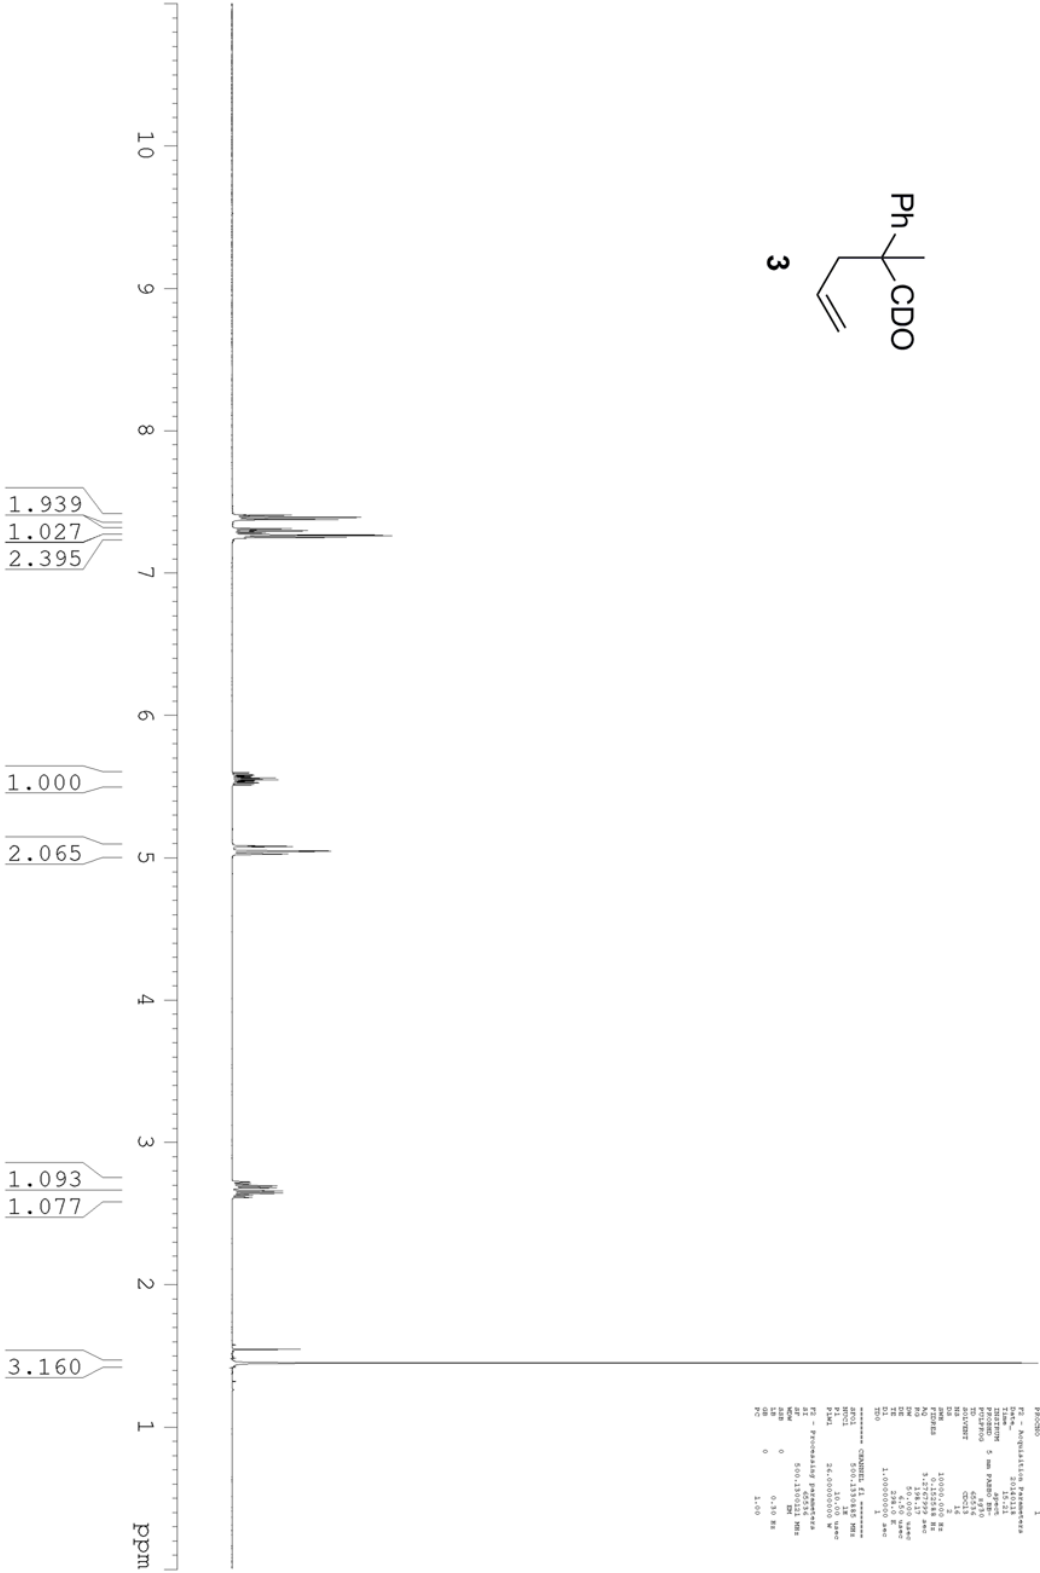

Current Data Parameters  
 Name: Compound 03 100-000-014  
 Date: 10/11/2011  
 Time: 13:21  
 Instrument: spect  
 Processor: 5 mm PABBO 400  
 Reference: DMSO-d6  
 Dilution: 0.50000000  
 Integration: 1.00000000  
 Scale: 1.00000000 Hz  
 F2 - Acquisition Parameters  
 Name: 100-000-014  
 Date: 10/11/2011  
 Time: 13:21  
 Instrument: spect  
 Processor: 5 mm PABBO 400  
 Reference: DMSO-d6  
 Dilution: 0.50000000  
 Integration: 1.00000000  
 Scale: 1.00000000 Hz  
 F1 - Processing Parameters  
 Name: 100-000-014  
 Date: 10/11/2011  
 Time: 13:21  
 Instrument: spect  
 Processor: 5 mm PABBO 400  
 Reference: DMSO-d6  
 Dilution: 0.50000000  
 Integration: 1.00000000  
 Scale: 1.00000000 Hz



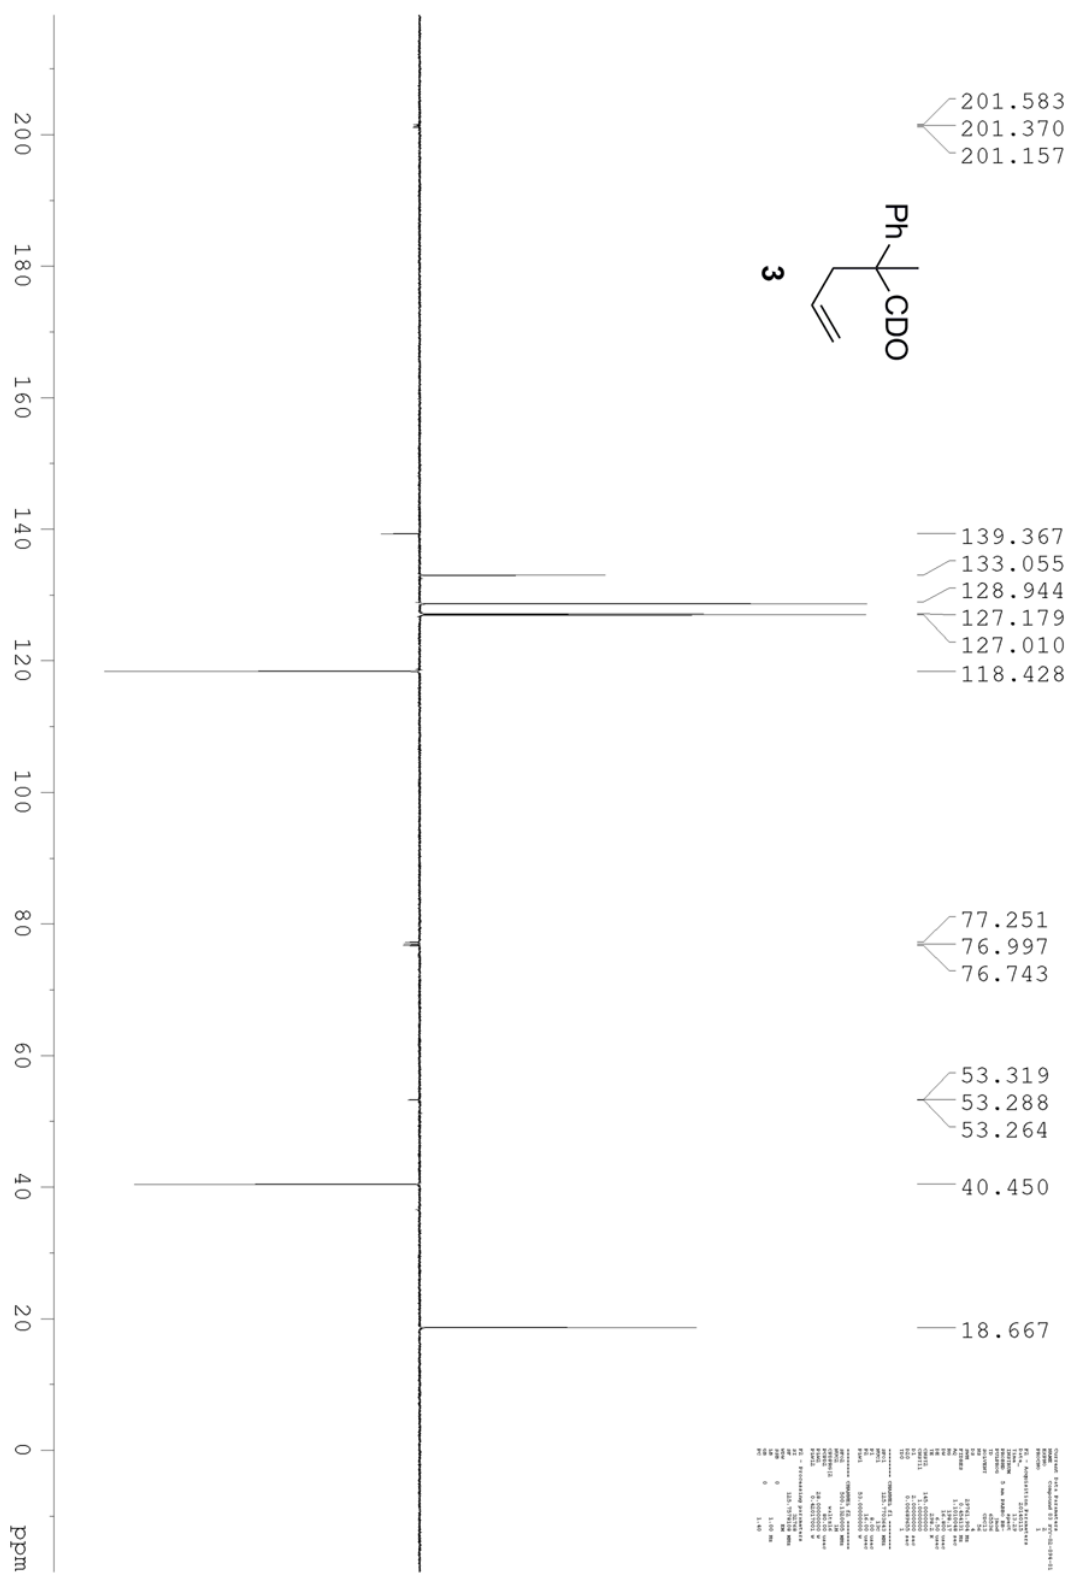

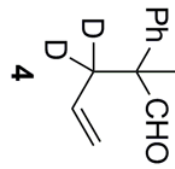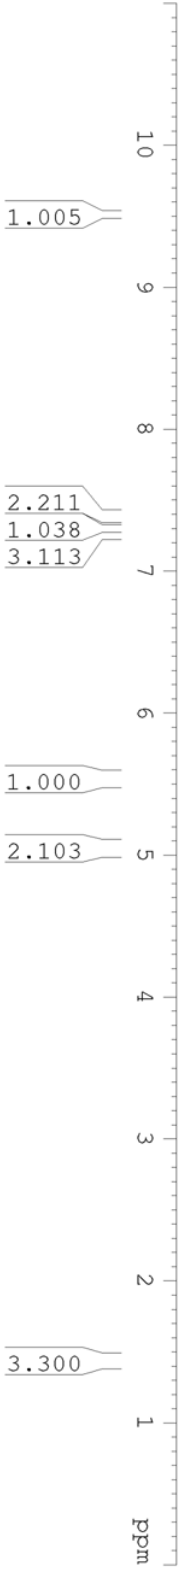

```

===== CHANNEL f1 =====
F1 - Acquisition Parameters
Date_   20120801
Time    9:42
PROBHD  5 mm PABBO 5B-
PULPROG zgpg30
AQ      5.00000000
RG      655.3571
SI      32768
SF      500.136260 MHz
WDW     EM
SSB     0
GB      0
PC      1.00000000
----- CHANNEL f2 -----
F2 - Processing parameters
SI      32768
SF      500.136260 MHz
WDW     EM
SSB     0
GB      0
PC      1.00000000
=====
SI      32768
SF      500.136260 MHz
WDW     EM
SSB     0
GB      0
PC      1.00000000

```

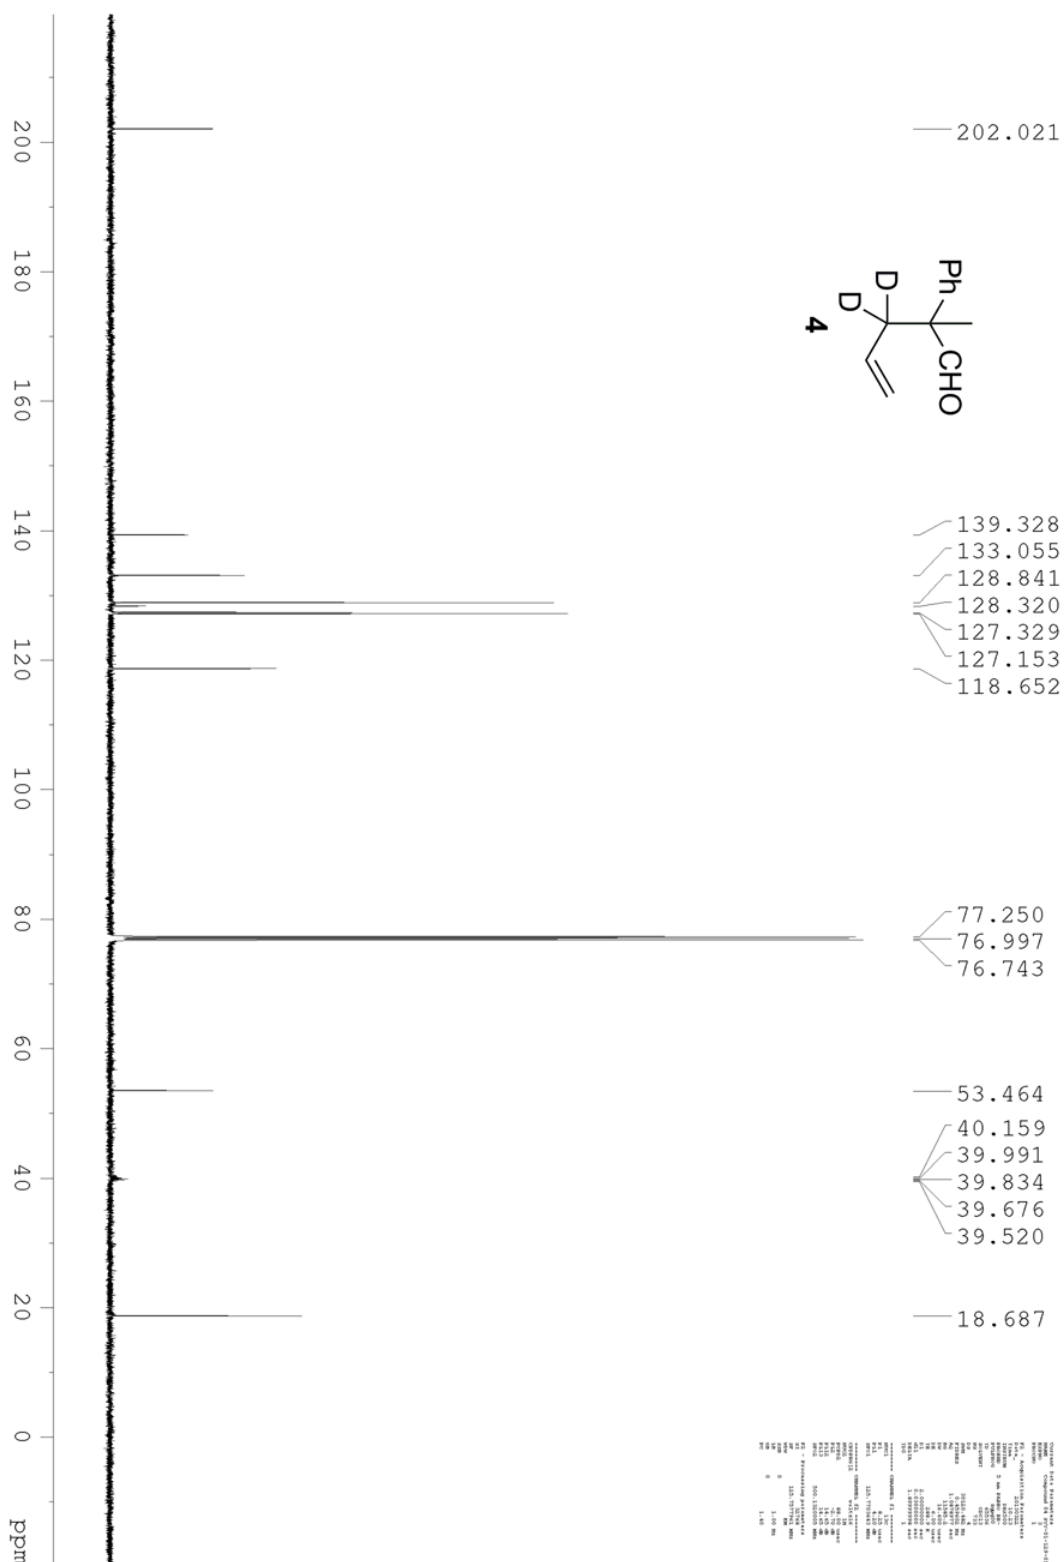

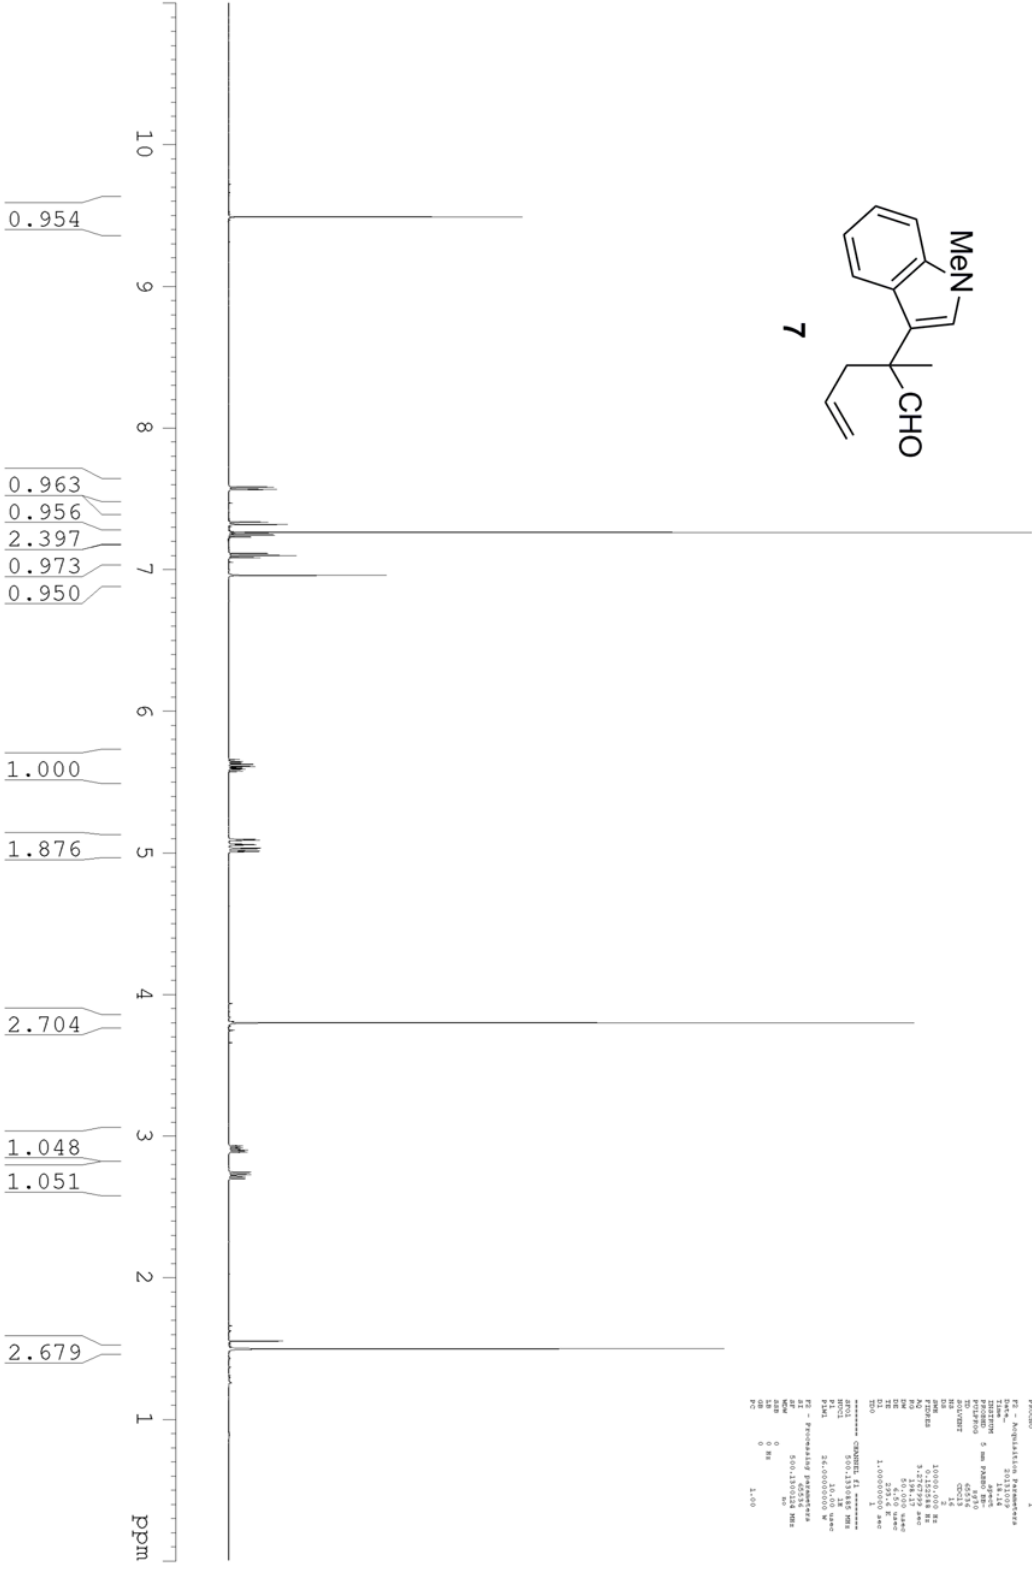

```

NAME: 7-2013-01-01
EXPNO: 1
PROCNO: 1
F2 - Acquisition Parameters
Date_ 2013.01.01
Time 11.52
PROBHD 5 mm BBO-1H NMR
PULPROG zgpg30
AQ 0.0314
RG 327.5
AQ 0.0314
SFO 500.135444
NUC1 13
NUC2 13
PC 1.00
===== CHANNEL f1 =====
NUC1 13
P1 12.00
PL1 0.00
PC 1.00
===== CHANNEL f2 =====
NUC1 13
P1 12.00
PL1 0.00
PC 1.00
F2 - Processing parameters
SI 32768
SF 500.135444 MHz
AQ 0.0314 sec
RG 327.5
WDW EM
SSB 0
GB 0
PC 1.00
  
```



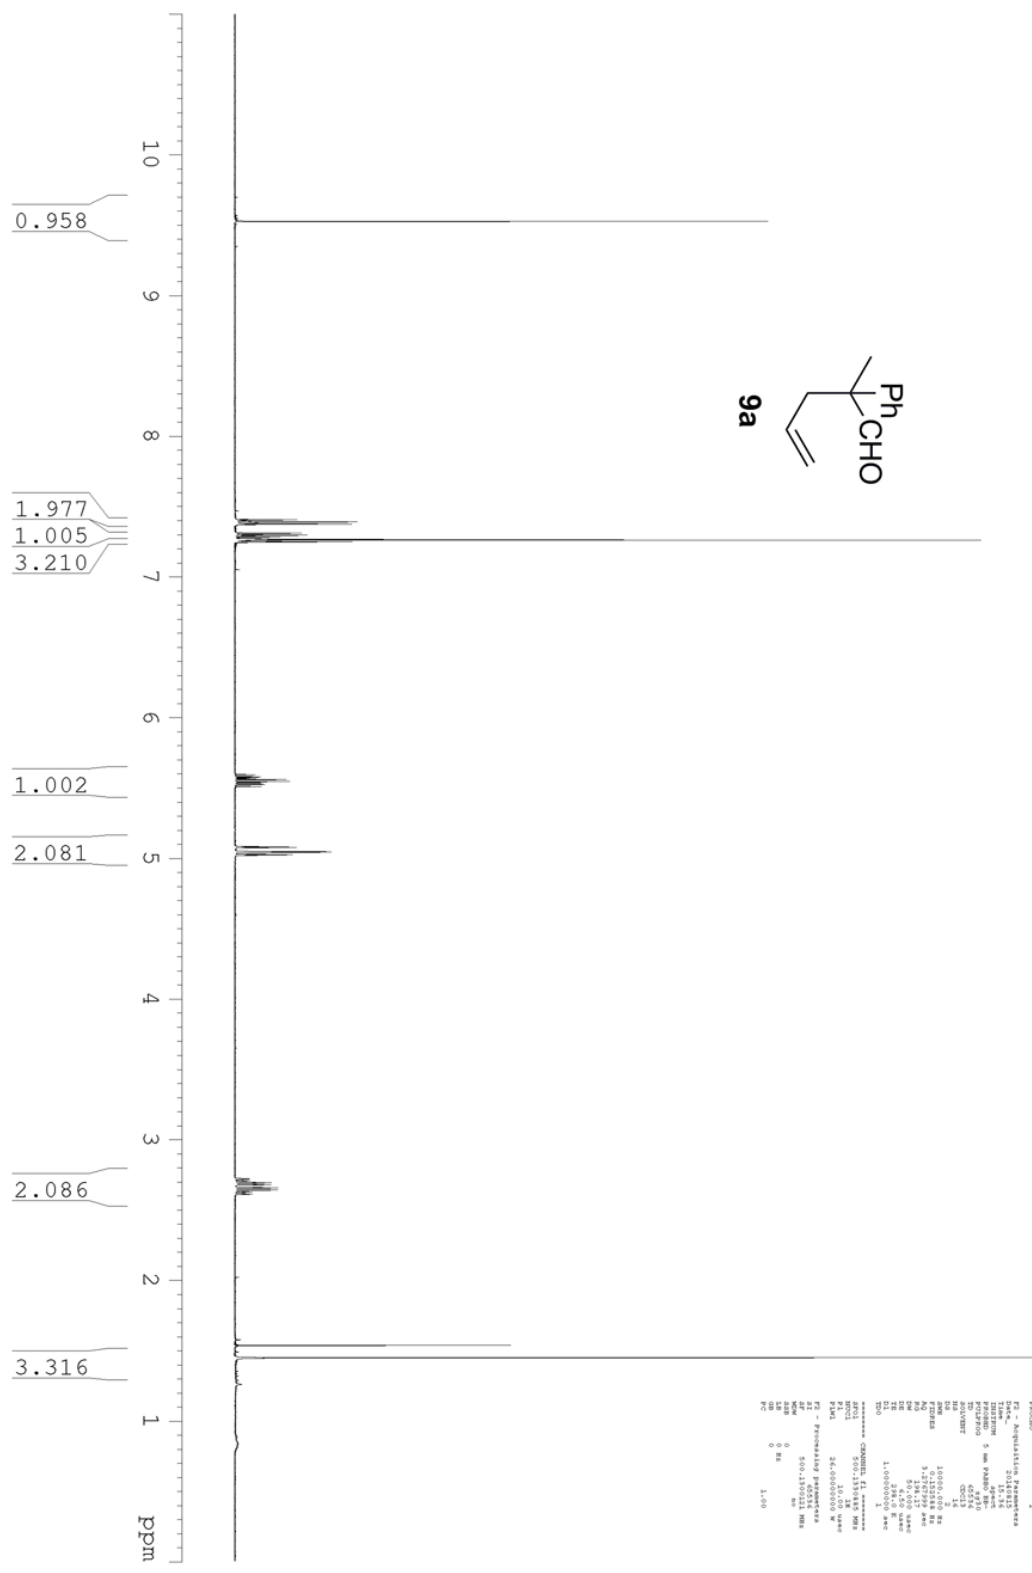



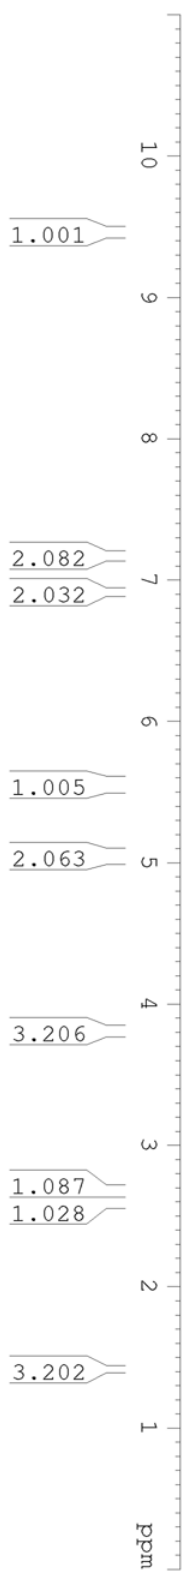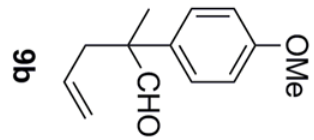

===== CHANNEL F1 =====  
 Name: 9b  
 P1: 4.00 MHz  
 P2: 4.00 MHz  
 F1 - Proximaly Parameters  
 F2 - Distally Parameters  
 APO: 500.131045 MHz  
 N1: 200.065523 MHz  
 N2: 200.065523 MHz  
 N3: 200.065523 MHz  
 N4: 200.065523 MHz  
 N5: 200.065523 MHz  
 N6: 200.065523 MHz  
 N7: 200.065523 MHz  
 N8: 200.065523 MHz  
 N9: 200.065523 MHz  
 N10: 200.065523 MHz  
 ===== CHANNEL F2 =====  
 Name: 9b  
 P1: 4.00 MHz  
 P2: 4.00 MHz  
 F1 - Proximaly Parameters  
 F2 - Distally Parameters  
 APO: 500.131045 MHz  
 N1: 200.065523 MHz  
 N2: 200.065523 MHz  
 N3: 200.065523 MHz  
 N4: 200.065523 MHz  
 N5: 200.065523 MHz  
 N6: 200.065523 MHz  
 N7: 200.065523 MHz  
 N8: 200.065523 MHz  
 N9: 200.065523 MHz  
 N10: 200.065523 MHz





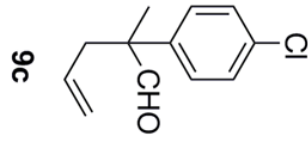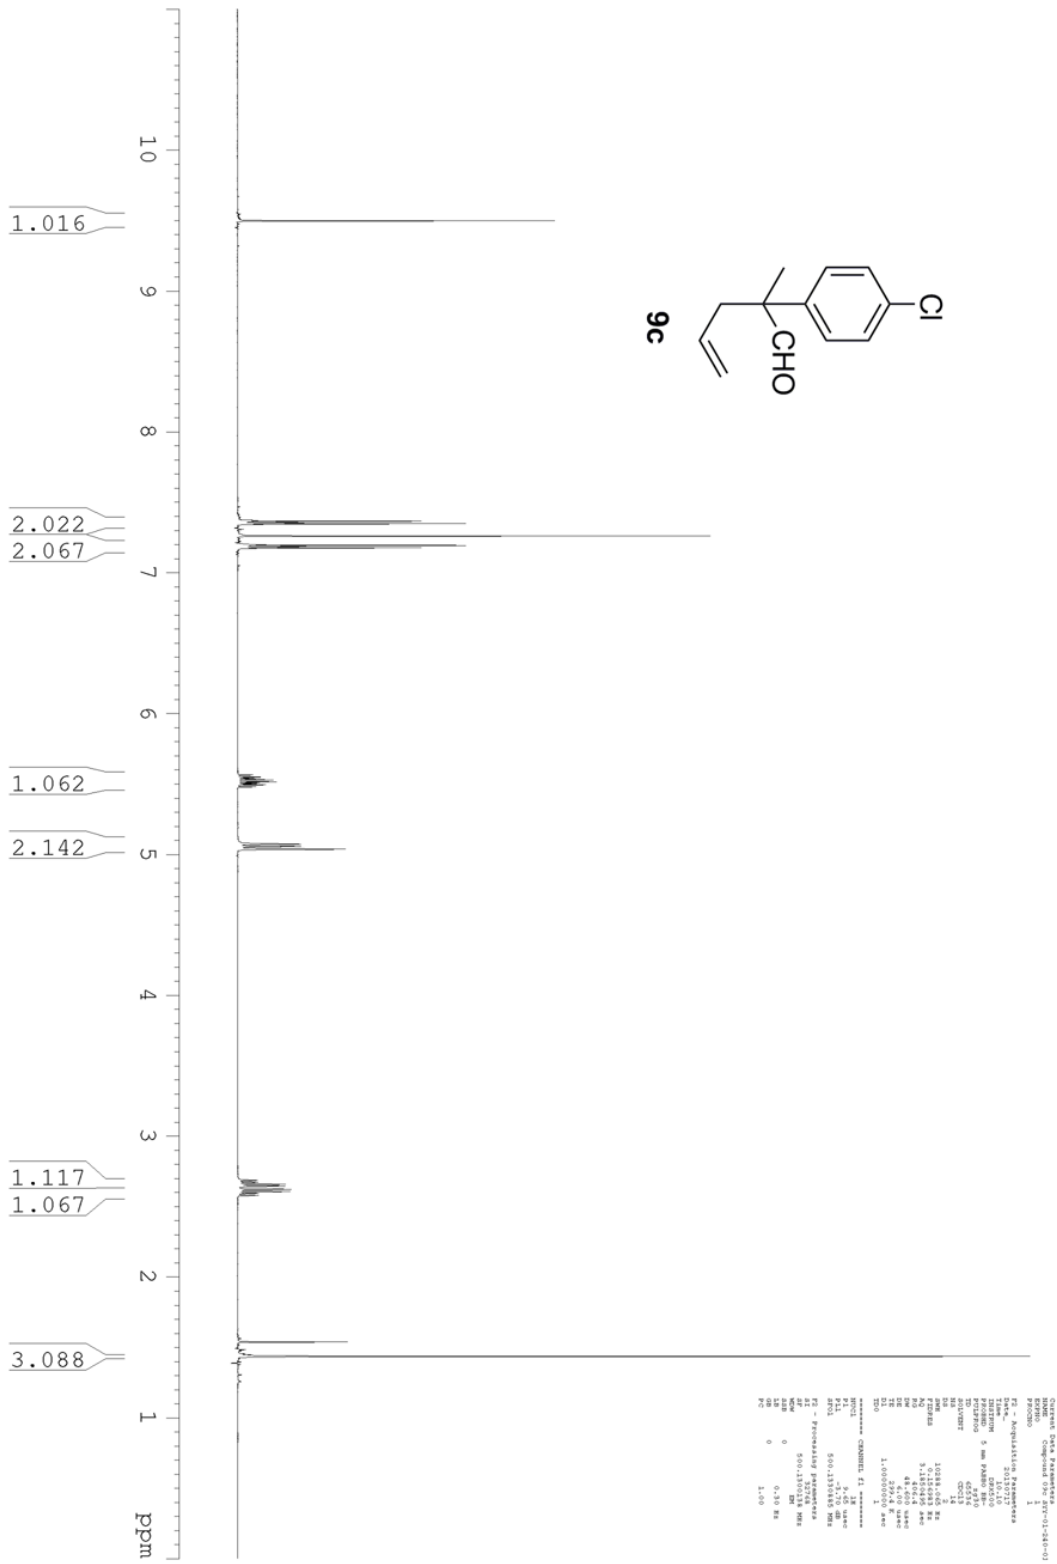

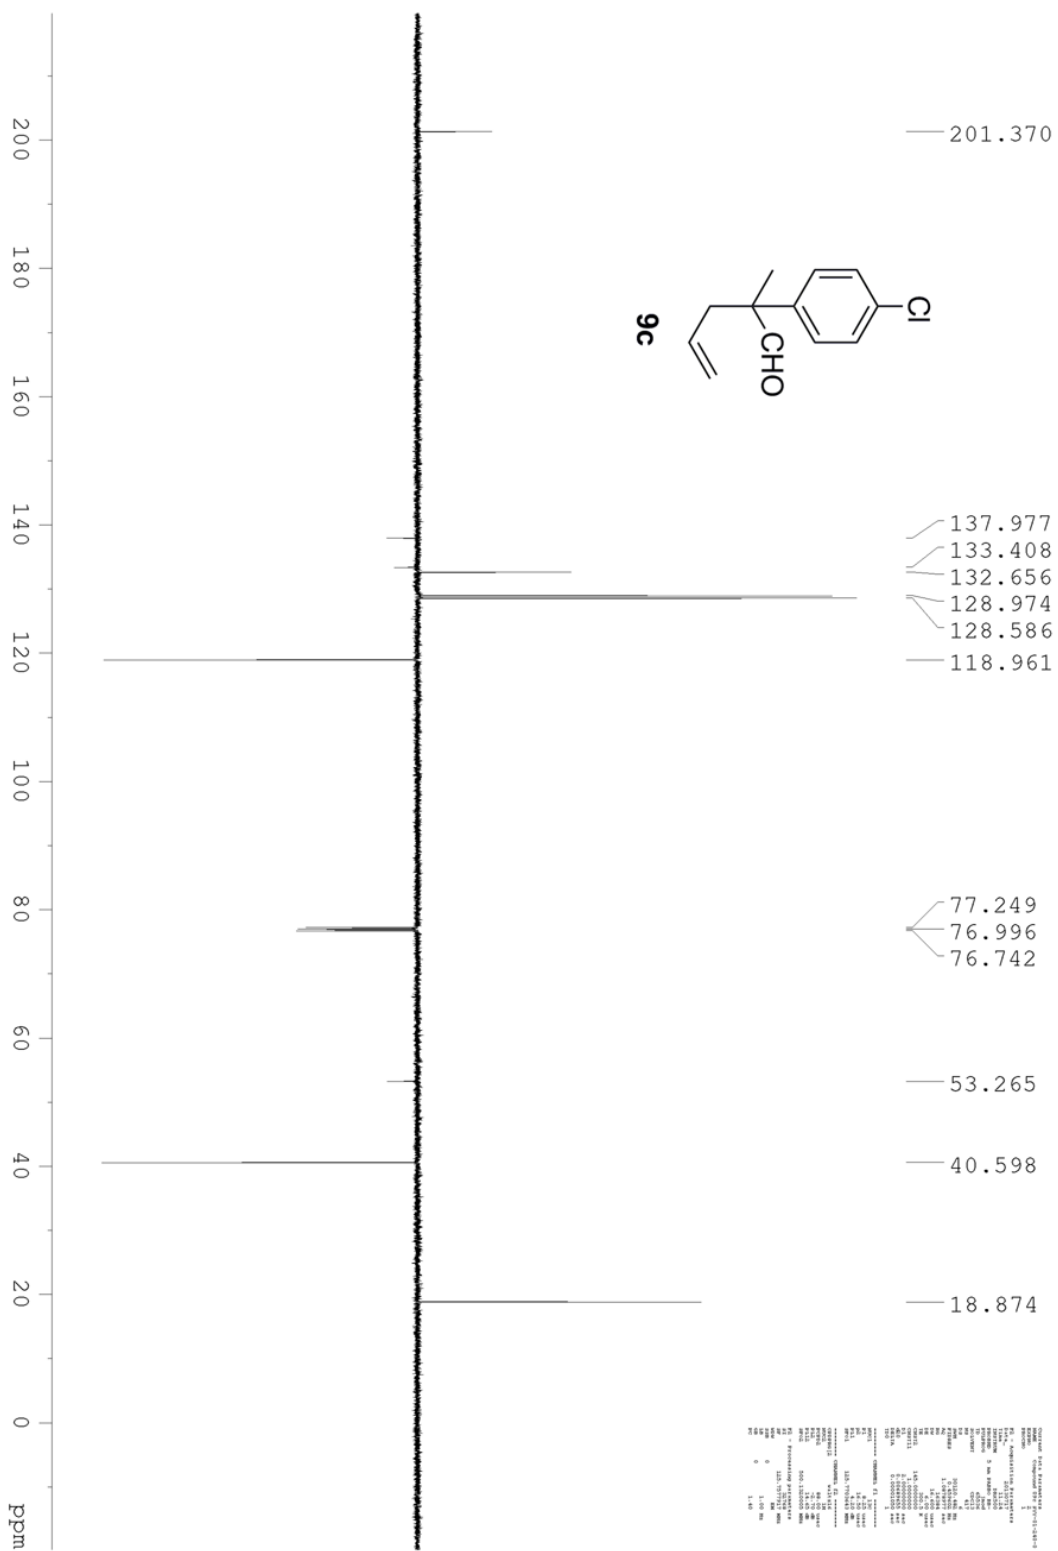

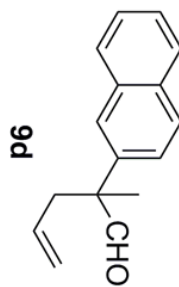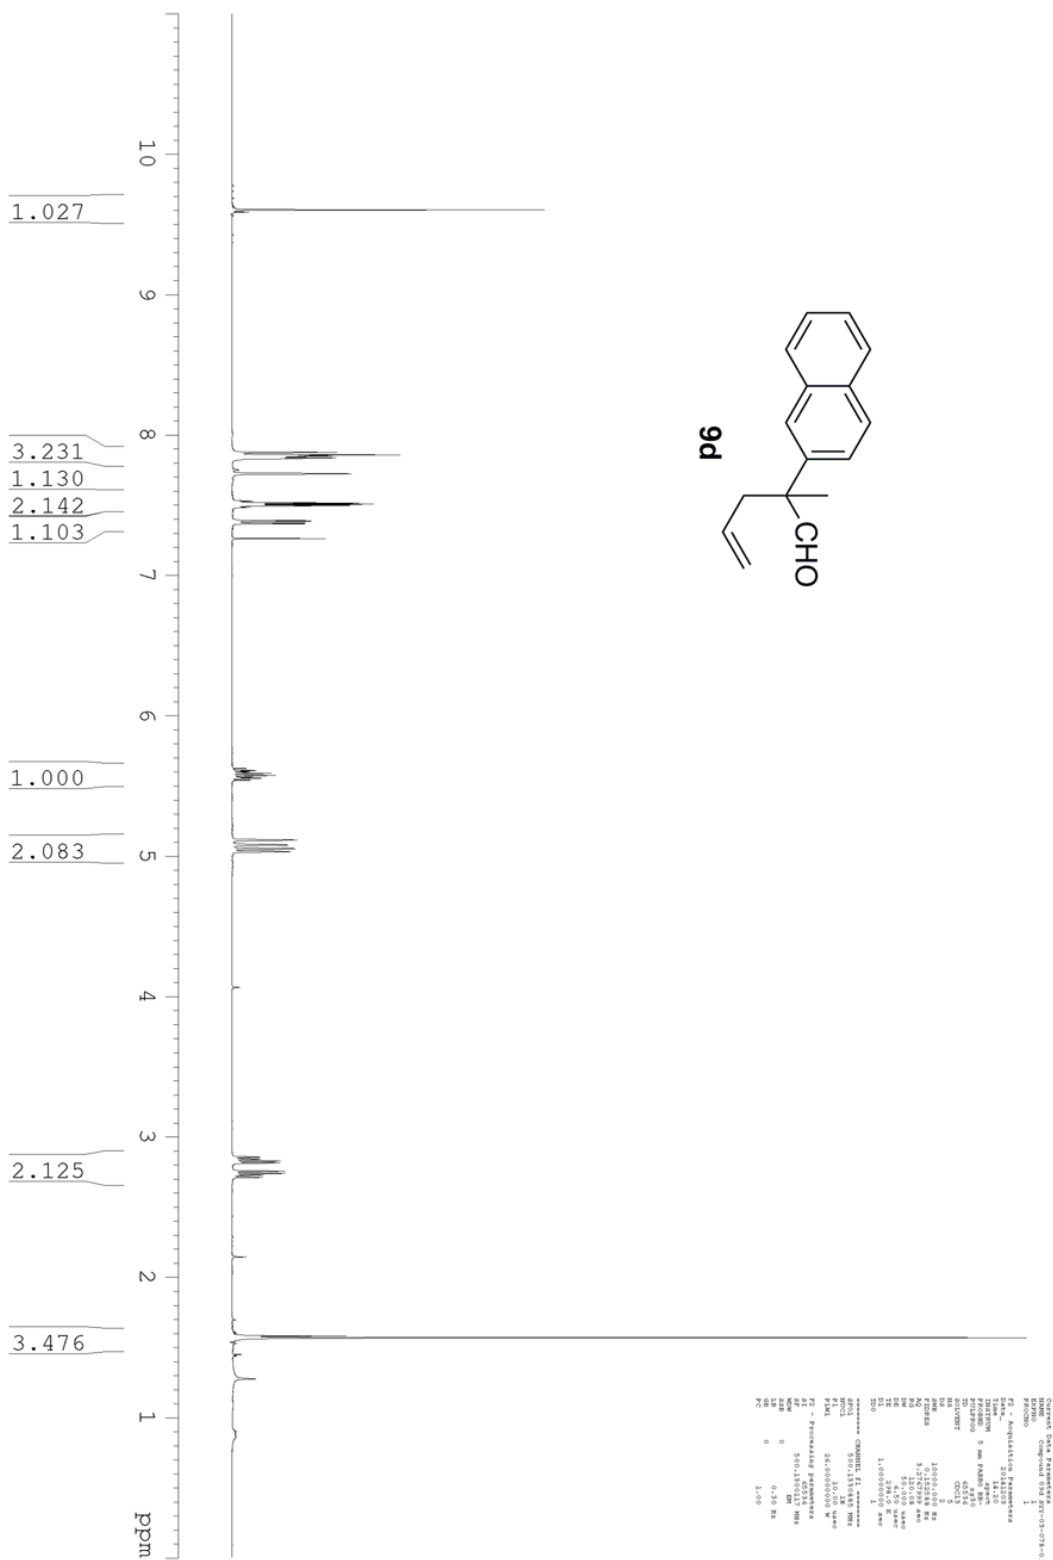



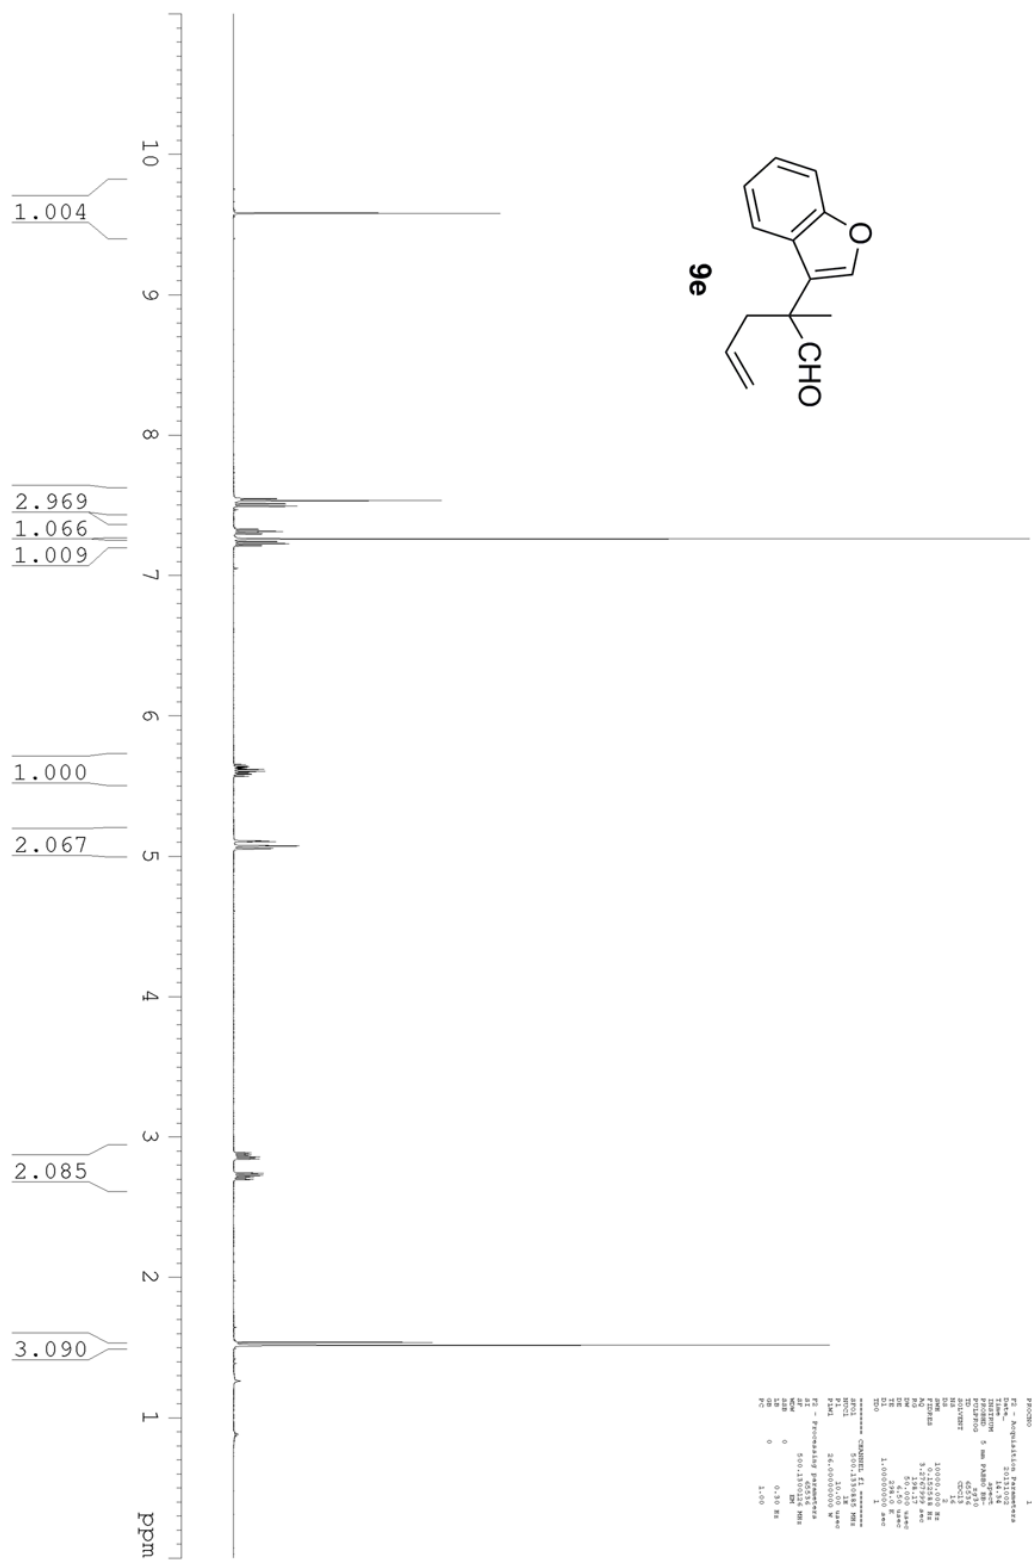

Current Data Parameters  
 Name: Compound 9e  
 Formula: C<sub>11</sub>H<sub>12</sub>O  
 MW: 164.21  
 Acq: 2017-02-08 11:00:00  
 F2 - Processing parameters  
 SI: 500.130024 MHz  
 NUC1: 13C  
 P1: 12.00  
 PC: 0 1.00



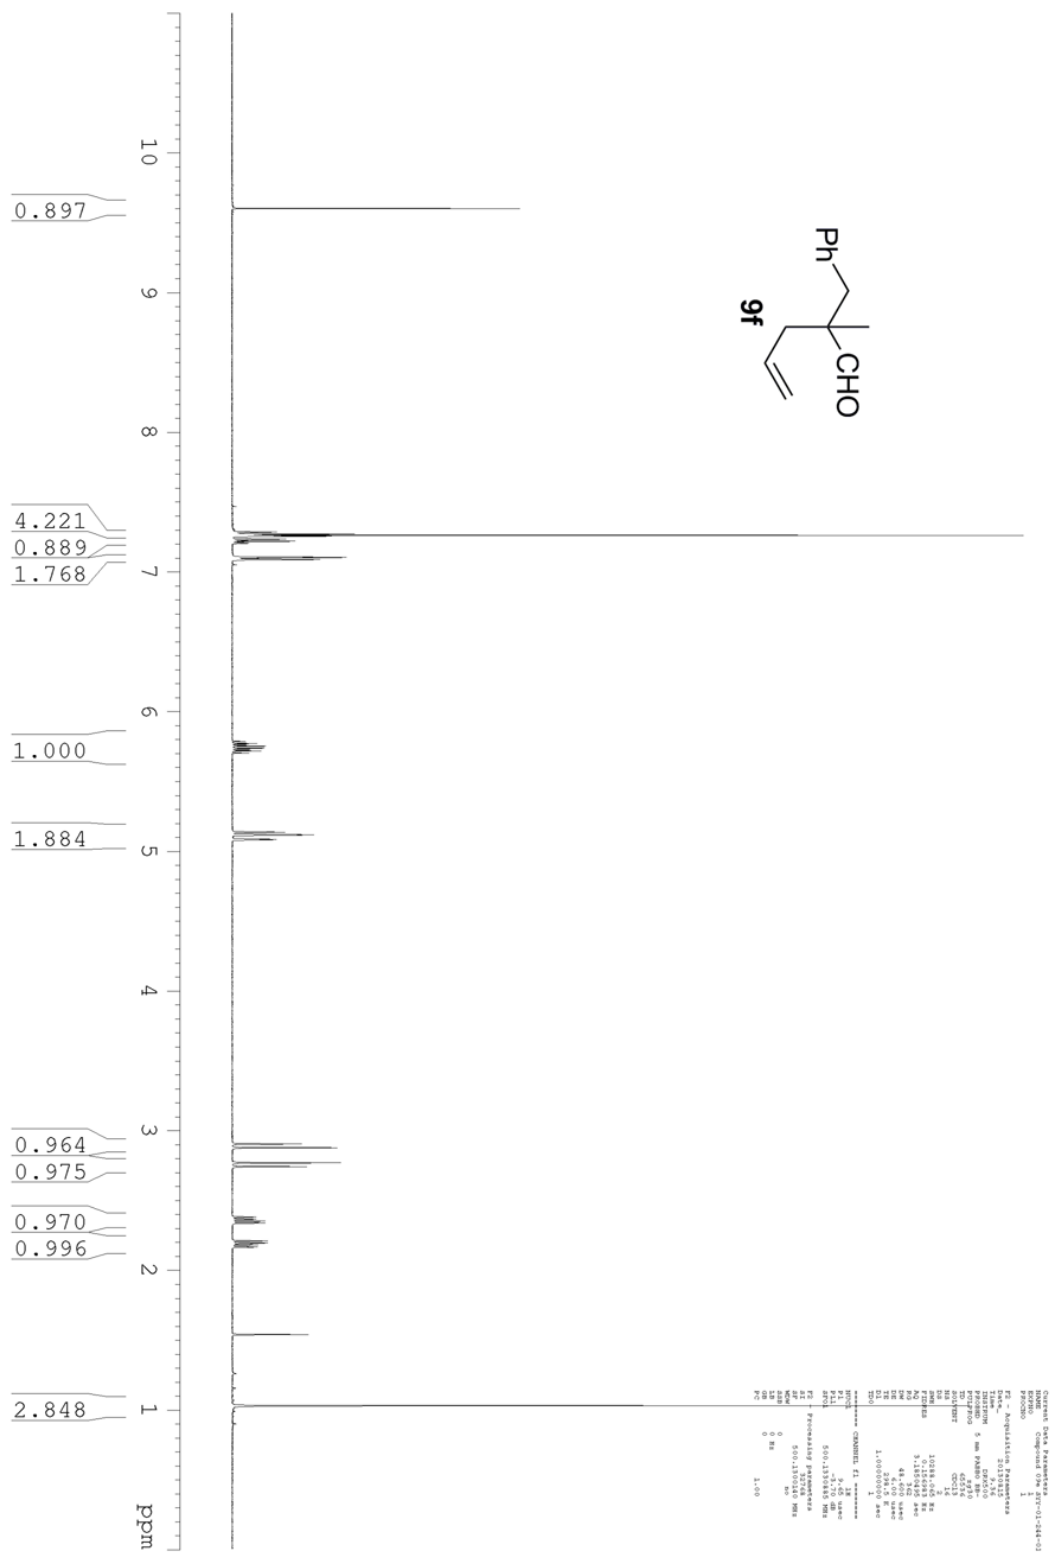



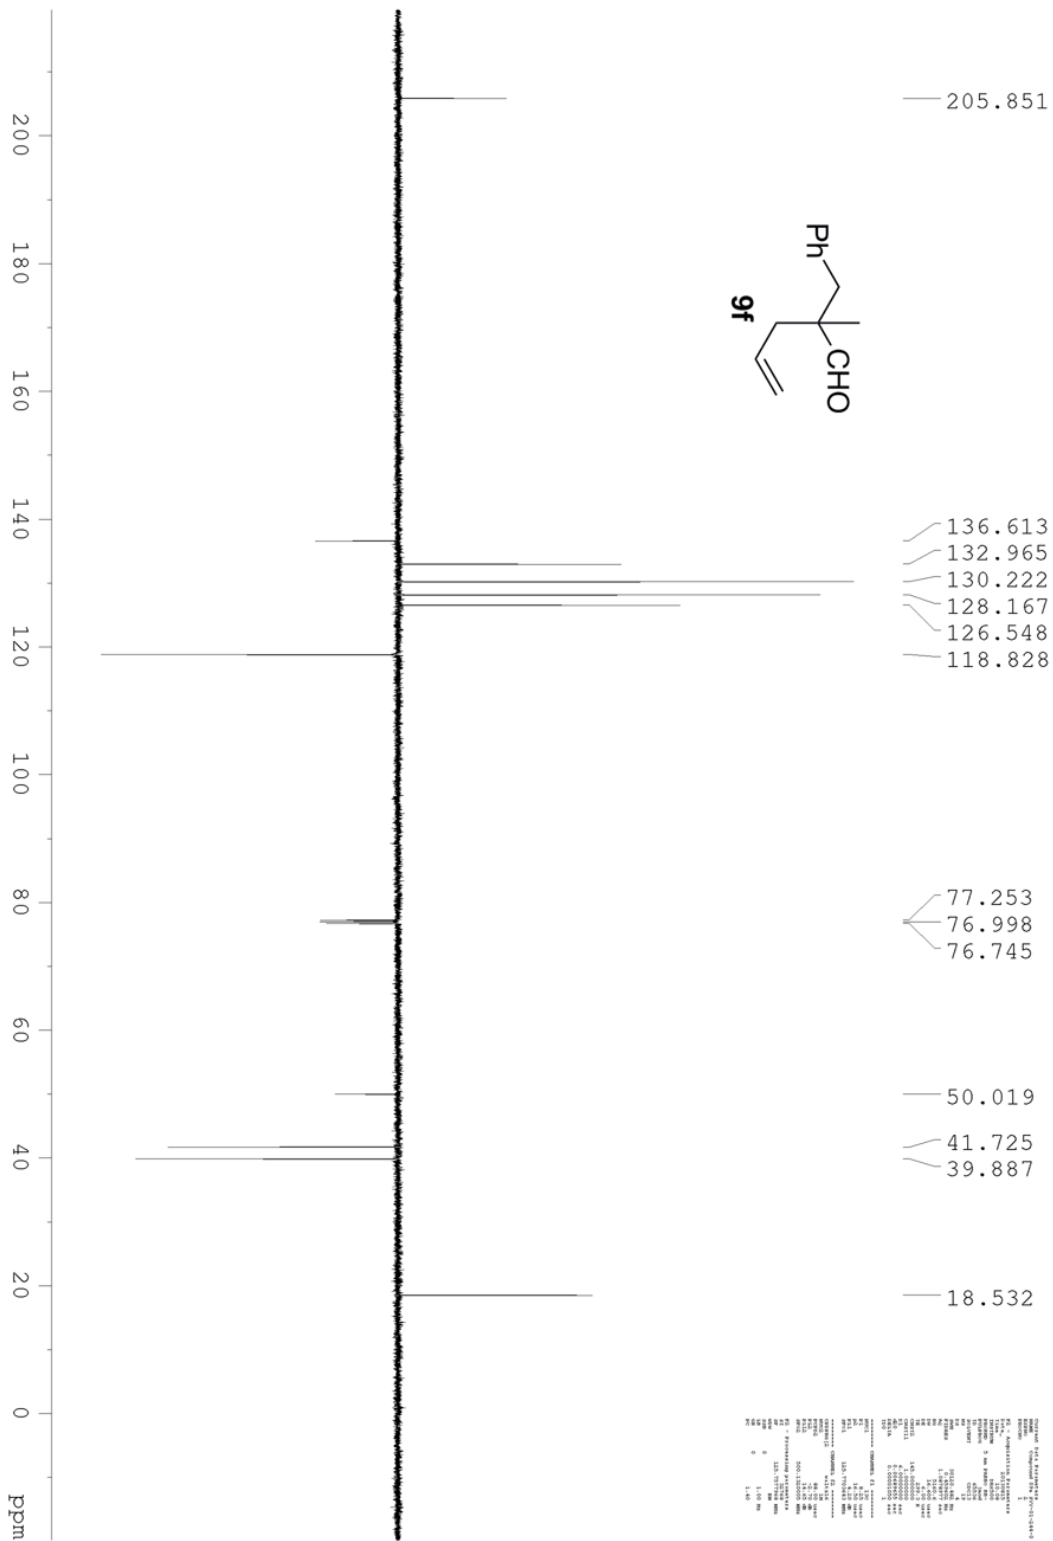



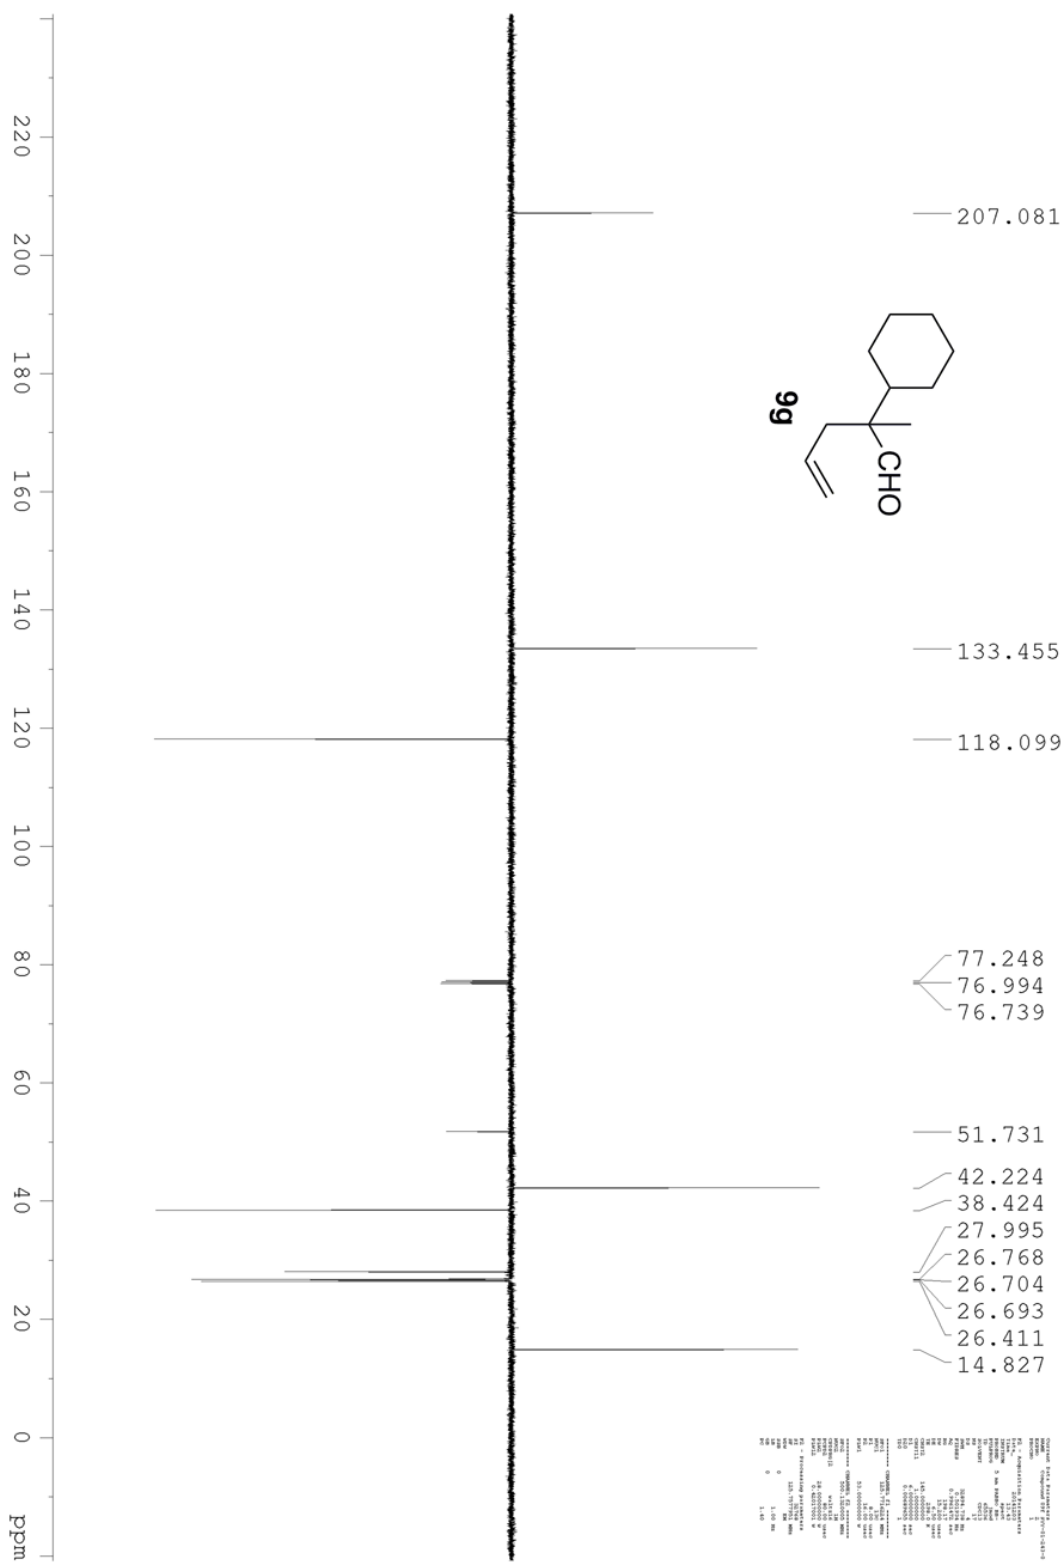

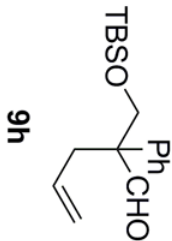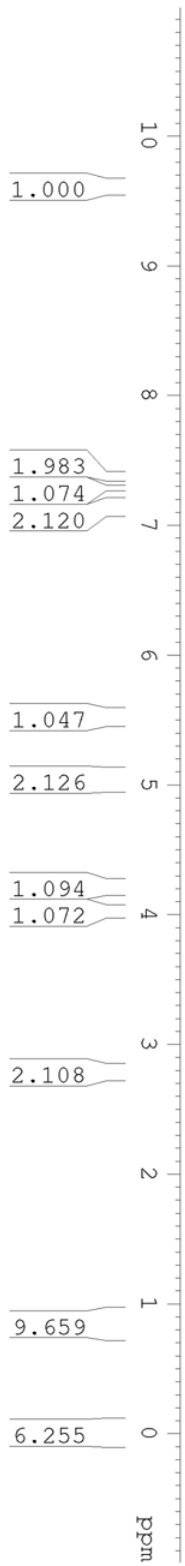

===== CHANNEL f1 =====  
 F2 - Acquisition Parameters  
 Date\_ 20181113  
 Time\_ 16.41.47  
 PROBR001 5 mm BBOv2 HPL  
 F2 - Processing Parameters  
 Acq\_ 1024.499885 MHz  
 P1\_ 1.000000000 W  
 F1 - Processing Parameters  
 Acq\_ 500.130328 MHz  
 P1\_ 0.500000000 W  
 SFO\_ 0 0.370 Hz  
 PE\_ 0 1.00

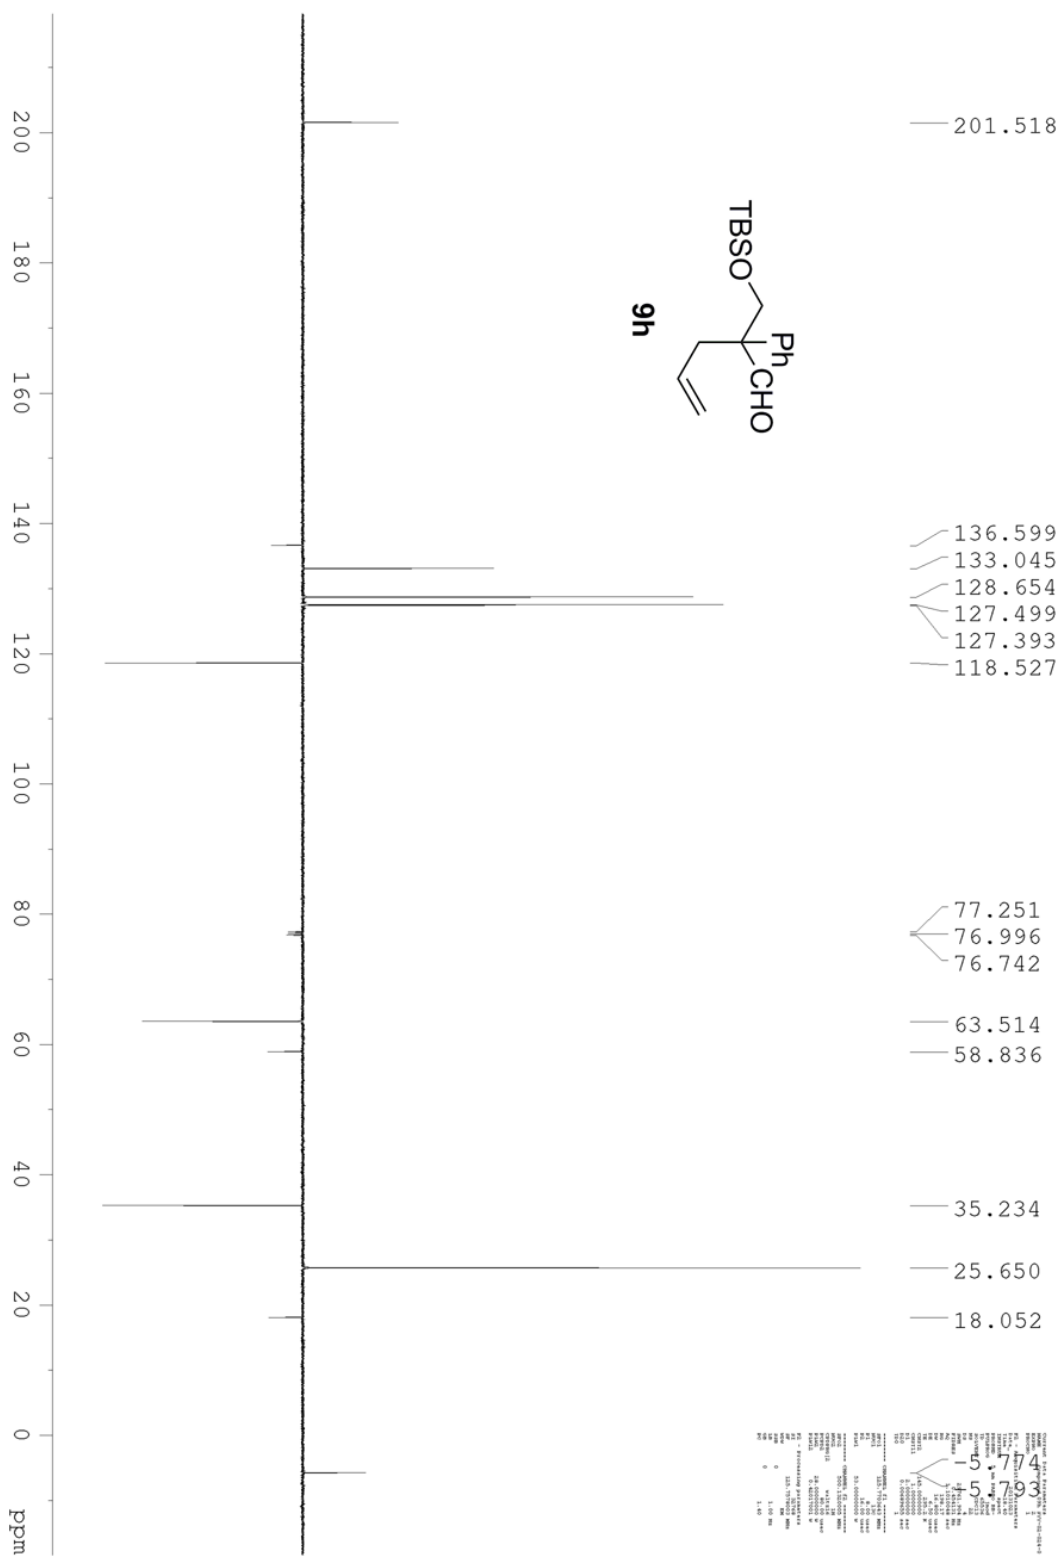

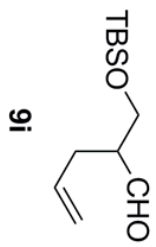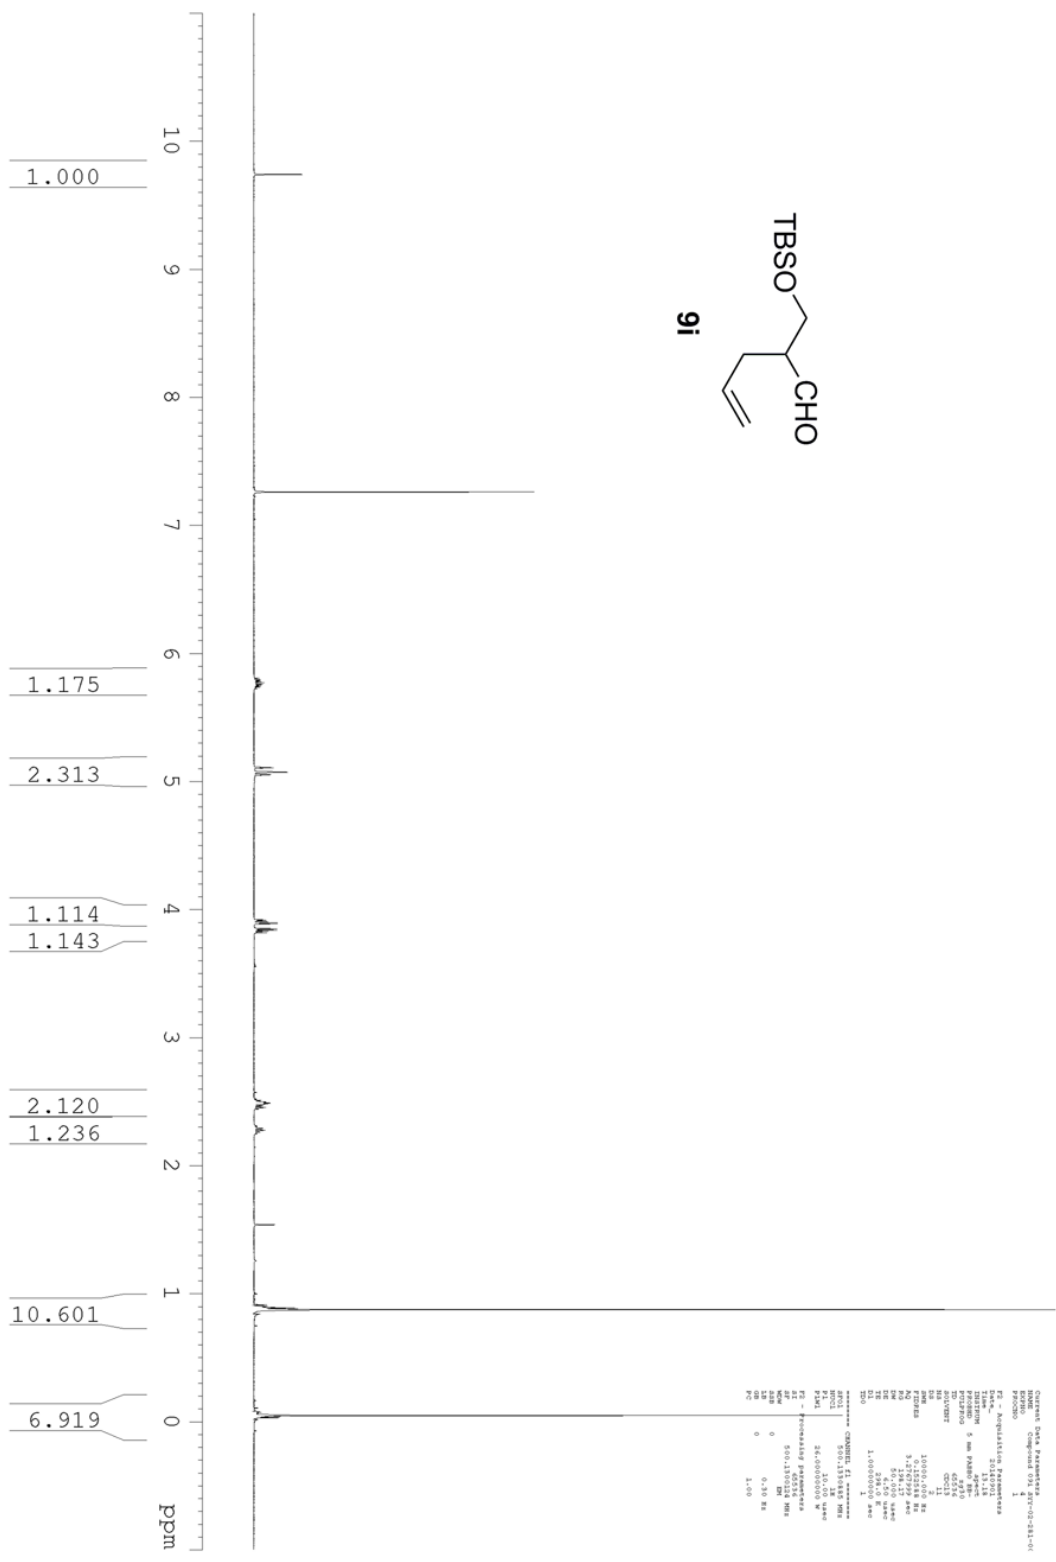

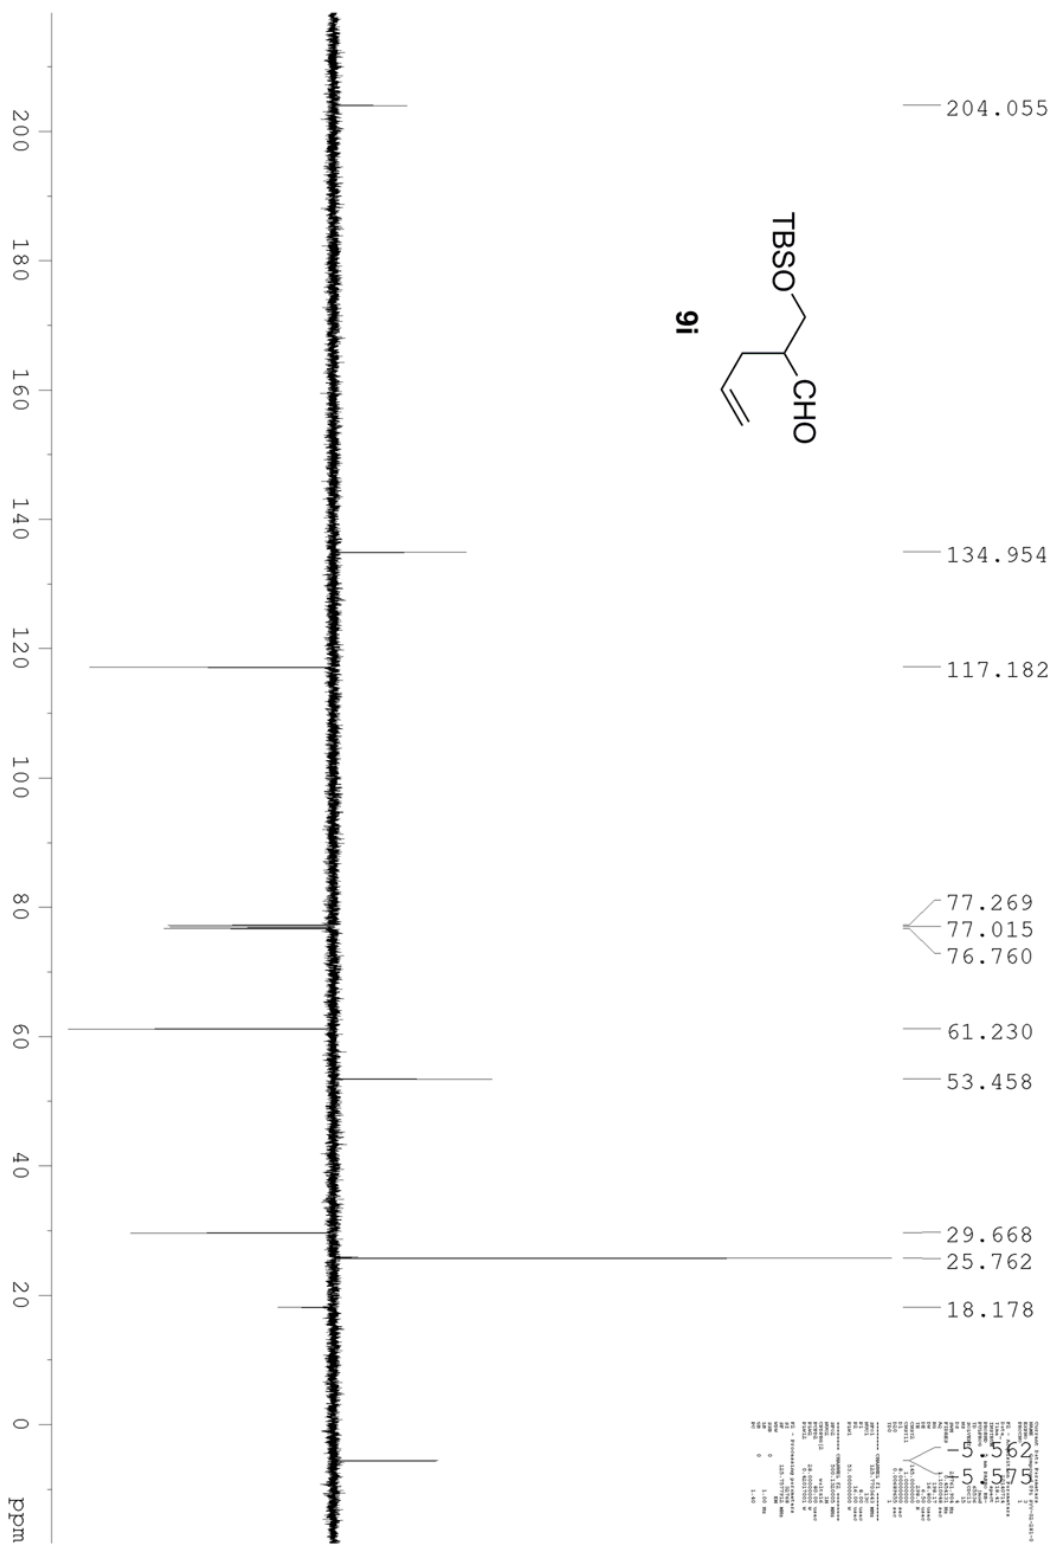

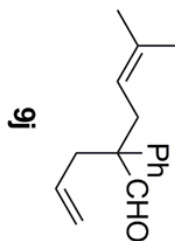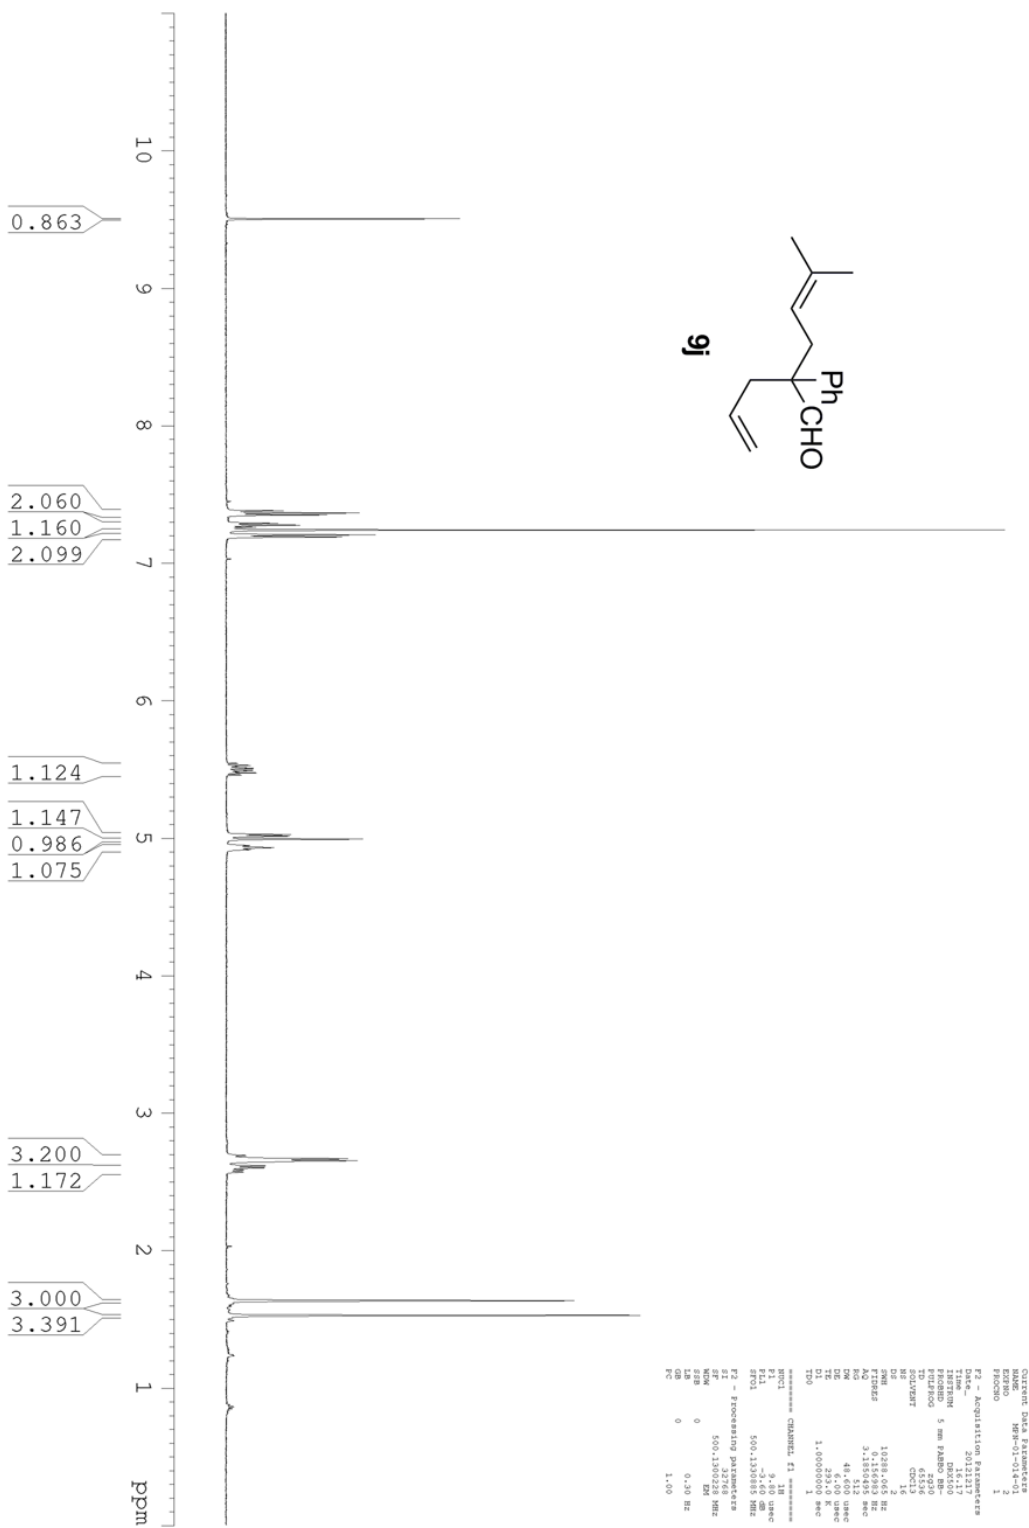





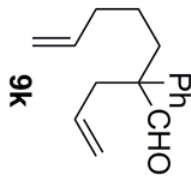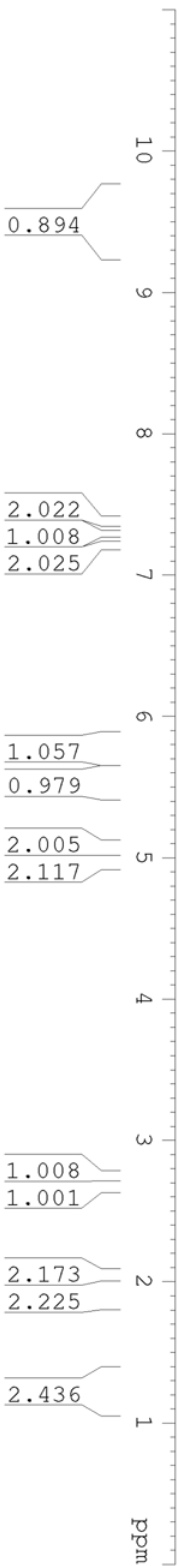

```

===== CHANNEL F1 =====
NAME:          9k_1
EXPNO:         1
PROCNO:        1
PROCRES:       1
P2:            1.0000000
P1:            1.0000000
SFO:           500.131728 MHz
AQ:            0.32000000
RG:            0
SI:            0
F2 - Acquisition Parameters
Date_  : 20191214
Time    : 17.43
INSTRUM : spect
PROBHDN : 5 mm HANBY 1H
PULPROG : zgpg30
DWDWPRG : genrf2
TD       : 65536
SFO      : 500.131728 MHz
AQ       : 0.32000000
RG       : 0
SI       : 0
F1 - Processing parameters
Date_    :
Time     :
INSTRUM  : spect
PROBHDN  : 5 mm HANBY 1H
PULPROG  : zgpg30
DWDWPRG  : genrf2
TD       : 65536
SFO      : 500.131728 MHz
AQ       : 0.32000000
RG       : 0
SI       : 0
===== CHANNEL F1 =====
NAME:          9k_1
EXPNO:         1
PROCNO:        1
PROCRES:       1
P2:            1.0000000
P1:            1.0000000
SFO:           500.131728 MHz
AQ:            0.32000000
RG:            0
SI:            0
===== CHANNEL F2 =====
NAME:          9k_1
EXPNO:         1
PROCNO:        1
PROCRES:       1
P2:            1.0000000
P1:            1.0000000
SFO:           500.131728 MHz
AQ:            0.32000000
RG:            0
SI:            0
===== CHANNEL F2 =====

```

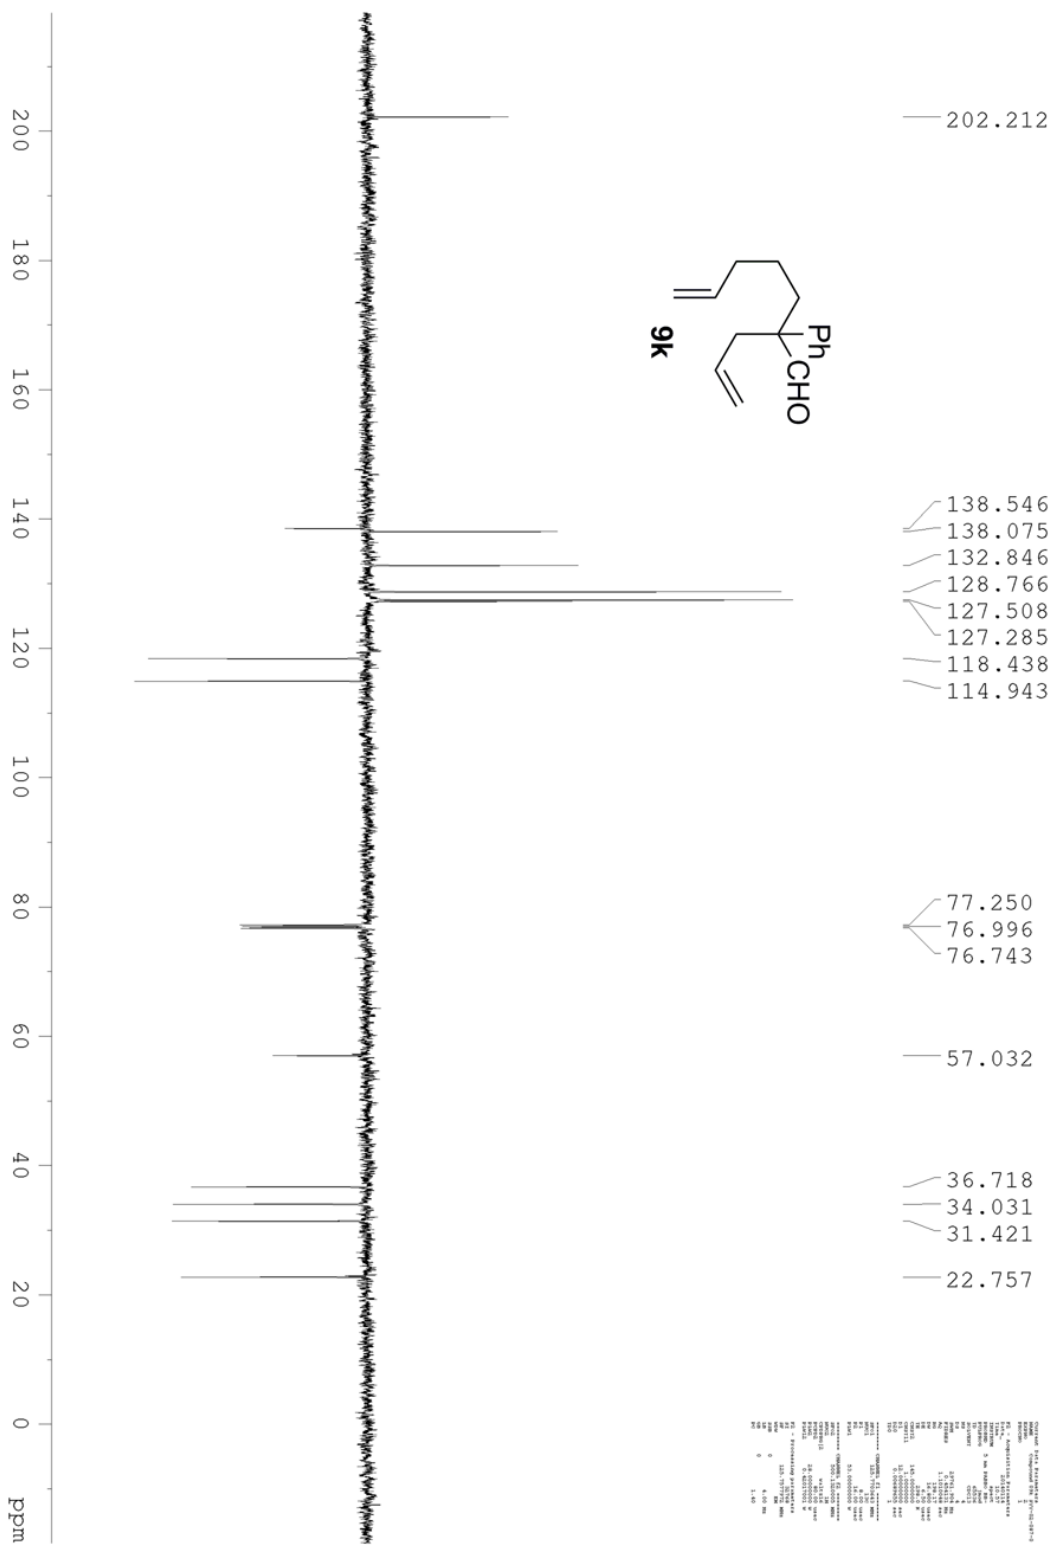

```

NAME          9k
EXPNO         1
PROCNO        1
PROCNAME      gpc131
F2           125.762 MHz
F1           500.136 MHz
AQ           0.39000000
RG            655
RGY           4
RGZ           4
AQ2          0.39000000
RG2           655
RG3           4
RG4           4
SFO          200
SI             655
SF            125.762 MHz
SF2           500.136 MHz
SF3           500.136 MHz
SF4           500.136 MHz
SF5           500.136 MHz
SF6           500.136 MHz
SF7           500.136 MHz
SF8           500.136 MHz
SF9           500.136 MHz
SF10          500.136 MHz
SF11          500.136 MHz
SF12          500.136 MHz
SF13          500.136 MHz
SF14          500.136 MHz
SF15          500.136 MHz
SF16          500.136 MHz
SF17          500.136 MHz
SF18          500.136 MHz
SF19          500.136 MHz
SF20          500.136 MHz
SF21          500.136 MHz
SF22          500.136 MHz
SF23          500.136 MHz
SF24          500.136 MHz
SF25          500.136 MHz
SF26          500.136 MHz
SF27          500.136 MHz
SF28          500.136 MHz
SF29          500.136 MHz
SF30          500.136 MHz
SF31          500.136 MHz
SF32          500.136 MHz
SF33          500.136 MHz
SF34          500.136 MHz
SF35          500.136 MHz
SF36          500.136 MHz
SF37          500.136 MHz
SF38          500.136 MHz
SF39          500.136 MHz
SF40          500.136 MHz
SF41          500.136 MHz
SF42          500.136 MHz
SF43          500.136 MHz
SF44          500.136 MHz
SF45          500.136 MHz
SF46          500.136 MHz
SF47          500.136 MHz
SF48          500.136 MHz
SF49          500.136 MHz
SF50          500.136 MHz
SF51          500.136 MHz
SF52          500.136 MHz
SF53          500.136 MHz
SF54          500.136 MHz
SF55          500.136 MHz
SF56          500.136 MHz
SF57          500.136 MHz
SF58          500.136 MHz
SF59          500.136 MHz
SF60          500.136 MHz
SF61          500.136 MHz
SF62          500.136 MHz
SF63          500.136 MHz
SF64          500.136 MHz
SF65          500.136 MHz
SF66          500.136 MHz
SF67          500.136 MHz
SF68          500.136 MHz
SF69          500.136 MHz
SF70          500.136 MHz
SF71          500.136 MHz
SF72          500.136 MHz
SF73          500.136 MHz
SF74          500.136 MHz
SF75          500.136 MHz
SF76          500.136 MHz
SF77          500.136 MHz
SF78          500.136 MHz
SF79          500.136 MHz
SF80          500.136 MHz
SF81          500.136 MHz
SF82          500.136 MHz
SF83          500.136 MHz
SF84          500.136 MHz
SF85          500.136 MHz
SF86          500.136 MHz
SF87          500.136 MHz
SF88          500.136 MHz
SF89          500.136 MHz
SF90          500.136 MHz
SF91          500.136 MHz
SF92          500.136 MHz
SF93          500.136 MHz
SF94          500.136 MHz
SF95          500.136 MHz
SF96          500.136 MHz
SF97          500.136 MHz
SF98          500.136 MHz
SF99          500.136 MHz
SF100         500.136 MHz

```

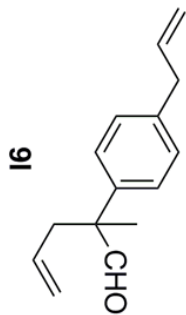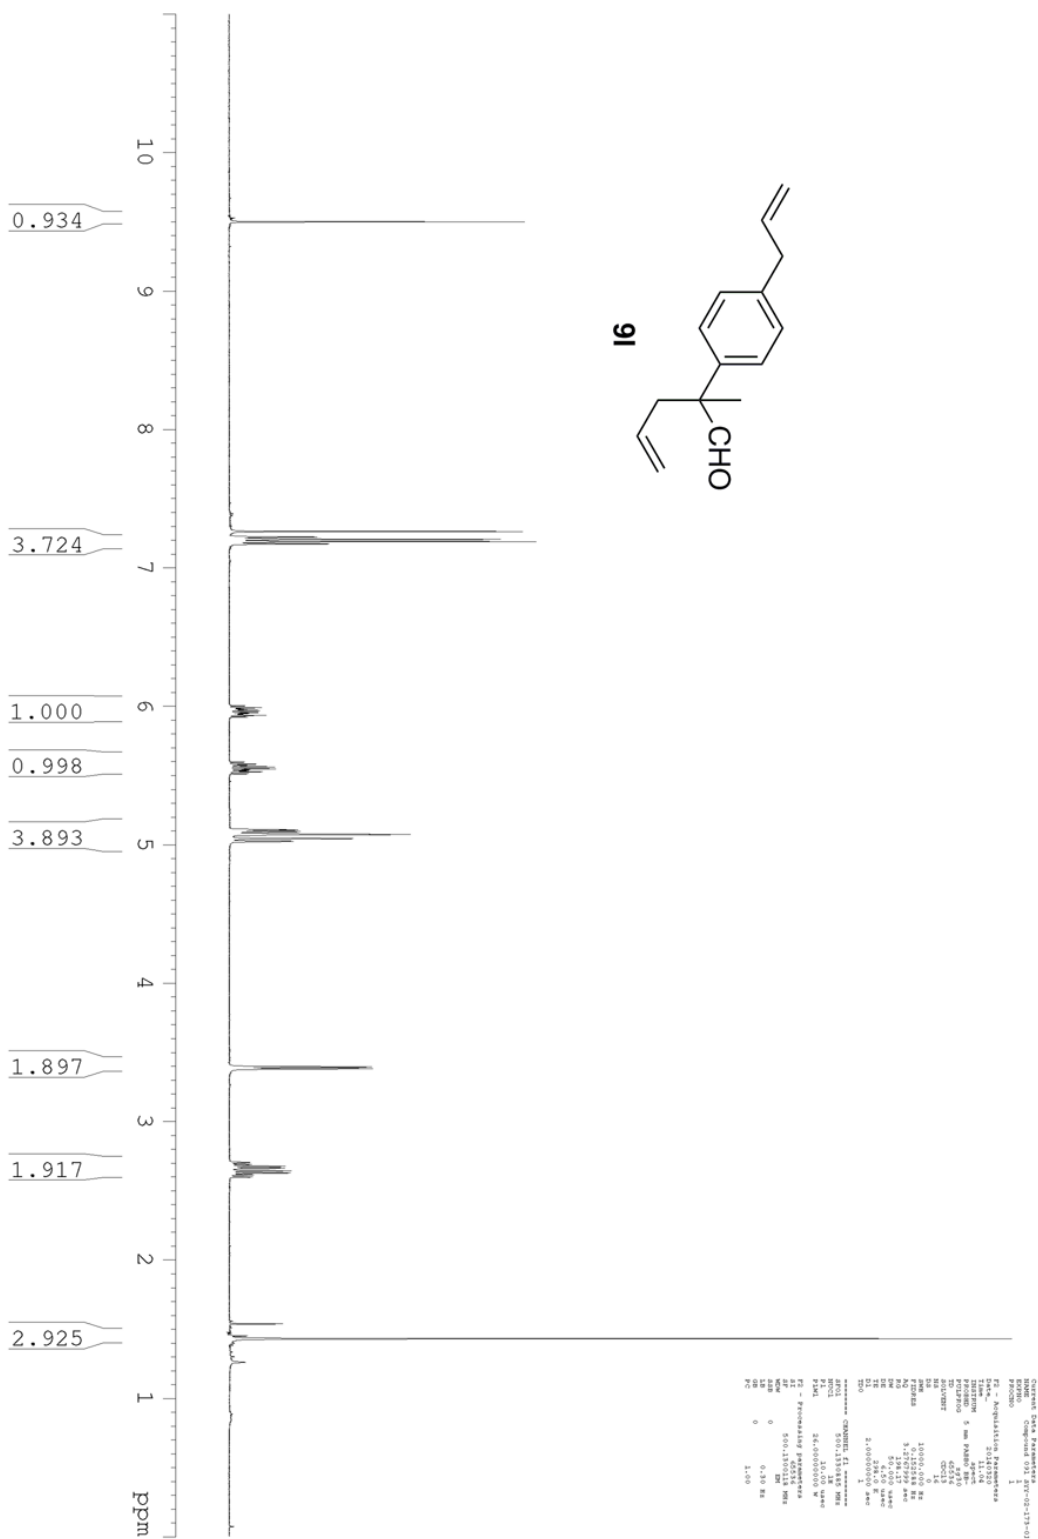



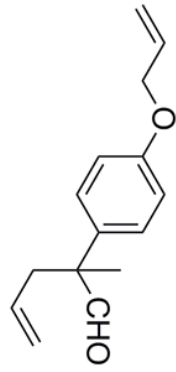

9m

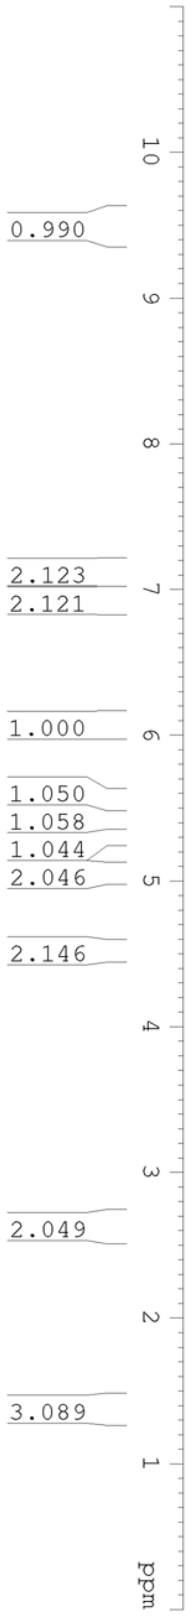

```

NAME: 2441_Propenal
NAME: Compound 5m d7v-02-147-01
PROCNO: 1
-----
F2 - Acquisition Parameters
Date_   : 201407
Time    : 14.13
INSTRUM: spect
PROBHD1 : 5 mm HMR/1H
PULPROG : zgpg30
AQ       : 4.214
RG       : 655.4
SFO      : 500.136191
D1       : 1.00
DELTA    : 0.01
AQ2      : 0.01
RG2      : 1
SFO2     : 500.136191
===== CHANNEL f1 =====
NUC1     : 13C
PUL1     : zgpg30
PRG1     : f2
F2 - Processing parameters
Date_   : 201407
Time    : 14.13
INSTRUM: spect
PROBHD1 : 5 mm HMR/1H
PULPROG : zgpg30
AQ       : 4.214
RG       : 655.4
SFO      : 500.136191
D1       : 1.00
DELTA    : 0.01
AQ2      : 0.01
RG2      : 1
SFO2     : 500.136191
=====
  
```



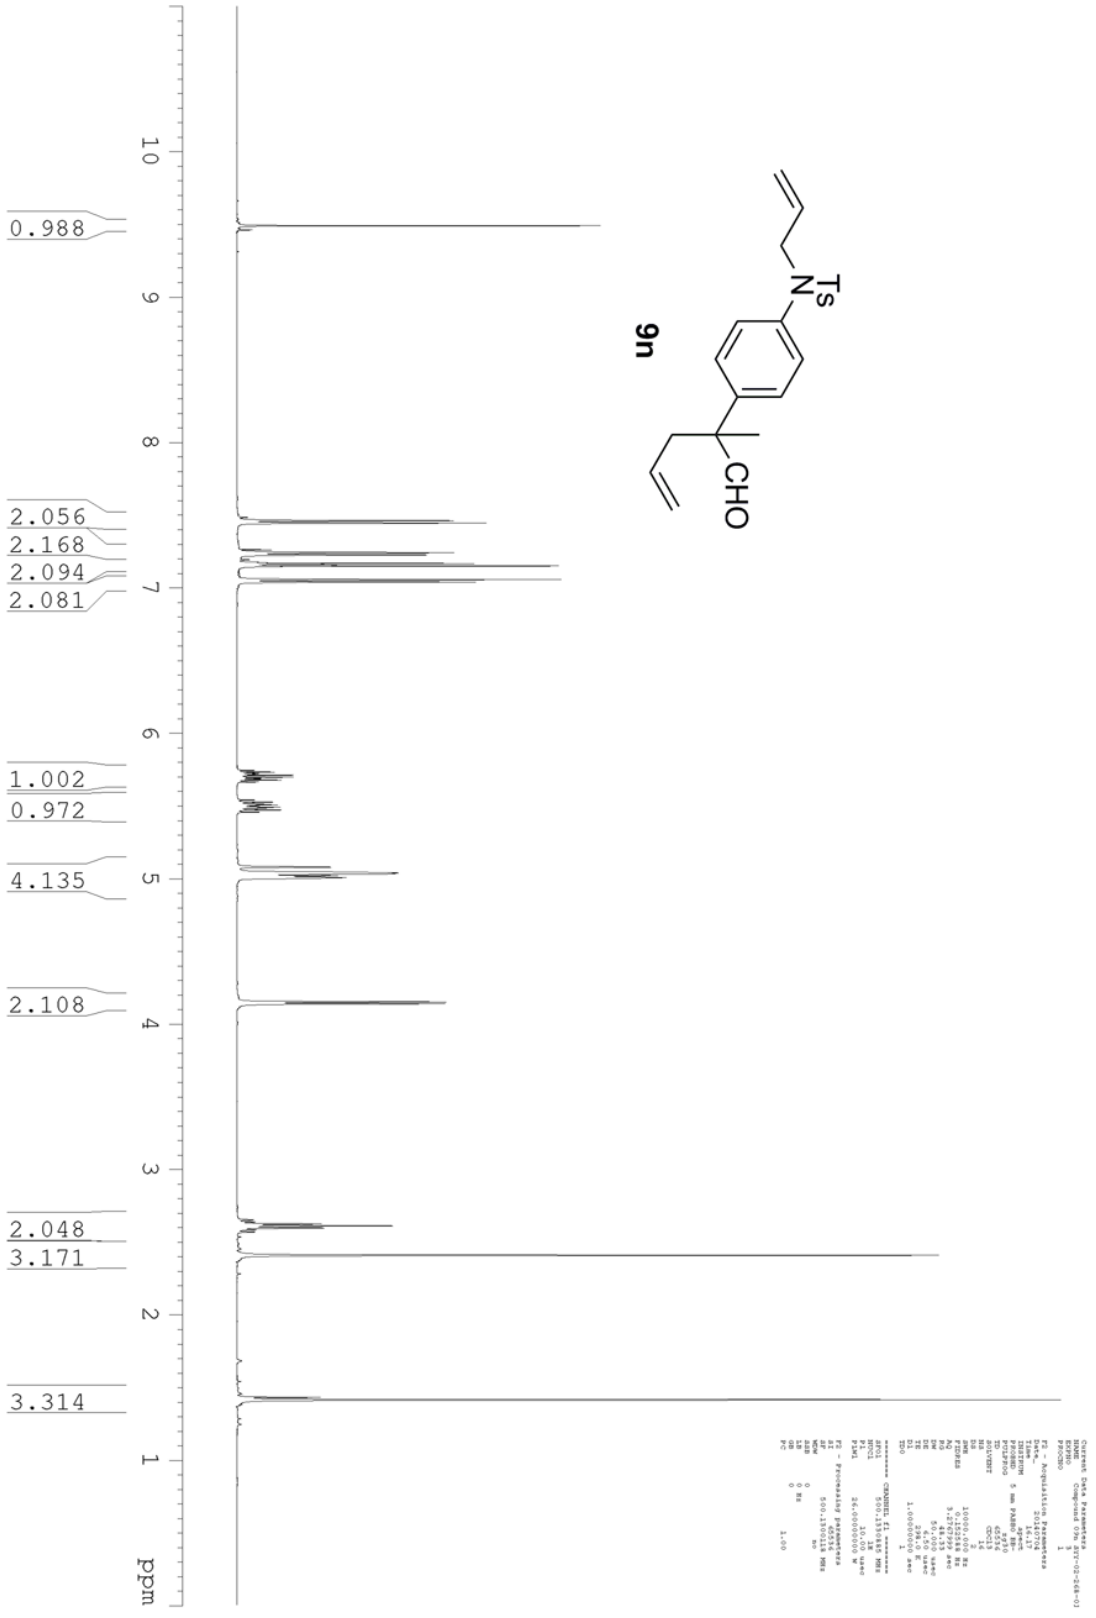



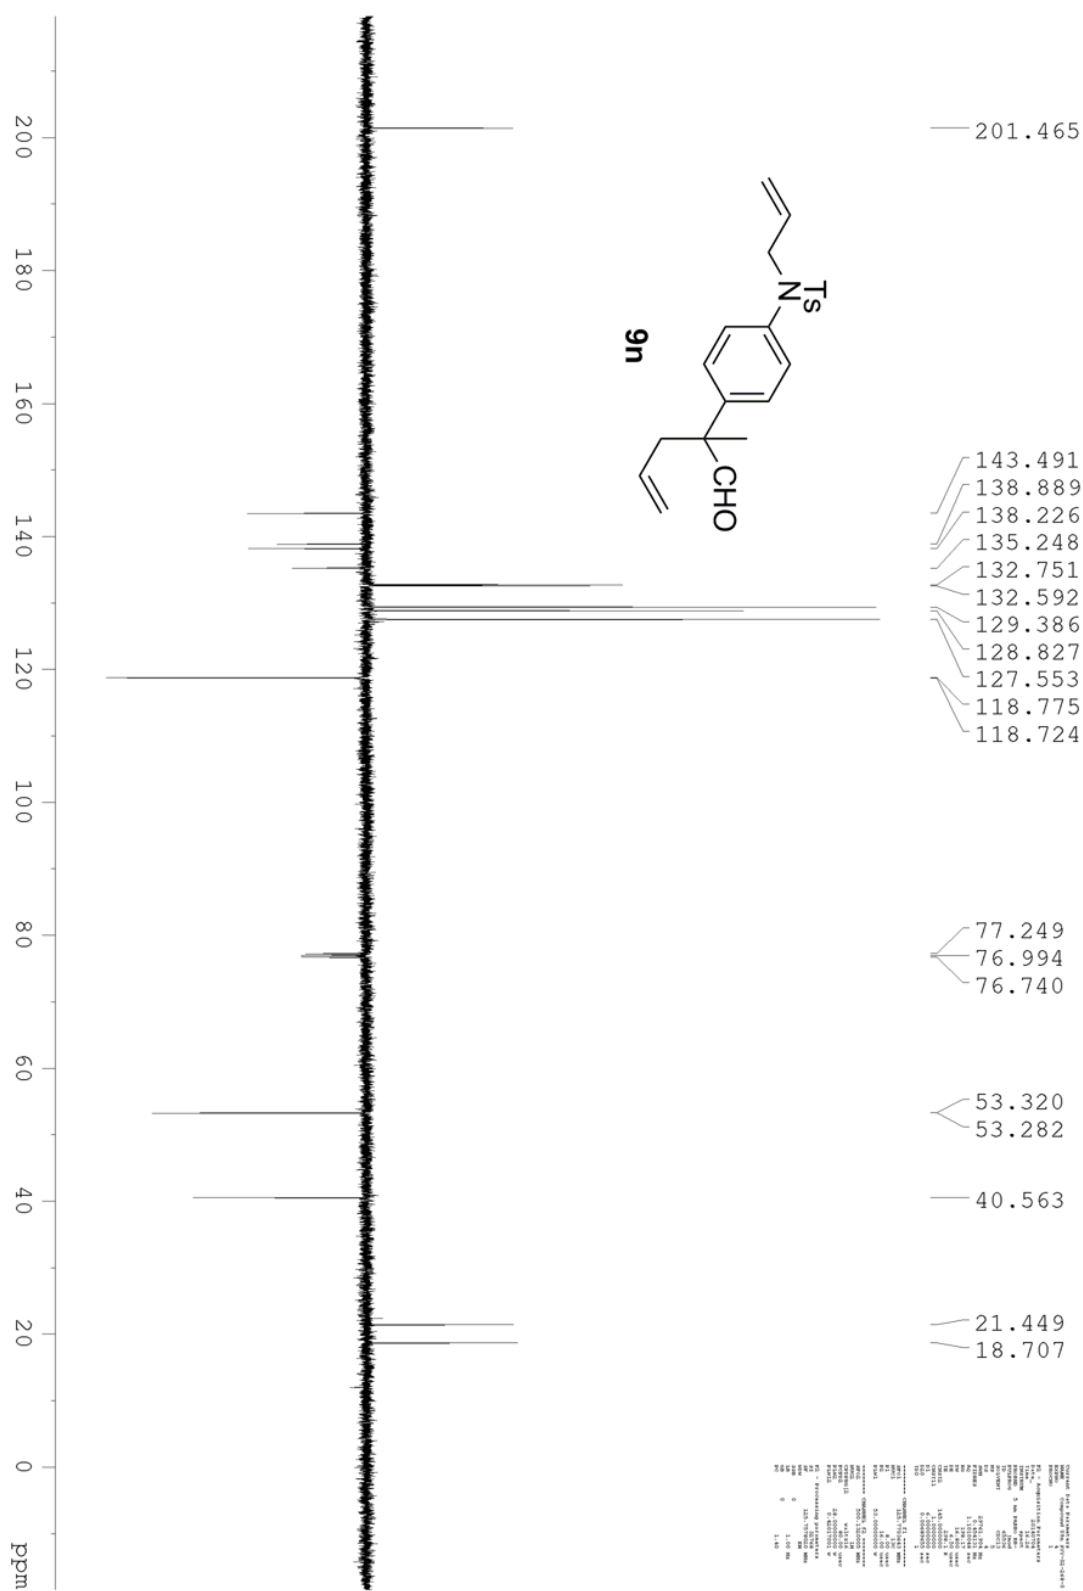





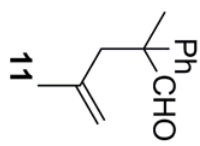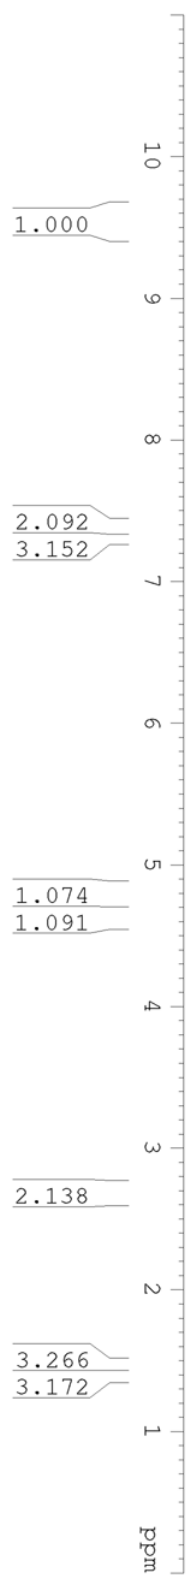

```

NAME: 11
EXPNO: 1
PROCNO: 1
PROCPS: 1
SOLVENT: CDCl3
Date_ 2011.04.12
Time: 10.00
INSTRUM: spect
PROBHD: 5 mm BBO-500
PULPROG: zgpg30
AQ: 0.0318
RG: 655.5
SFO: 500.135061
WDW: EM
SSB: 0
GB: 0
PC: 1.00

===== CHANNEL f1 =====
NUC1: 13C
P1: 1.00
PCPD1: 9.40
SFO1: 101.625400
AQ1: 0.0318
RG1: 655.5
SFO2: 500.135061
WDW2: EM
SSB2: 0
GB2: 0
PC2: 1.00

===== CHANNEL f2 =====
NUC2: 1H
P2: 0.0001
PCPD2: 9.40
SFO3: 500.135061
AQ3: 0.0318
RG3: 655.5
SFO4: 500.135061
WDW4: EM
SSB4: 0
GB4: 0
PC4: 1.00

===== CHANNEL f3 =====
NUC3: 13C
P3: 1.00
PCPD3: 9.40
SFO5: 101.625400
AQ5: 0.0318
RG5: 655.5
SFO6: 500.135061
WDW6: EM
SSB6: 0
GB6: 0
PC6: 1.00

===== CHANNEL f4 =====
NUC4: 1H
P4: 0.0001
PCPD4: 9.40
SFO7: 500.135061
AQ7: 0.0318
RG7: 655.5
SFO8: 500.135061
WDW8: EM
SSB8: 0
GB8: 0
PC8: 1.00

===== CHANNEL f5 =====
NUC5: 13C
P5: 1.00
PCPD5: 9.40
SFO9: 101.625400
AQ9: 0.0318
RG9: 655.5
SFO10: 500.135061
WDW10: EM
SSB10: 0
GB10: 0
PC10: 1.00

===== CHANNEL f6 =====
NUC6: 1H
P6: 0.0001
PCPD6: 9.40
SFO11: 500.135061
AQ11: 0.0318
RG11: 655.5
SFO12: 500.135061
WDW12: EM
SSB12: 0
GB12: 0
PC12: 1.00

===== CHANNEL f7 =====
NUC7: 13C
P7: 1.00
PCPD7: 9.40
SFO13: 101.625400
AQ13: 0.0318
RG13: 655.5
SFO14: 500.135061
WDW14: EM
SSB14: 0
GB14: 0
PC14: 1.00

===== CHANNEL f8 =====
NUC8: 1H
P8: 0.0001
PCPD8: 9.40
SFO15: 500.135061
AQ15: 0.0318
RG15: 655.5
SFO16: 500.135061
WDW16: EM
SSB16: 0
GB16: 0
PC16: 1.00

```

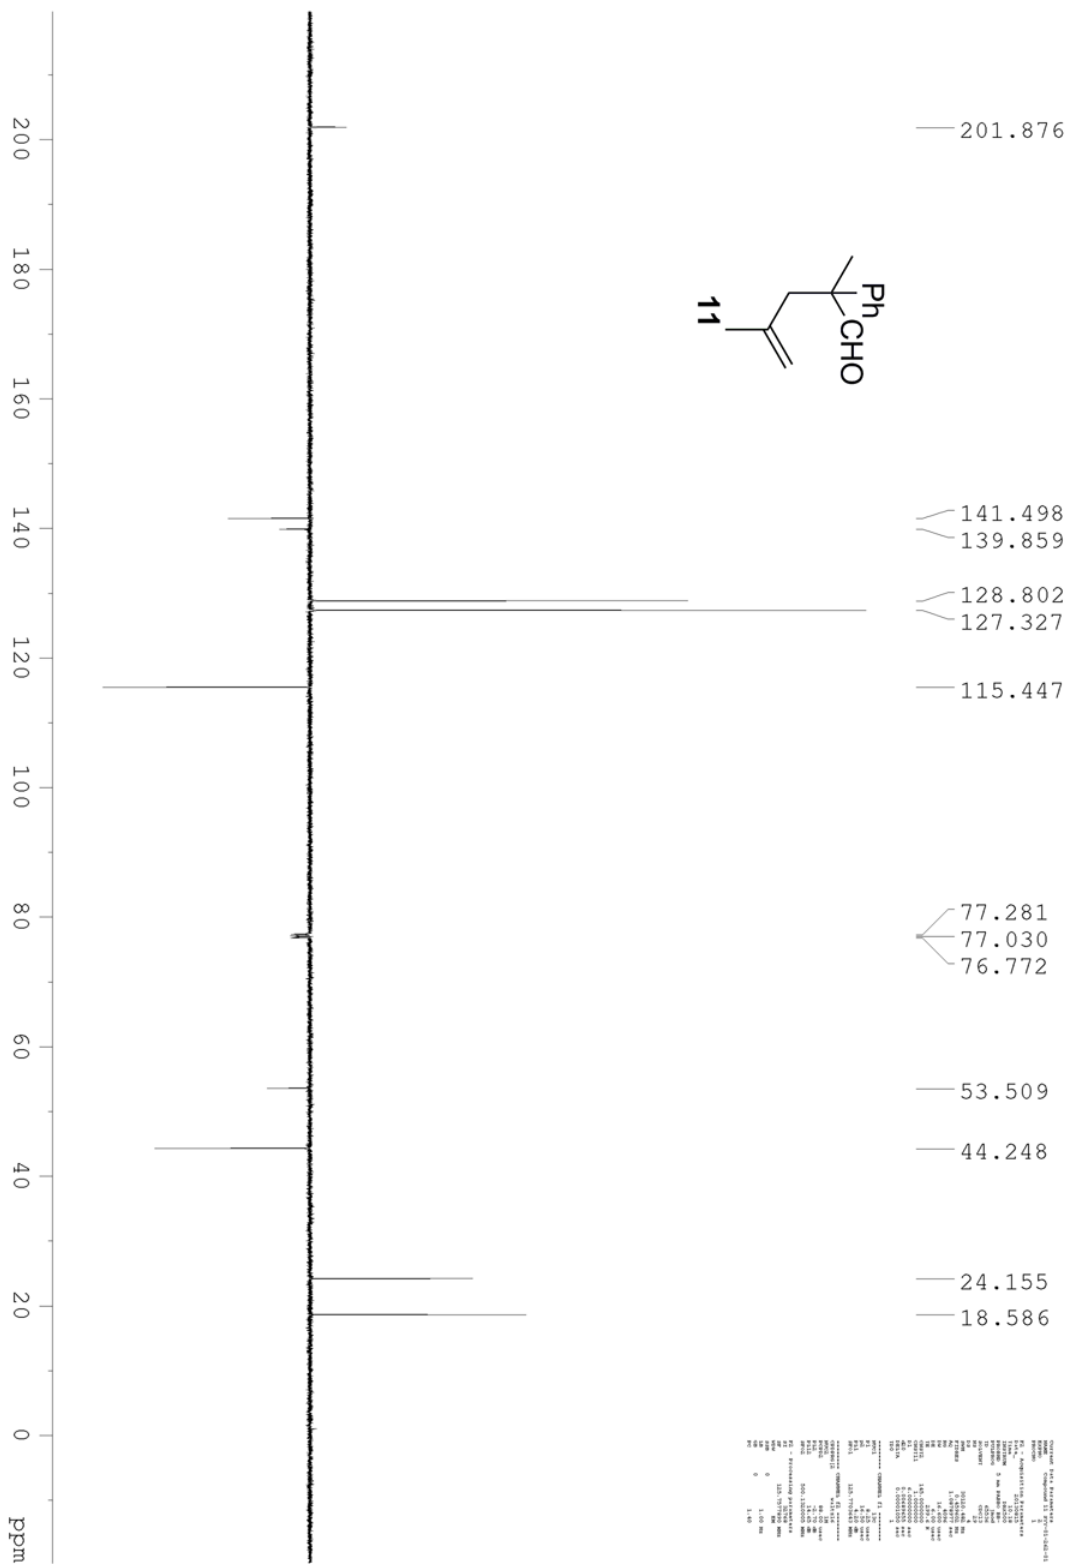

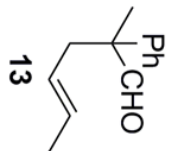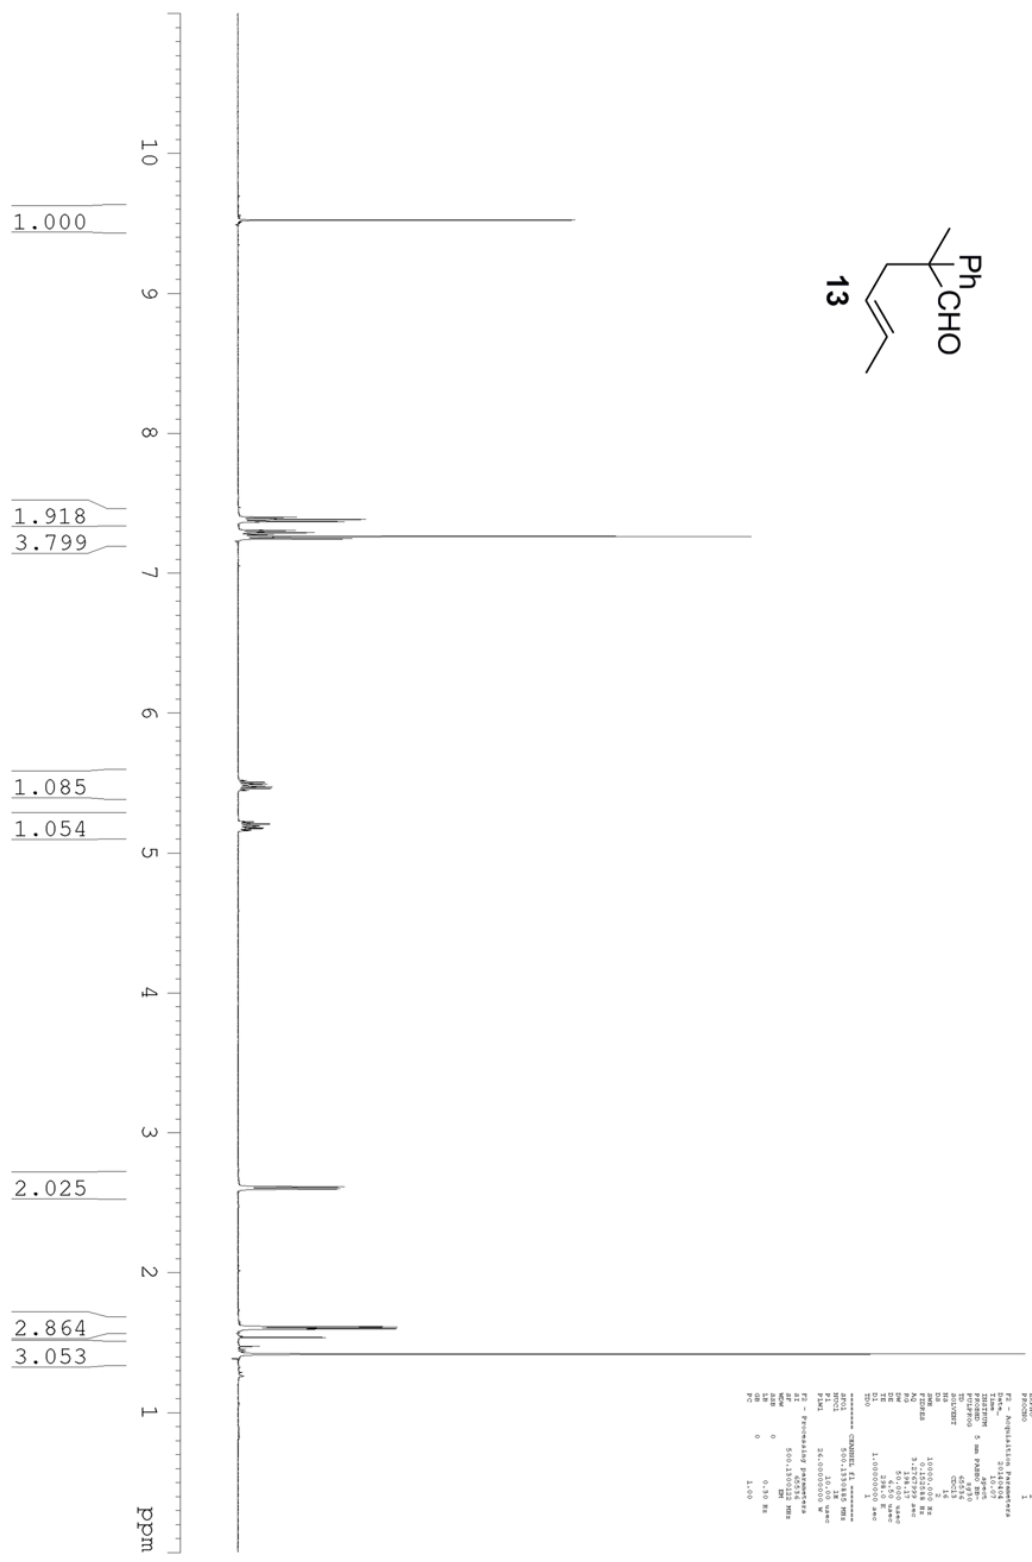

===== CHANNEL f1 =====  
 F2 - Acquisition Parameters  
 Name: 13-13  
 Time: 10:17  
 Date\_UTC: 20120823.10:17:00  
 PROBHD: 5 mm HASTE BBO  
 PULPROG: zgpg30  
 TD: 65536  
 SFO: 500.136261  
 AQ: 1.00000000  
 RG: 14  
 INSTRUM: spect  
 ===== CHANNEL f2 =====  
 Name: 13-13  
 Time: 10:17  
 Date\_UTC: 20120823.10:17:00  
 PROBHD: 5 mm HASTE BBO  
 PULPROG: zgpg30  
 TD: 65536  
 SFO: 500.136261  
 AQ: 1.00000000  
 RG: 14  
 INSTRUM: spect  
 ===== CHANNEL f3 =====  
 Name: 13-13  
 Time: 10:17  
 Date\_UTC: 20120823.10:17:00  
 PROBHD: 5 mm HASTE BBO  
 PULPROG: zgpg30  
 TD: 65536  
 SFO: 500.136261  
 AQ: 1.00000000  
 RG: 14  
 INSTRUM: spect  
 ===== CHANNEL f4 =====  
 Name: 13-13  
 Time: 10:17  
 Date\_UTC: 20120823.10:17:00  
 PROBHD: 5 mm HASTE BBO  
 PULPROG: zgpg30  
 TD: 65536  
 SFO: 500.136261  
 AQ: 1.00000000  
 RG: 14  
 INSTRUM: spect



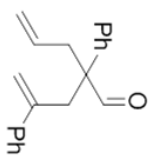

Compound 15b

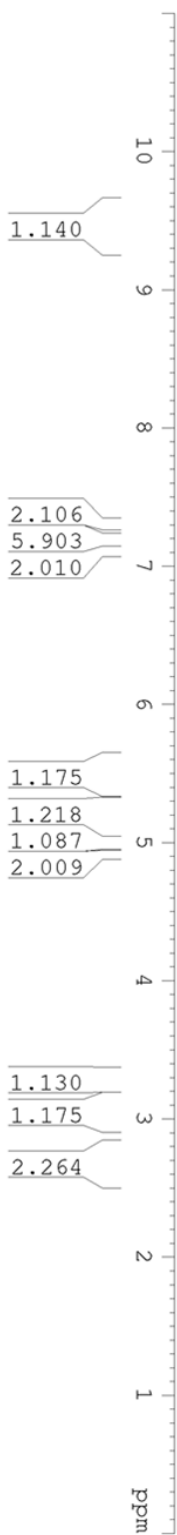

```

NAME: 15b
EXPNO: 1
PROCNO: 1
PROCPS: 1
SOLVENT: CDCl3
INSTRUM: spect
PROBHD: 5 mm BBO-400
PULPROG: zgpg30
TD: 65536
AQ: 0.18750000
RG: 512
RT: 1.00
F2 - Acquisition Parameters
Date_UTC: 20230811
Time: 11:43
INSTRUM: spect
PROBHD: 5 mm BBO-400
PULPROG: zgpg30
TD: 65536
AQ: 0.18750000
RG: 512
RT: 1.00
F2 - Processing parameters
SI: 32768
SF: 400.1464000
WDW: EM
SSB: 0
GB: 0
PC: 1.00
  
```



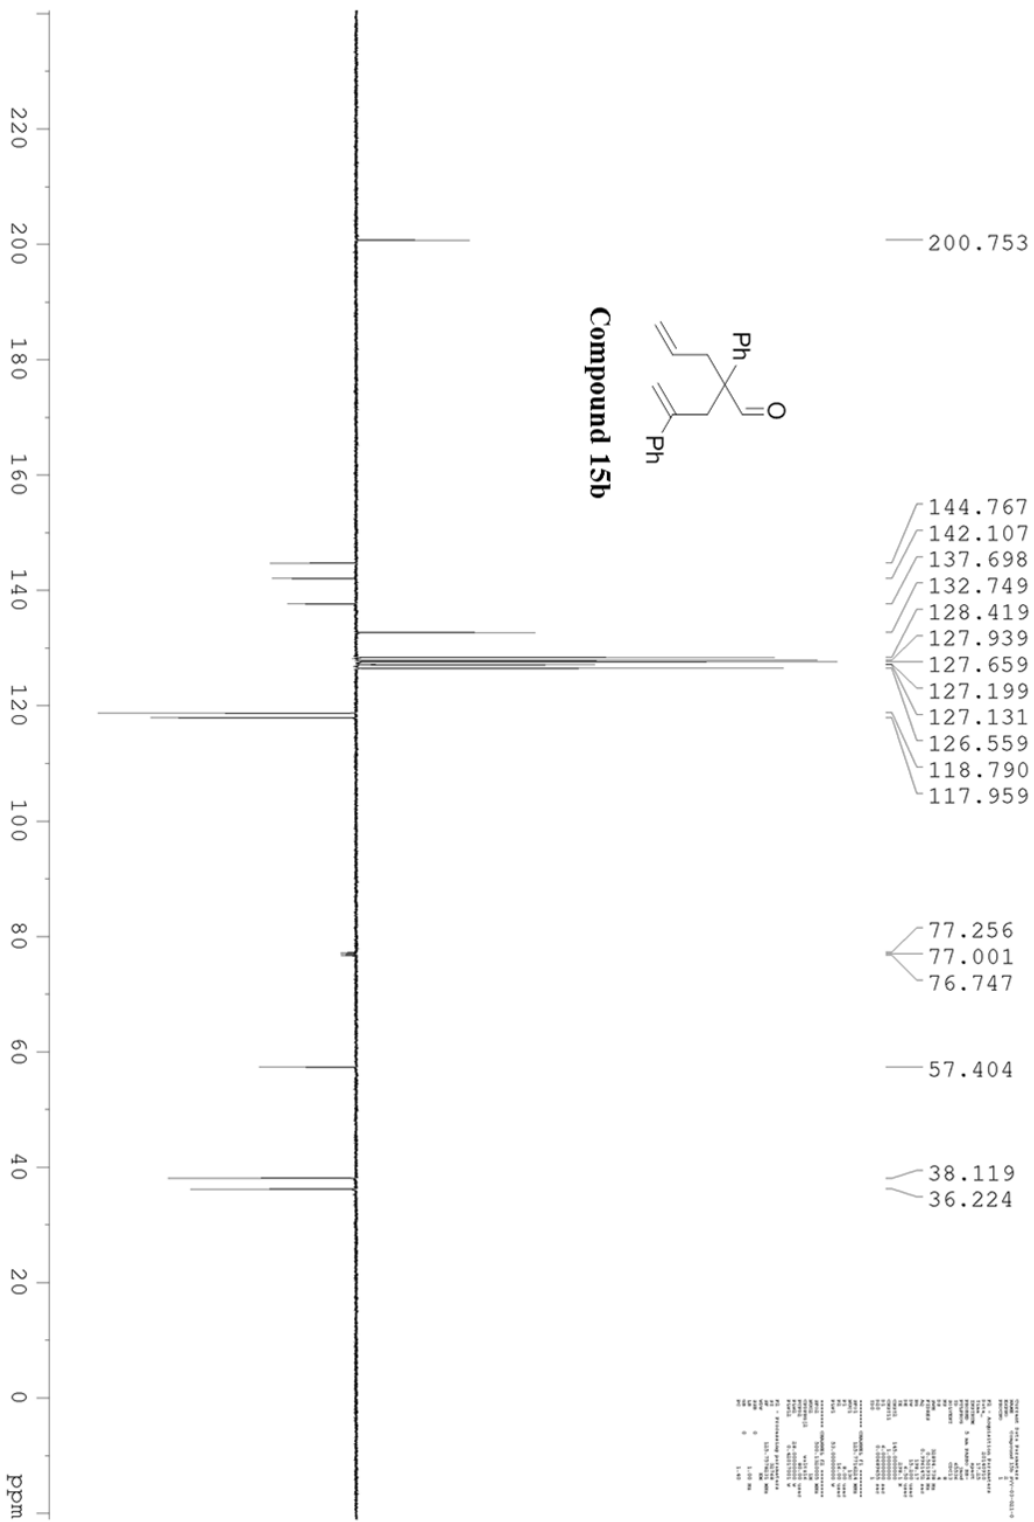

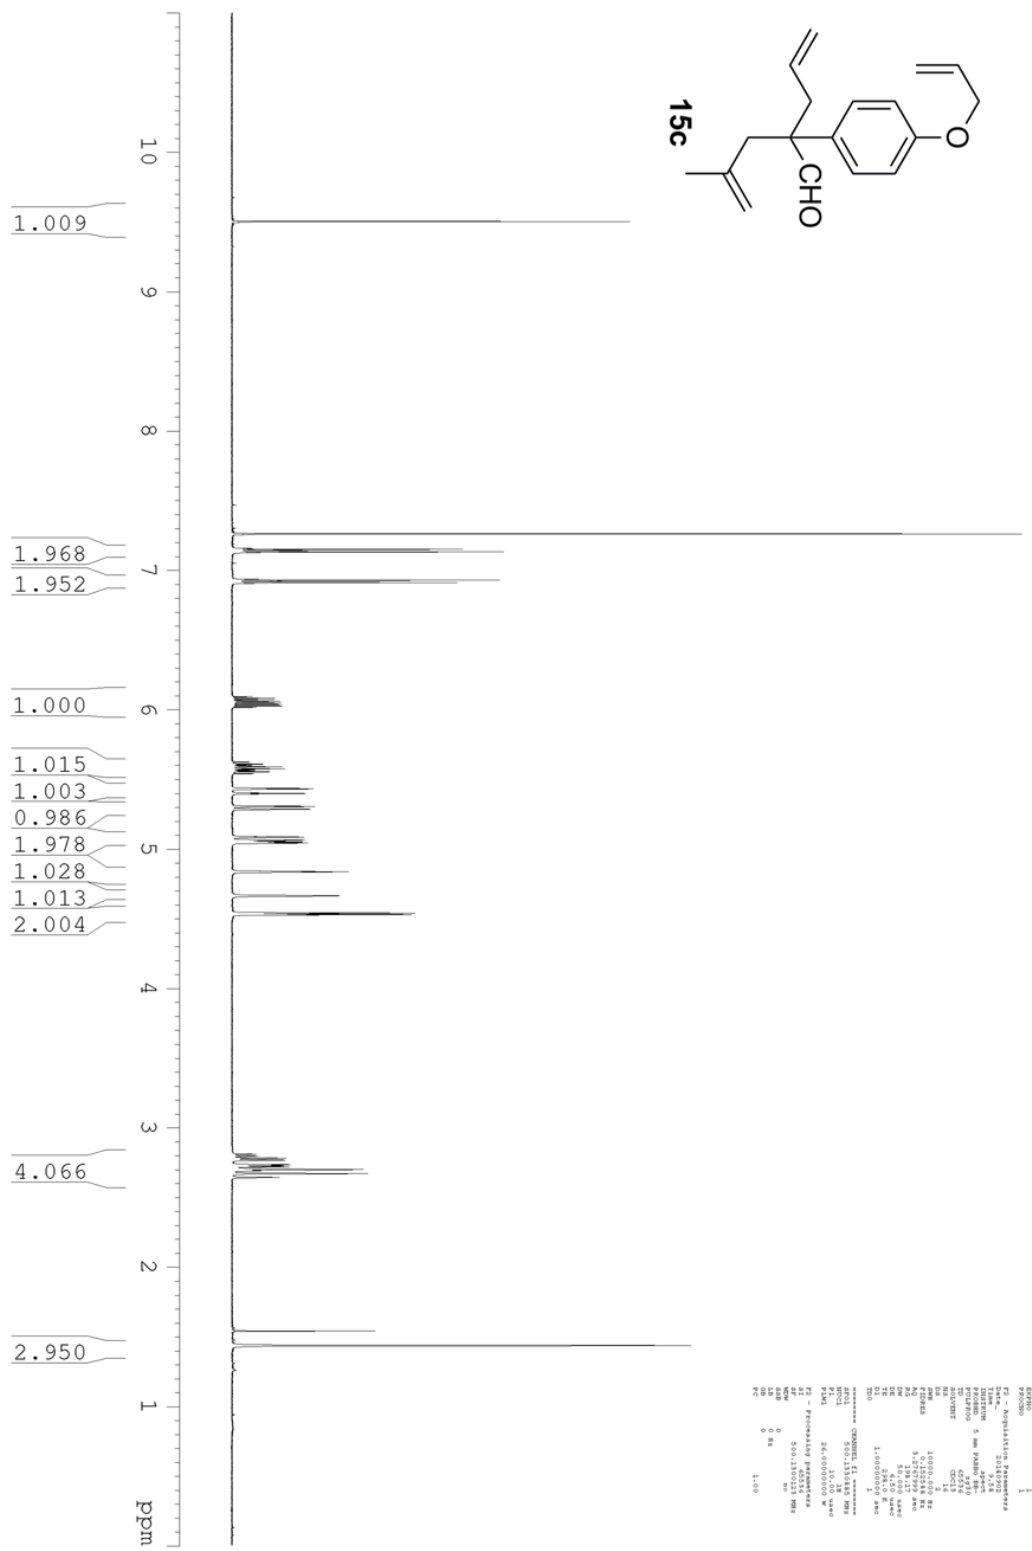

Current Data Parameters  
 Date\_ 20160805  
 Time\_ 20:45:45  
 File\_ 15c  
 F1 - Acquisition Parameters  
 Date\_ 20160805  
 Time\_ 20:45:45  
 F2 - Processing parameters  
 File\_ 15c  
 F3 - Acquisition Parameters  
 Date\_ 20160805  
 Time\_ 20:45:45  
 F4 - Processing parameters  
 File\_ 15c

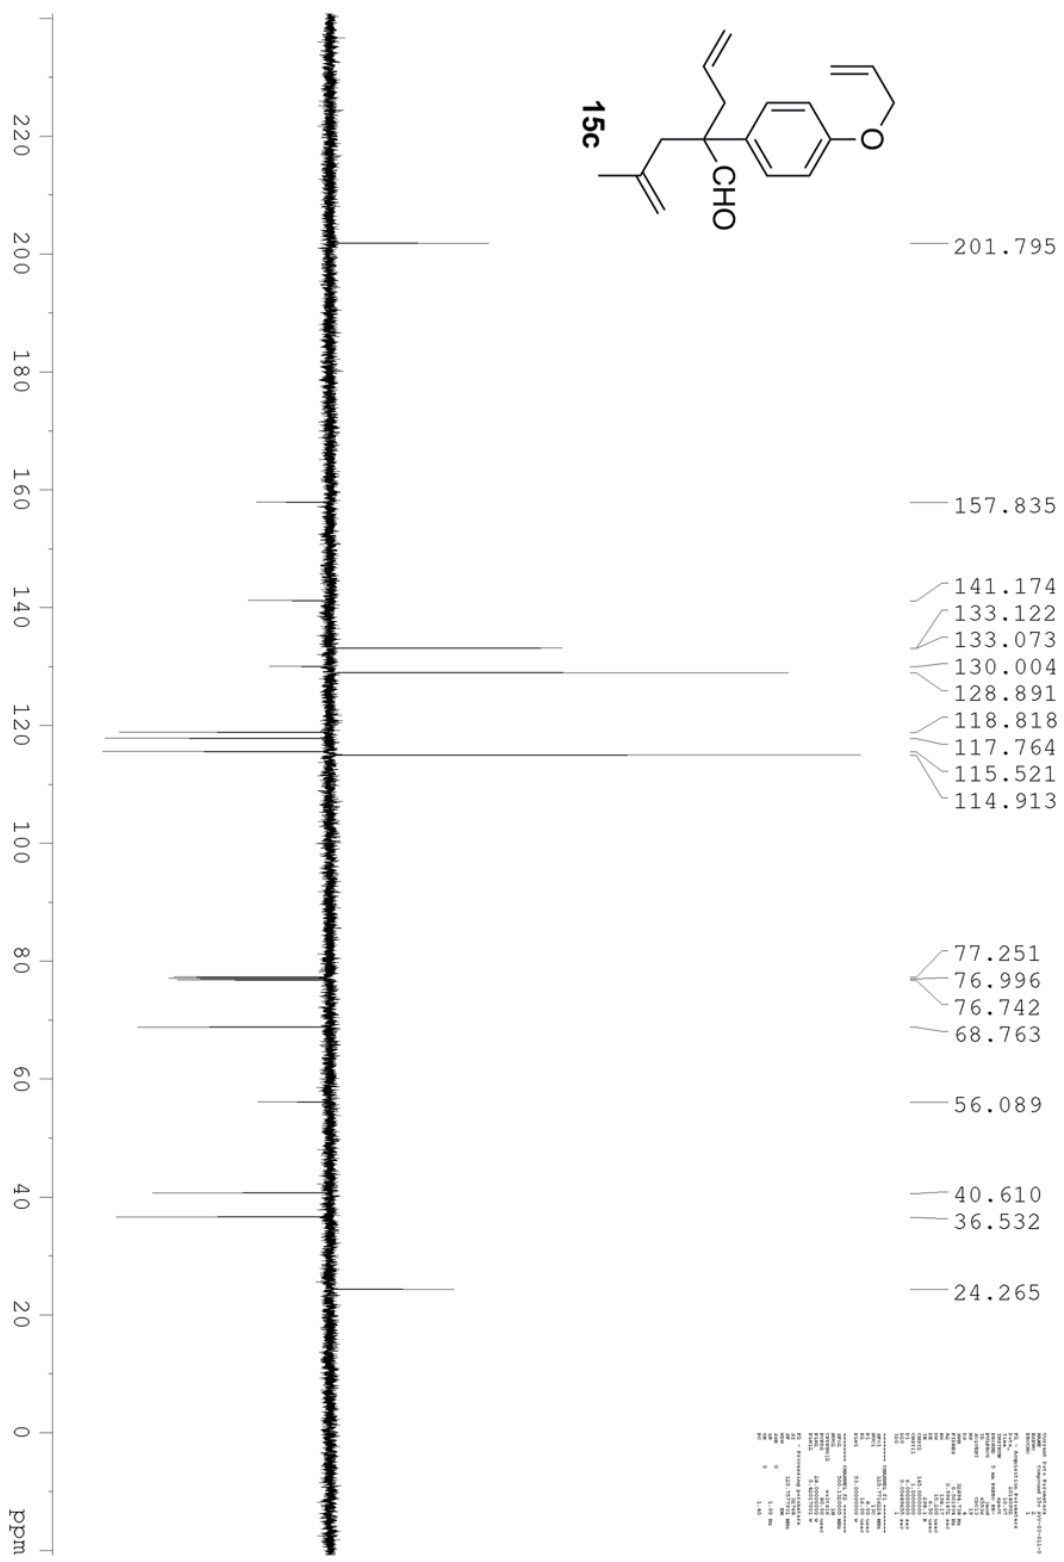

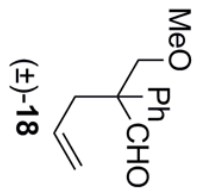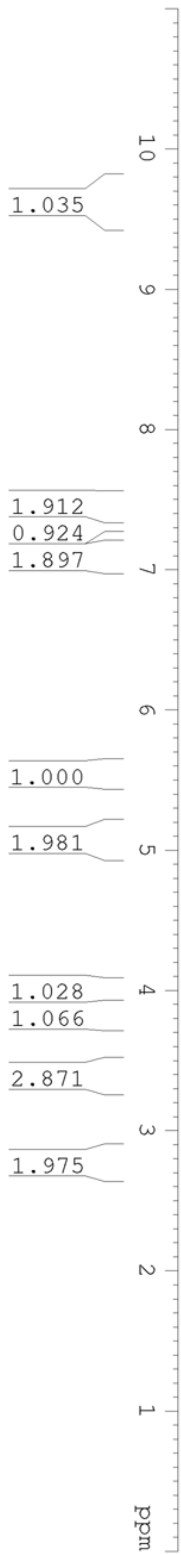

Current Data Parameters  
NAME Compound 18 07/03/01-04-01  
PROCNO 1  
F2 - Acquisition Parameters  
Date\_ Time 07/03/01 11:41  
INSTRUM spect  
PROBHD 5 mm PABBO 1H-1  
PULPROG zgpg30  
NO 1024  
NOFREQ 400.1  
NUC1 13  
NUC2 13  
FREQ 100.625000 MHz  
AQ 5.0000000 sec  
RG 32768.000  
DE 50.0000000 sec  
TE 300.2 K  
D1 1.00000000 sec  
D11 0.00000000 sec  
D12 0.00000000 sec  
D13 0.00000000 sec  
D14 0.00000000 sec  
D15 0.00000000 sec  
D16 0.00000000 sec  
D17 0.00000000 sec  
D18 0.00000000 sec  
D19 0.00000000 sec  
D20 0.00000000 sec  
===== CHANNEL f1 =====  
NUC1 13C  
PULPROG zgpg30  
FREQ 100.625000 MHz  
P1 13.00000000 sec  
PL1 0.00000000 dB  
PL2 0.00000000 dB  
PL3 0.00000000 dB  
PL4 0.00000000 dB  
===== CHANNEL f2 =====  
NUC1 1H  
PULPROG zgpg30  
FREQ 400.147600 MHz  
P1 13.00000000 sec  
PL1 0.00000000 dB  
PL2 0.00000000 dB  
PL3 0.00000000 dB  
PL4 0.00000000 dB



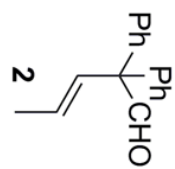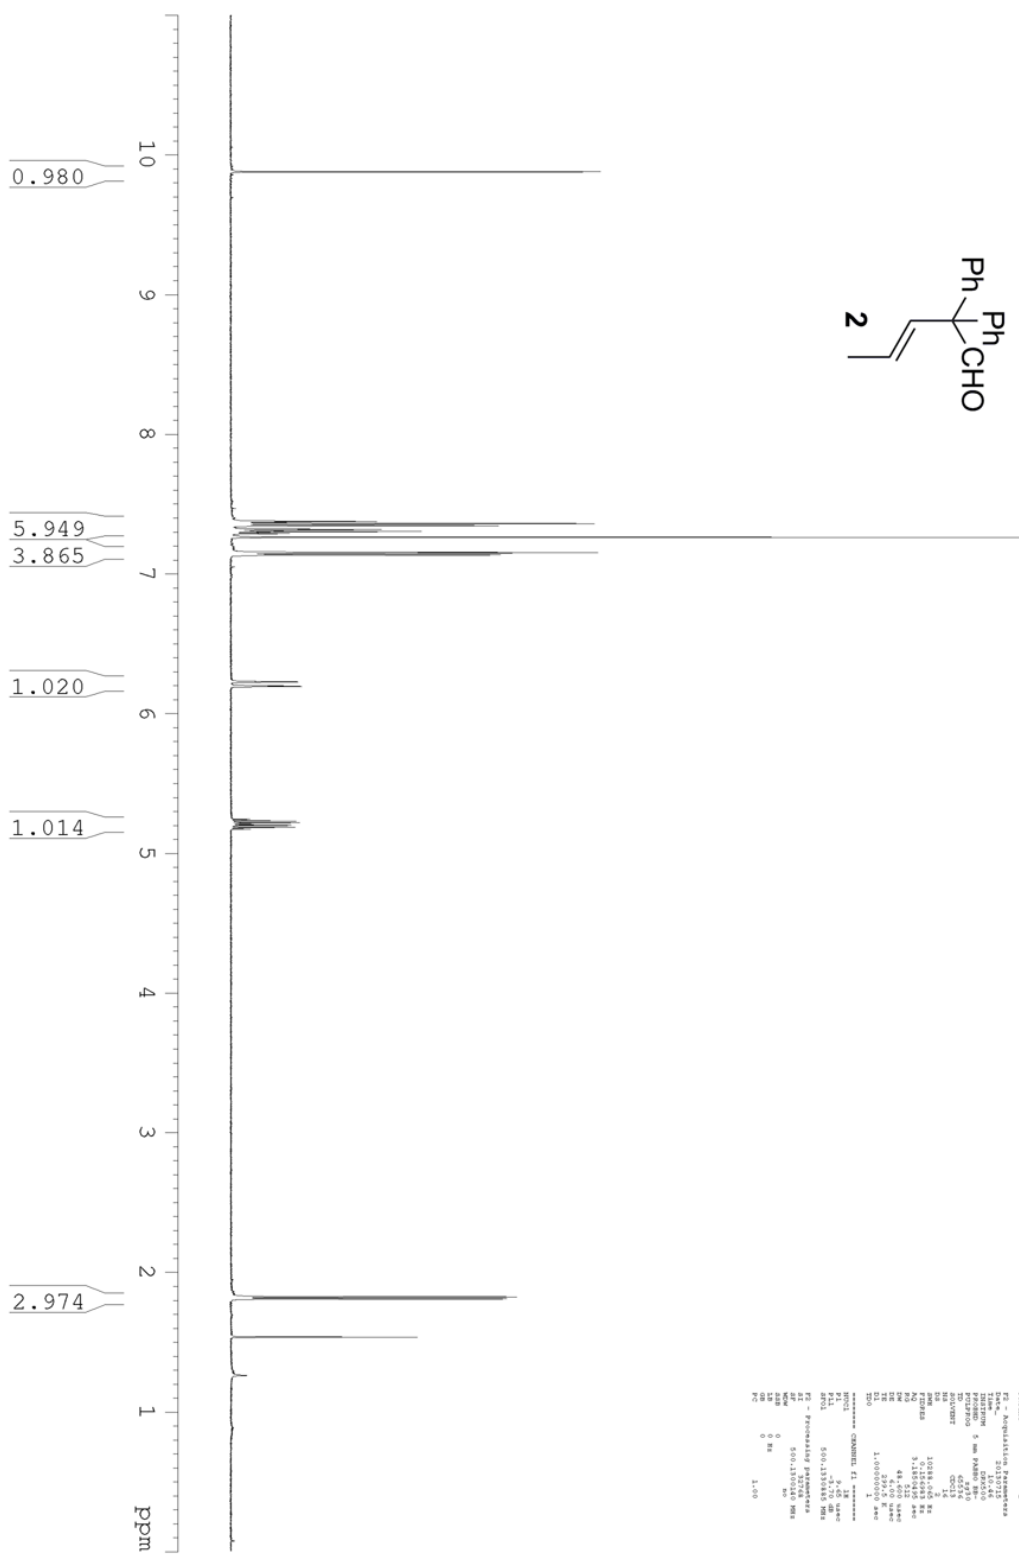

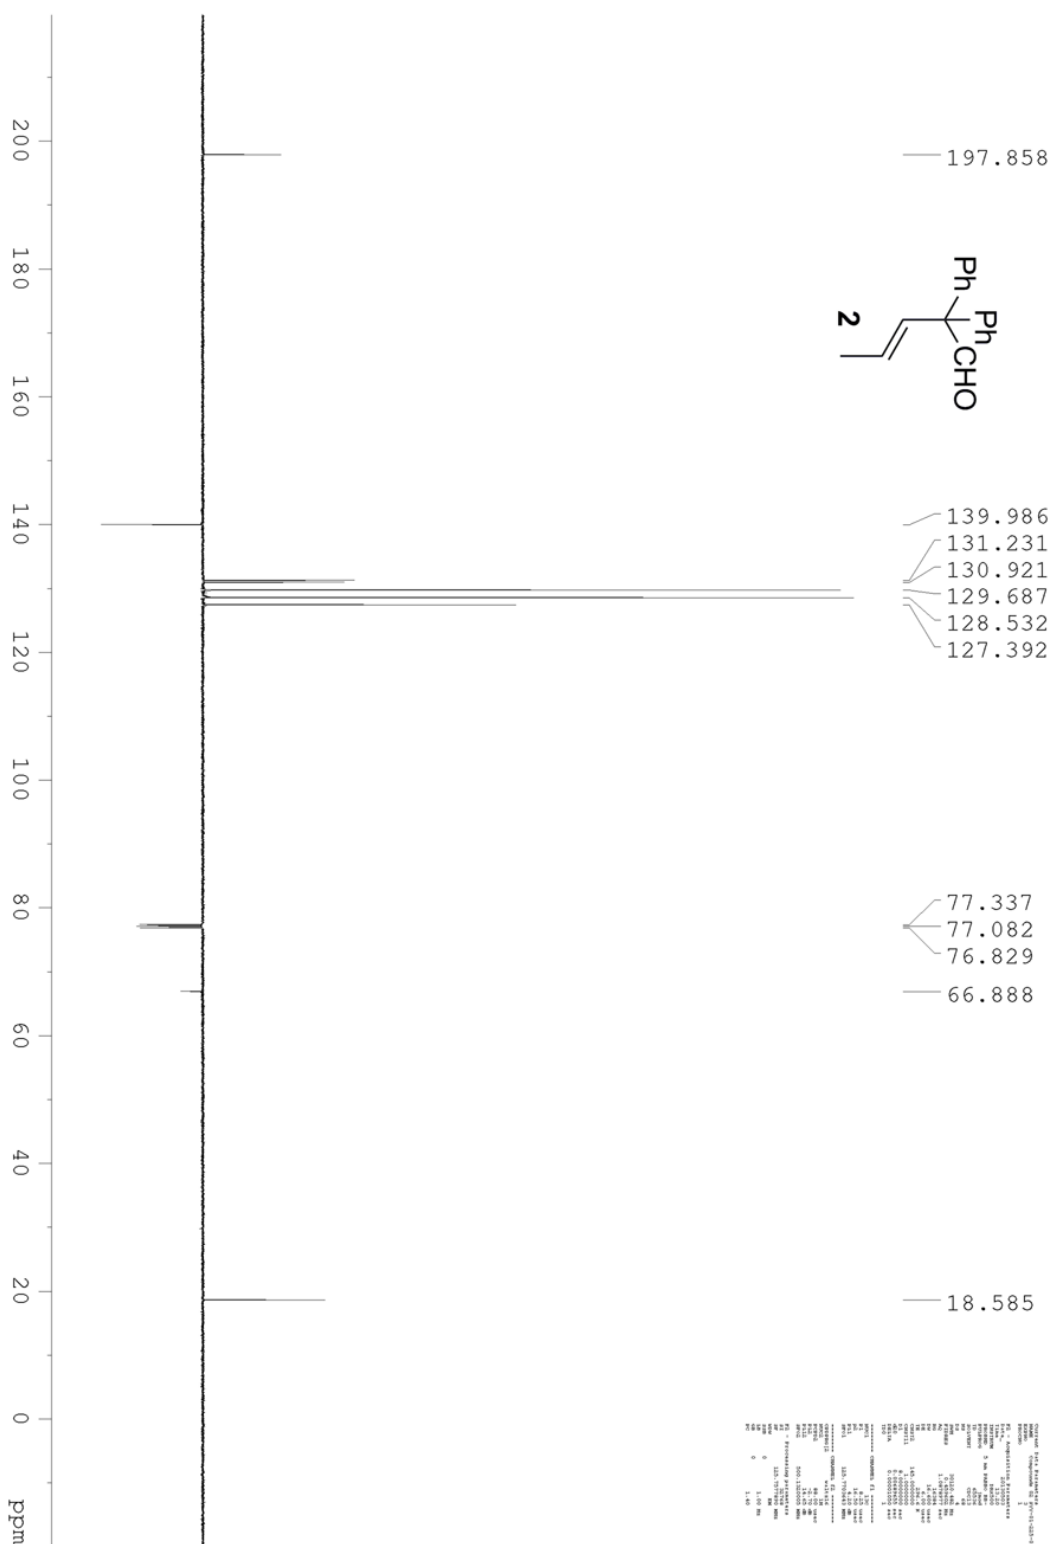

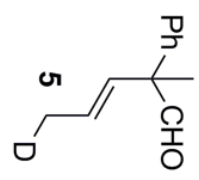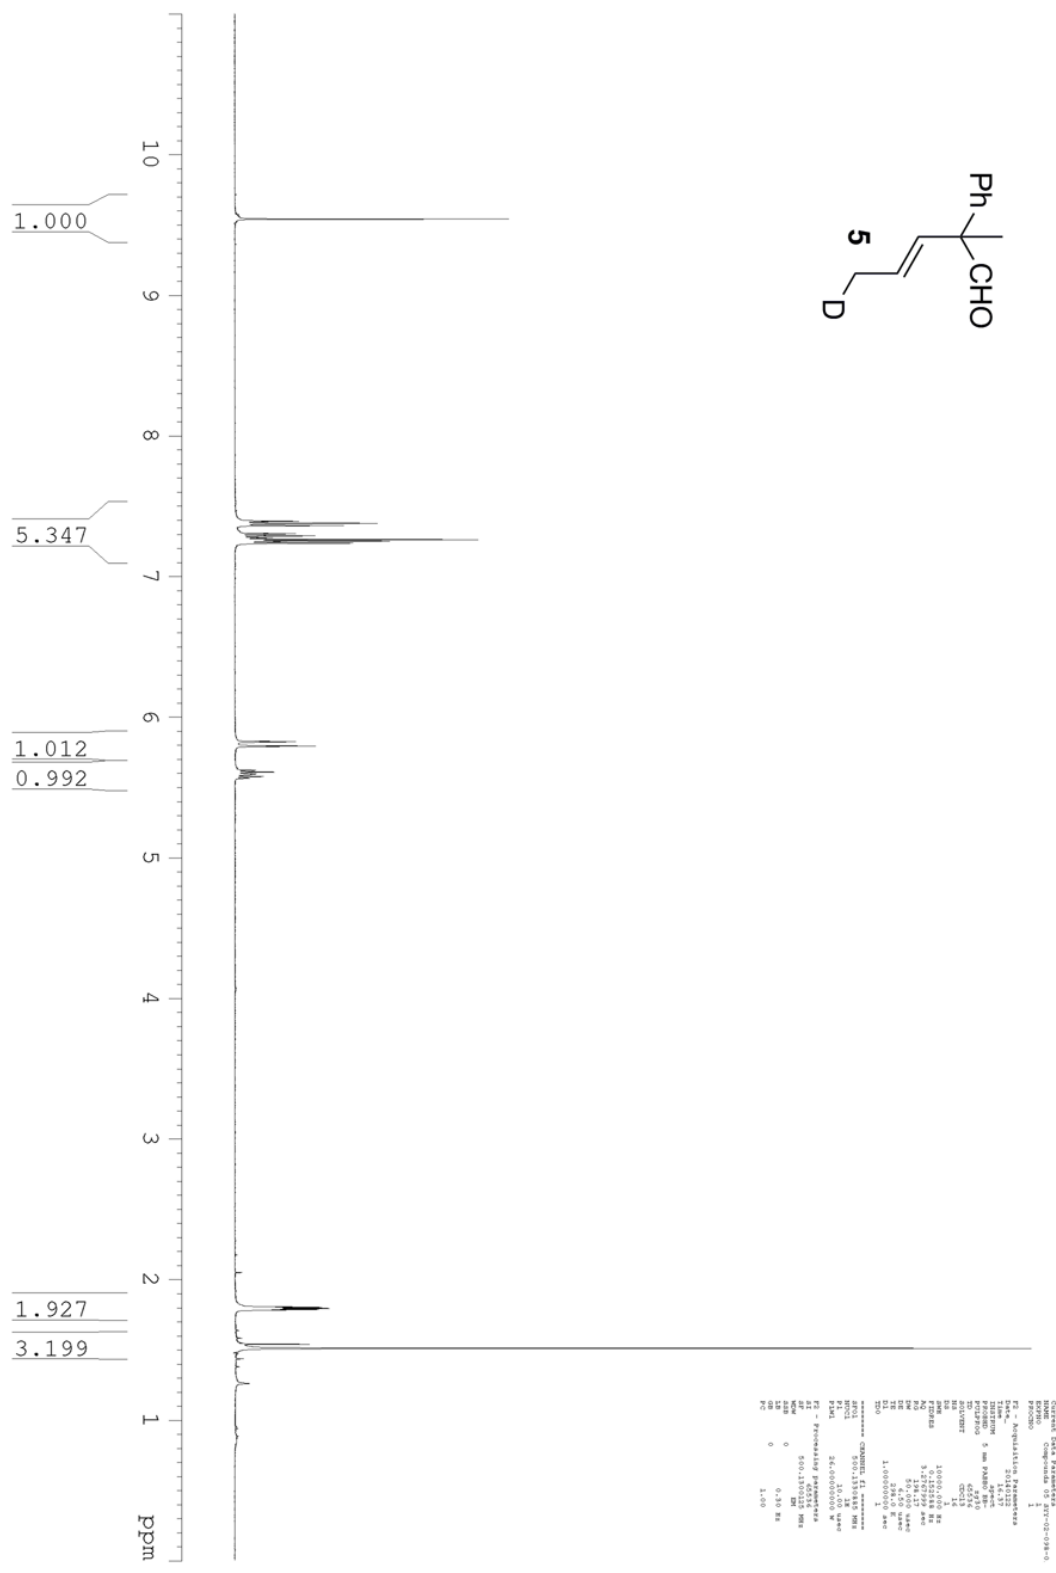



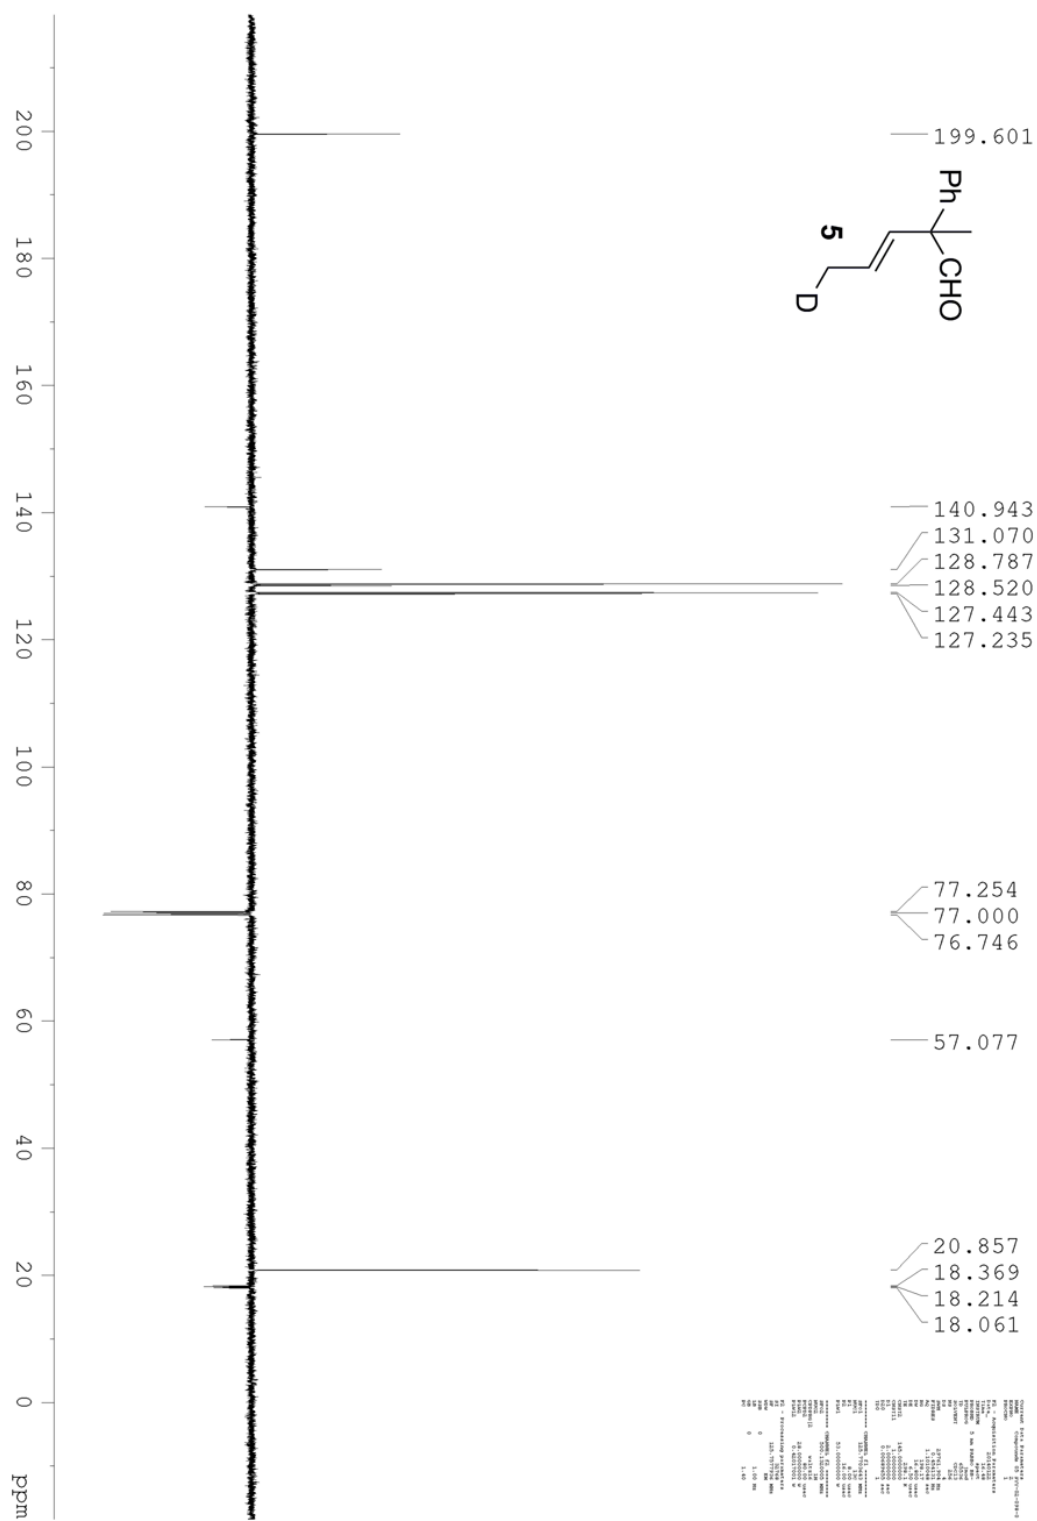



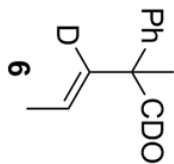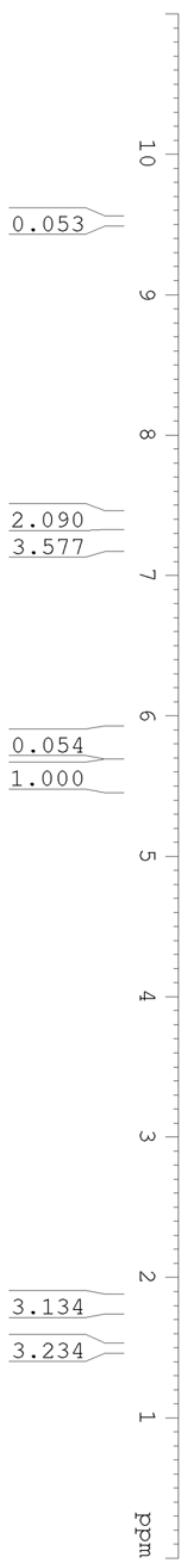

Current Data Parameters  
 NAME Compound de 2017-02-09-01  
 NUMO 1  
 PROCNO 1  
 DE Acetylation 20170209  
 REAGENT 100% MeOH  
 INSTRUM spect  
 F1PRG01 5 mm PROBE WALT  
 PULPROG zgpg30  
 SOLVENT CDCl3  
 NS 1000.000  
 DS 4  
 SWH 10000.000 Hz  
 FZORDE 5.0120218 MHz  
 FID 128.117 MHz  
 AQ 0.16000000 sec  
 TE 300.2 K  
 DE 4.0000000 sec  
 SI 1.00000000 sec  
 ===== CHANNEL f1 =====  
 NU1 500.1308193 MHz  
 PR1 500.1308193 MHz  
 PL1 50.0000000 V  
 PC1 50.0000000 W  
 =====  
 F2 - Protonaluy parameters  
 NU2 500.1308193 MHz  
 PR2 500.1308193 MHz  
 PL2 50.0000000 V  
 PC2 50.0000000 W



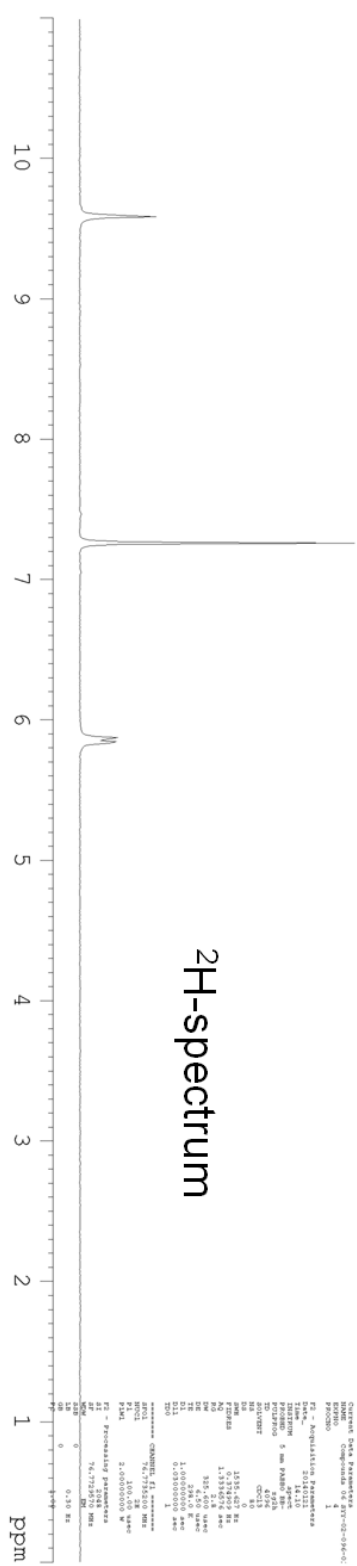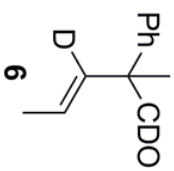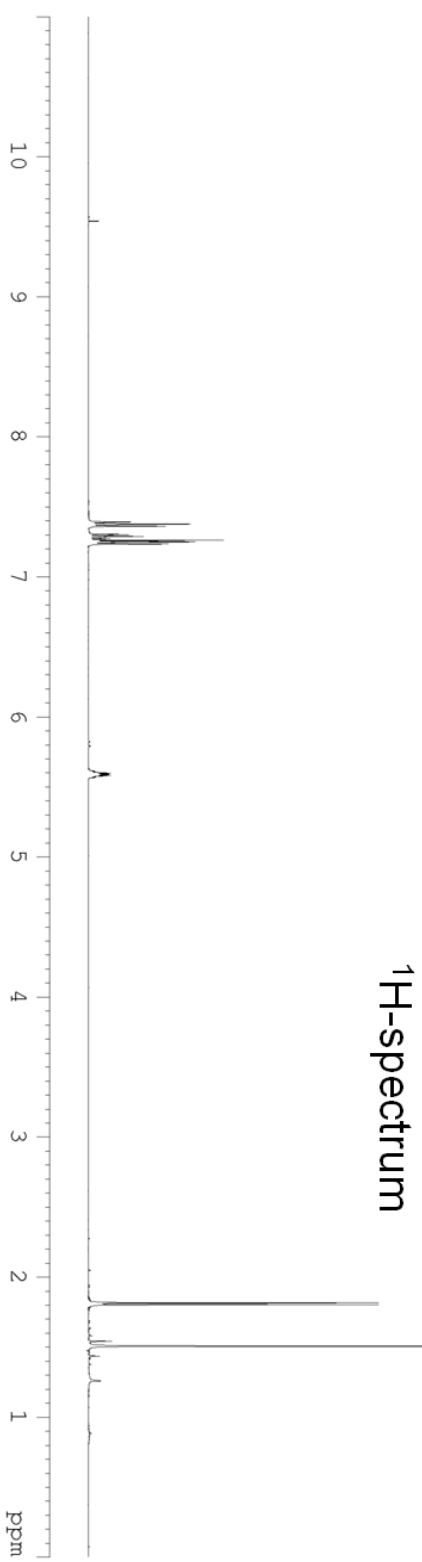

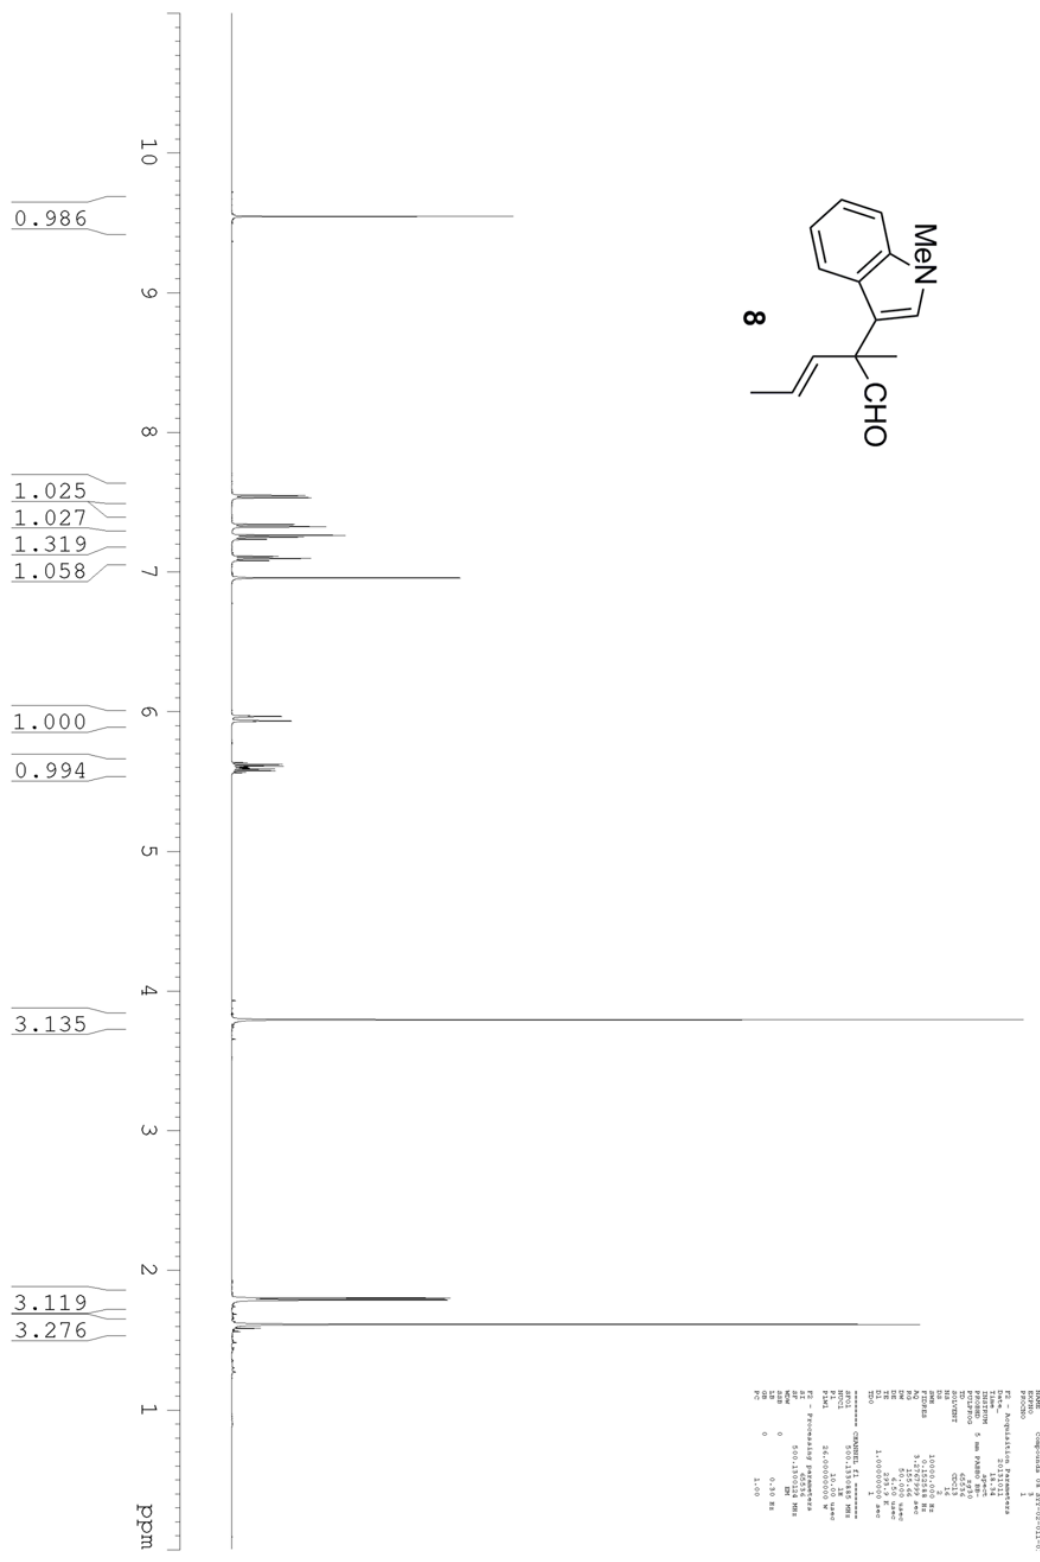



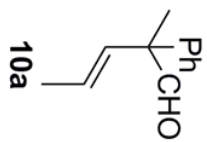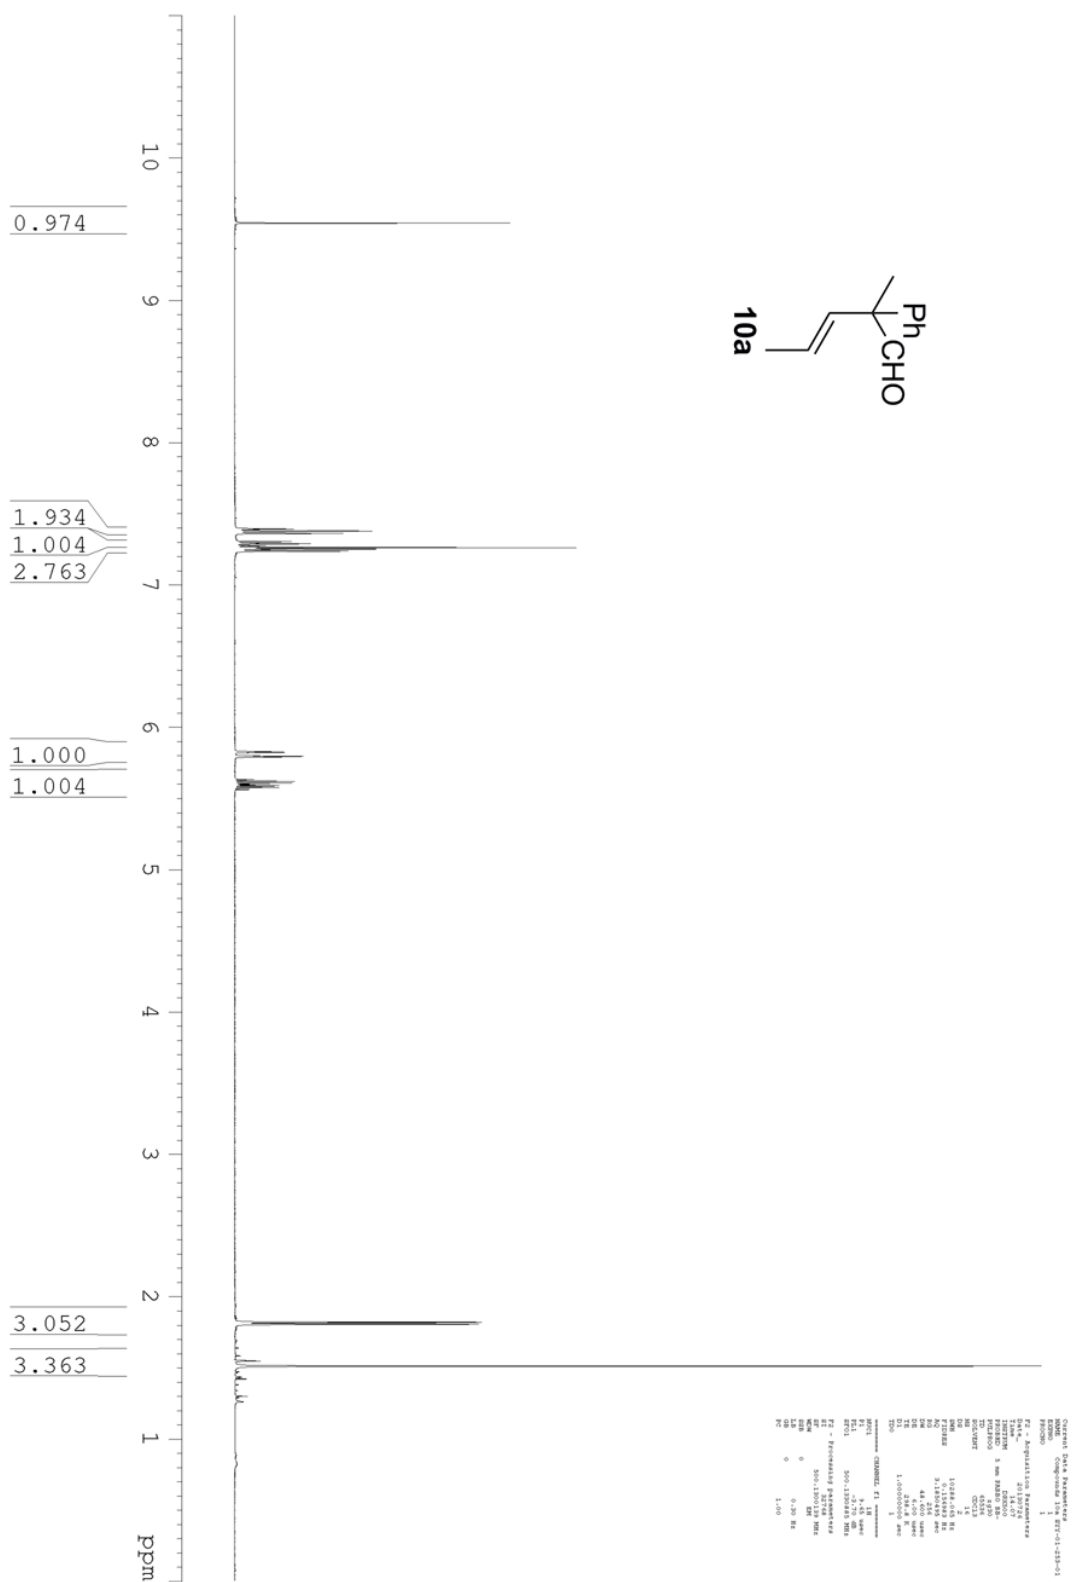



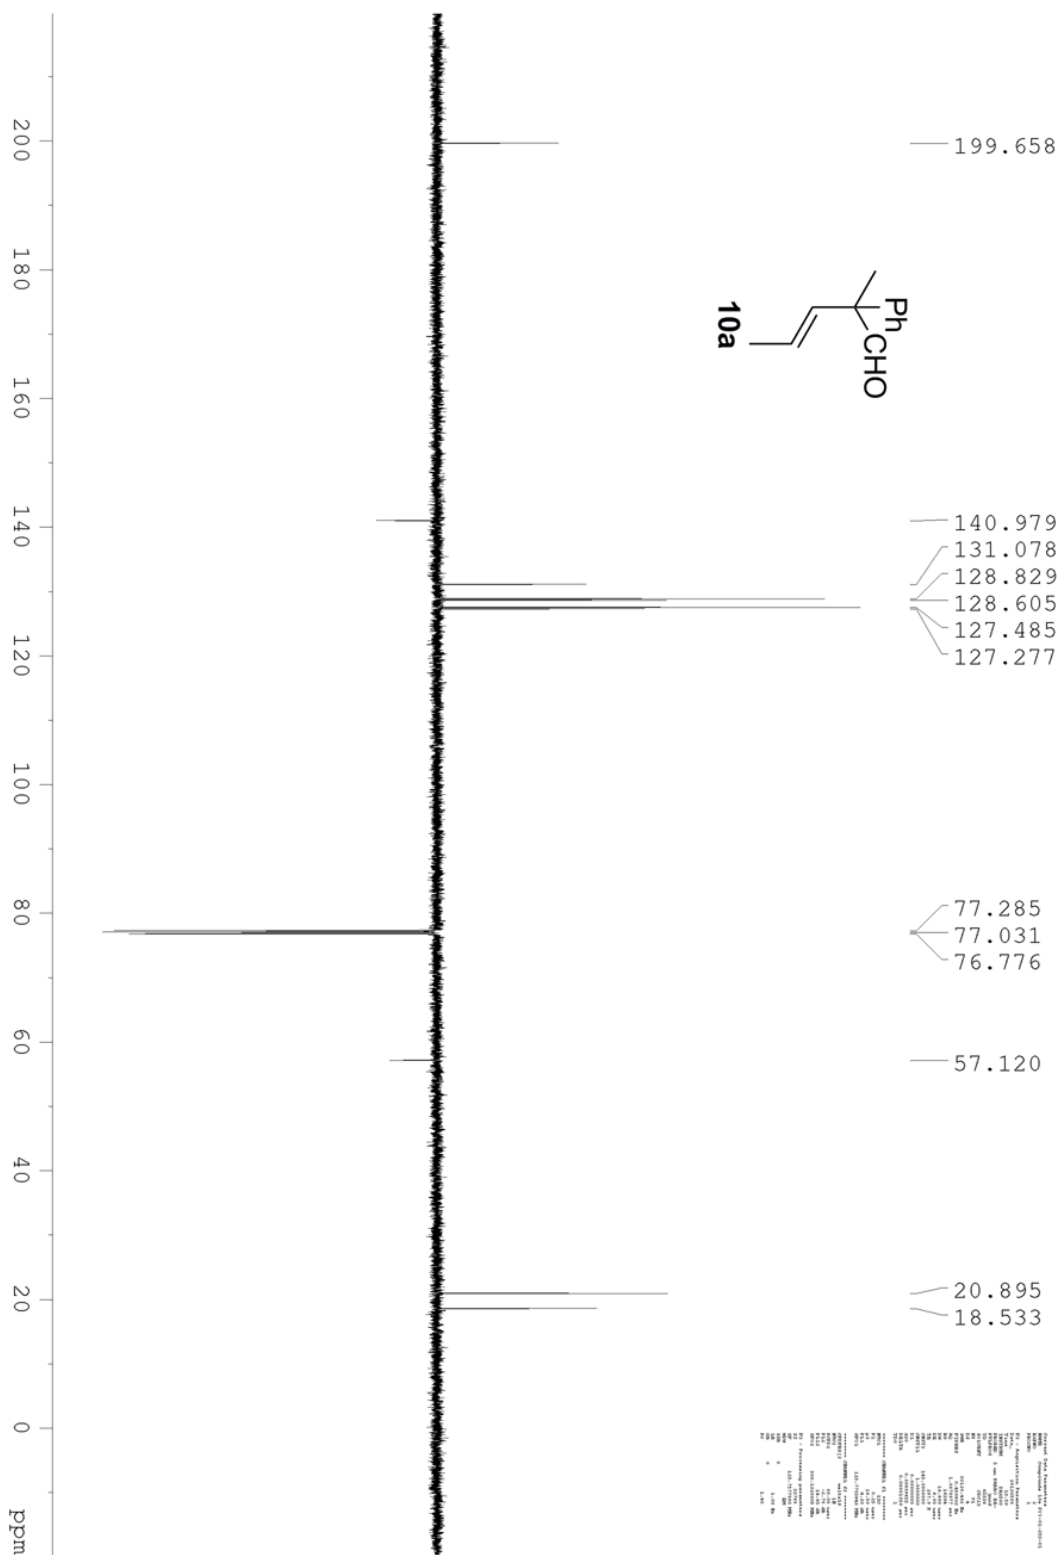

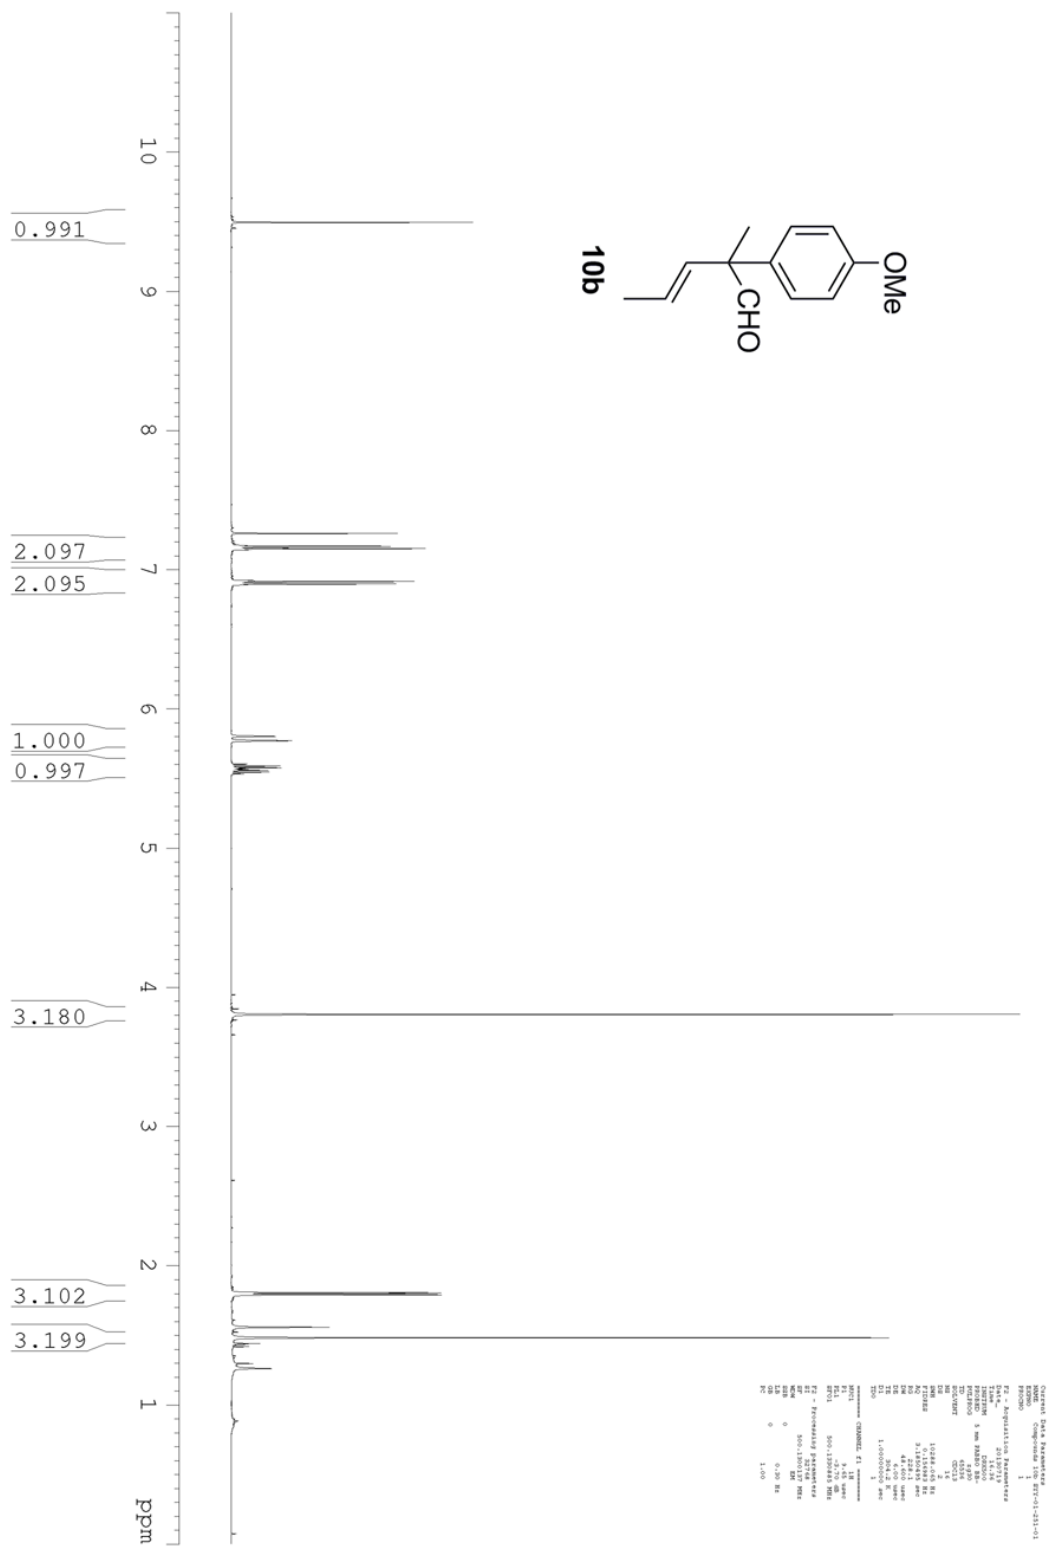

Output Data Parameters  
 =====  
 Name: 10b  
 Date: 2018-11-14  
 Time: 09:41:47  
 Instrument: spect  
 Processor: 5 mm hsqddv30  
 F2 - Acquisition Parameters  
 Date\_Time: 20181114\_094147  
 Folder: 10b  
 File: 10b.f2  
 F2 - Processing parameters  
 Date\_Time: 20181114\_094147  
 Folder: 10b  
 File: 10b.f2  
 =====  
 1D - Processing parameters  
 Date\_Time: 20181114\_094147  
 Folder: 10b  
 File: 10b.f2  
 =====  
 1D - Acquisition Parameters  
 Date\_Time: 20181114\_094147  
 Folder: 10b  
 File: 10b.f2  
 =====  
 1D - Processing parameters  
 Date\_Time: 20181114\_094147  
 Folder: 10b  
 File: 10b.f2  
 =====  
 1D - Acquisition Parameters  
 Date\_Time: 20181114\_094147  
 Folder: 10b  
 File: 10b.f2  
 =====

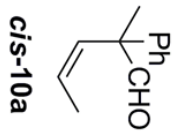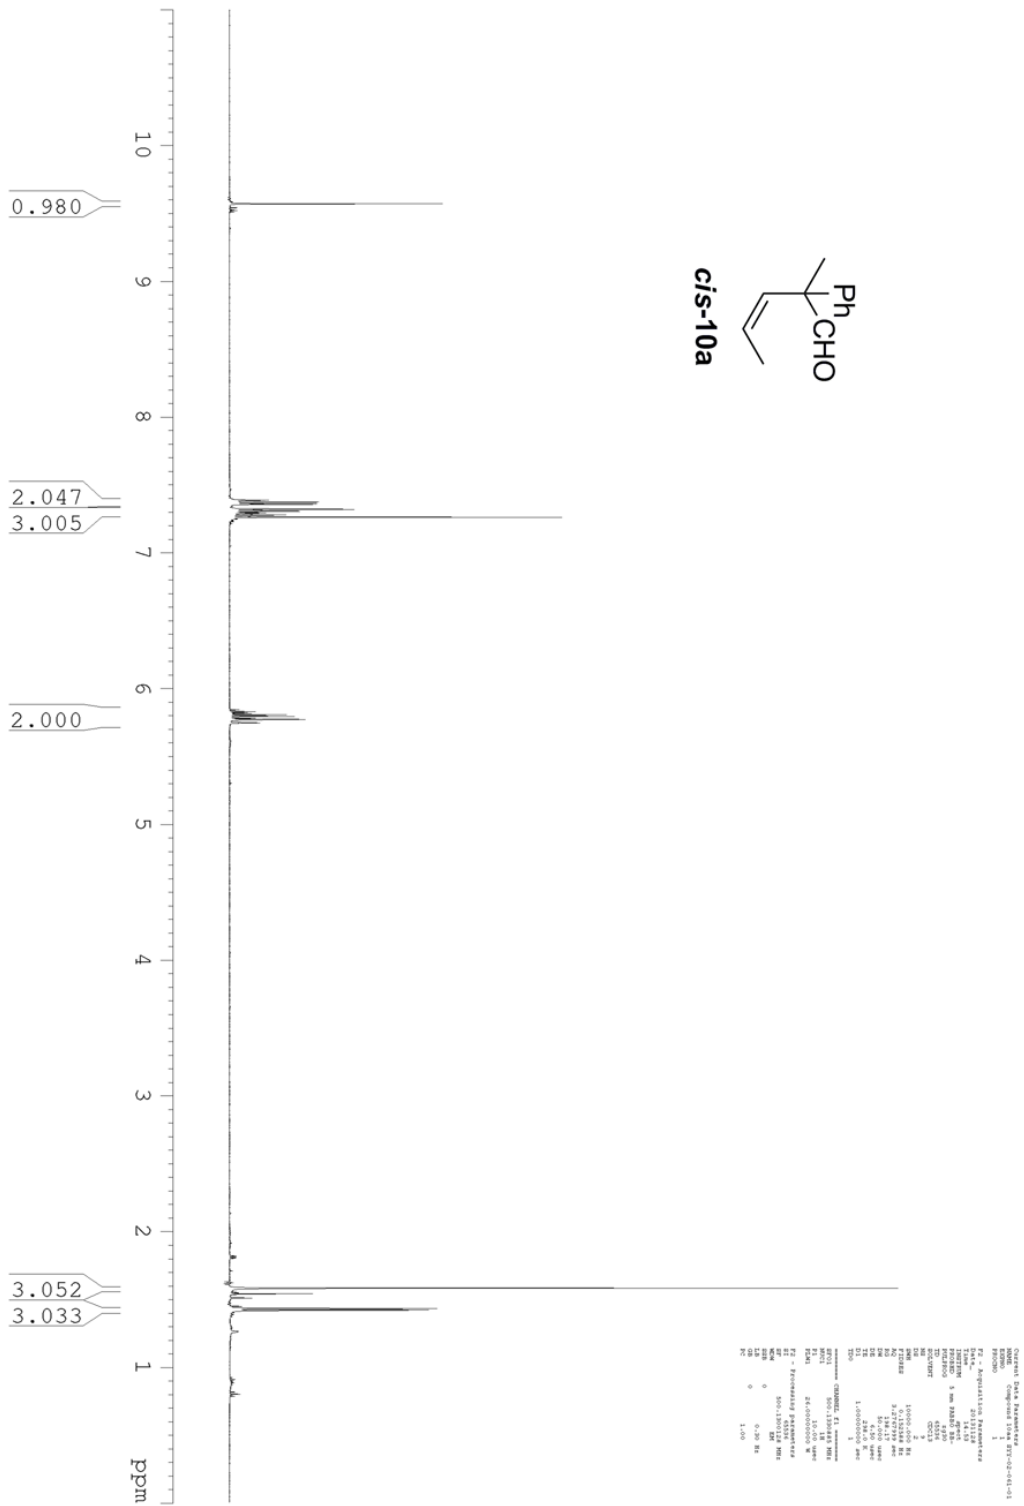

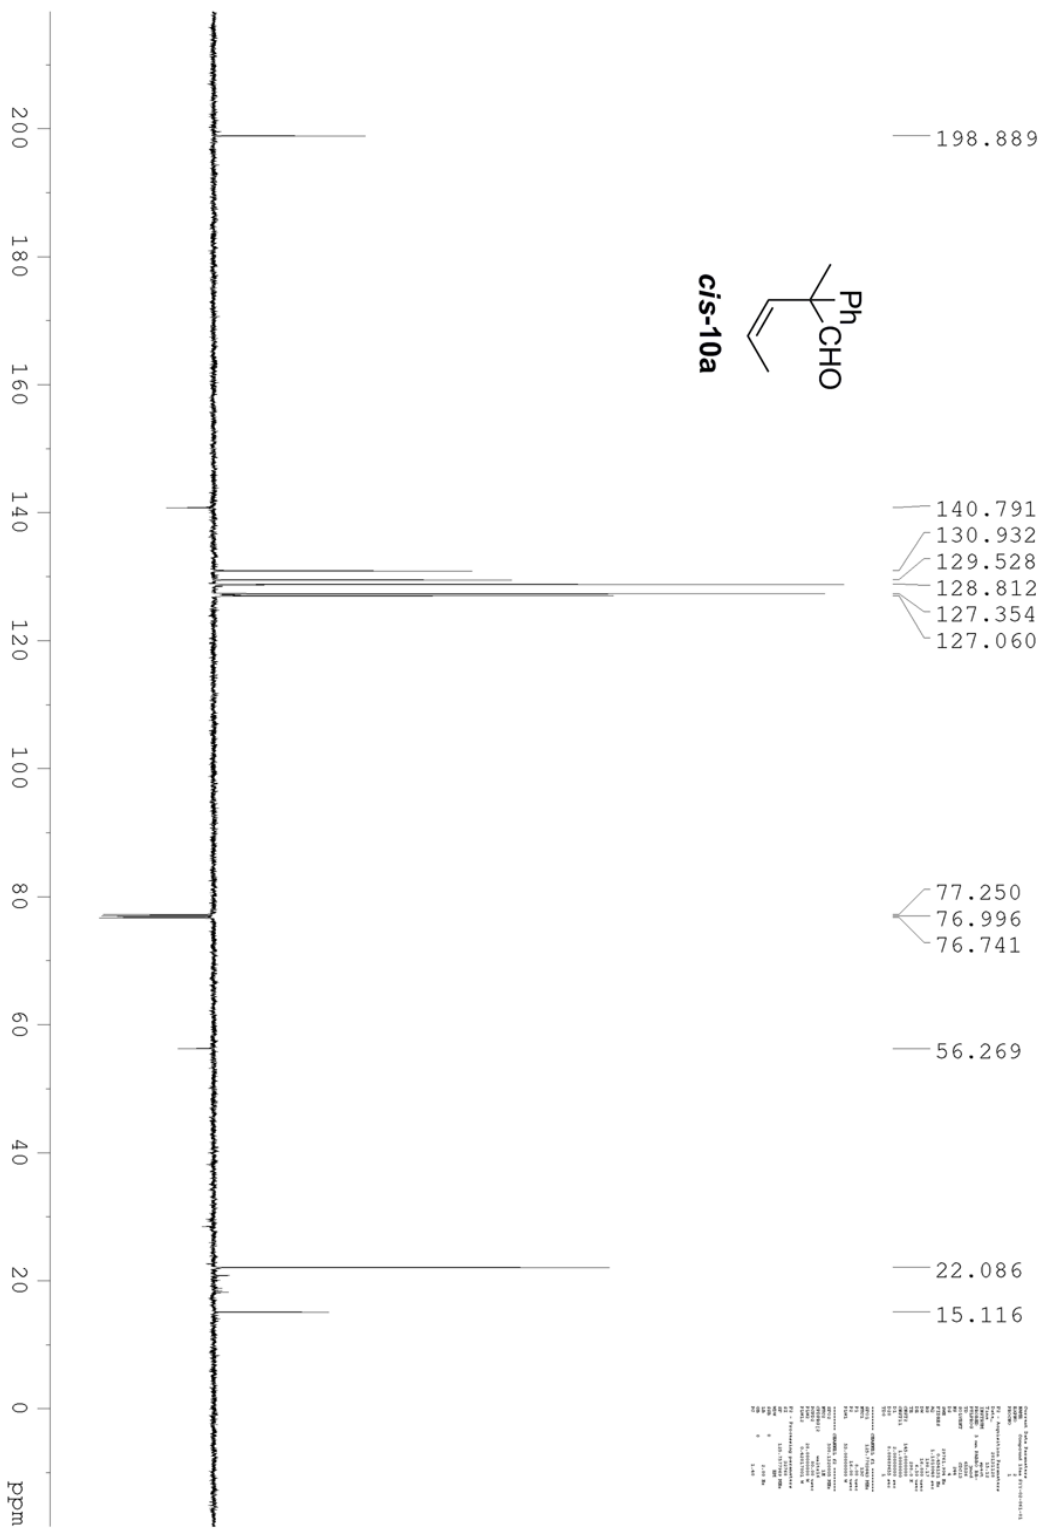

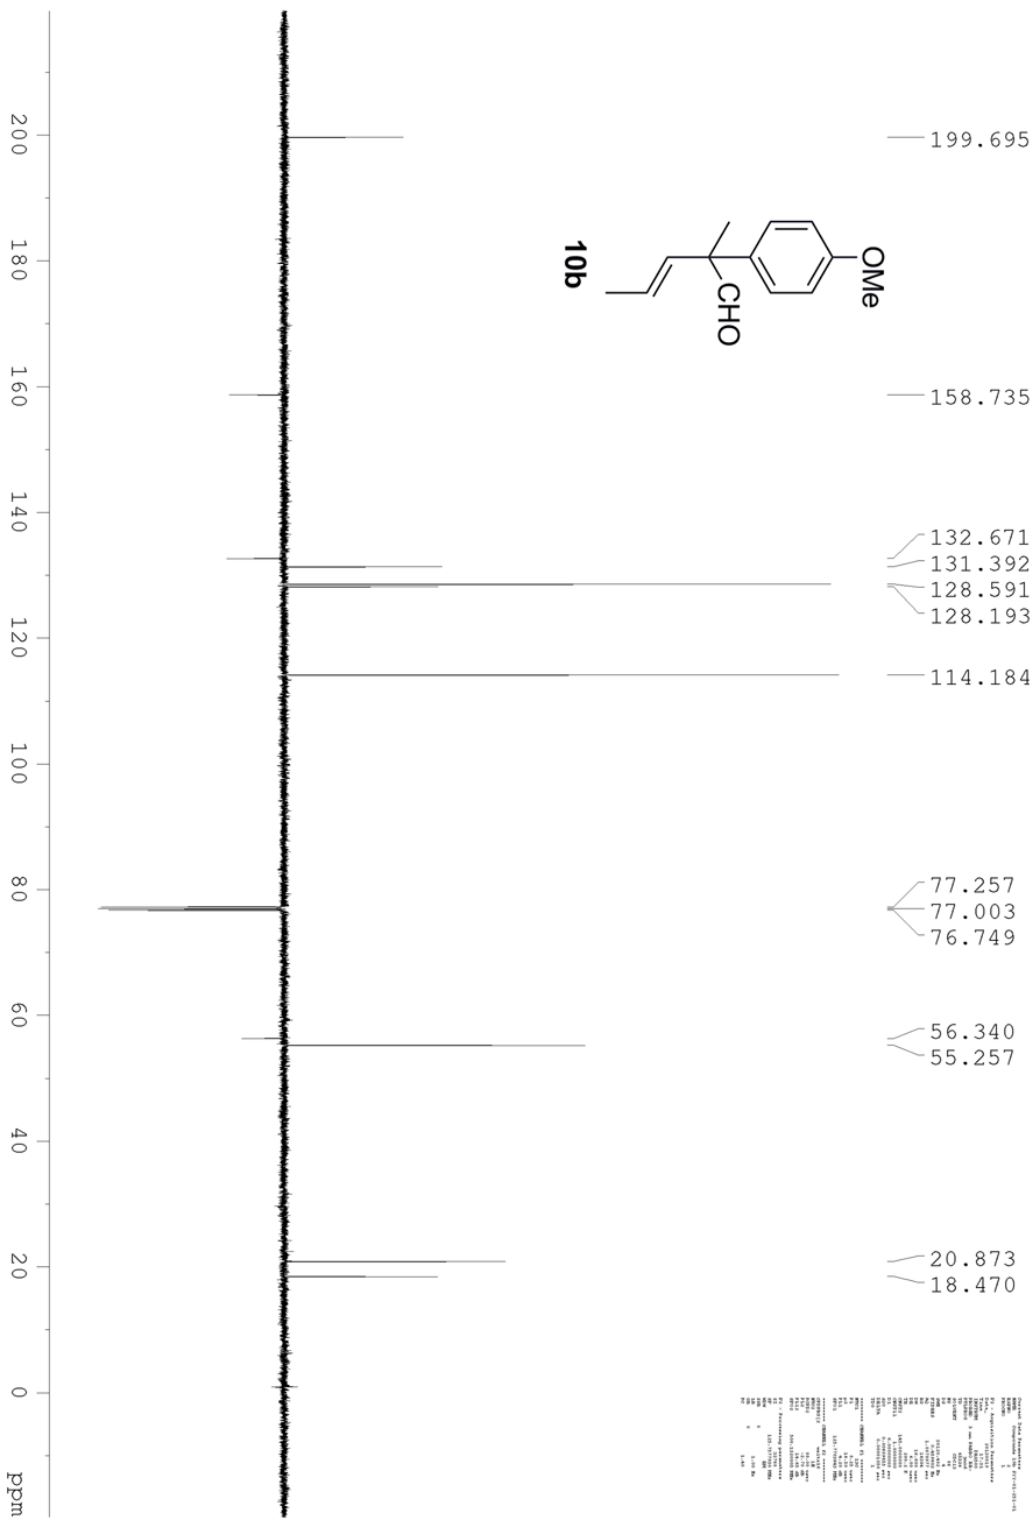

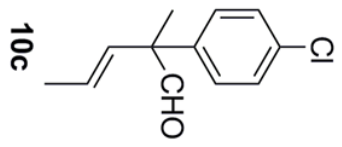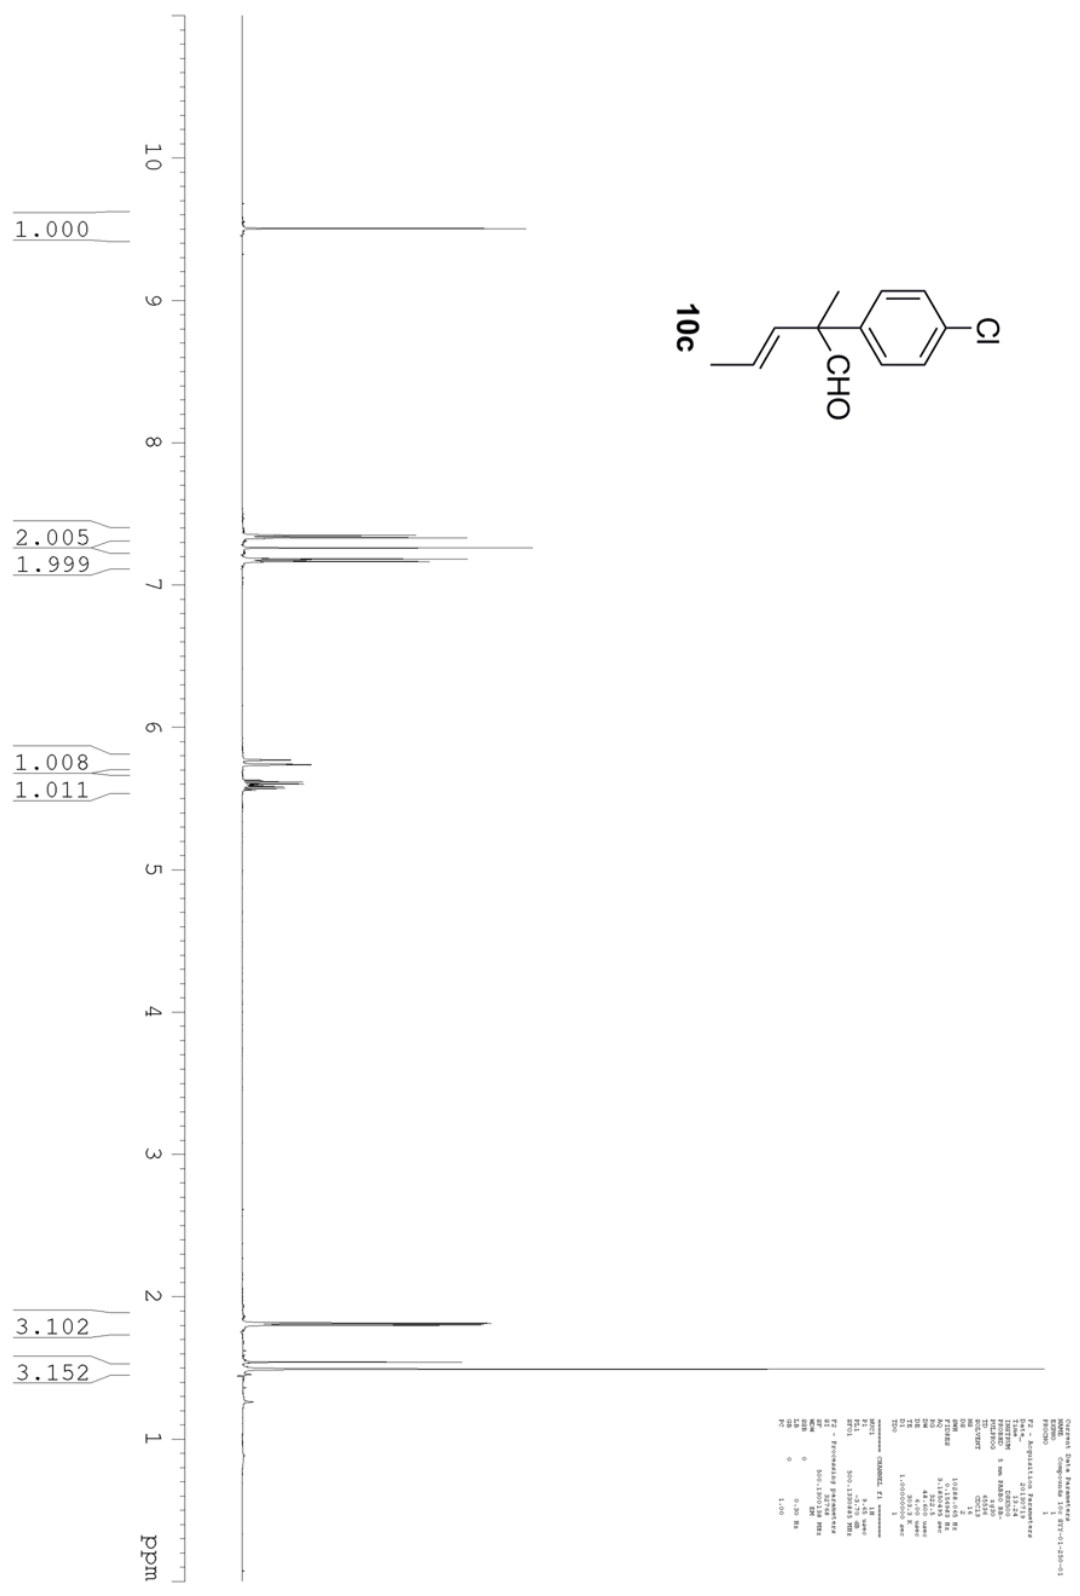

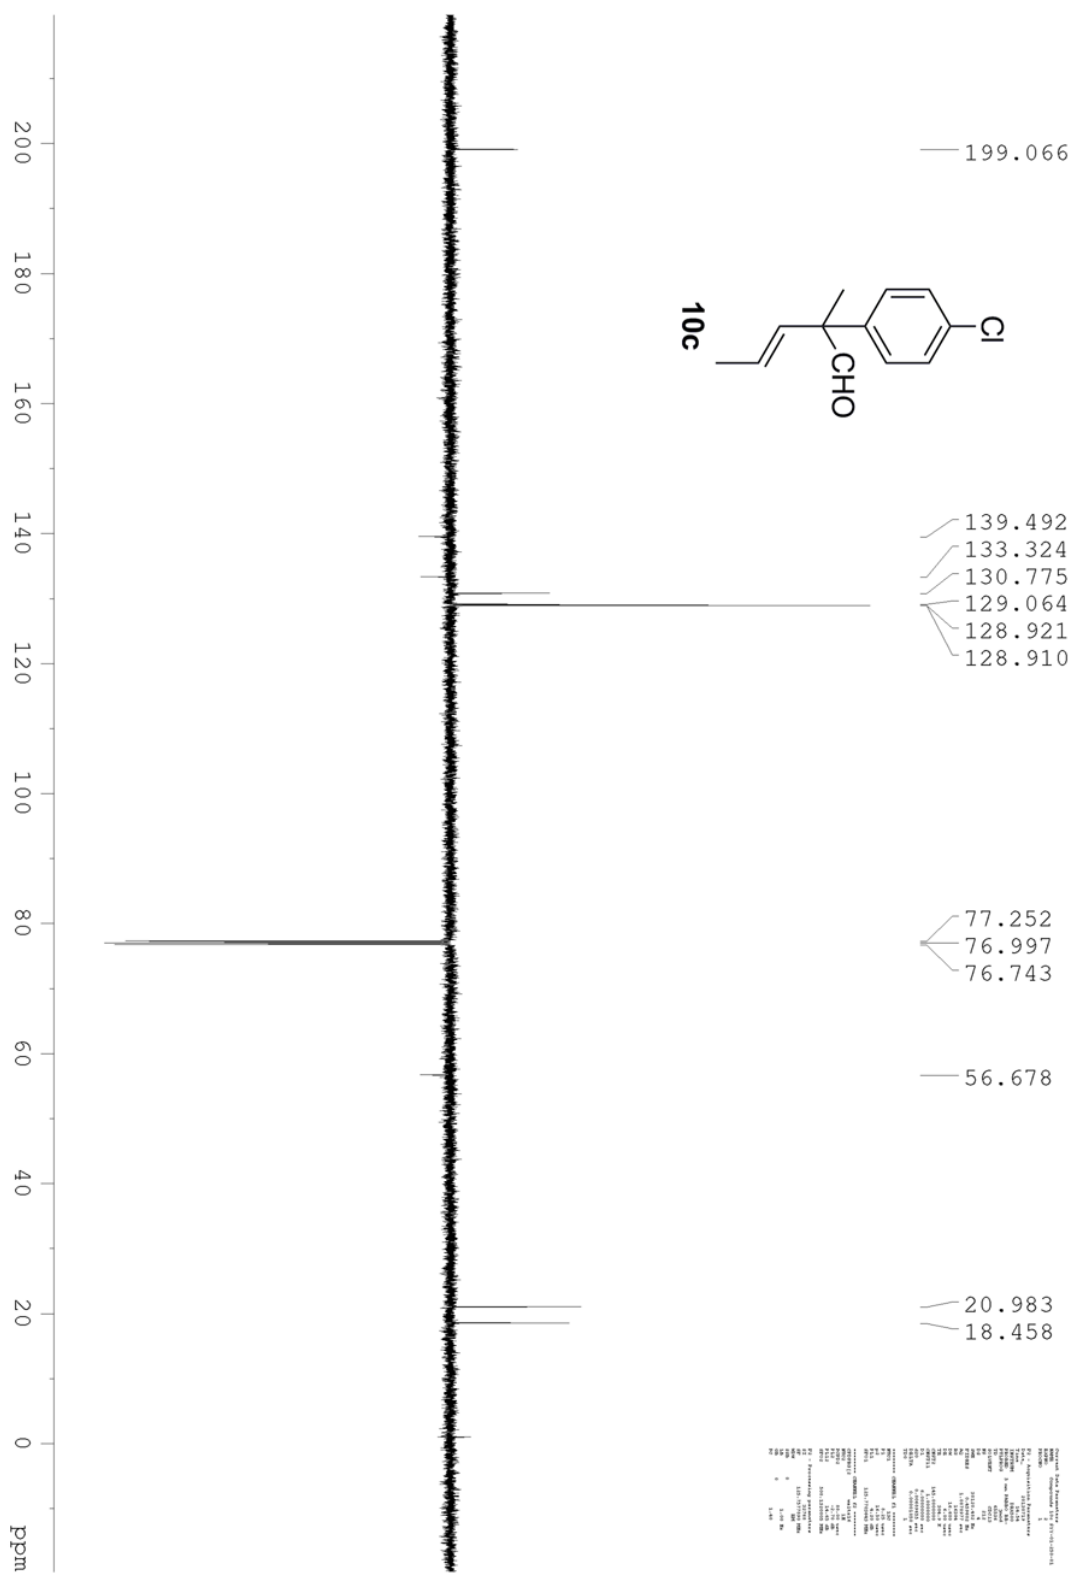

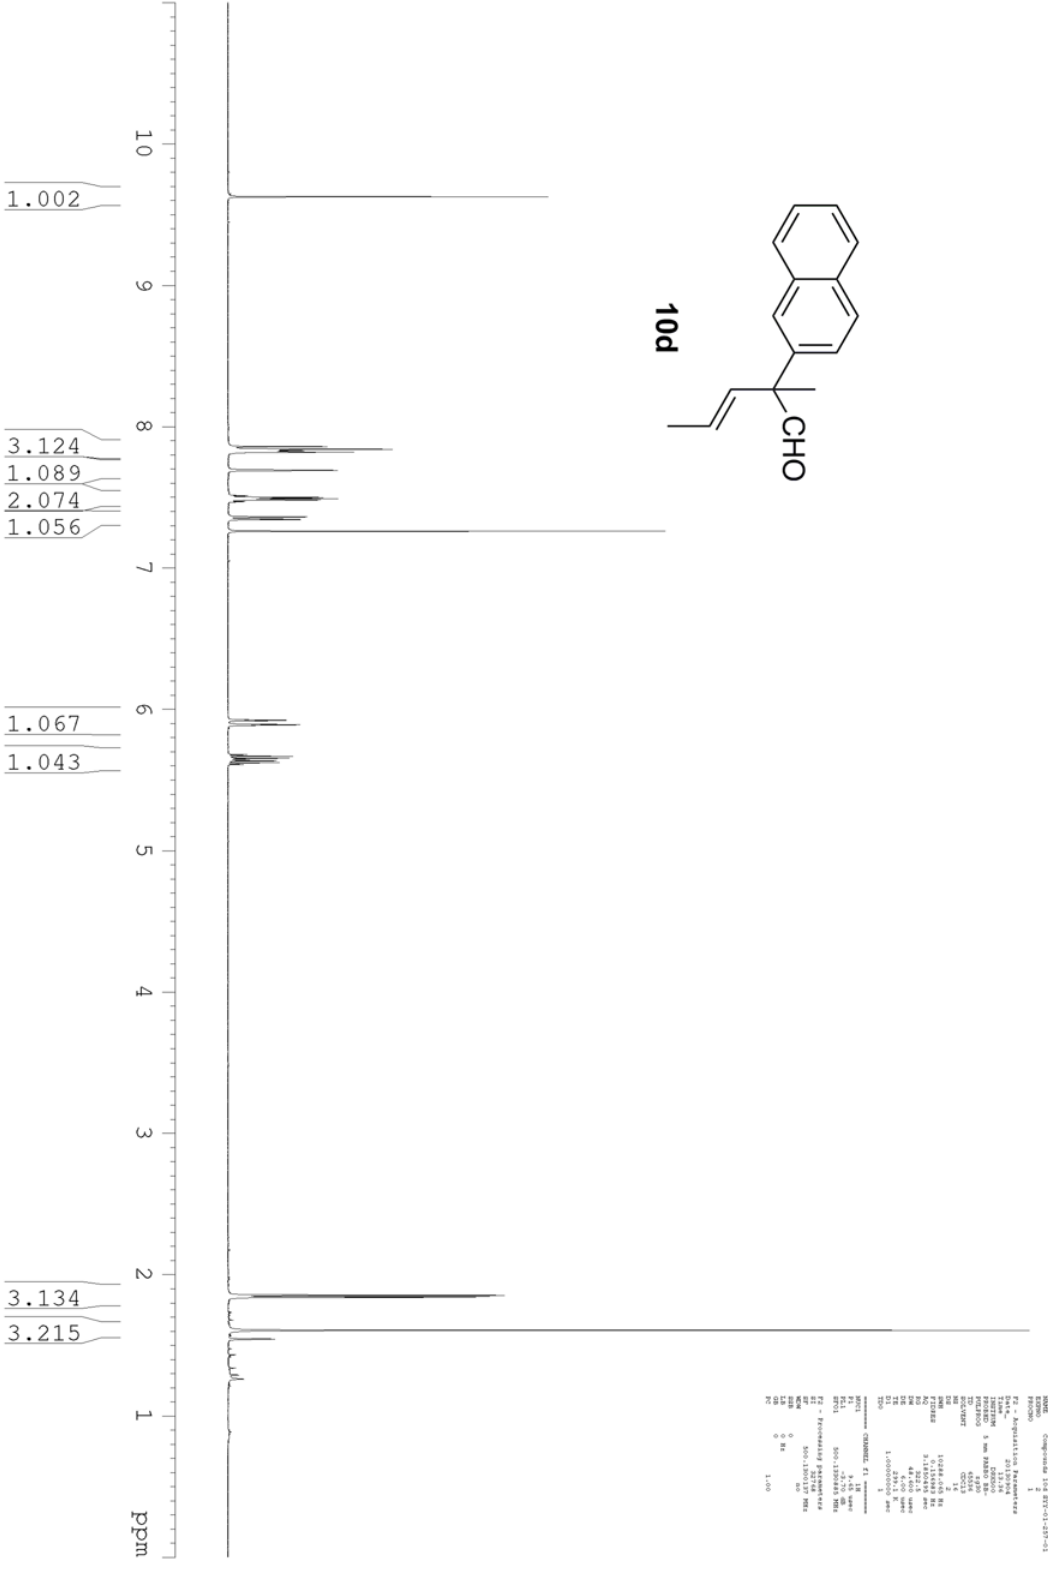

Name: 10d  
 Formula: C<sub>13</sub>H<sub>14</sub>O  
 MW: 190.25  
 SMILES: CC(C)C=Cc1ccc2ccccc2c1C=O  
 Date: 20110124  
 Time: 11:16:06  
 File: 10d\_127178  
 F2 - Acquisition Parameters  
 PROBHD: 5 mm BBO-75-2  
 PULPROG: zgpg30  
 TD: 65536  
 FIDRES: 0.16  
 AQ: 0.18000000  
 RG: 327.50  
 DATA: 1024.00000000  
 F2 - Processing parameters  
 SI: 32768  
 SF: 500.137761 MHz  
 DS: 4  
 AS: 32768  
 CM: 1.00000000  
 GB: 0 Hz  
 PC: 1.00



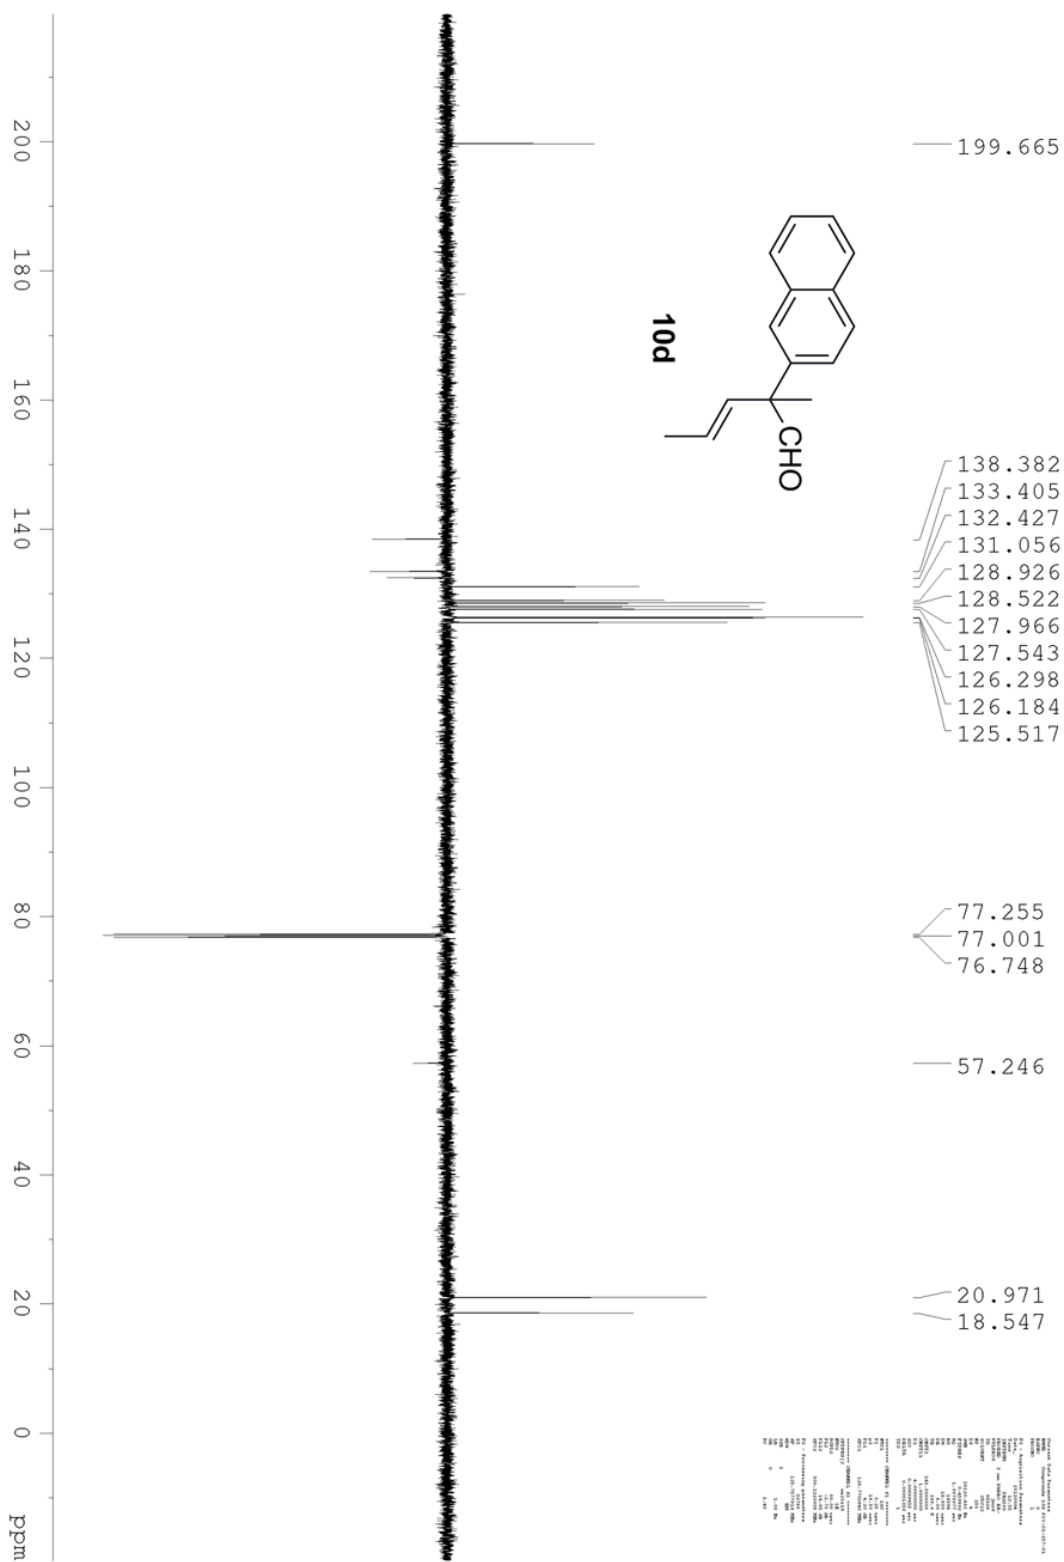

13C NMR (101 MHz, CDCl<sub>3</sub>) spectrum of 10d. The spectrum shows a triplet for the solvent at 77.001 ppm. The carbonyl carbon is at 199.665 ppm. The aromatic and alkene carbons are clustered between 125.5 and 138.4 ppm. Two aliphatic carbons are at 20.971 and 18.547 ppm. Integration values are shown below the peaks.

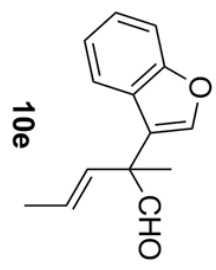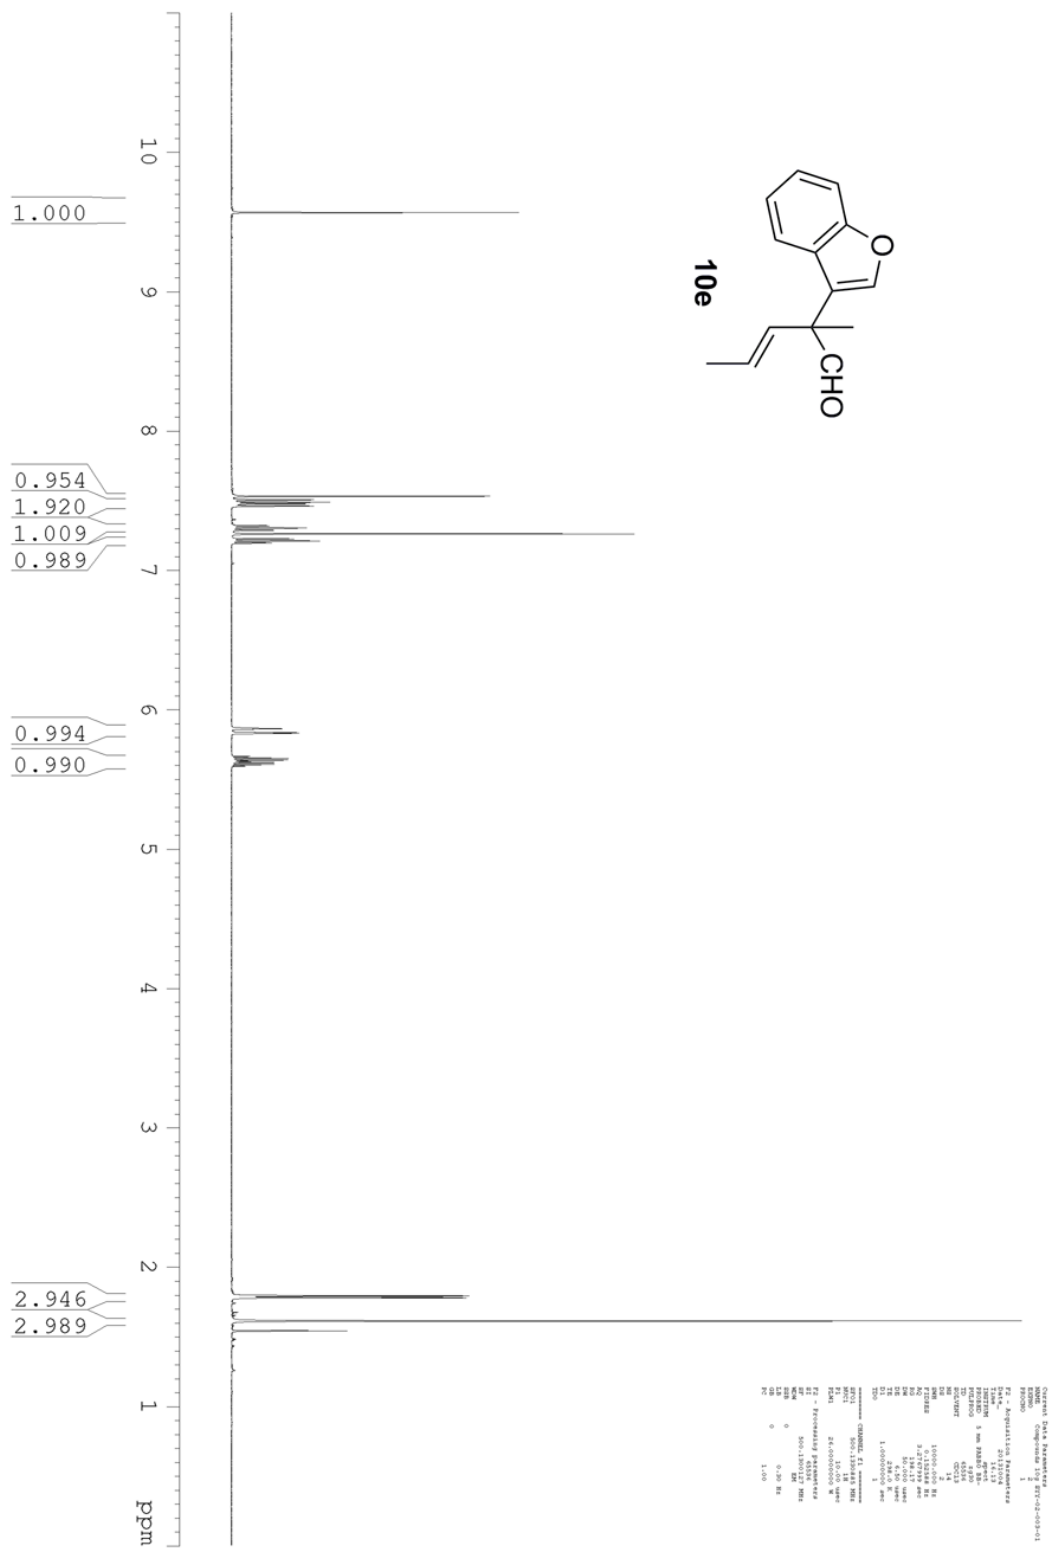

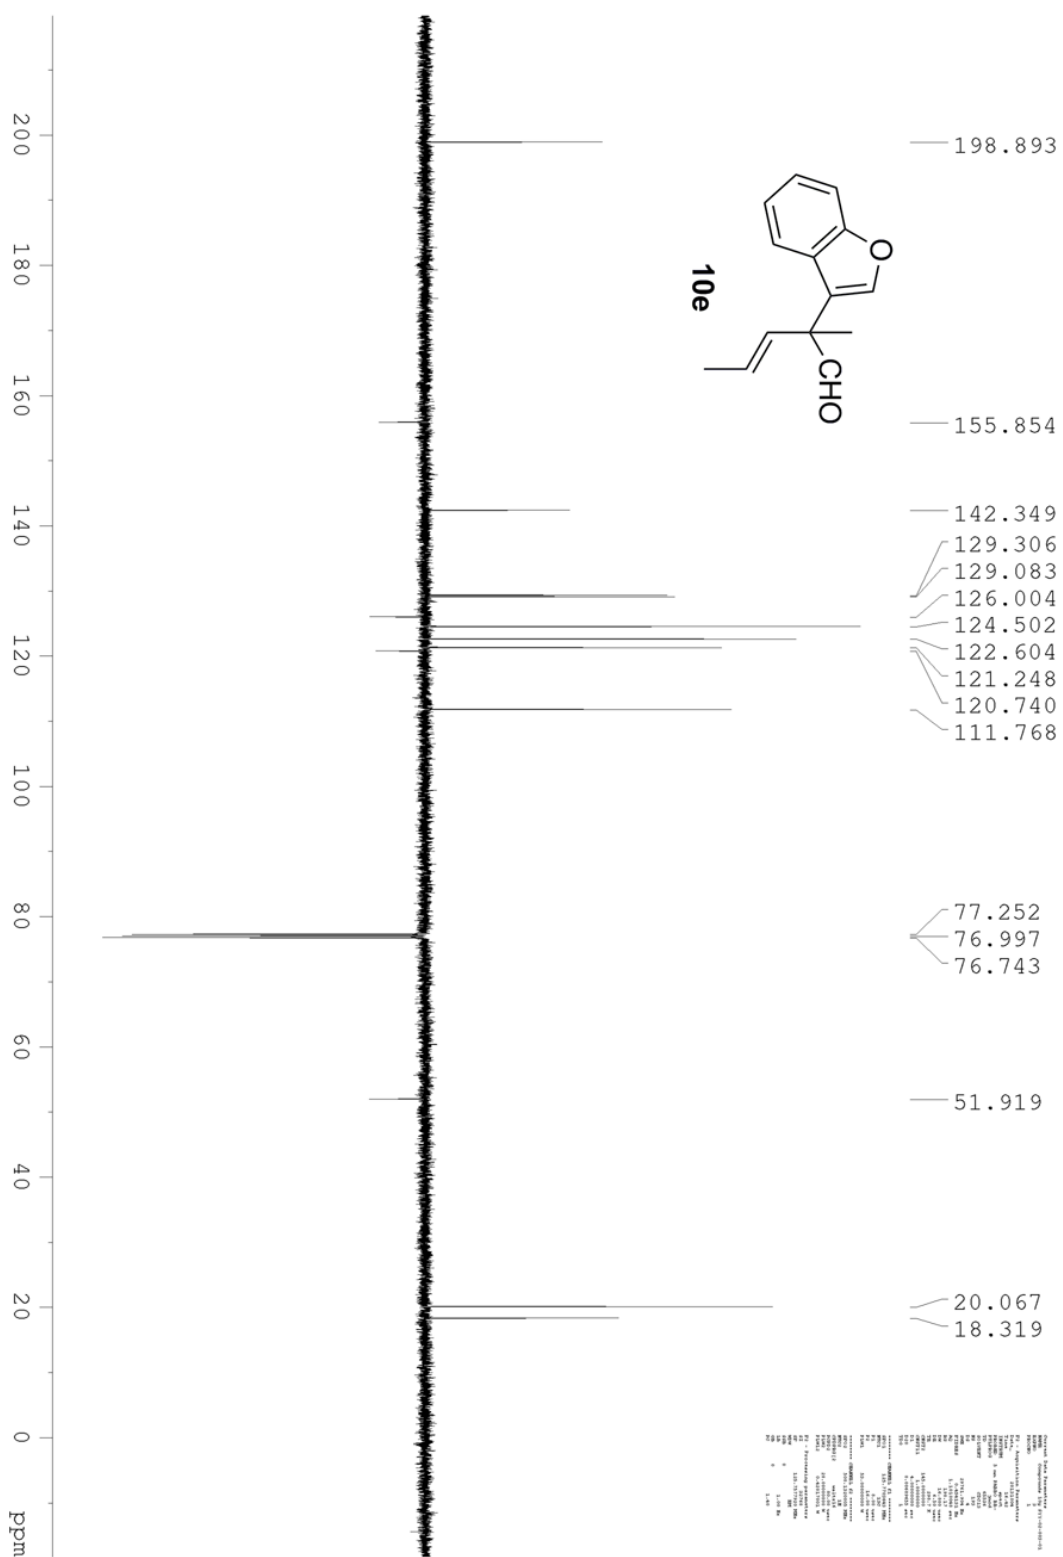



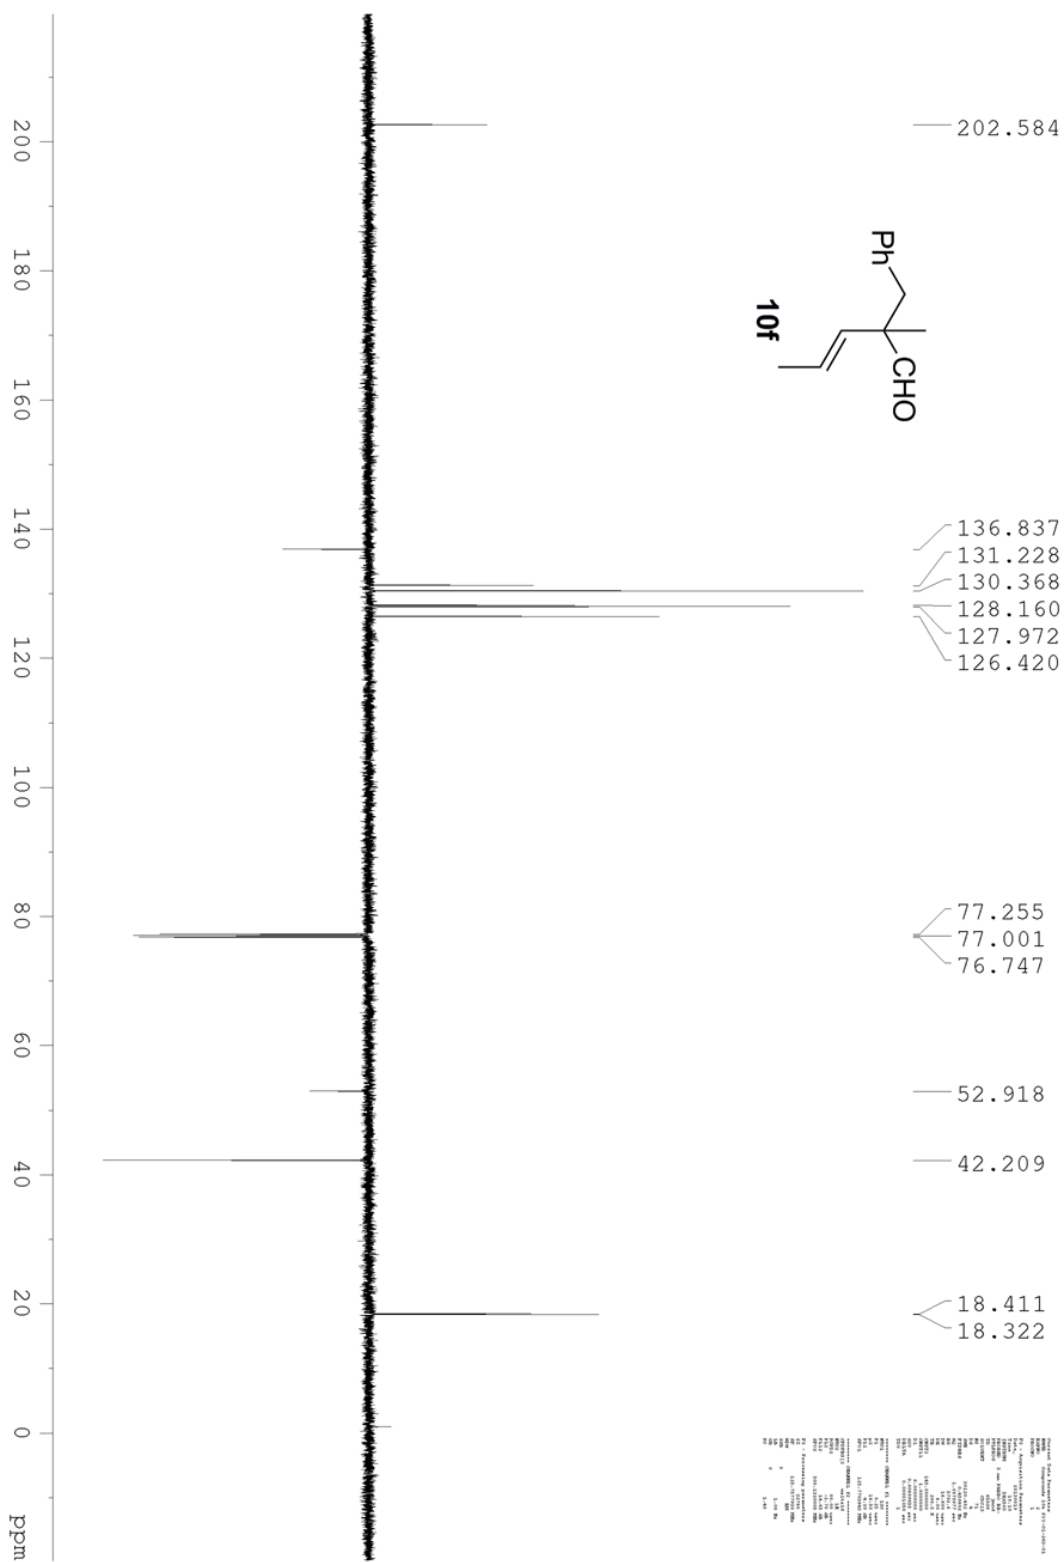

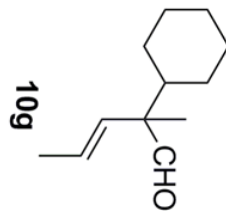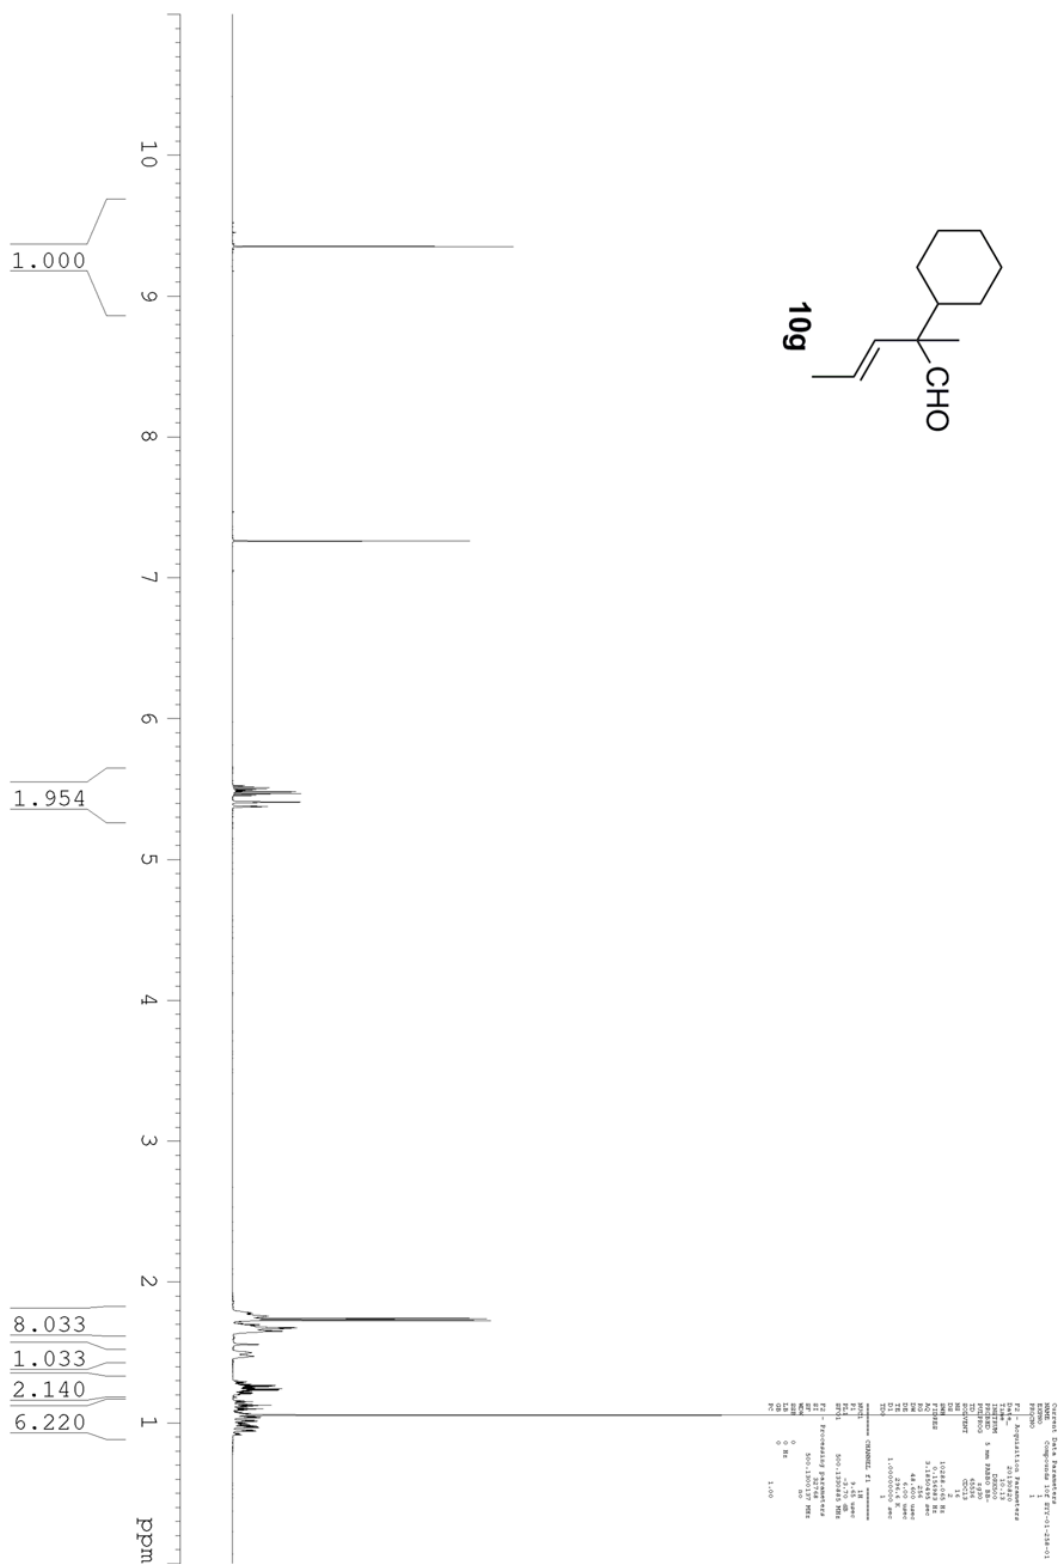

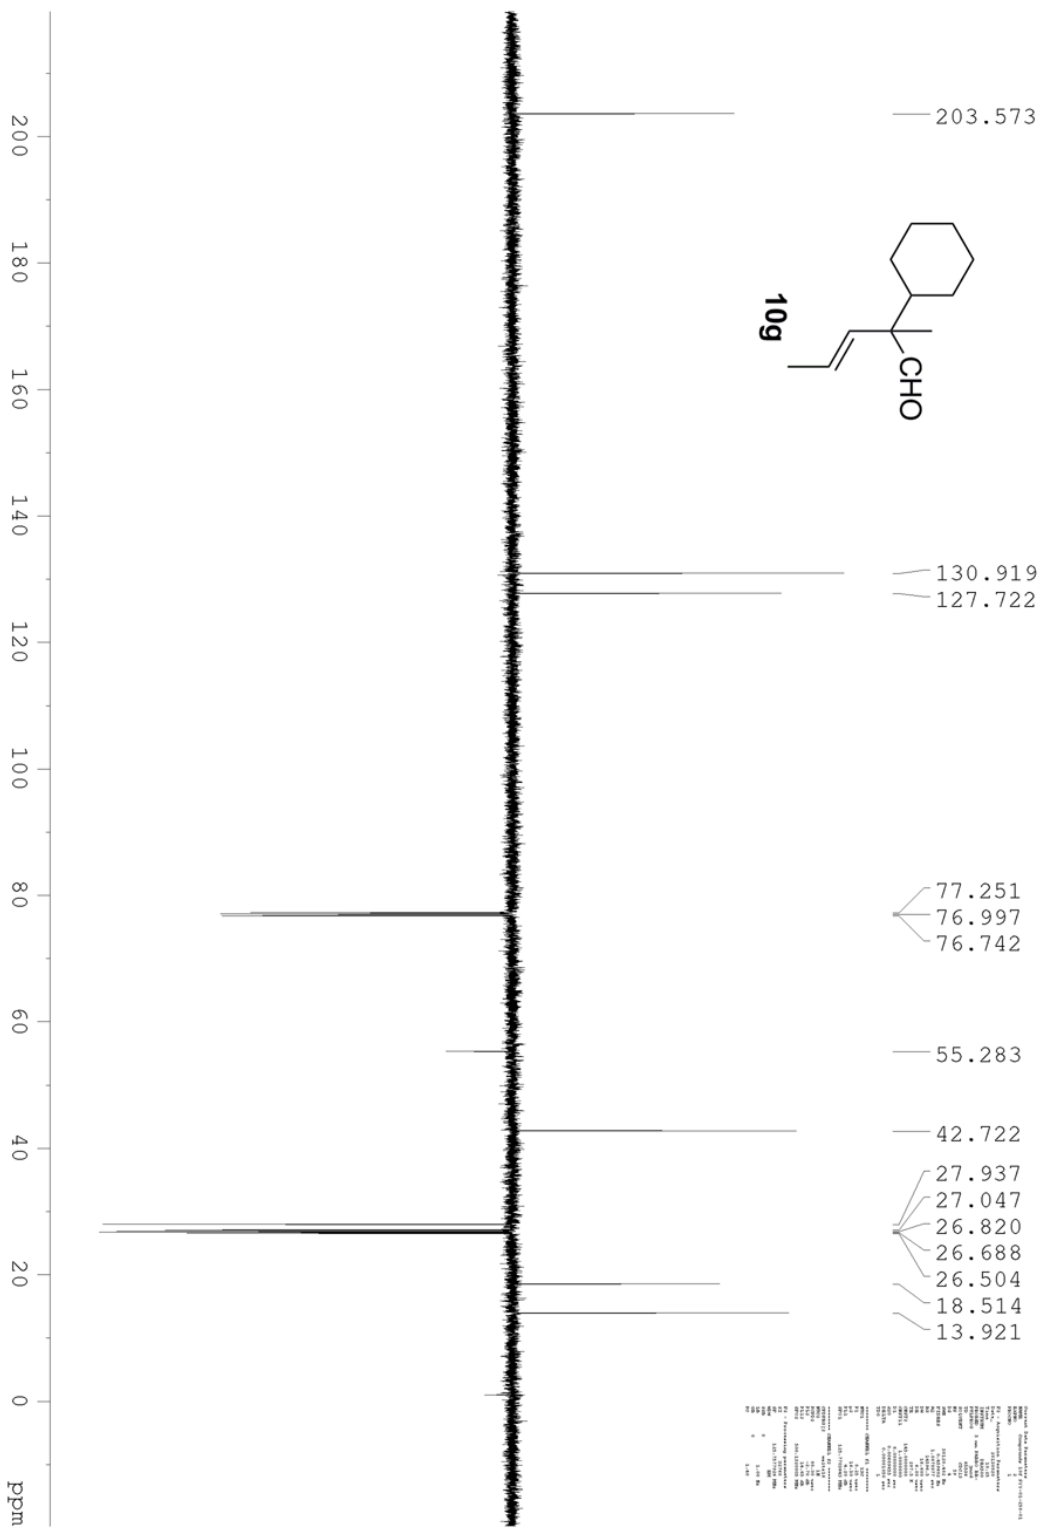

```

NAME: 10g
EXPNO: 2
PROCNO: 1
PROCAM: 1
AQ: 0.185634
RG: 327.50
RG2: 327.50
RG3: 327.50
AQ2: 0.185634
AQ3: 0.185634
SFO: 125.760343
SI: 32750
SF: 15720.042888
WDW: EM
SSB: 0
LB: 3.000000
GB: 0
PC: 0.000000
SC: 0
RC: 0.000000
IC: 0.000000
TC: 0.000000
EC: 0.000000
FC: 0.000000
DC: 0.000000
OC: 0.000000
XC: 0.000000
YC: 0.000000
ZC: 0.000000
PC2: 0.000000
PC3: 0.000000
PC4: 0.000000
PC5: 0.000000
PC6: 0.000000
PC7: 0.000000
PC8: 0.000000
PC9: 0.000000
PC10: 0.000000
PC11: 0.000000
PC12: 0.000000
PC13: 0.000000
PC14: 0.000000
PC15: 0.000000
PC16: 0.000000
PC17: 0.000000
PC18: 0.000000
PC19: 0.000000
PC20: 0.000000
PC21: 0.000000
PC22: 0.000000
PC23: 0.000000
PC24: 0.000000
PC25: 0.000000
PC26: 0.000000
PC27: 0.000000
PC28: 0.000000
PC29: 0.000000
PC30: 0.000000
PC31: 0.000000
PC32: 0.000000
PC33: 0.000000
PC34: 0.000000
PC35: 0.000000
PC36: 0.000000
PC37: 0.000000
PC38: 0.000000
PC39: 0.000000
PC40: 0.000000
PC41: 0.000000
PC42: 0.000000
PC43: 0.000000
PC44: 0.000000
PC45: 0.000000
PC46: 0.000000
PC47: 0.000000
PC48: 0.000000
PC49: 0.000000
PC50: 0.000000
PC51: 0.000000
PC52: 0.000000
PC53: 0.000000
PC54: 0.000000
PC55: 0.000000
PC56: 0.000000
PC57: 0.000000
PC58: 0.000000
PC59: 0.000000
PC60: 0.000000
PC61: 0.000000
PC62: 0.000000
PC63: 0.000000
PC64: 0.000000
PC65: 0.000000
PC66: 0.000000
PC67: 0.000000
PC68: 0.000000
PC69: 0.000000
PC70: 0.000000
PC71: 0.000000
PC72: 0.000000
PC73: 0.000000
PC74: 0.000000
PC75: 0.000000
PC76: 0.000000
PC77: 0.000000
PC78: 0.000000
PC79: 0.000000
PC80: 0.000000
PC81: 0.000000
PC82: 0.000000
PC83: 0.000000
PC84: 0.000000
PC85: 0.000000
PC86: 0.000000
PC87: 0.000000
PC88: 0.000000
PC89: 0.000000
PC90: 0.000000
PC91: 0.000000
PC92: 0.000000
PC93: 0.000000
PC94: 0.000000
PC95: 0.000000
PC96: 0.000000
PC97: 0.000000
PC98: 0.000000
PC99: 0.000000
PC100: 0.000000
PC101: 0.000000
PC102: 0.000000
PC103: 0.000000
PC104: 0.000000
PC105: 0.000000
PC106: 0.000000
PC107: 0.000000
PC108: 0.000000
PC109: 0.000000
PC110: 0.000000
PC111: 0.000000
PC112: 0.000000
PC113: 0.000000
PC114: 0.000000
PC115: 0.000000
PC116: 0.000000
PC117: 0.000000
PC118: 0.000000
PC119: 0.000000
PC120: 0.000000
PC121: 0.000000
PC122: 0.000000
PC123: 0.000000
PC124: 0.000000
PC125: 0.000000
PC126: 0.000000
PC127: 0.000000
PC128: 0.000000
PC129: 0.000000
PC130: 0.000000
PC131: 0.000000
PC132: 0.000000
PC133: 0.000000
PC134: 0.000000
PC135: 0.000000
PC136: 0.000000
PC137: 0.000000
PC138: 0.000000
PC139: 0.000000
PC140: 0.000000
PC141: 0.000000
PC142: 0.000000
PC143: 0.000000
PC144: 0.000000
PC145: 0.000000
PC146: 0.000000
PC147: 0.000000
PC148: 0.000000
PC149: 0.000000
PC150: 0.000000
PC151: 0.000000
PC152: 0.000000
PC153: 0.000000
PC154: 0.000000
PC155: 0.000000
PC156: 0.000000
PC157: 0.000000
PC158: 0.000000
PC159: 0.000000
PC160: 0.000000
PC161: 0.000000
PC162: 0.000000
PC163: 0.000000
PC164: 0.000000
PC165: 0.000000
PC166: 0.000000
PC167: 0.000000
PC168: 0.000000
PC169: 0.000000
PC170: 0.000000
PC171: 0.000000
PC172: 0.000000
PC173: 0.000000
PC174: 0.000000
PC175: 0.000000
PC176: 0.000000
PC177: 0.000000
PC178: 0.000000
PC179: 0.000000
PC180: 0.000000
PC181: 0.000000
PC182: 0.000000
PC183: 0.000000
PC184: 0.000000
PC185: 0.000000
PC186: 0.000000
PC187: 0.000000
PC188: 0.000000
PC189: 0.000000
PC190: 0.000000
PC191: 0.000000
PC192: 0.000000
PC193: 0.000000
PC194: 0.000000
PC195: 0.000000
PC196: 0.000000
PC197: 0.000000
PC198: 0.000000
PC199: 0.000000
PC200: 0.000000

```





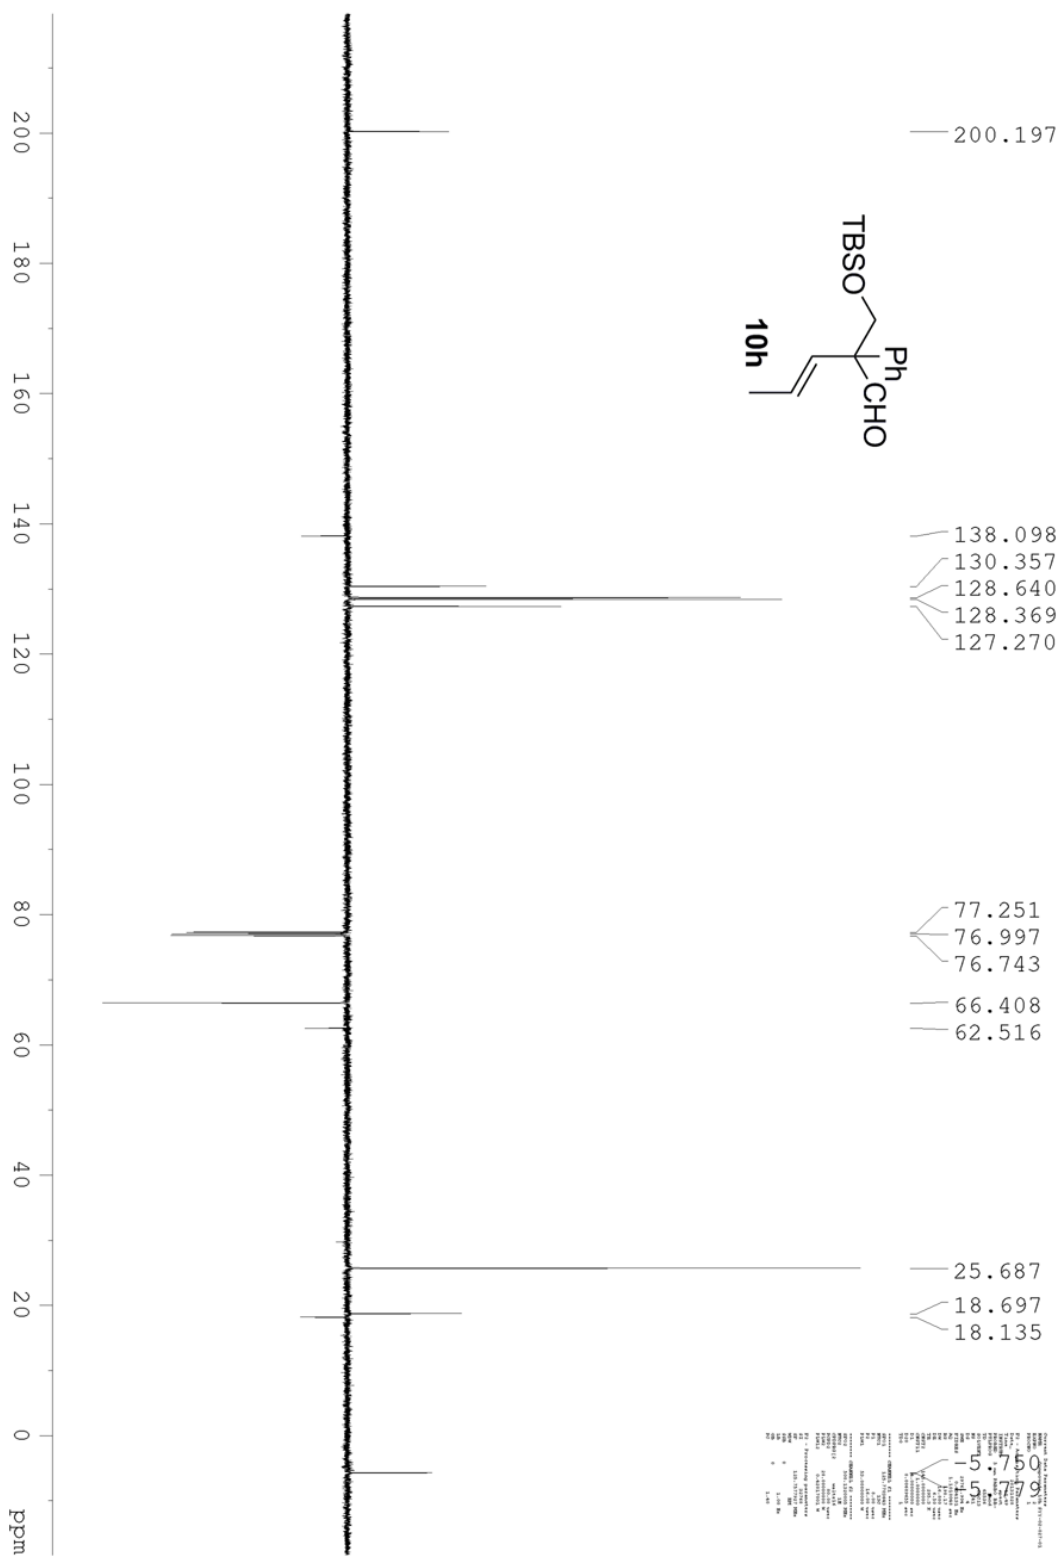

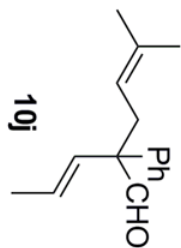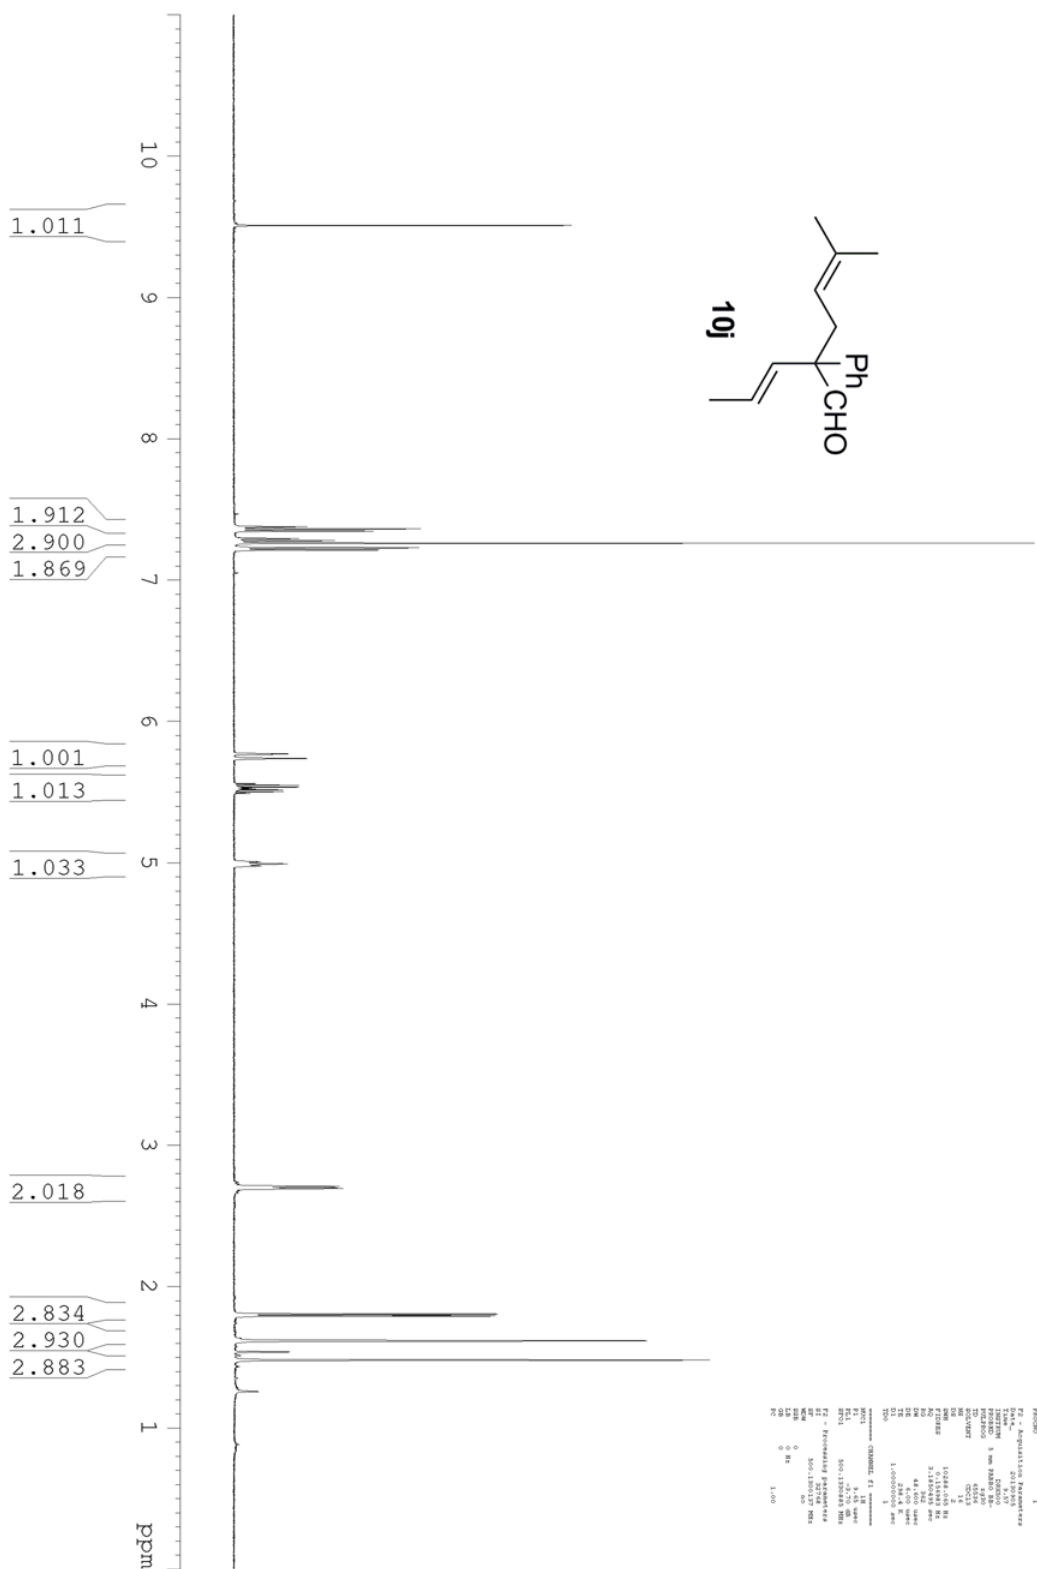

Name: 10j  
 Formula: C<sub>16</sub>H<sub>18</sub>O  
 MW: 222.32  
 SMILES: CC=CC(=C)C(=O)C1=CC=CC=C1C=C/C=C/C=C1C=CC=C1

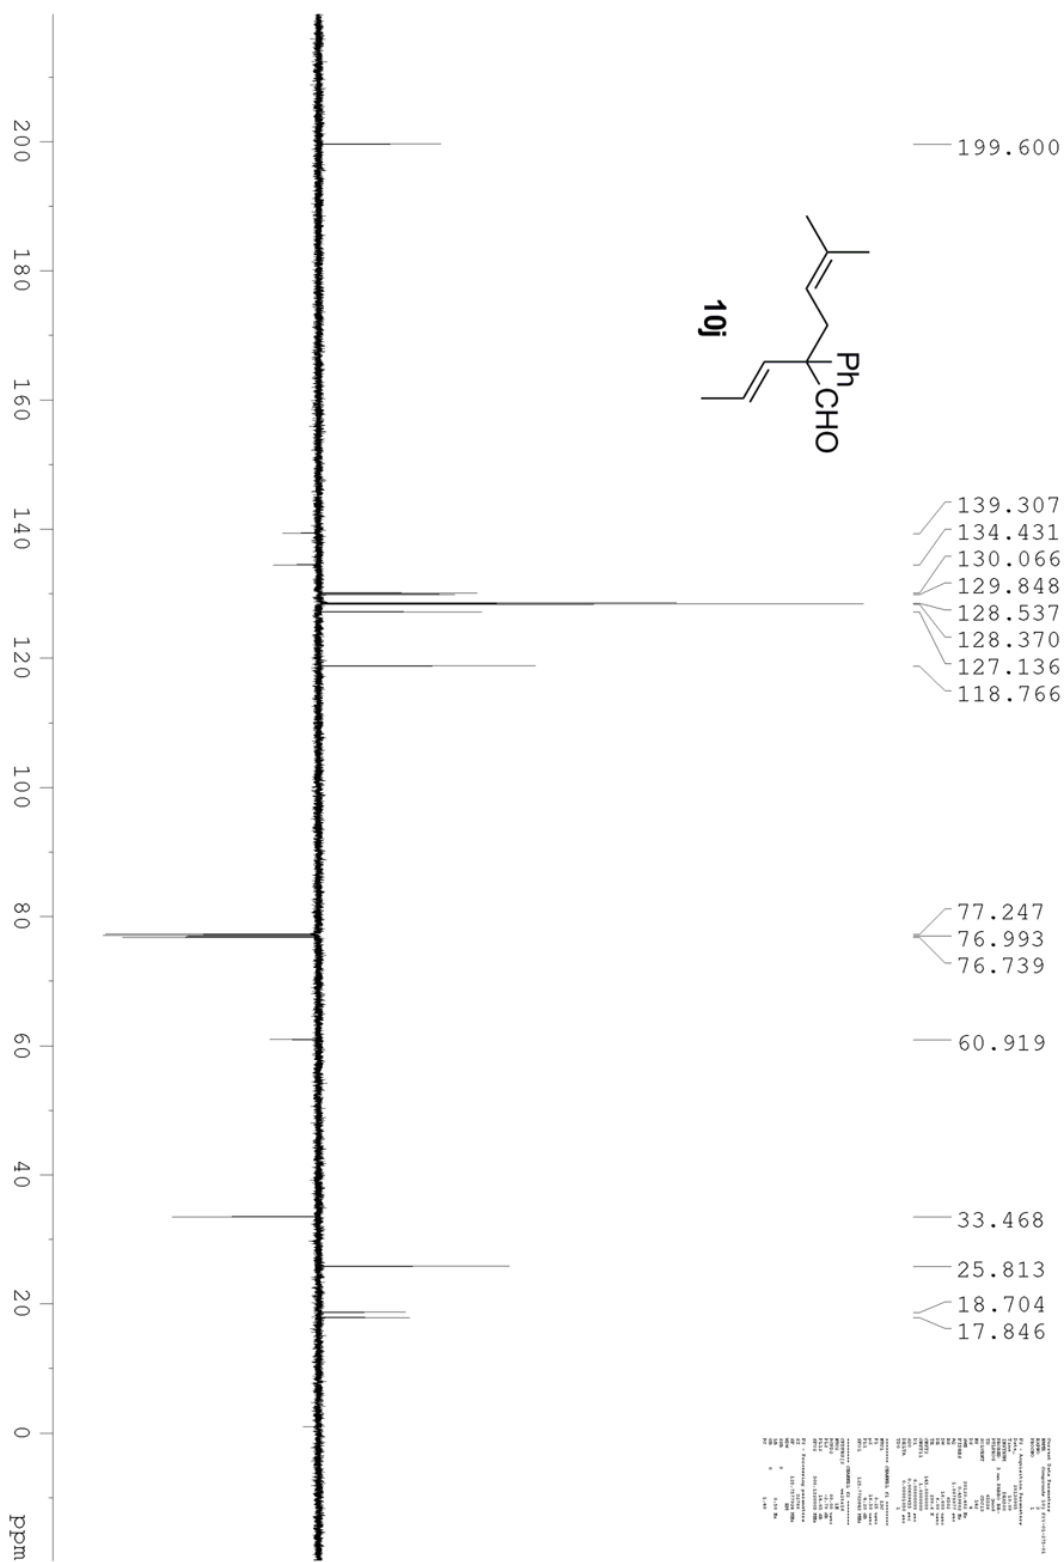

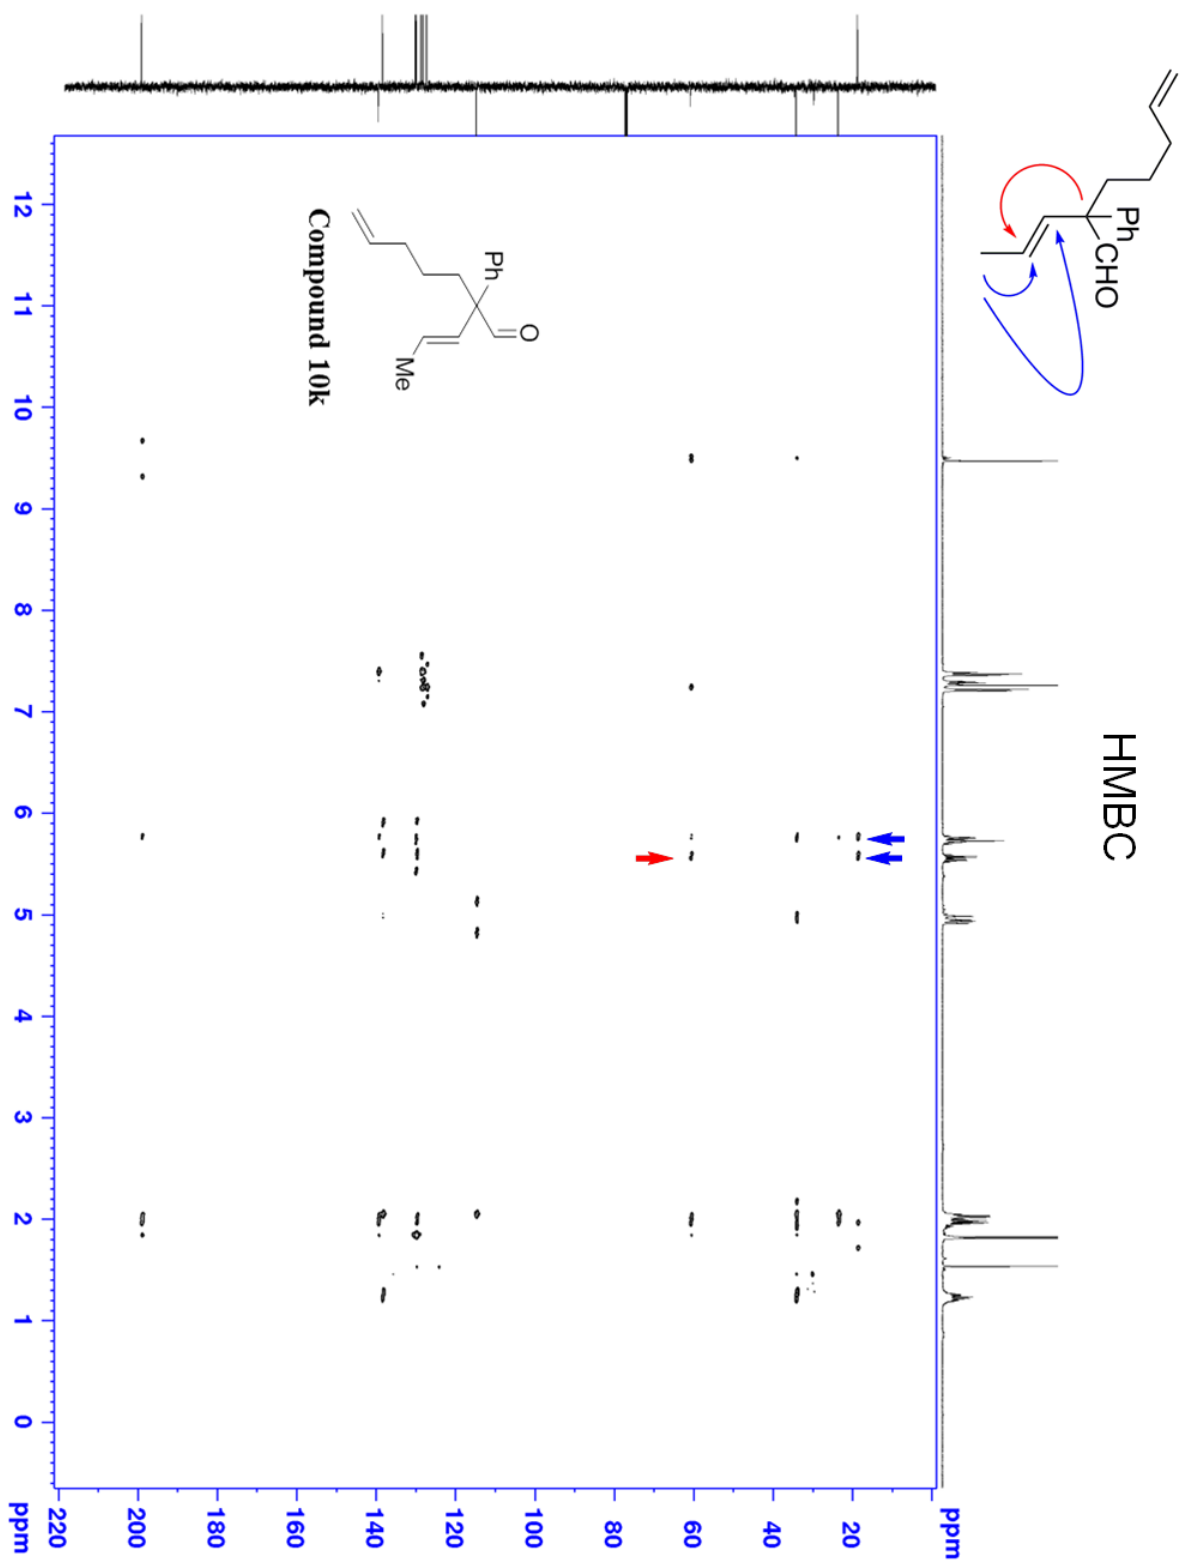

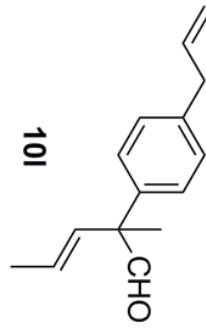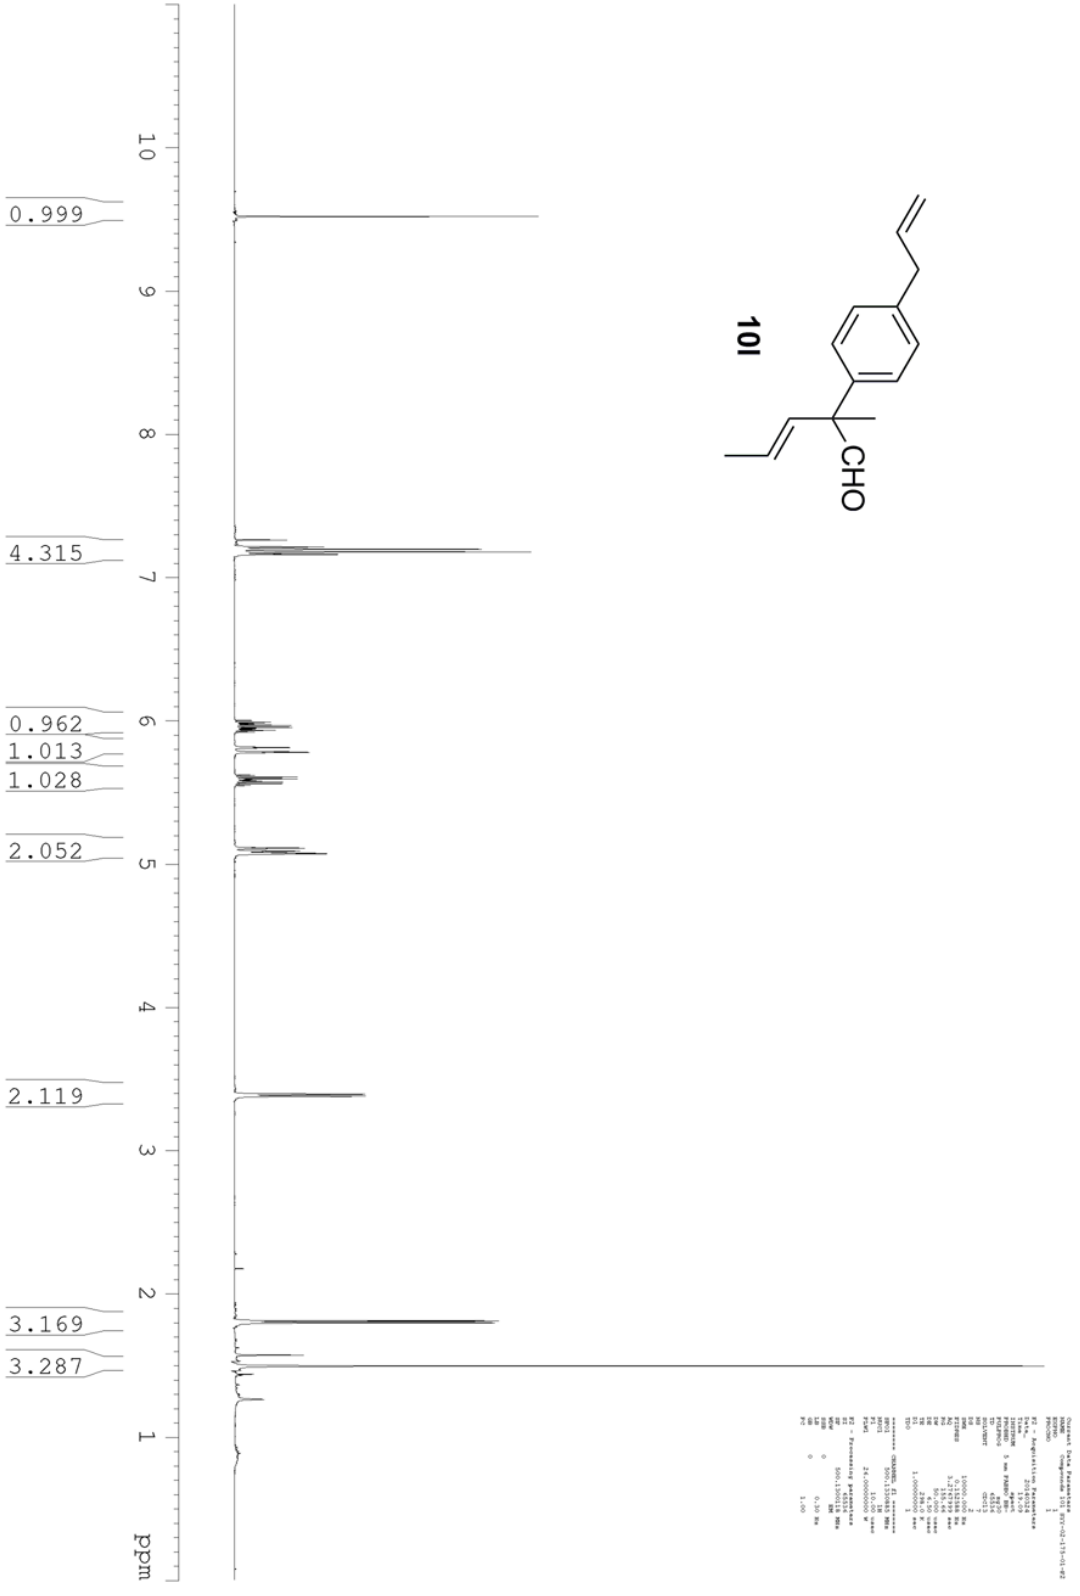

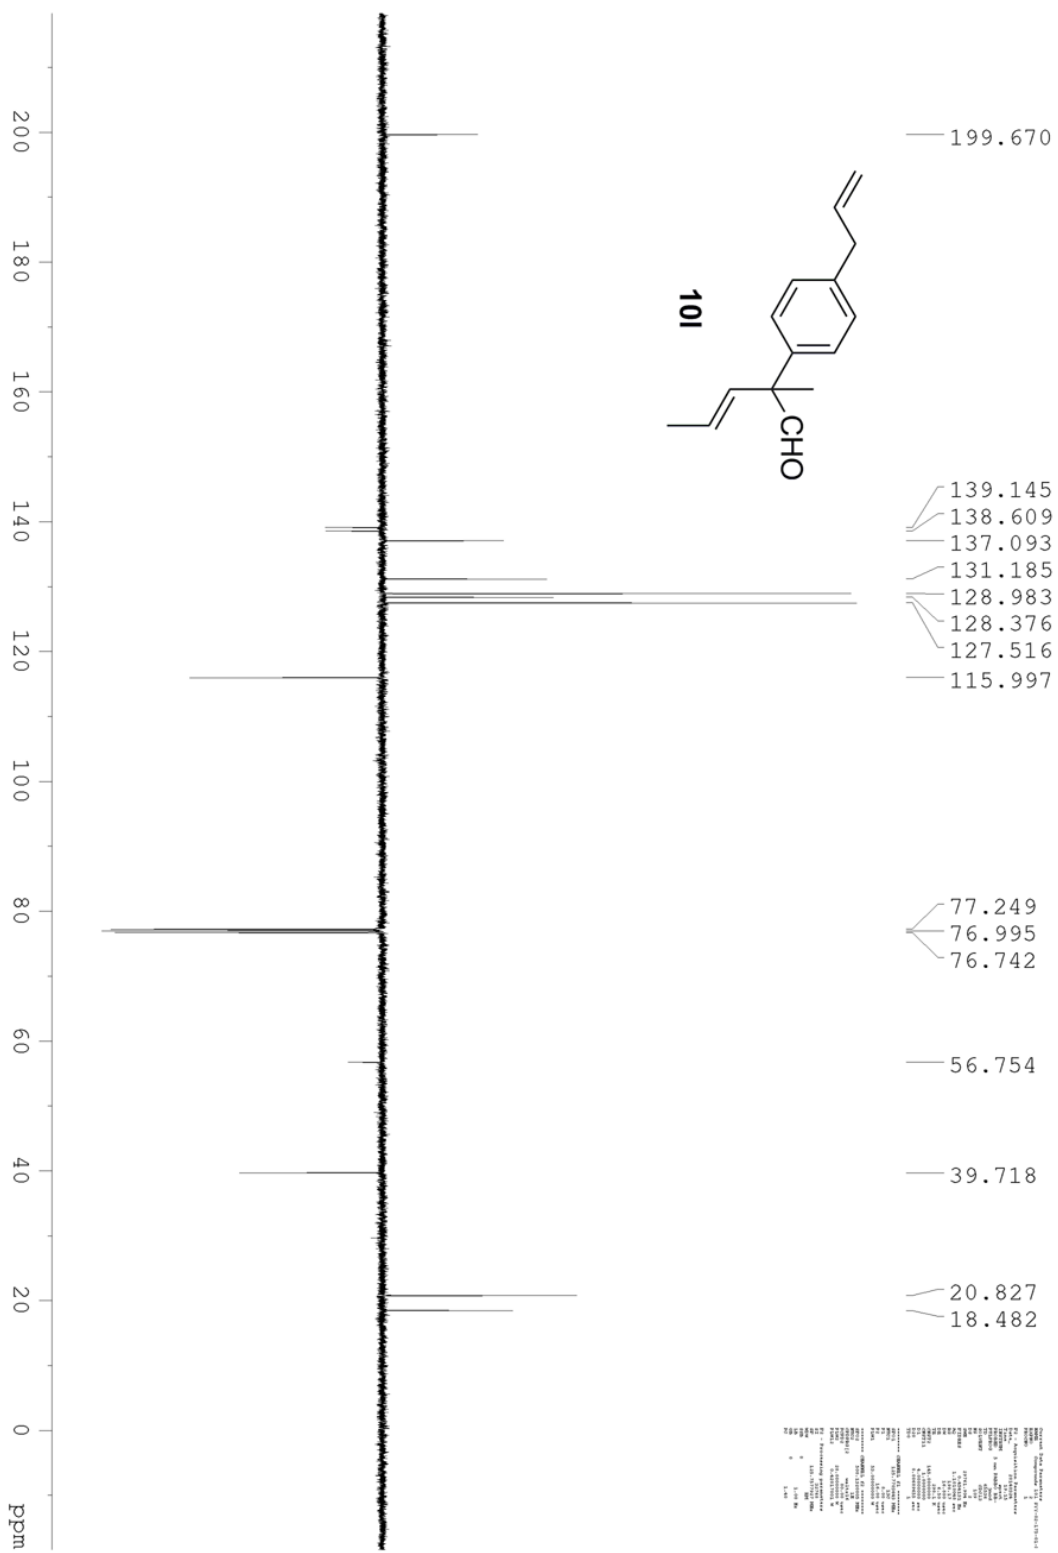

# HMBC

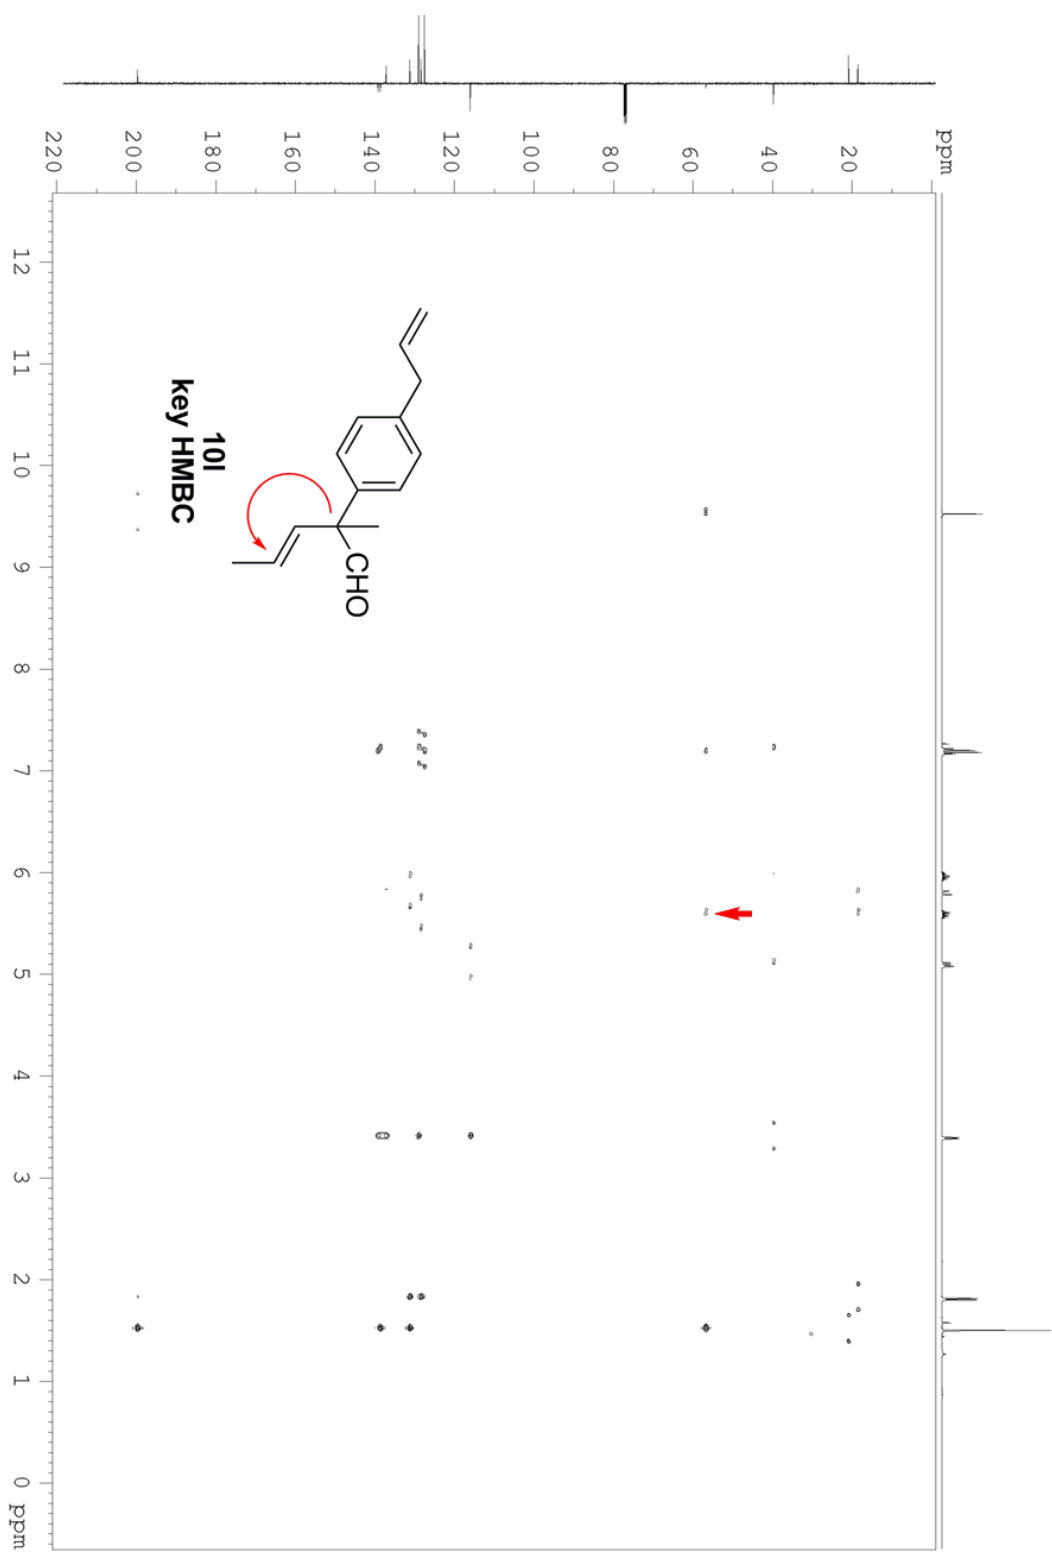

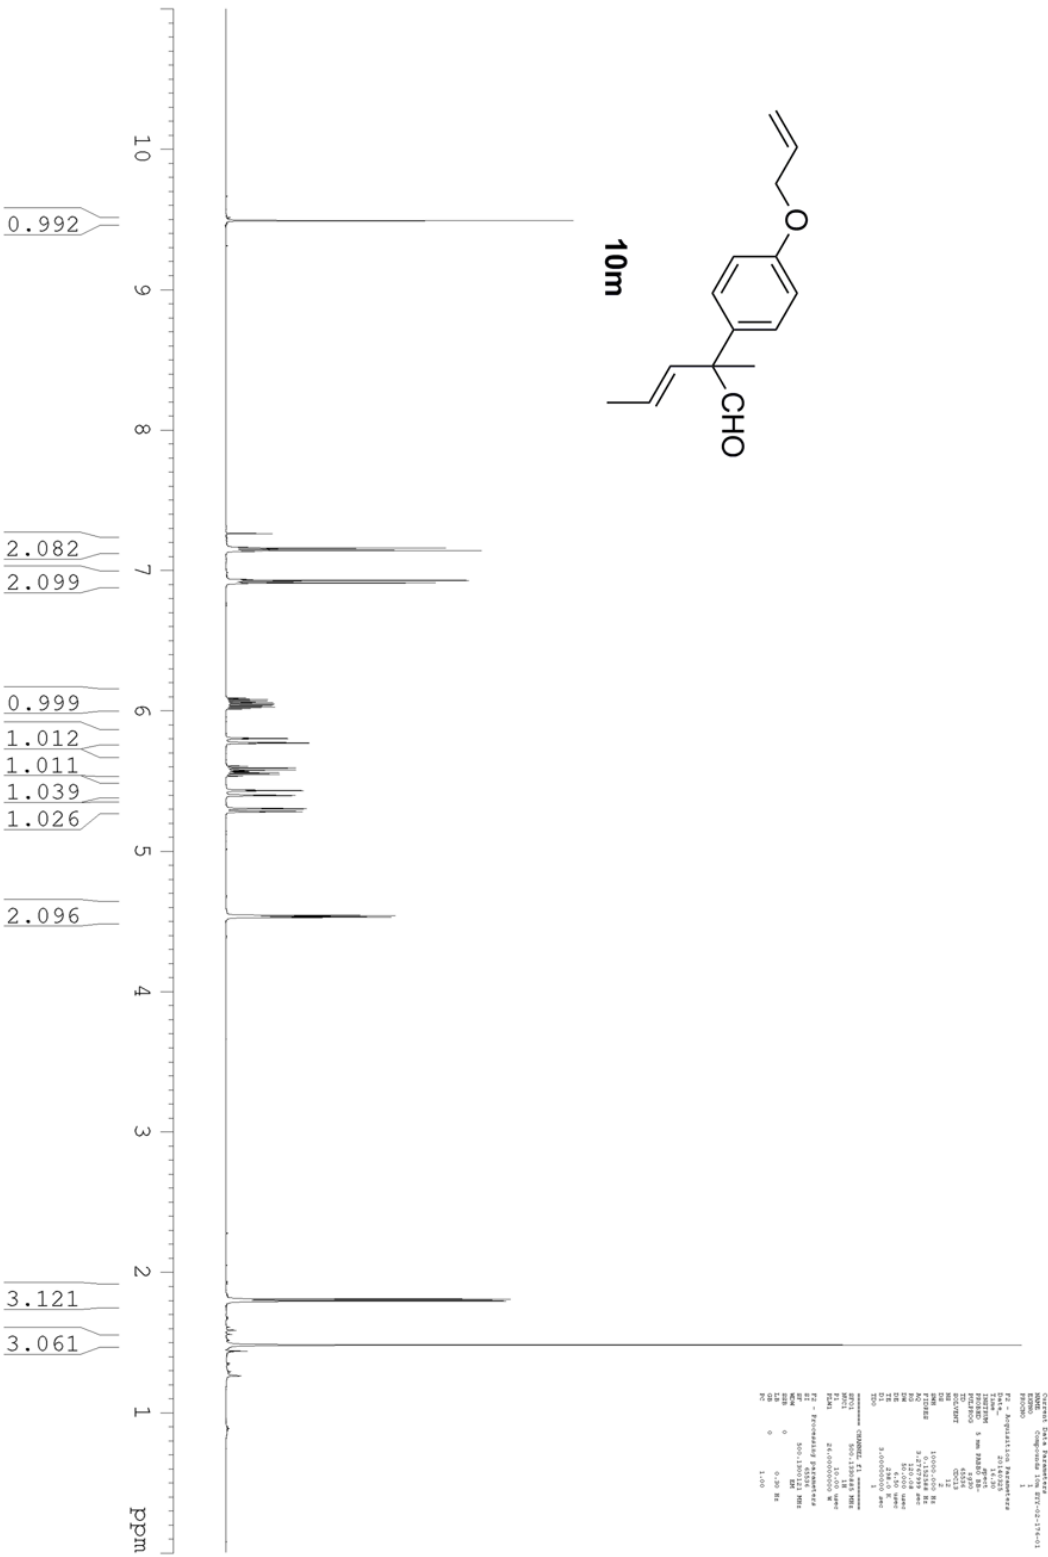



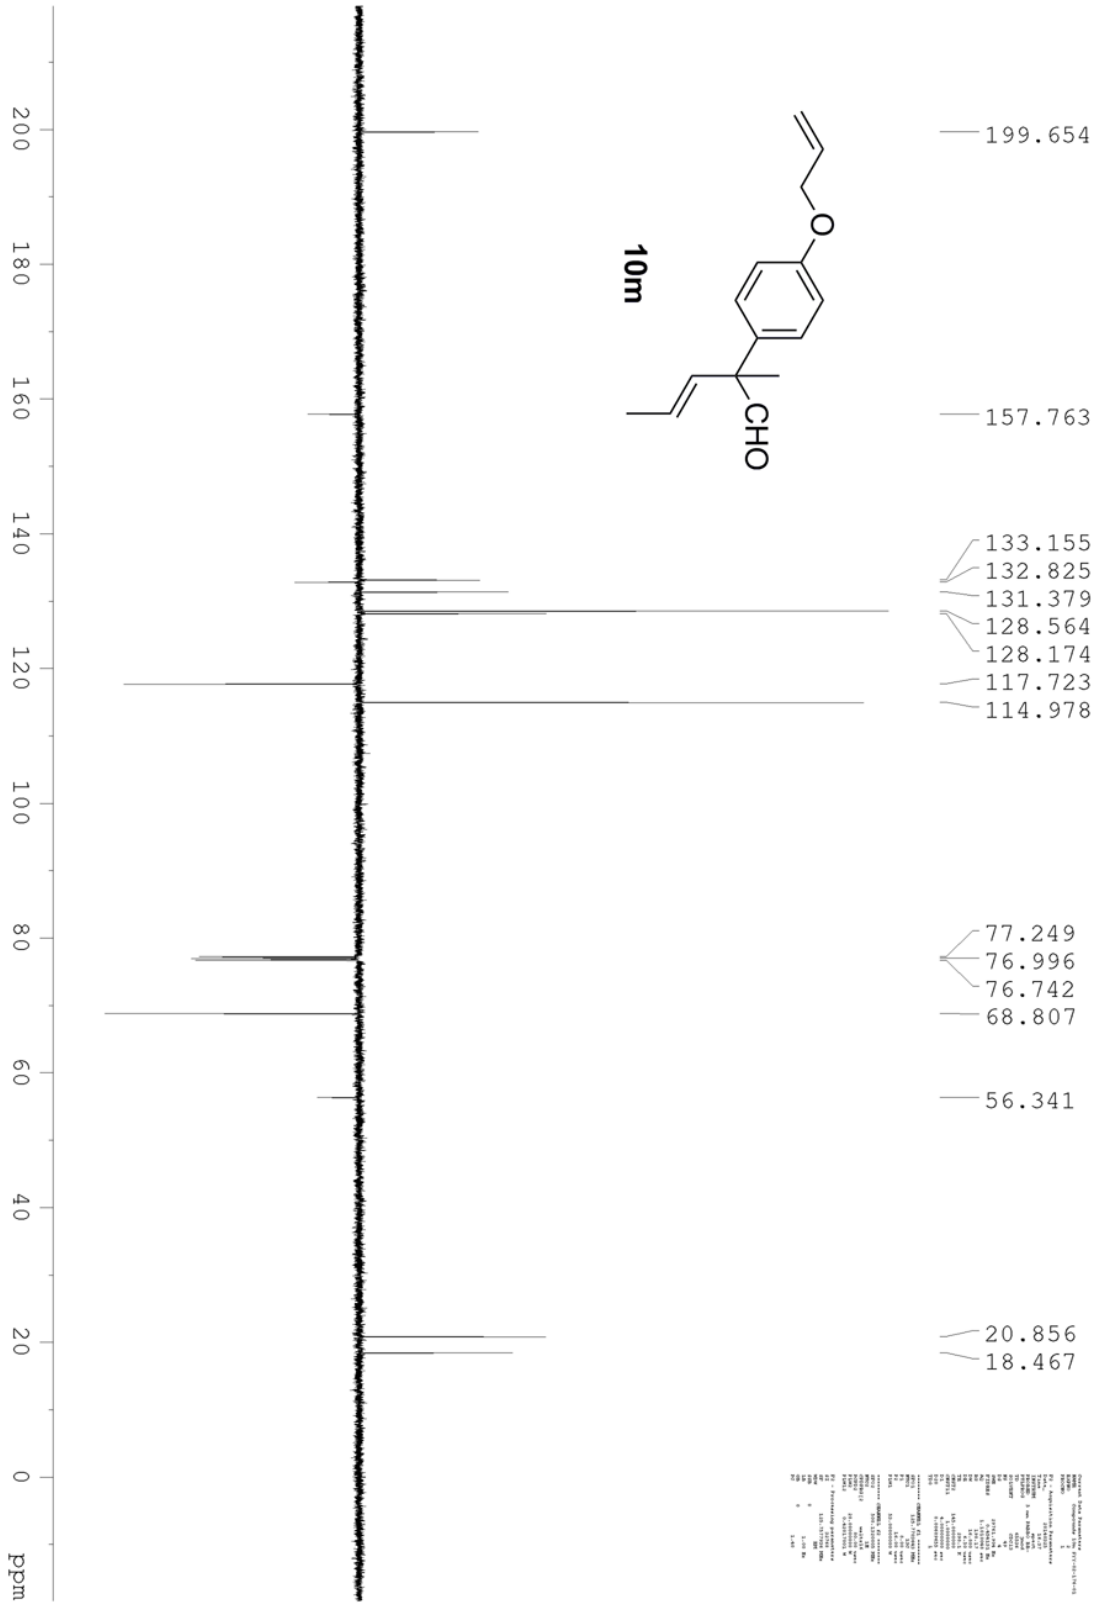

# HMBC

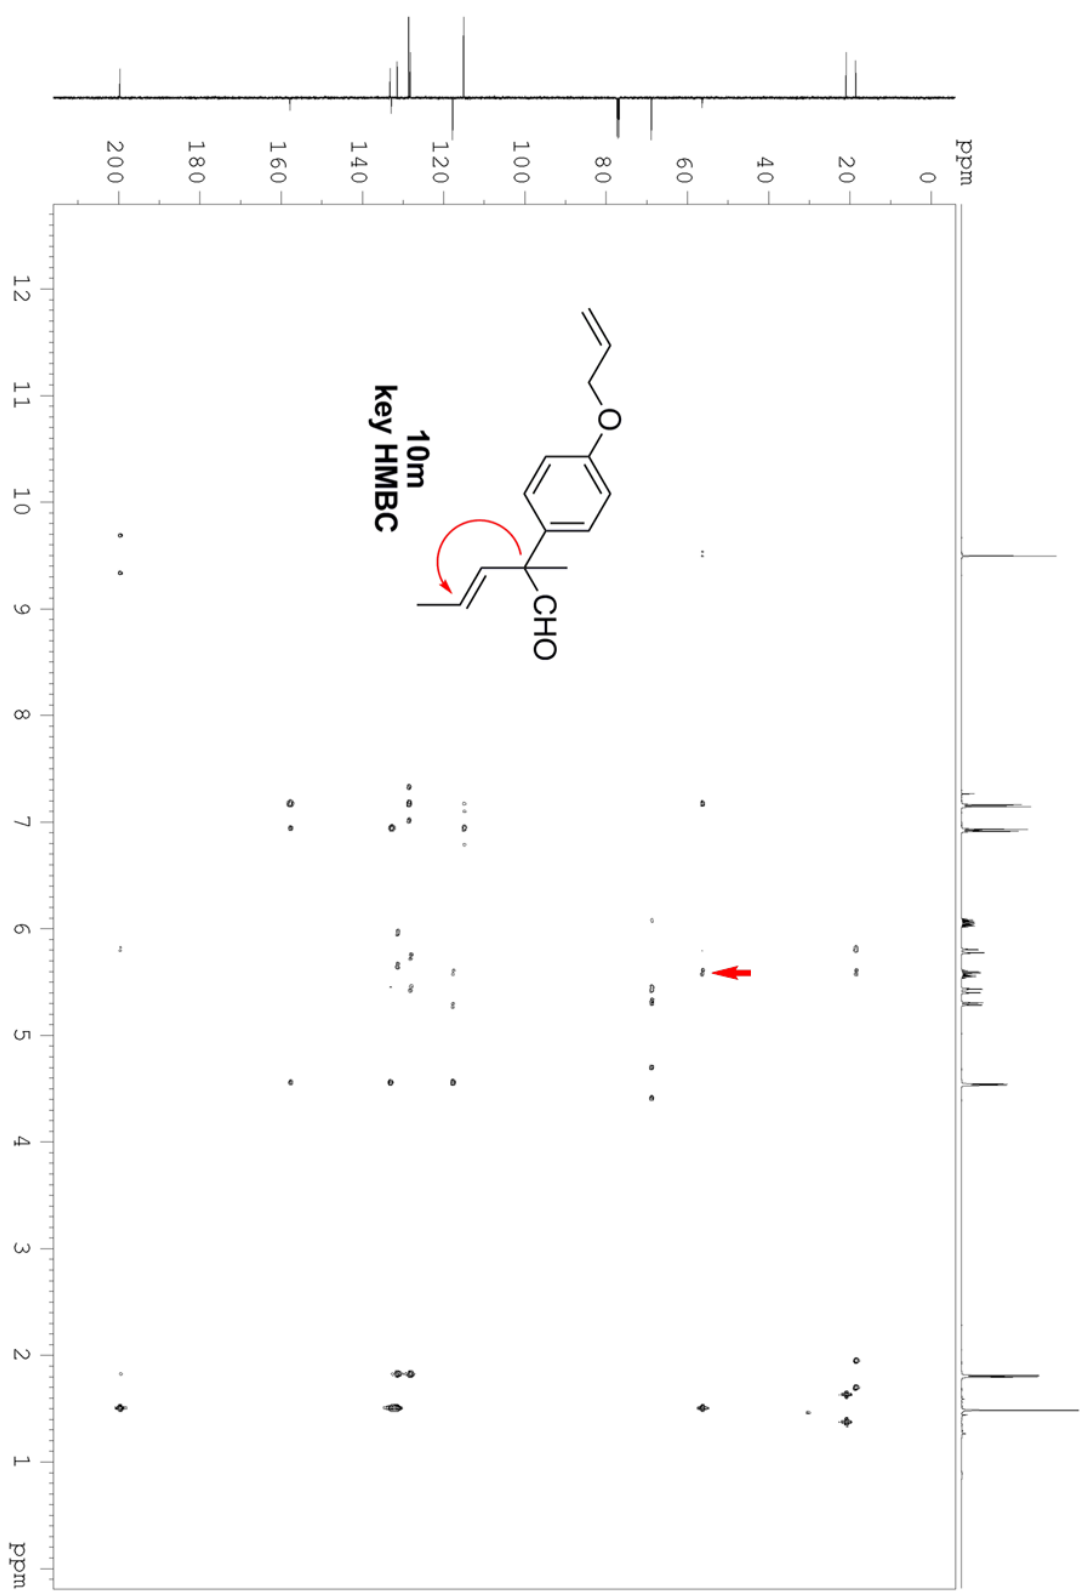





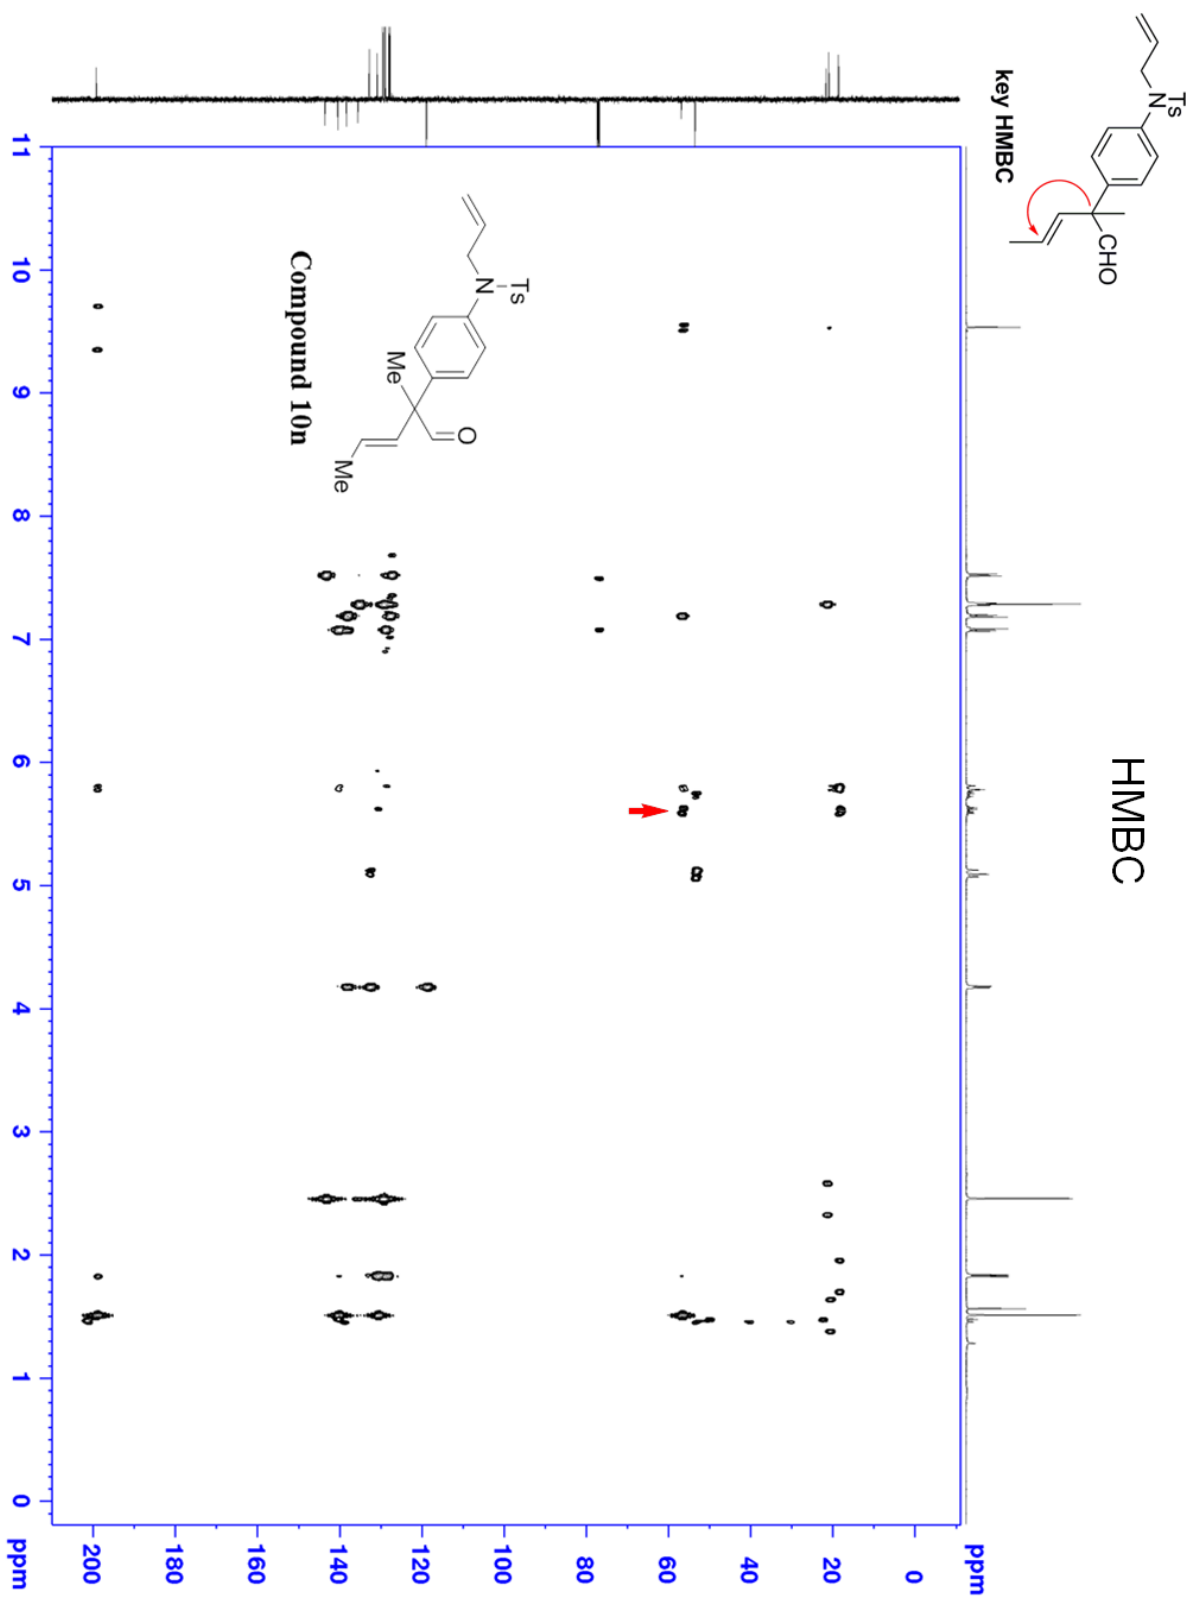

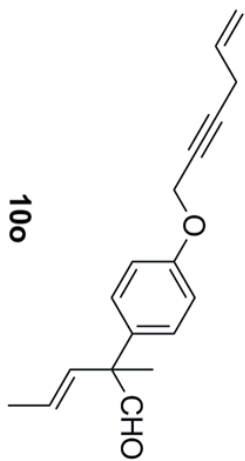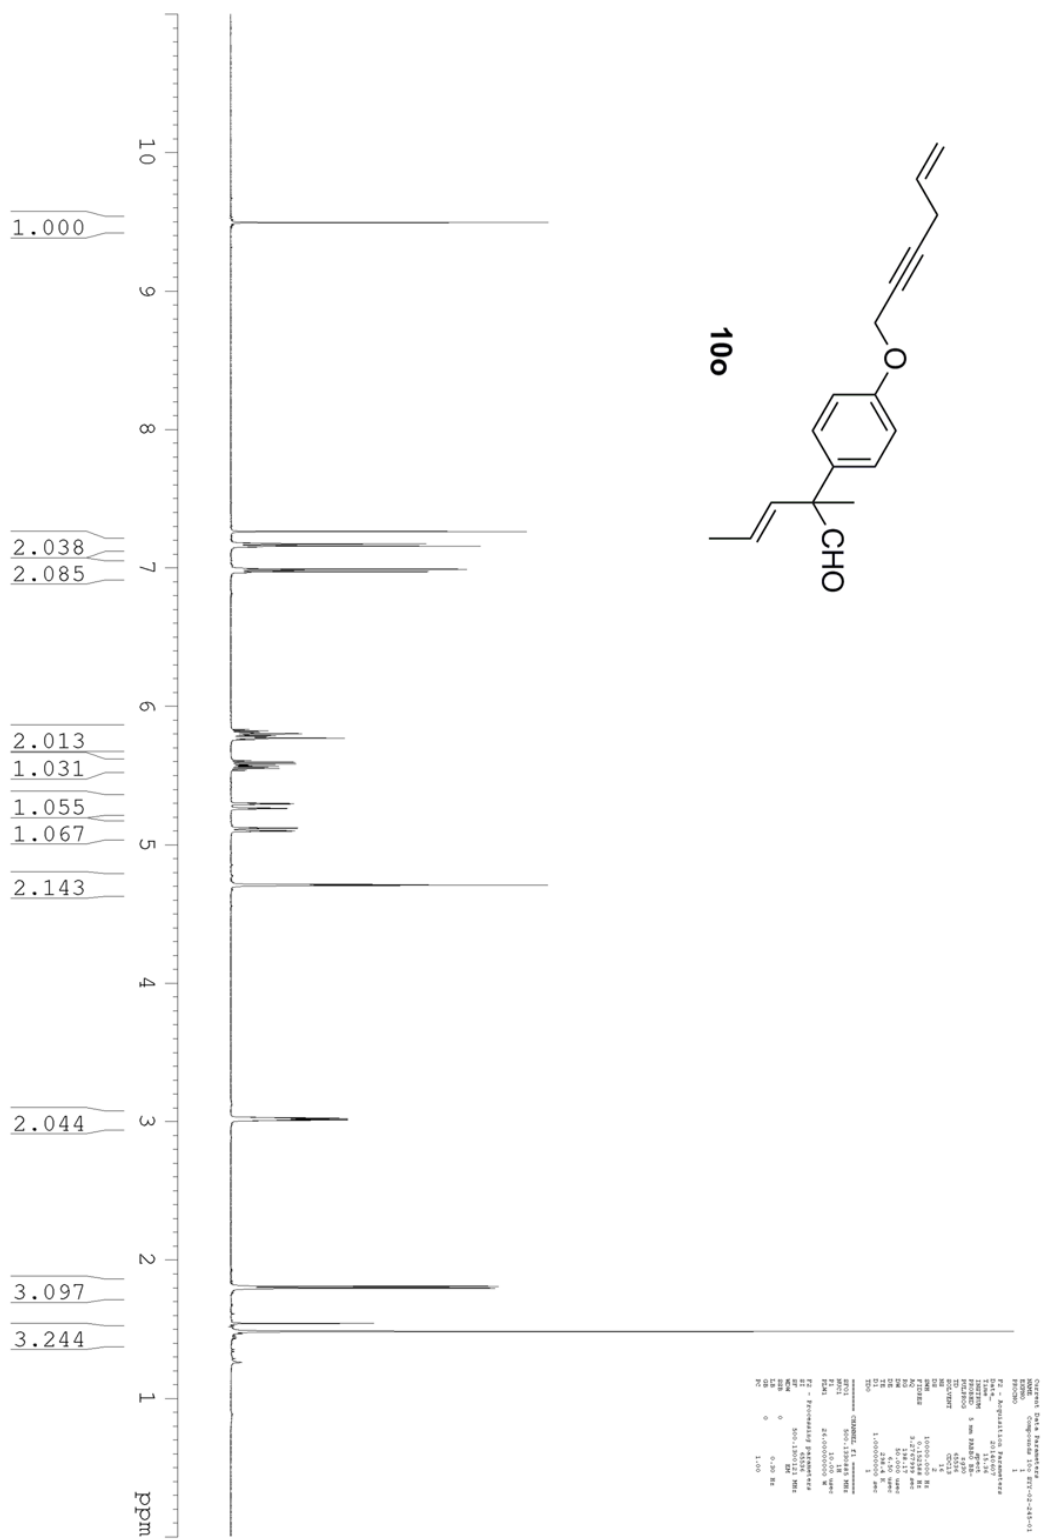



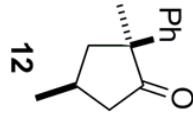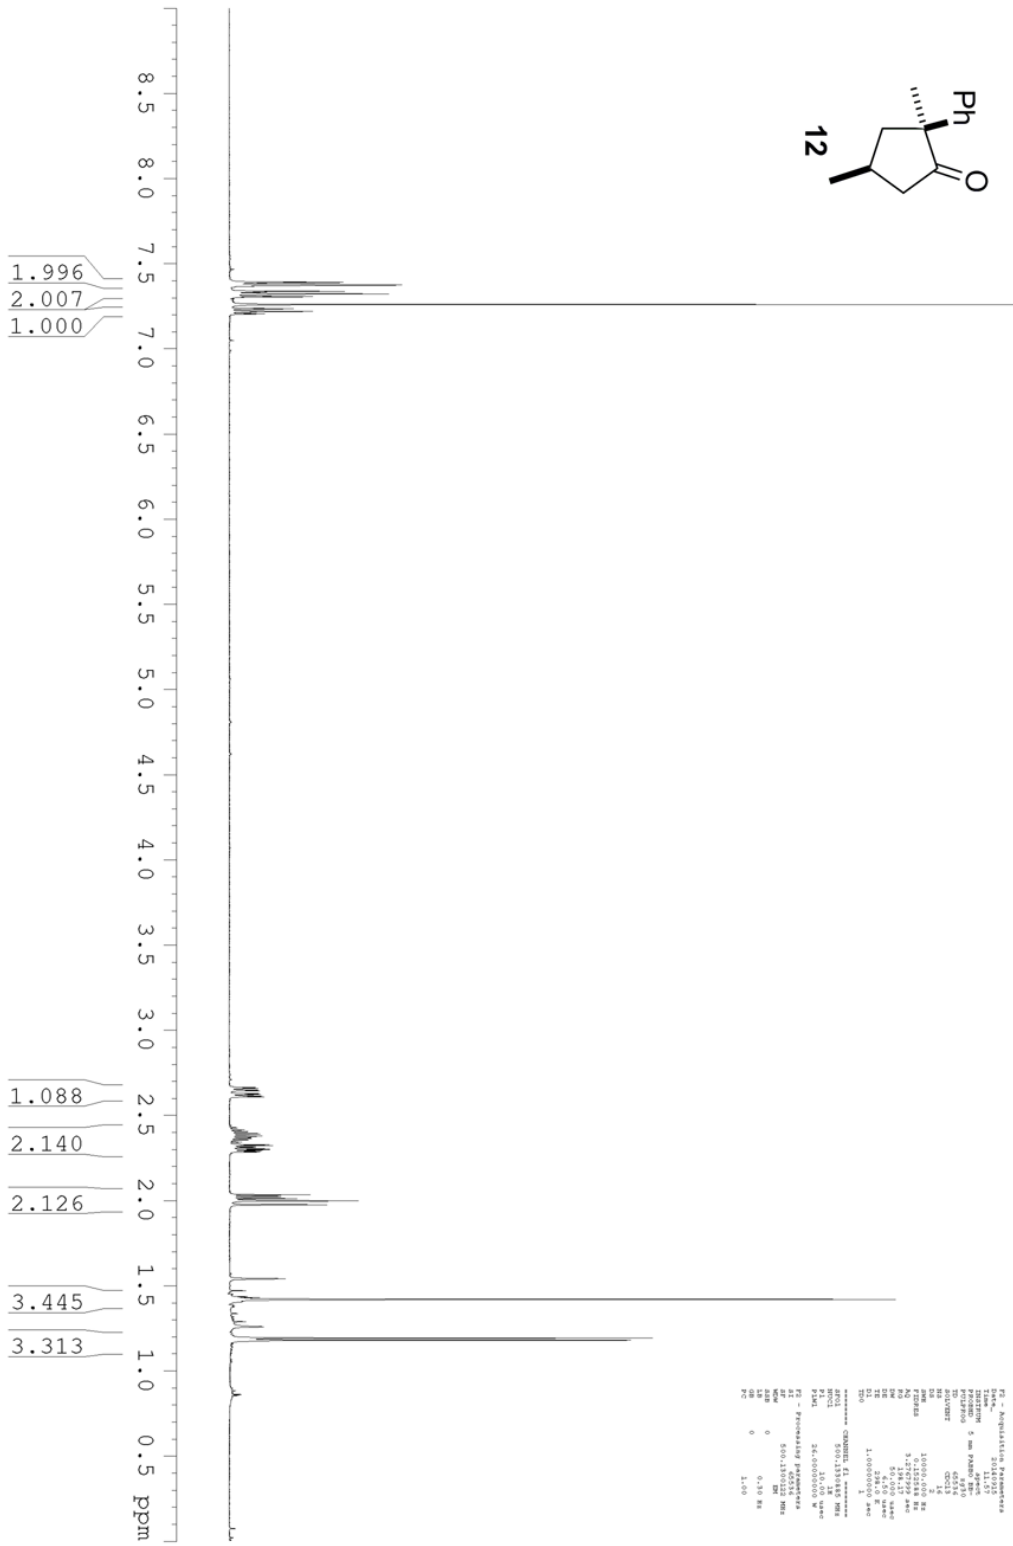



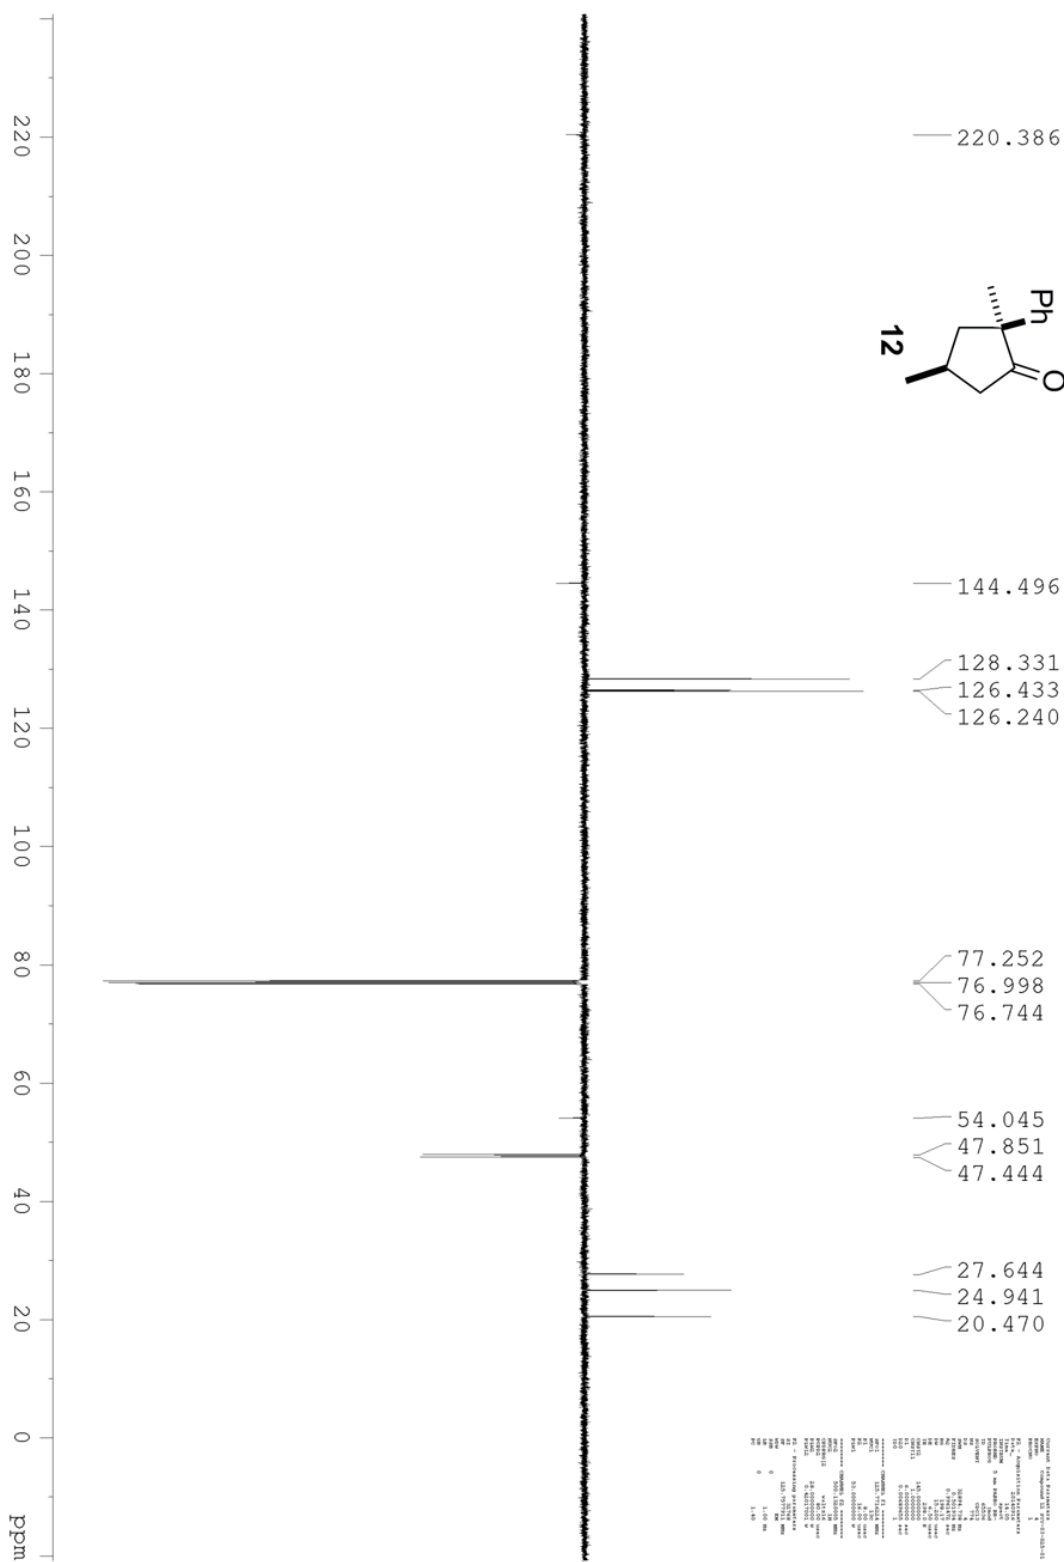



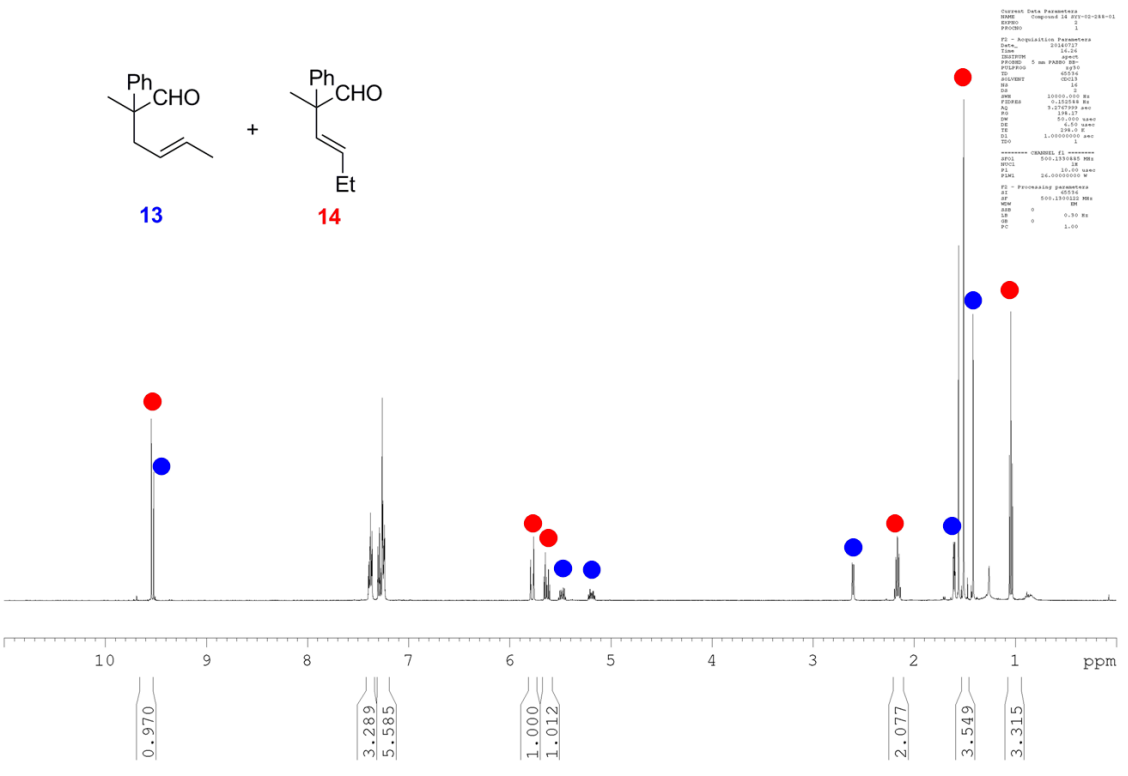

Output Data Parameters  
 NAME: Compound 14 03-02-08-01  
 EXPNO: 2  
 F2 - Acquisition Parameters  
 Date\_ 20080315  
 Time 14:24  
 Operator  
 F1FREQ 500.136250 MHz  
 PROCNO 1  
 SOLVENT CDCl3  
 NS 1024  
 DS 4  
 SWH 10000.000 kHz  
 AQ 0.12000000 sec  
 RG 655.360  
 FWHM 0.187670 MHz  
 SFO 299.613  
 EQ 0.00000000 sec  
 TE 300.2 K  
 DE 1.00000000 sec  
 DC 0.0  
 IC 0  
 DP 0

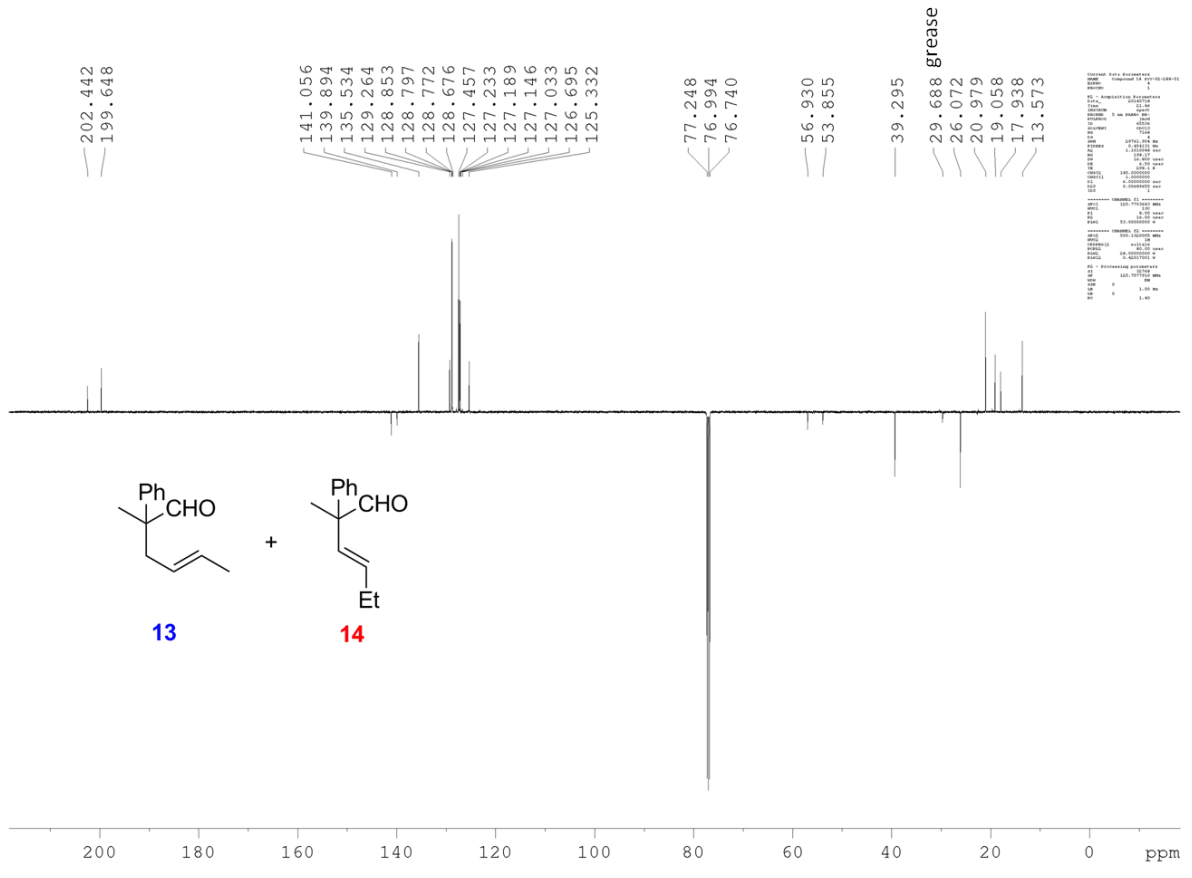

Output Data Parameters  
 NAME: Compound 14 03-02-08-01  
 EXPNO: 2  
 F2 - Acquisition Parameters  
 Date\_ 20080315  
 Time 14:24  
 Operator  
 F1FREQ 500.136250 MHz  
 PROCNO 1  
 SOLVENT CDCl3  
 NS 1024  
 DS 4  
 SWH 10000.000 kHz  
 AQ 0.12000000 sec  
 RG 655.360  
 FWHM 0.187670 MHz  
 SFO 299.613  
 EQ 0.00000000 sec  
 TE 300.2 K  
 DE 1.00000000 sec  
 DC 0.0  
 IC 0  
 DP 0

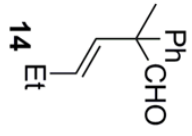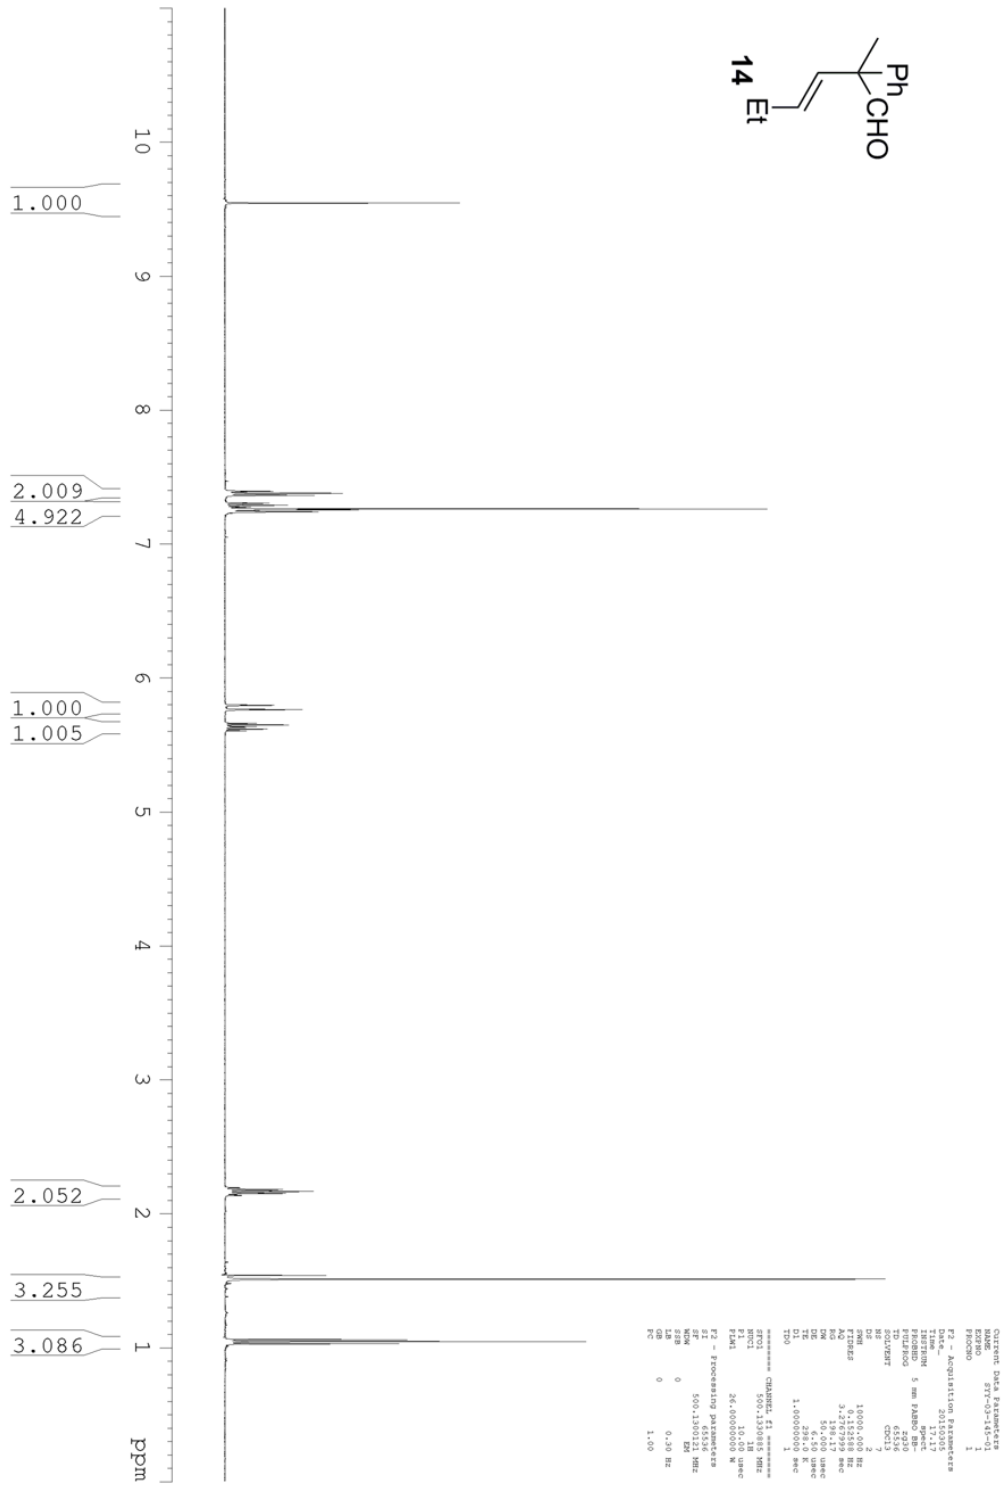



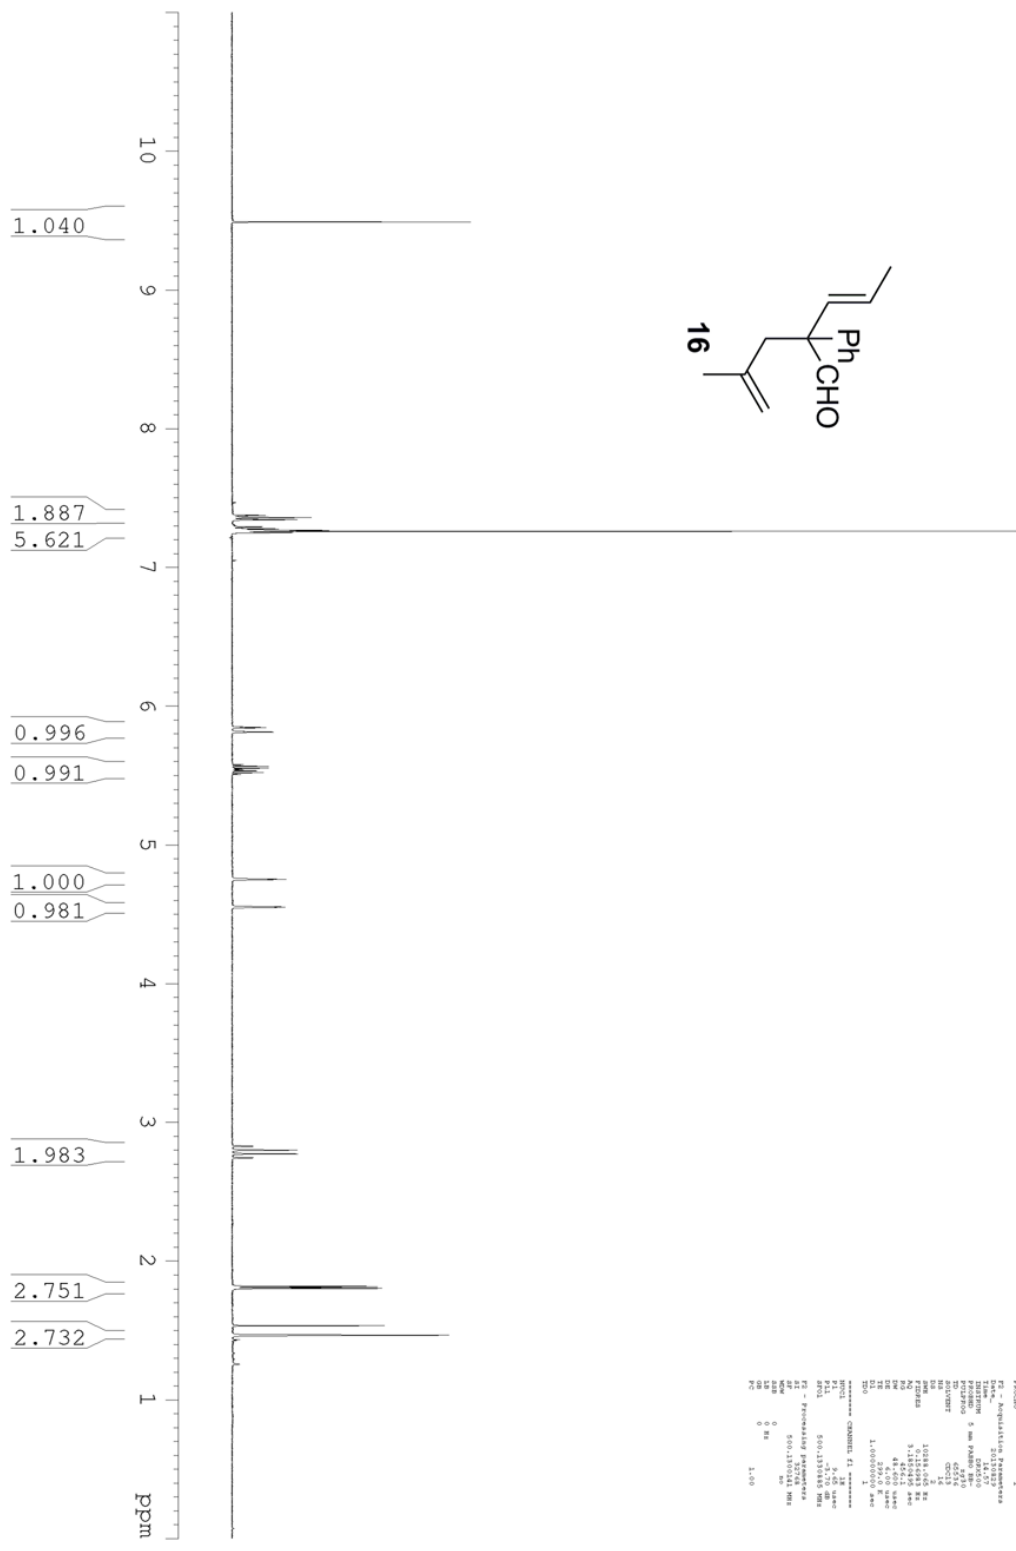

Output Data Parameters  
 Name: 160000  
 Compound ID: 160000-0171-01  
 Date: 2012/03/27  
 Time: 10:20:00  
 Instrument: 5 mm BBO Avance  
 Processor: zgpg30  
 Acquisition: 400000  
 Resolution: 0.015  
 AQ: 1.000000  
 AS: 3.150000  
 AT: 40.000000  
 TE: 300.2  
 DE: 1.000000  
 F2 - Frequency Parameters  
 F1: 400.146400 MHz  
 F2: 500.136080 MHz  
 SFO: 500.136081 MHz  
 LAM: 0.00  
 PC: 0  
 1.00



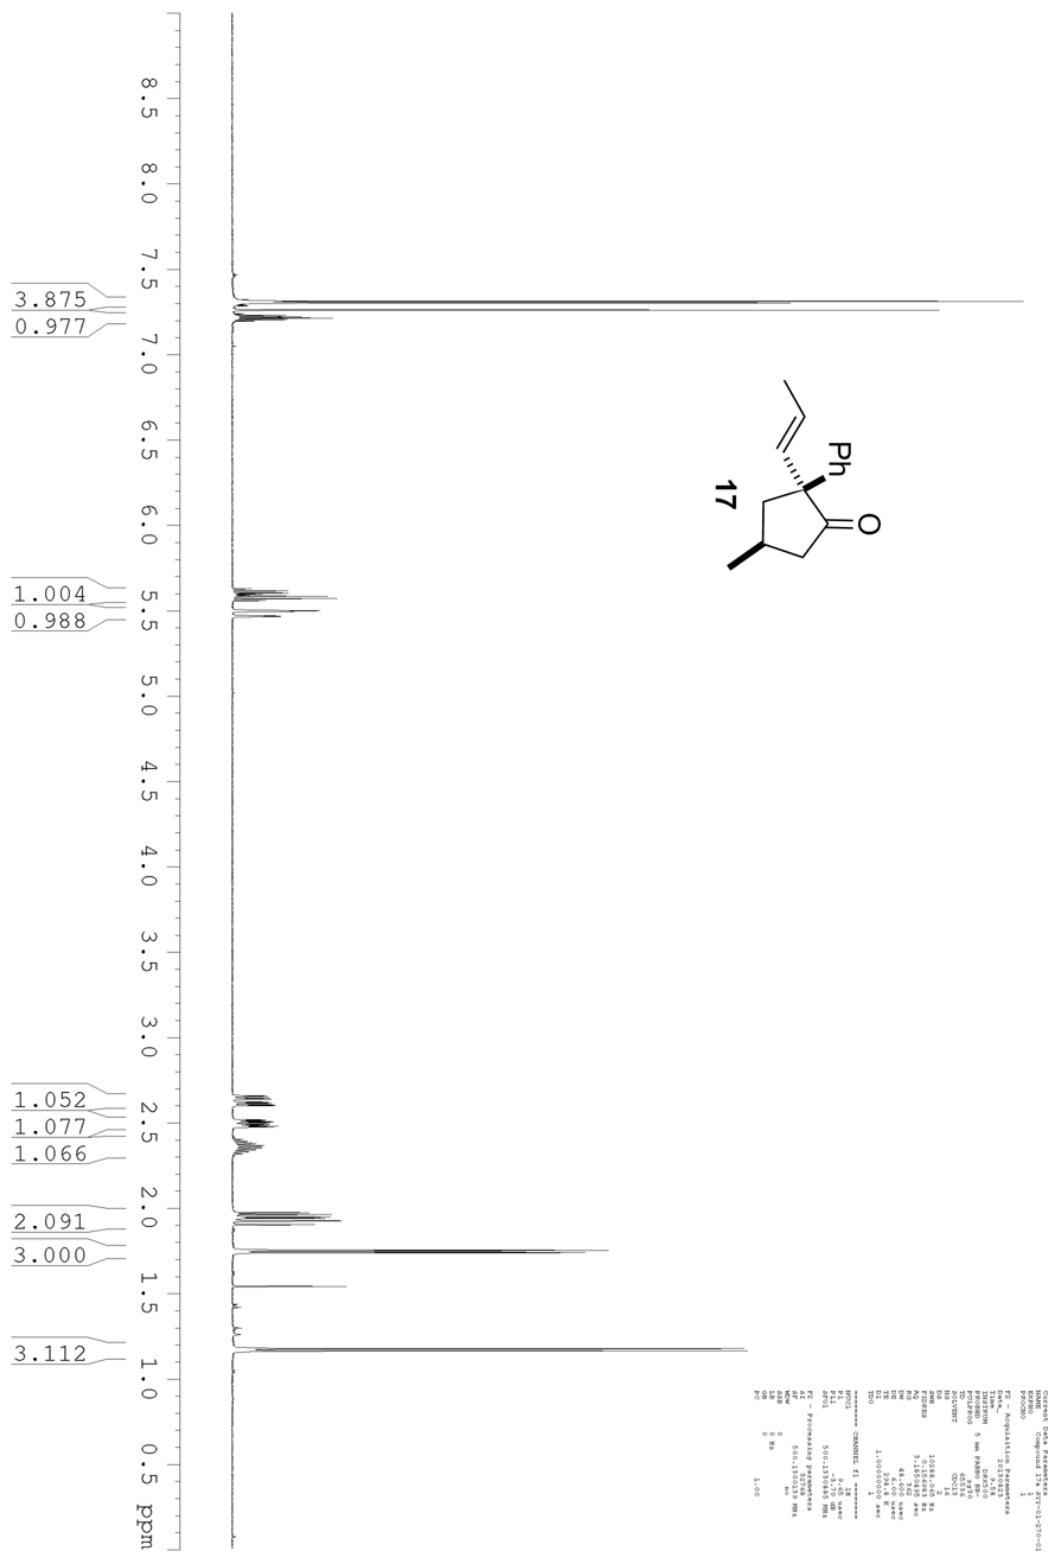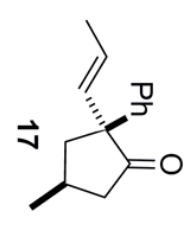

```

NAME: 17
EXPNO: 1
PROCNO: 1
PROCRES: 5
PROBHD: 5 mm PABBO-500
PULPROG: zgpg30
TD: 65536
SOLVENT: CDCl3
NS: 1280
DS: 4
SWH: 10081.600 MHz
F2: 500.136400 MHz
AQ: 0.10000000 sec
RG: 400
AQ2: 0.02500000 sec
SI: 32768
SF: 1200.150000 MHz
WDW: EM
SSB: 0
LB: 0.000000 MHz
GB: 0
PC: 1.00000000 sec
=====
F2 - Acquisition Parameters
Date_   : 20140416
Time    : 12.41
INSTRUM : spect
PROBHD  : 5 mm PABBO-500
PULPROG : zgpg30
TD       : 65536
SOLVENT : CDCl3
NS       : 1280
DS       : 4
SWH      : 10081.600 MHz
F2       : 500.136400 MHz
AQ       : 0.10000000 sec
RG       : 400
AQ2      : 0.02500000 sec
SI       : 32768
SF       : 1200.150000 MHz
WDW      : EM
SSB      : 0
LB       : 0.000000 MHz
GB       : 0
PC       : 1.00000000 sec
=====
=====
NAME: 17
EXPNO: 1
PROCNO: 1
PROCRES: 5
PROBHD: 5 mm PABBO-500
PULPROG: zgpg30
TD: 65536
SOLVENT: CDCl3
NS: 1280
DS: 4
SWH: 10081.600 MHz
F2: 500.136400 MHz
AQ: 0.10000000 sec
RG: 400
AQ2: 0.02500000 sec
SI: 32768
SF: 1200.150000 MHz
WDW: EM
SSB: 0
LB: 0.000000 MHz
GB: 0
PC: 1.00000000 sec
=====

```



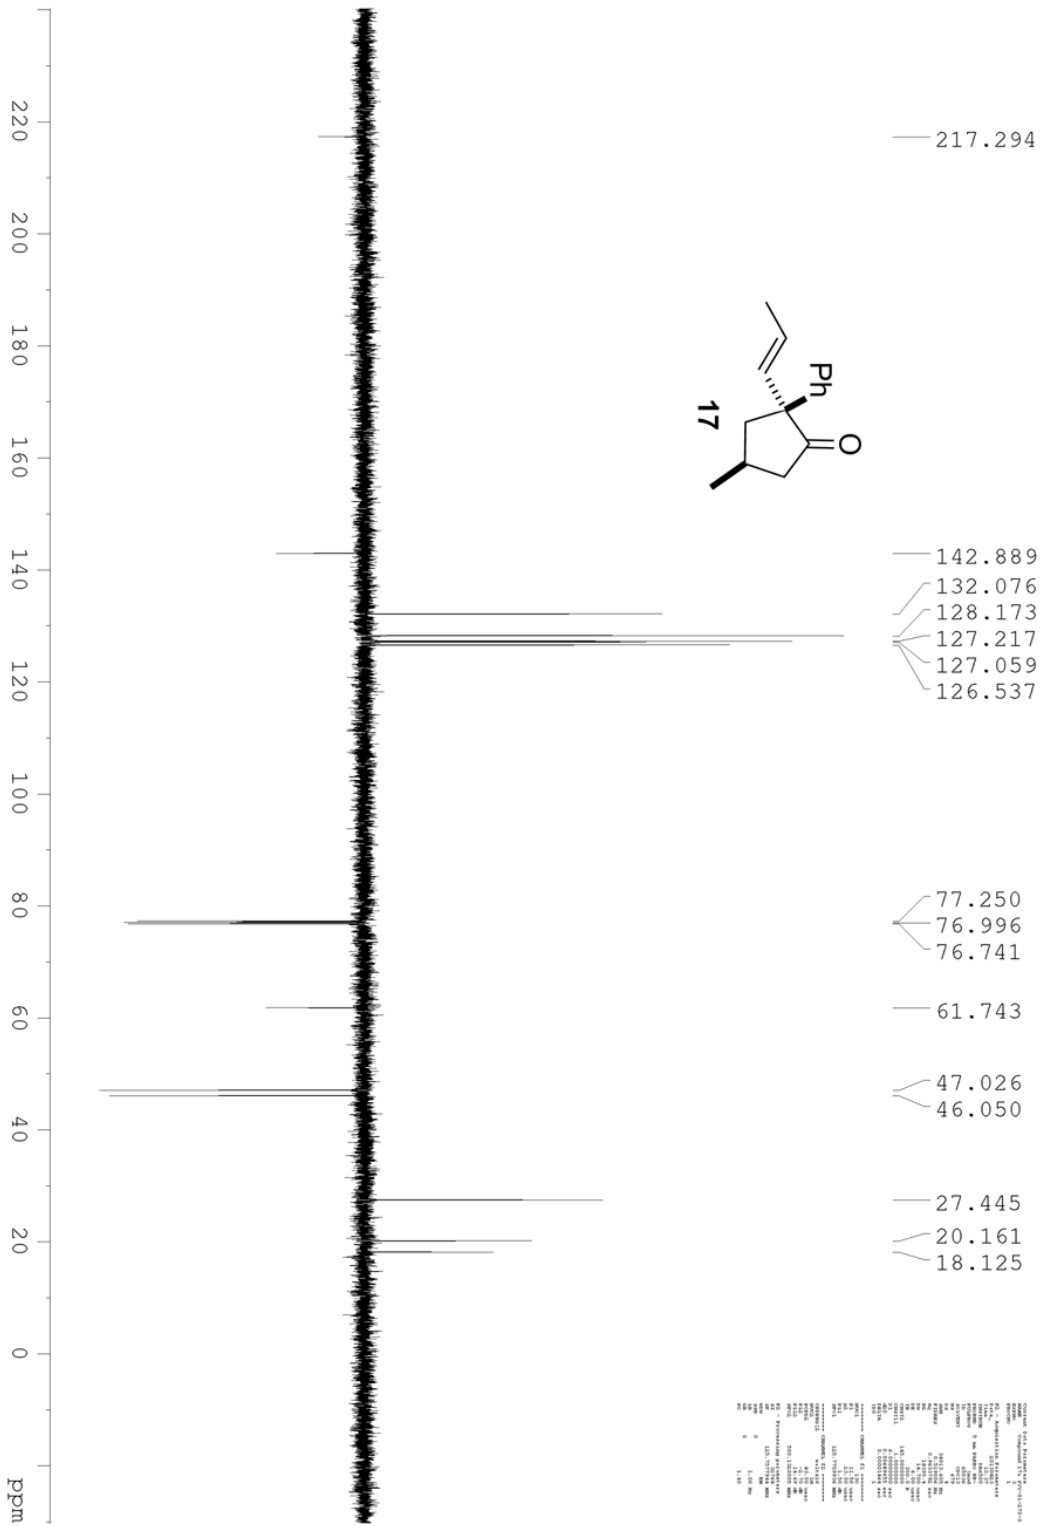

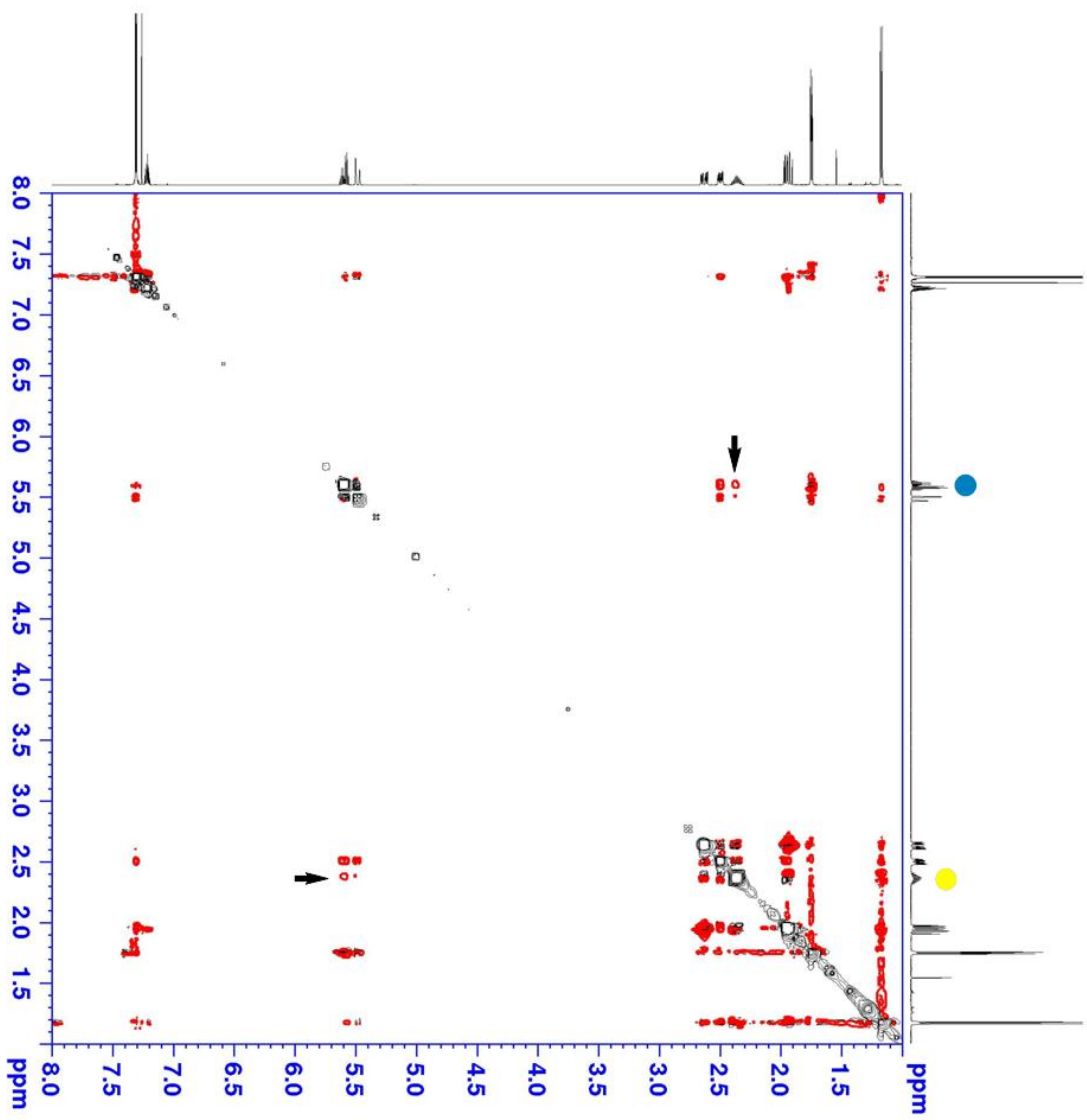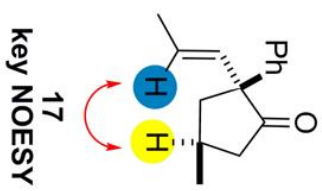



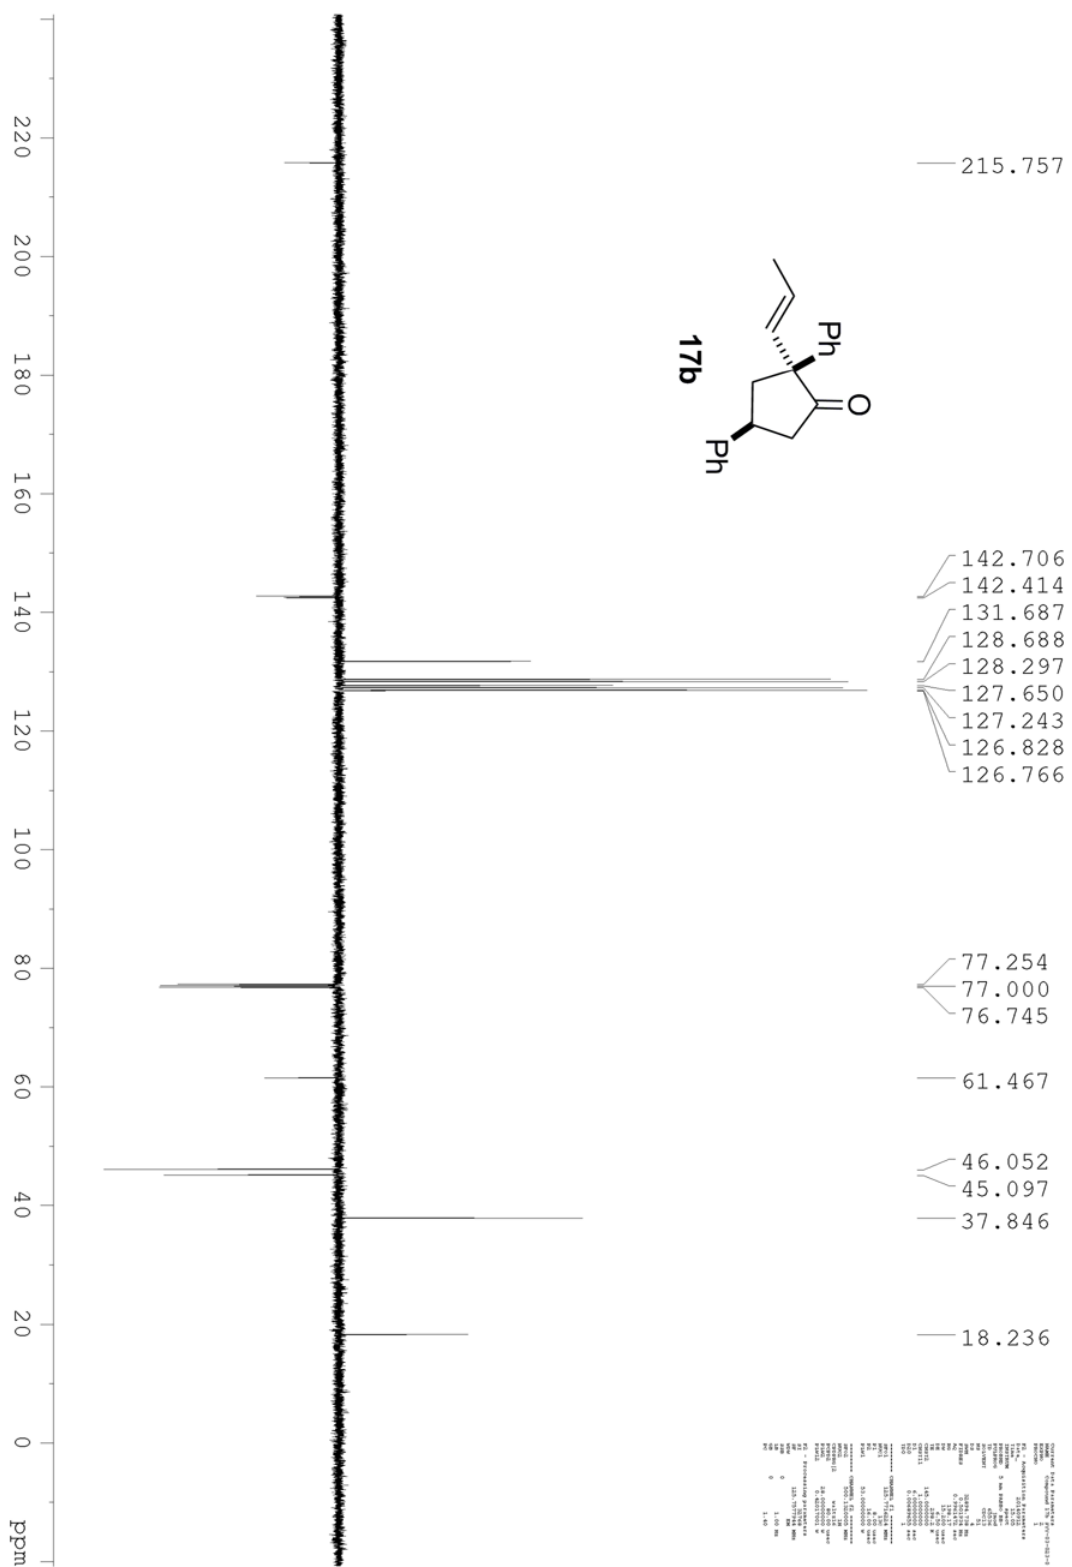

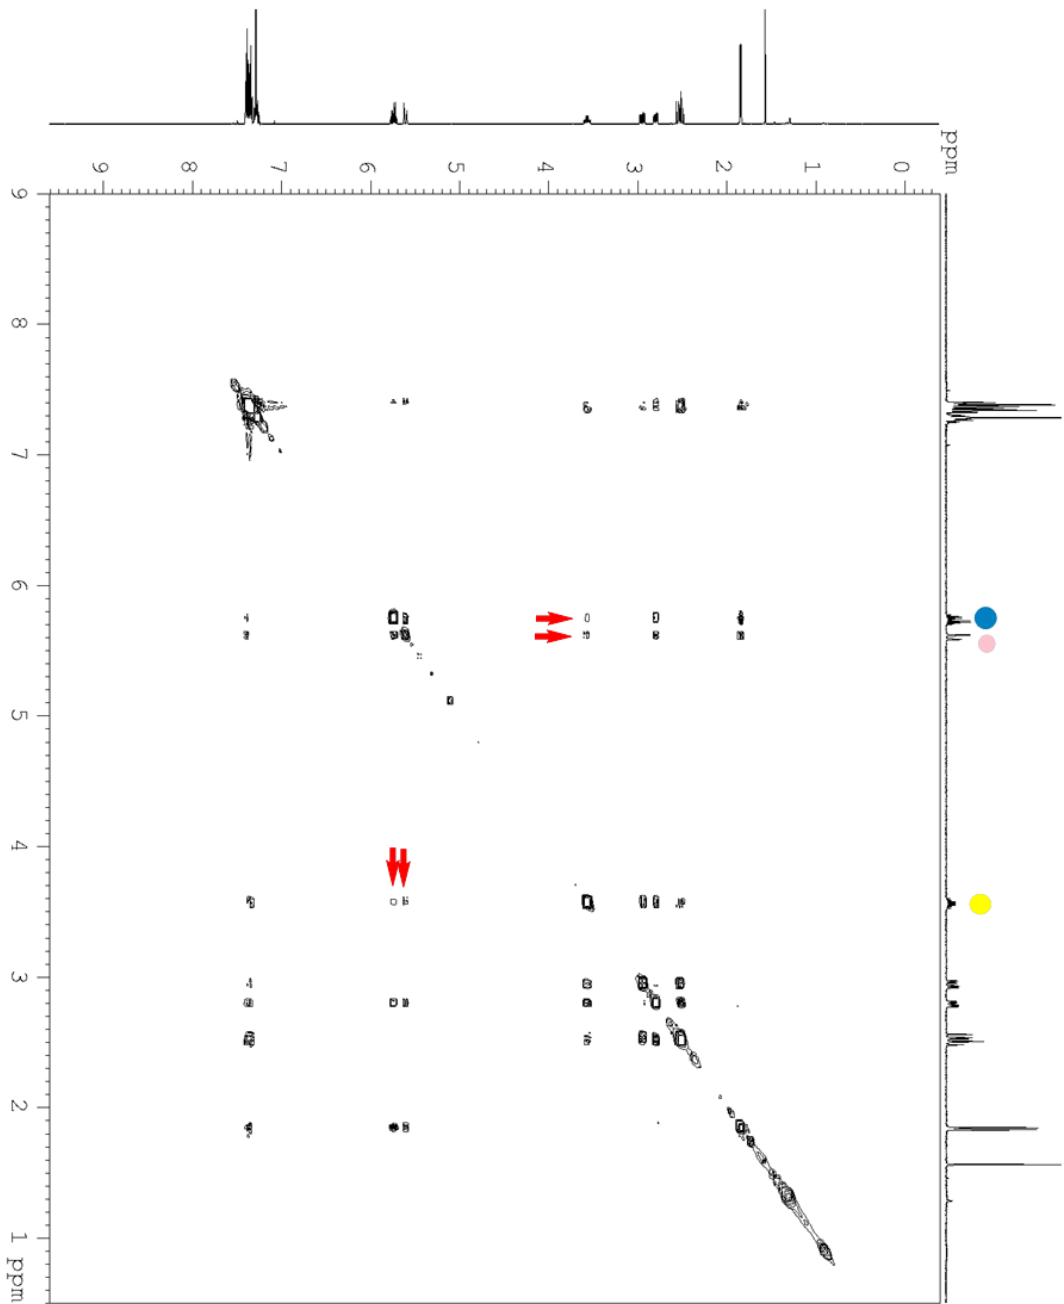

```

Output Data Parameters
=====
EXPNO      1
PROCNO     1
PROBHD     5 mm BBO-5
PULPROG    zgpg30
TD         65536
SOLVENT    CDCl3
NS         2
DS         2
SWH         5000.0000 MHz
F2         500.1362610 MHz
AQ         0.24444444 sec
RG          1024
AQ2         0.24444444 sec
RG2         1024
SI          32768
SF          500.1362610 MHz
WDW         EM
SSB         0
LB          0.00000000 MHz
GB          0
PC          1.00
===== CHANNEL f1 =====
NUC1       13C
P1         19.00
PL1        0 dB
SFO1       125.7611763 MHz
RG1        65536
AQ1        0.24444444 sec
RG2        1024
SFO2       500.1362610 MHz
===== CHANNEL f2 =====
NUC2       1H
P2         13.00
PL2        0 dB
SFO2       500.1362610 MHz
===== ORBITAL CHANNEL =====
ORBITAL   1
SFO        400.1455223 MHz
RG         65536
AQ         0.24444444 sec
RG2        1024
SFO2       500.1362610 MHz
=====
F1 - Acquisition parameters
=====
PROCNO     1
PROBHD     5 mm BBO-5
PULPROG    zgpg30
TD         65536
SOLVENT    CDCl3
NS         2
DS         2
SWH         5000.0000 MHz
F2         500.1362610 MHz
AQ         0.24444444 sec
RG          1024
AQ2         0.24444444 sec
RG2         1024
SI          32768
SF          500.1362610 MHz
WDW         EM
SSB         0
LB          0.00000000 MHz
GB          0
PC          1.00
F1 - Processing parameters
=====
SI          32768
SF          500.1362610 MHz
WDW         EM
SSB         0
LB          0.00000000 MHz
GB          0
PC          1.00
=====
  
```

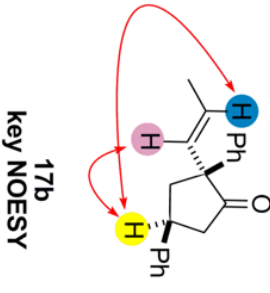

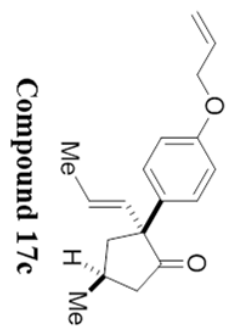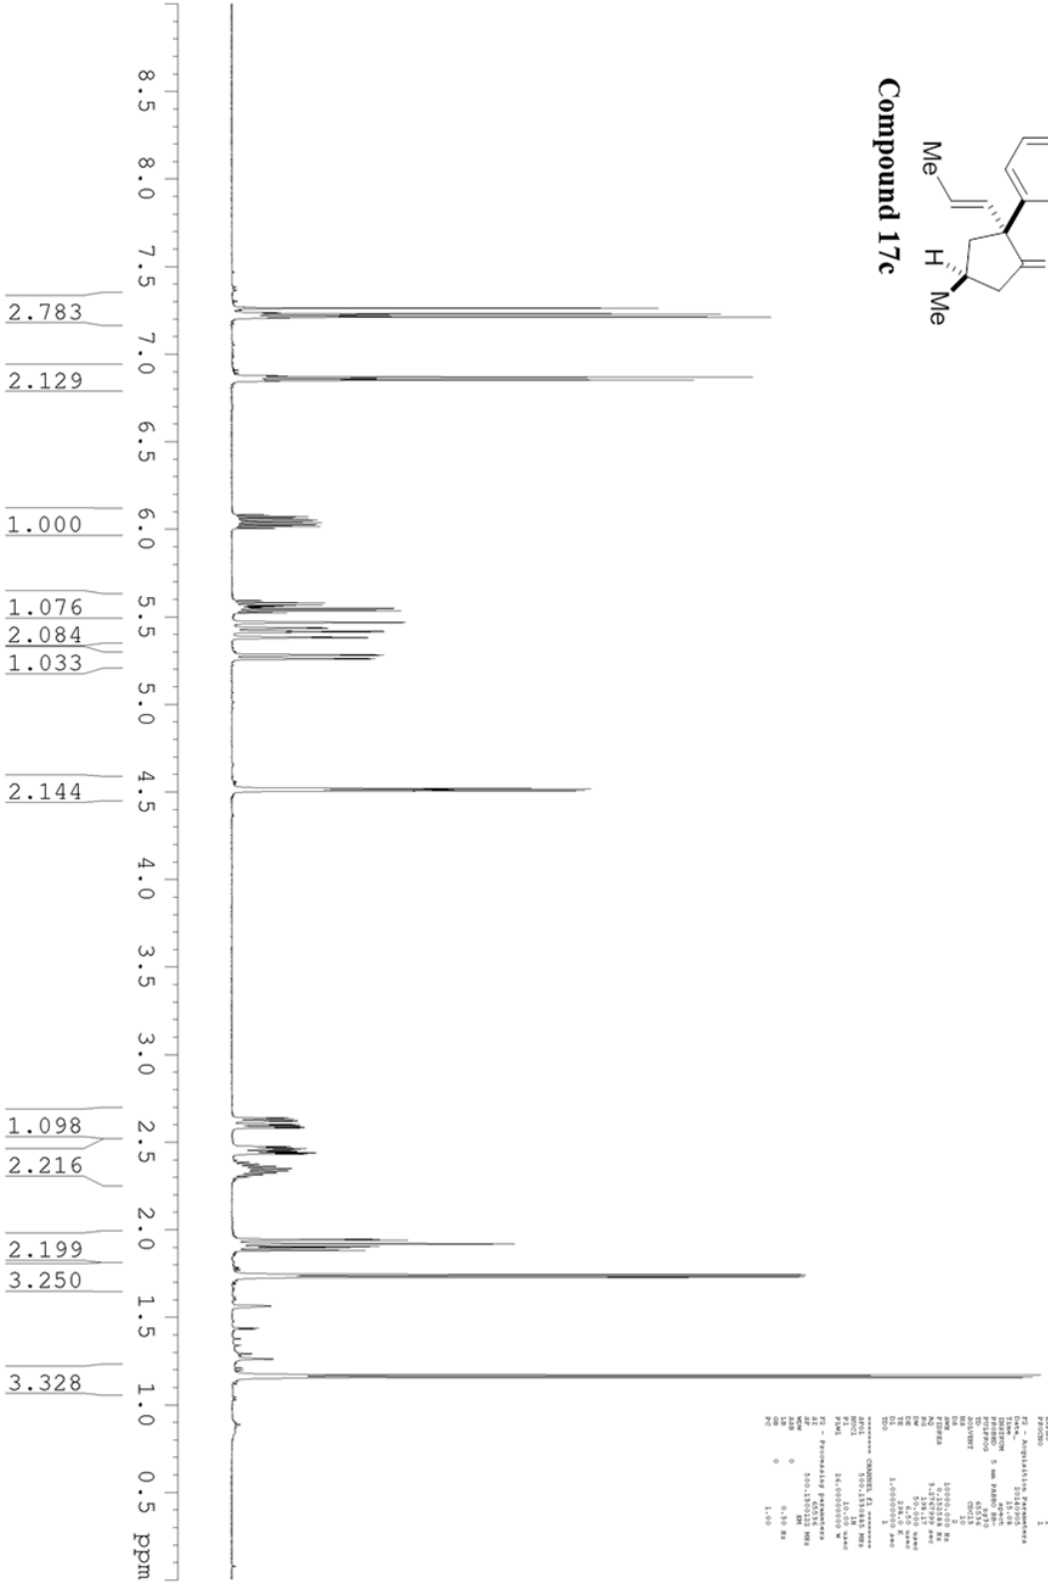

```

Output Data Parameters
=====
Date_      20240905
Time_     11:07:42.00
F2 - Acquisition Parameters
-----
Date_     20240905
Time_    11:07:42
INSTRUM   spect
PROBHD    5 mm BBO
PULPROG   zgpg30
AQ        0.20000000
SFO       500.1307618
AQUA      0.00100000
AQUS      0.00100000
===== CHANNEL f1 =====
NUC1      13C
P1        12.00000000
PL1       0.00
===== CHANNEL f2 =====
NUC2      1H
P2        1.00000000
PL2       0.00
=====
F2 - Processing parameters
-----
Date_     20240905
Time_    11:07:42
INSTRUM   spect
PROBHD    5 mm BBO
PULPROG   zgpg30
AQ        0.20000000
SFO       500.1307618
AQUA      0.00100000
AQUS      0.00100000
=====
  
```

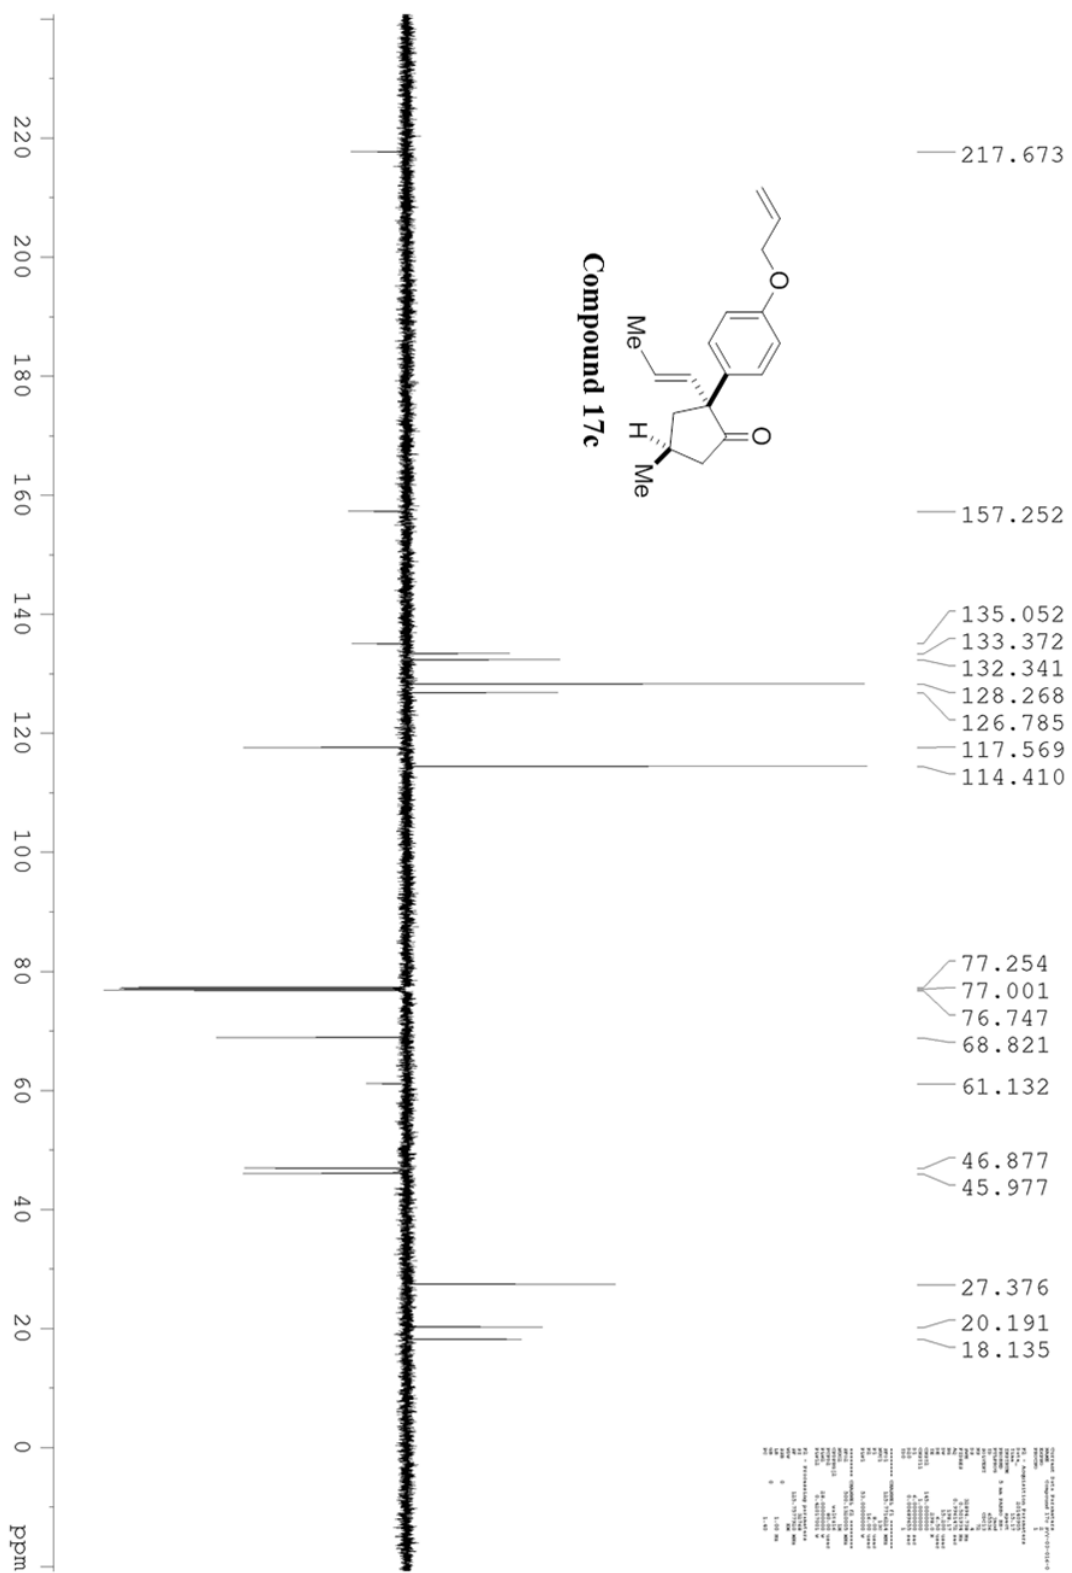

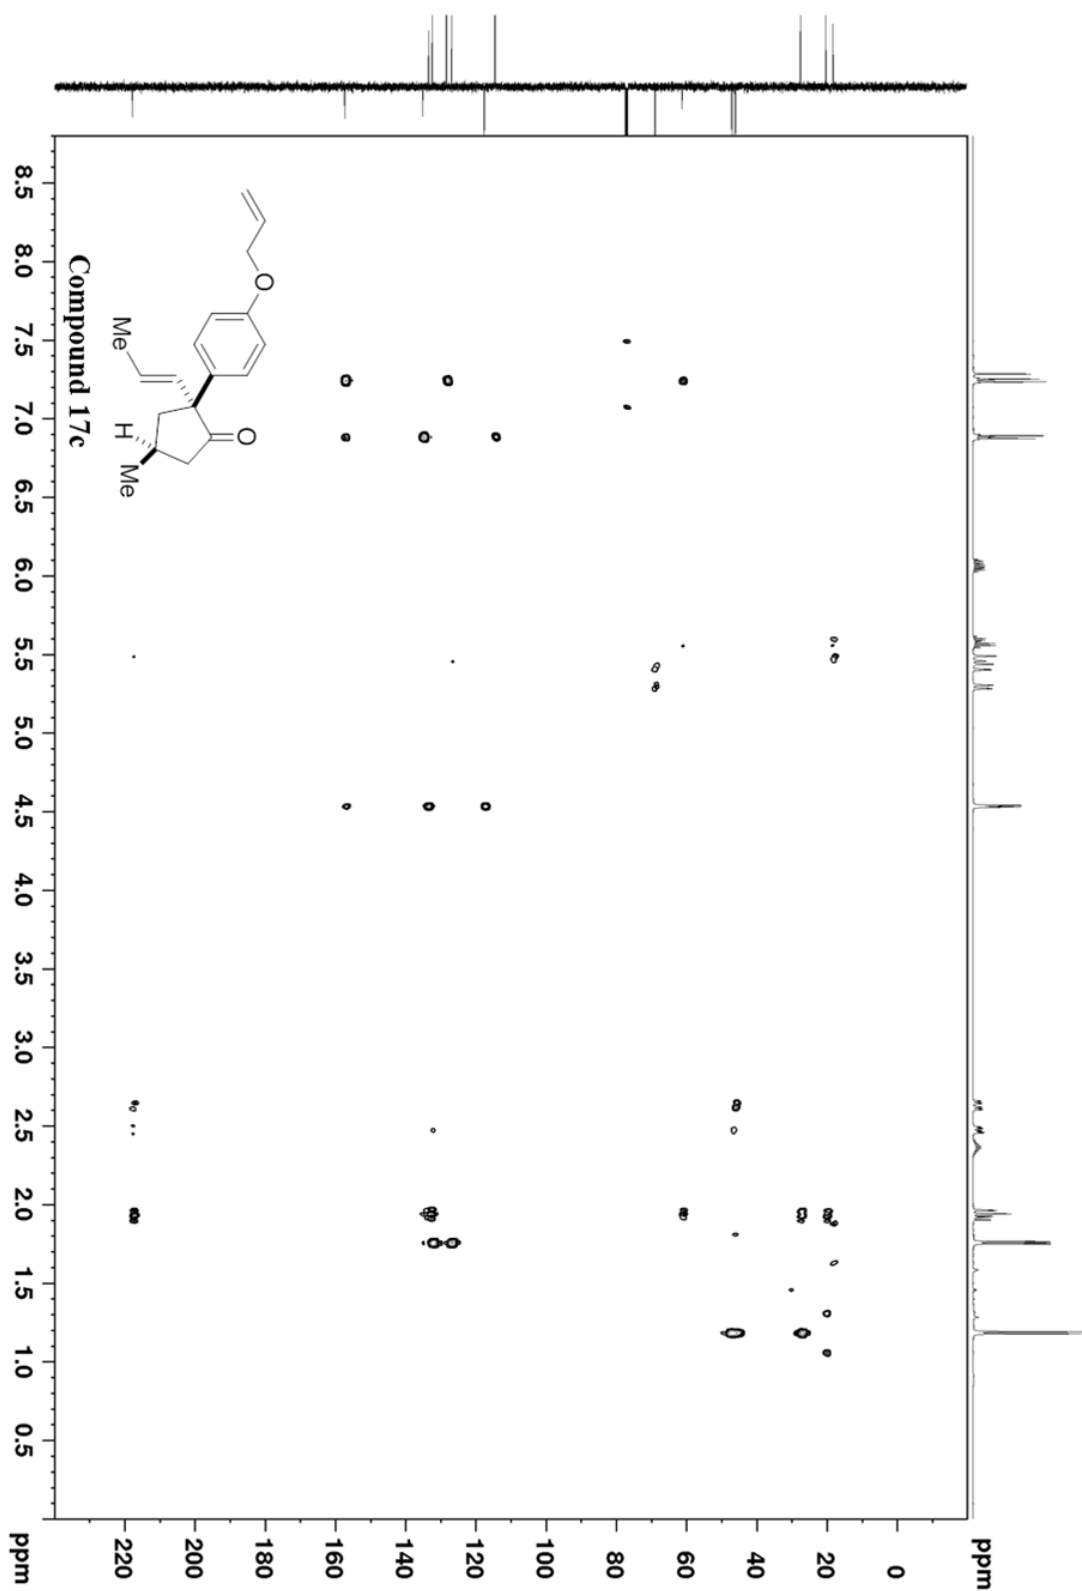



# HMBC

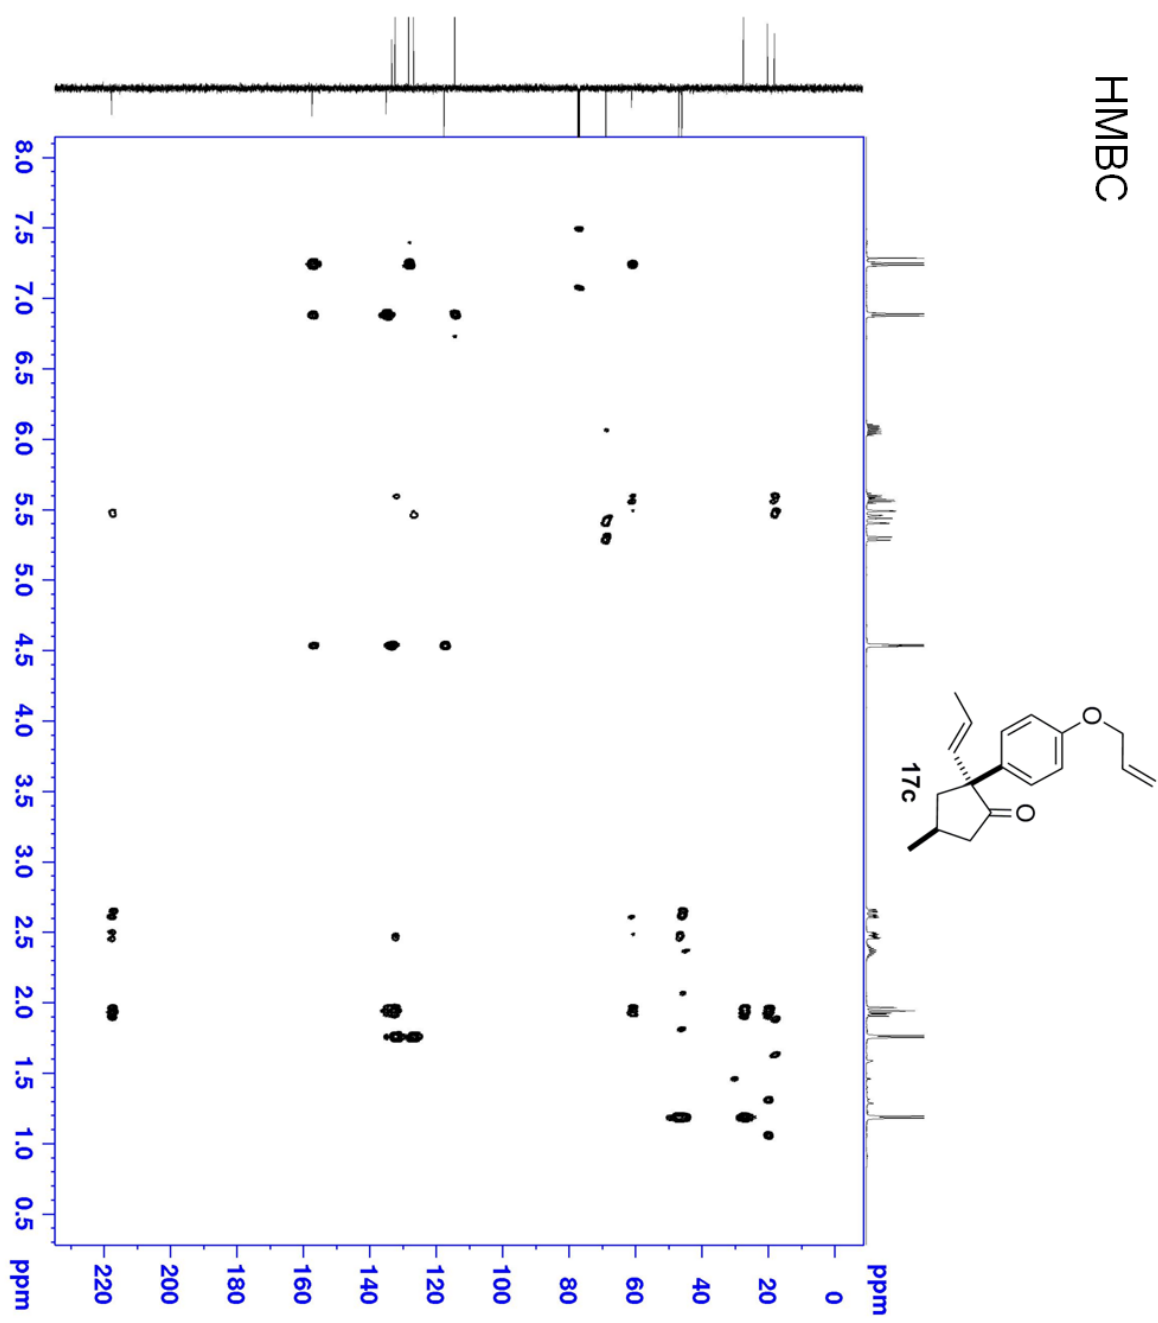

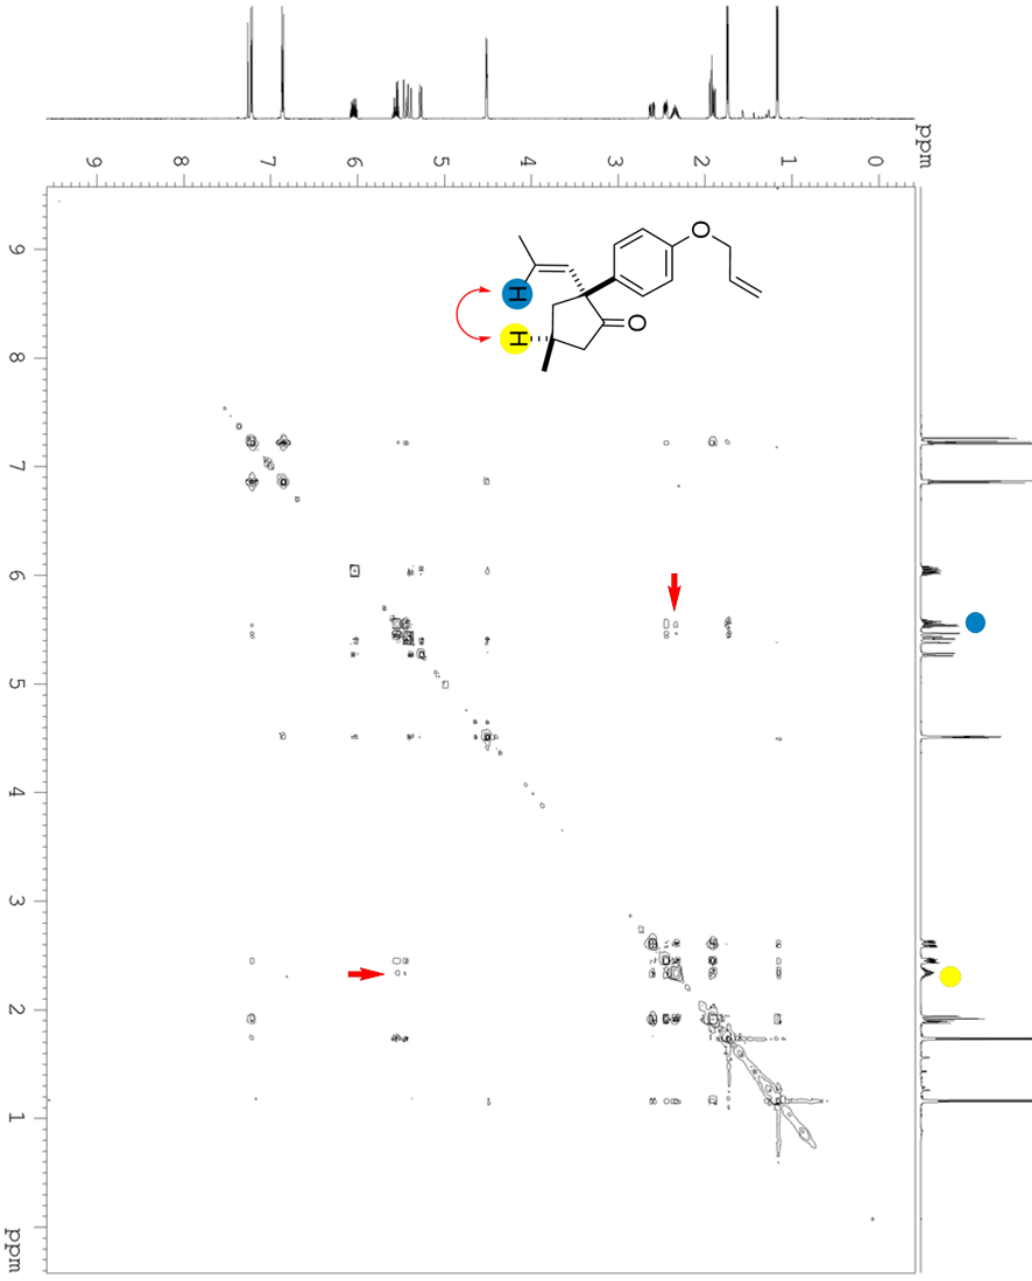

OVERLOAD DATA PARAMETERS  
 EXPNO 2  
 F2 - Acquisition Parameters  
 Date\_ 20161003  
 Time 13:52:00  
 INSTRUM spect  
 PROBRG1 zgpg30  
 PULPROG zgpg30  
 SOLVENT cdcl3  
 NS 16  
 DS 4  
 SWH 13000.000 Hz  
 FWH 254.614100 Hz  
 AQ 0.23181800 sec  
 RG 327.500  
 DQ 150.4500000 sec  
 EQ 1.000000000  
 F2 298.15 K  
 T2 0.010000000 sec  
 SFO 101.6253000 MHz  
 SI 2  
 SF 201.2506000 MHz  
 SOLV 0.000000000 sec  
 SI 4  
 SF 101.6253000 MHz  
 ===== CHANNEL f1 =====  
 NUC1 13C  
 P1 19.45000000 sec  
 PL1 0.00000000 dB  
 F2 101.6253000 MHz  
 ===== CHANNEL f2 =====  
 NUC2 1H  
 P2 12.00000000 sec  
 PL2 0.00000000 dB  
 F2 500.13610120 MHz  
 =====  
 GRANTU11 20071110 1  
 P1 - Acquisition Parameters  
 Date\_ 20161003  
 Time 13:52:00  
 INSTRUM spect  
 PROBRG1 zgpg30  
 PULPROG zgpg30  
 SOLVENT cdcl3  
 NS 16  
 DS 4  
 SWH 13000.000 Hz  
 FWH 254.614100 Hz  
 AQ 0.23181800 sec  
 RG 327.500  
 DQ 150.4500000 sec  
 EQ 1.000000000  
 F2 298.15 K  
 T2 0.010000000 sec  
 SFO 101.6253000 MHz  
 SI 2  
 SF 201.2506000 MHz  
 SOLV 0.000000000 sec  
 SI 4  
 SF 101.6253000 MHz  
 ===== CHANNEL f1 =====  
 NUC1 13C  
 P1 19.45000000 sec  
 PL1 0.00000000 dB  
 F2 101.6253000 MHz  
 ===== CHANNEL f2 =====  
 NUC2 1H  
 P2 12.00000000 sec  
 PL2 0.00000000 dB  
 F2 500.13610120 MHz  
 =====  
 P1 - Processing parameters  
 SI 327.5  
 SF 201.2506000 MHz  
 DS 4  
 SWH 13000.000000 MHz  
 FWH 254.61410000 MHz  
 AQ 0.2318180000 sec  
 RG 327.50000000  
 DQ 150.45000000 sec  
 EQ 1.0000000000  
 F2 298.15000000 K  
 T2 0.0100000000 sec  
 SFO 101.62530000 MHz  
 SI 2  
 SF 201.25060000 MHz  
 SOLV 0.0000000000 sec  
 SI 4  
 SF 101.62530000 MHz

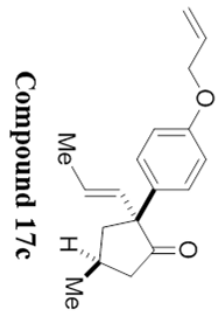

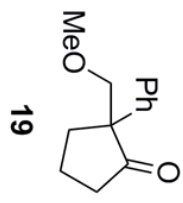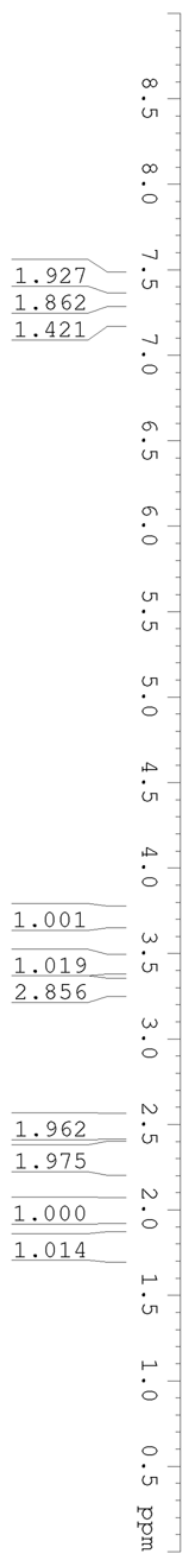

```

NAME: 19a1_PhenylMeO
EXPNO: 1
PROCNO: 1
F2 - Acquisition Parameters
Date_ 20140814
Time 14:48
PROBHD 5 mm PABBO 5
PULPROG zgpg30
TD 65536
AQ 4.0000000
RG 4096
SF 500.136061
FIDRES 0.14
AQRES 1.0
SFO 500.136061
NUC1 13C
NUC2 1H
PC 1.0000000
RG2 327.5
SI 327.5
TE 300.2
TD0 1.0000000
===== CHANNEL f1 =====
NUC1 13C
PULPROG zgpg30
PC 1.0000000
===== CHANNEL f2 =====
NUC1 1H
PC 1.0000000
===== CHANNEL f3 =====
NAME: 19a1_PhenylMeO
EXPNO: 1
PROCNO: 1
F2 - Acquisition Parameters
Date_ 20140814
Time 14:48
PROBHD 5 mm PABBO 5
PULPROG zgpg30
TD 65536
AQ 4.0000000
RG 4096
SF 500.136061
FIDRES 0.14
AQRES 1.0
SFO 500.136061
NUC1 13C
NUC2 1H
PC 1.0000000
RG2 327.5
SI 327.5
TE 300.2
TD0 1.0000000
===== CHANNEL f1 =====
NUC1 13C
PULPROG zgpg30
PC 1.0000000
===== CHANNEL f2 =====
NUC1 1H
PC 1.0000000
===== CHANNEL f3 =====

```



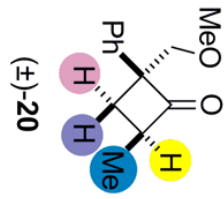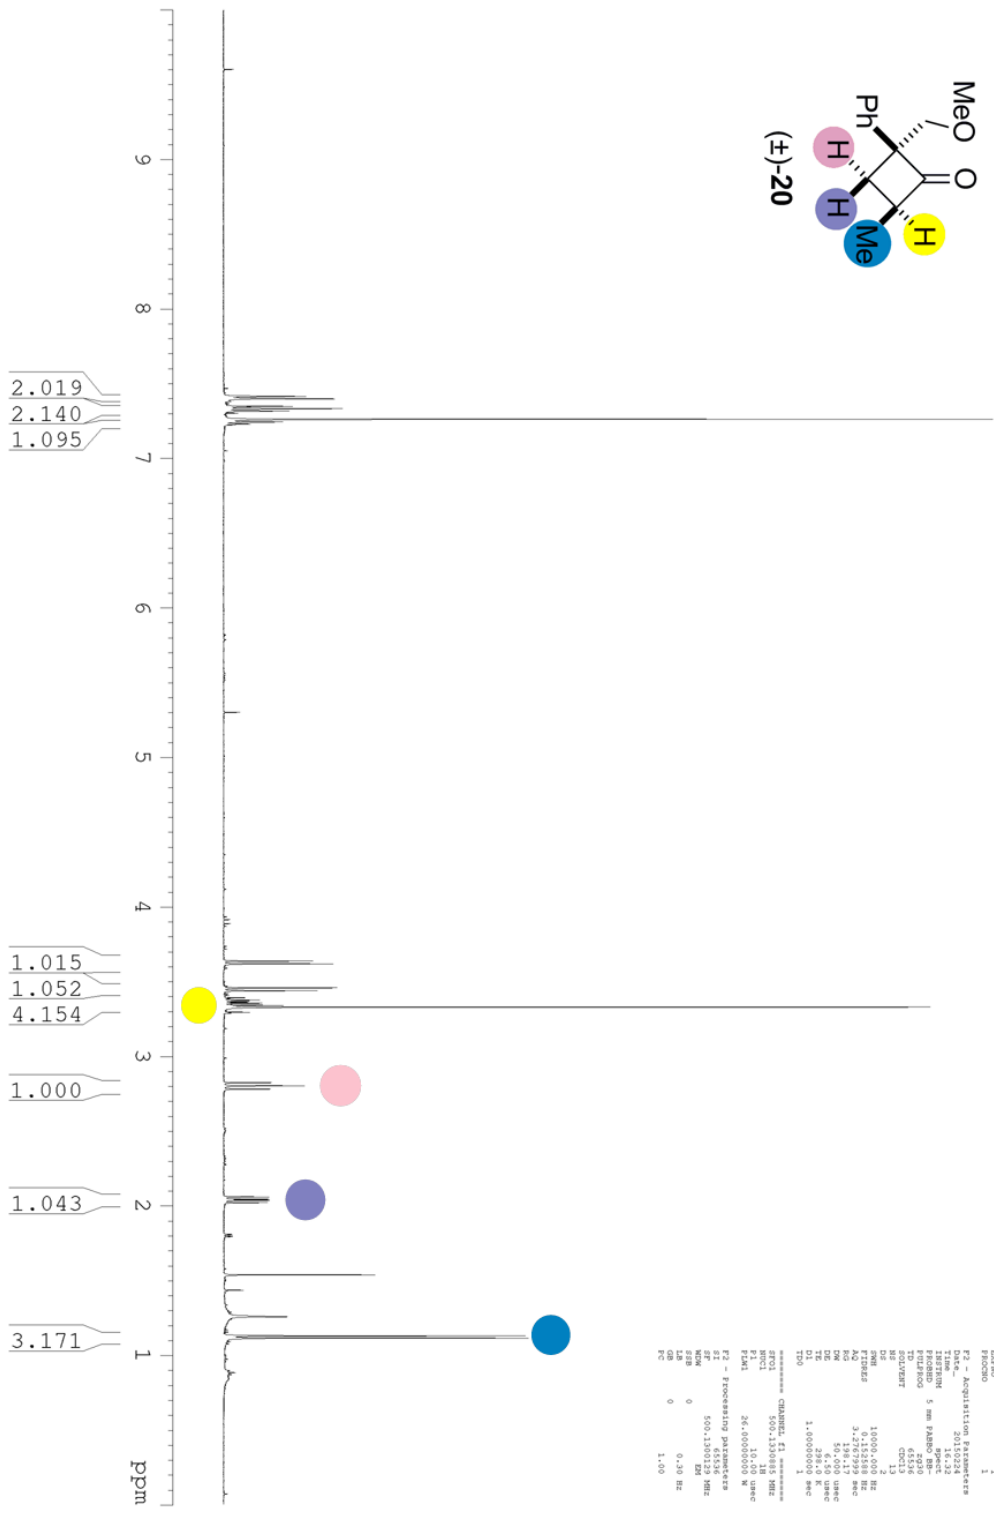

Output Data Parameters  
 ===== CHANNEL F1 =====  
 FREQ1 500.1300123 MHz  
 P1 10.00 uWatt  
 P1A1 24.00000000 M  
 F2 - Acquisition Parameters  
 Date\_ 01/24/2012  
 Time 16:32  
 PROBHD 5 mm BBOBO BB-  
 TD 65536  
 FIDPROC 45136  
 NS 2048  
 DS 2  
 SWH 13000.000 Hz  
 FREQ2 0.1528288 Hz  
 No 1894173  
 FIDRES 3.2786717 sec  
 SFO 500.1300123 MHz  
 DM 50.000 uWatt  
 TE 298.0 K  
 DE 1.00000000  
 TD1 1.00000000  
 ===== CHANNEL F2 =====  
 FREQ2 500.1300123 MHz  
 P2 10.00 uWatt  
 P2A1 24.00000000 M  
 F2 - Processing parameters  
 SI 32768  
 SF 500.1300123 MHz  
 SFB 0 Hz  
 GB 0 Hz  
 PC 0.430 Hz  
 MC 1.00

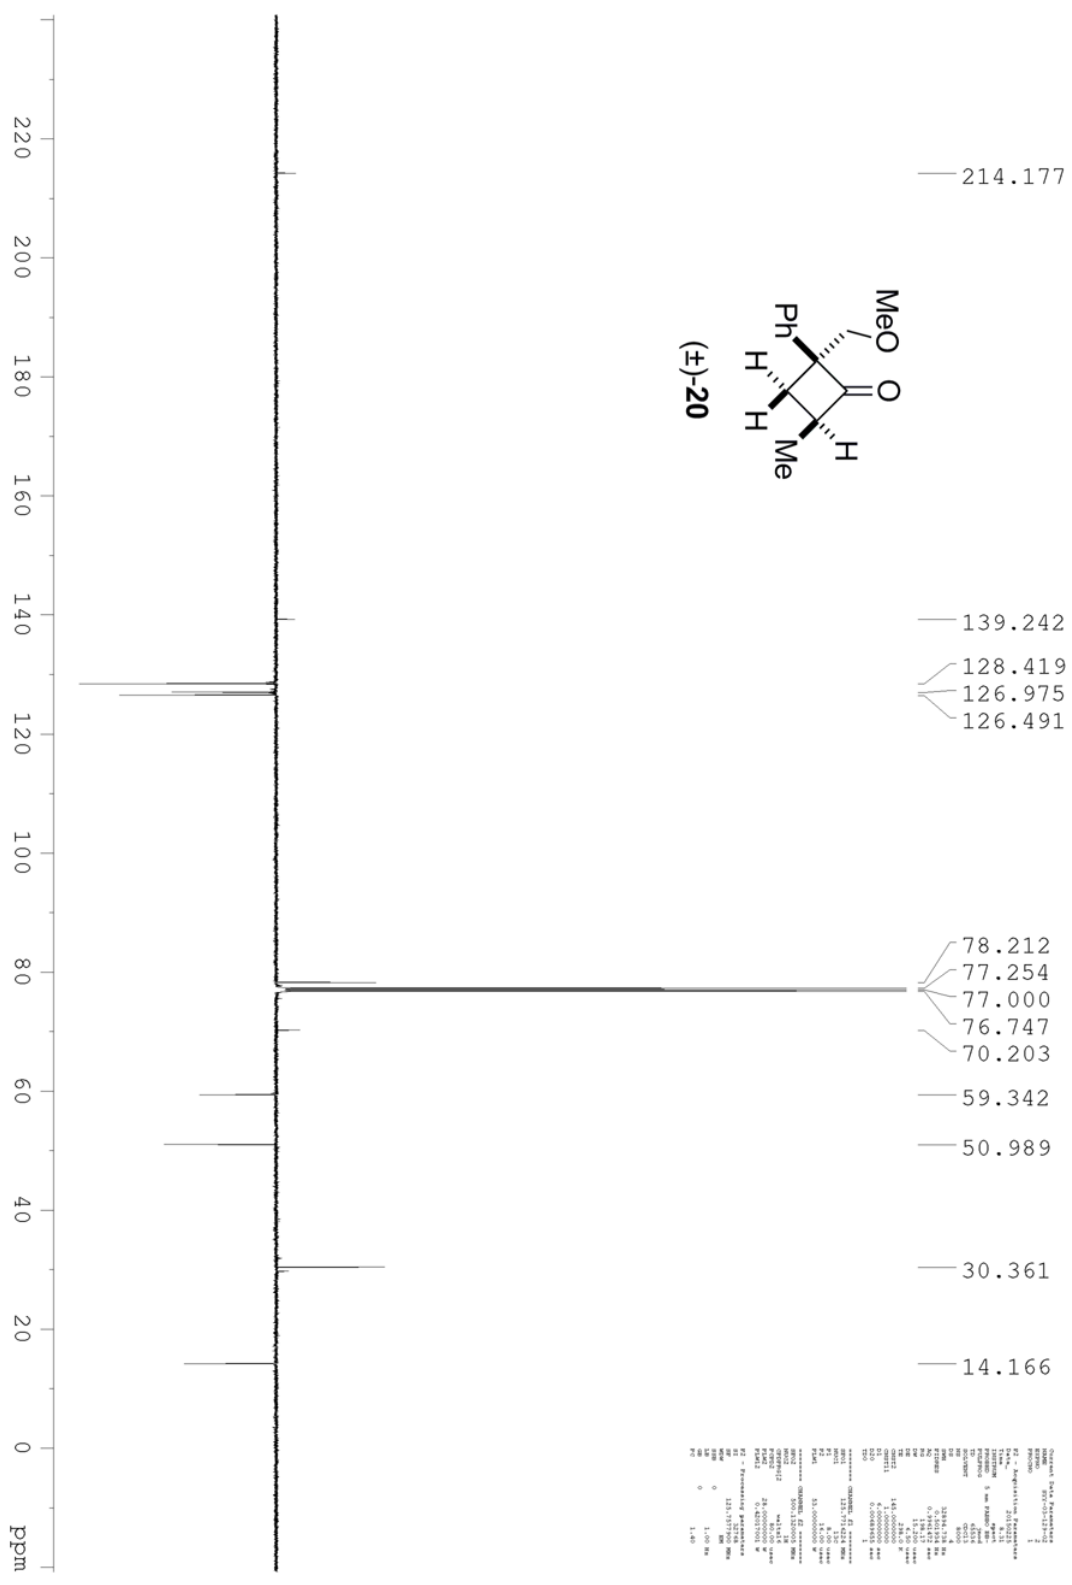

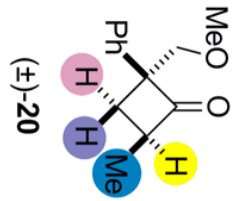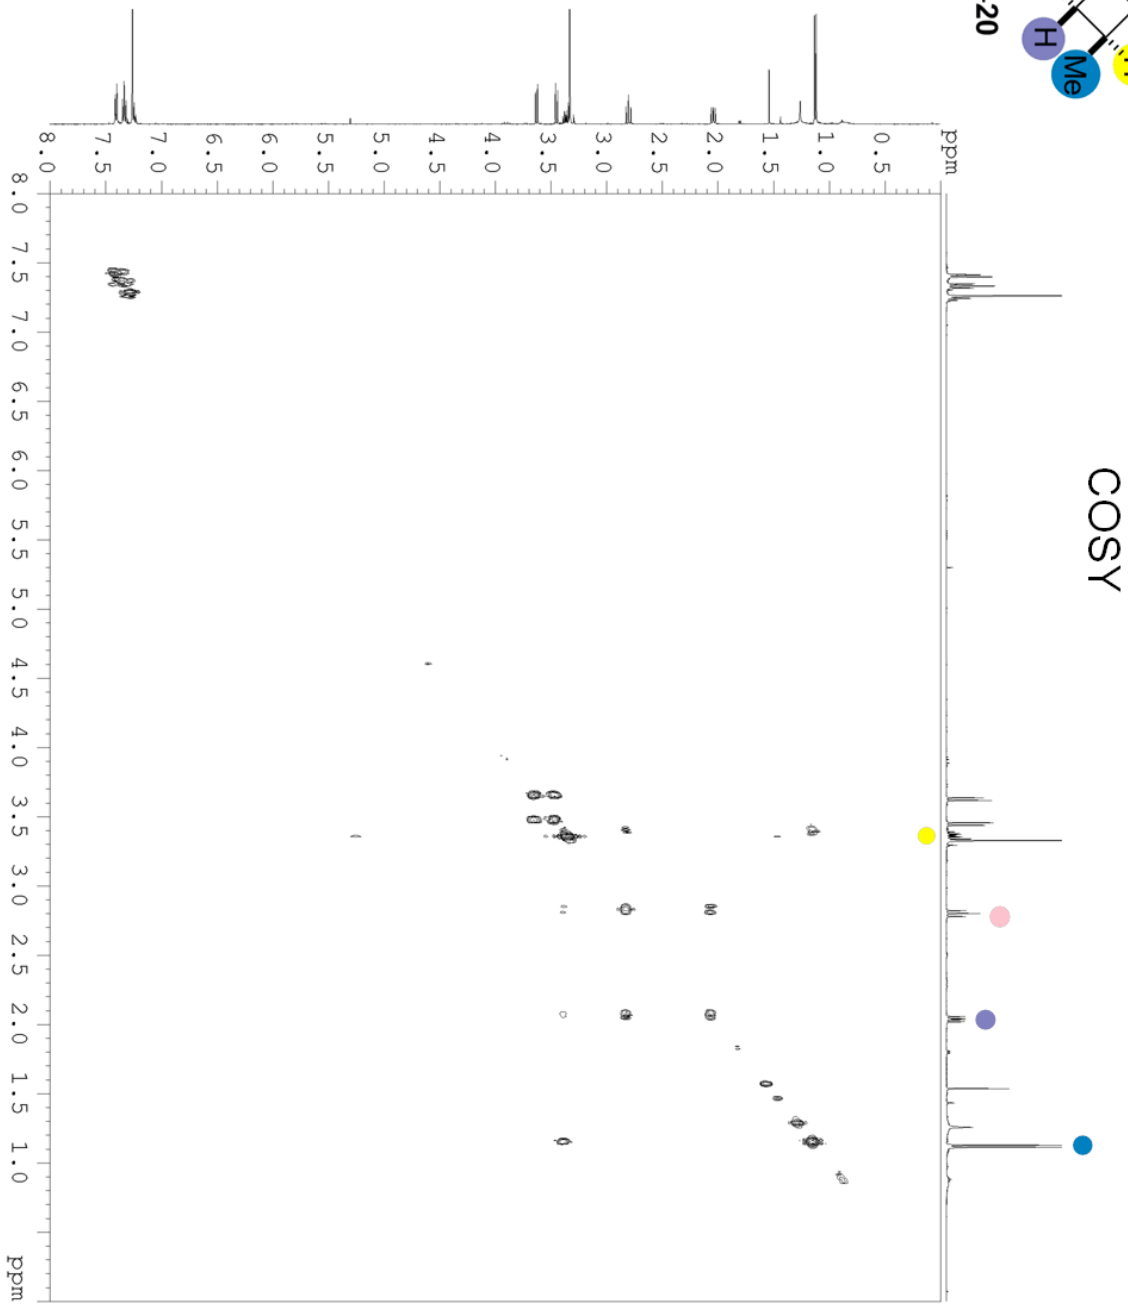

Current Data Parameters  
 NAME: 37Y-03-129-02  
 PROBNM: 1  
 PROCNO: 1  
 P2 - Acquisition Parameters  
 Date\_Time: 20150225  
 Time: 17.49  
 PROBNM: 5 mm BBAF0 BB-  
 PULPROG: cevyzgpg  
 SOLVENT: CDCl3  
 NS: 1  
 DS: 1  
 SWH: 5000.000 Hz  
 F2: 244.806 Hz  
 F1: 198.17 Hz  
 RQ: 100.000 usec  
 DM: 100.000 usec  
 DE: 0.00000000 usec  
 TE: 298.2 K  
 D0: 0.00000000 sec  
 D1: 0.00000480 sec  
 D13: 0.00000000 sec  
 D10: 0.00000000 sec  
 ===== CHANNEL f1 =====  
 SFO1 500.132026 MHz  
 NUC1 13C  
 P1 10.00 usec  
 PL1 26.000000000 W  
 ===== GRADIENT CHANNEL =====  
 GPMX1(1) SMO10.100  
 P16 1000.00 usec  
 P16 26.000000000 W  
 P1 - Acquisition parameters  
 SFO1 500.1320 MHz  
 F2 244.806 MHz  
 SM 39.997 Ppm  
 F30K02 QF  
 P2 - Processing parameters  
 SI 32768  
 SF 500.130000 MHz  
 WDW HANNING  
 SSB 0  
 GB 0  
 PC 1.00  
 P1 - Processing parameters  
 SI 32768  
 SF 500.130000 MHz  
 WDW HANNING  
 SSB 0  
 GB 0  
 PC 1.00

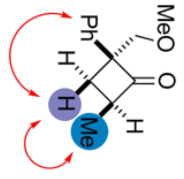

(+)-20  
Key NOESY

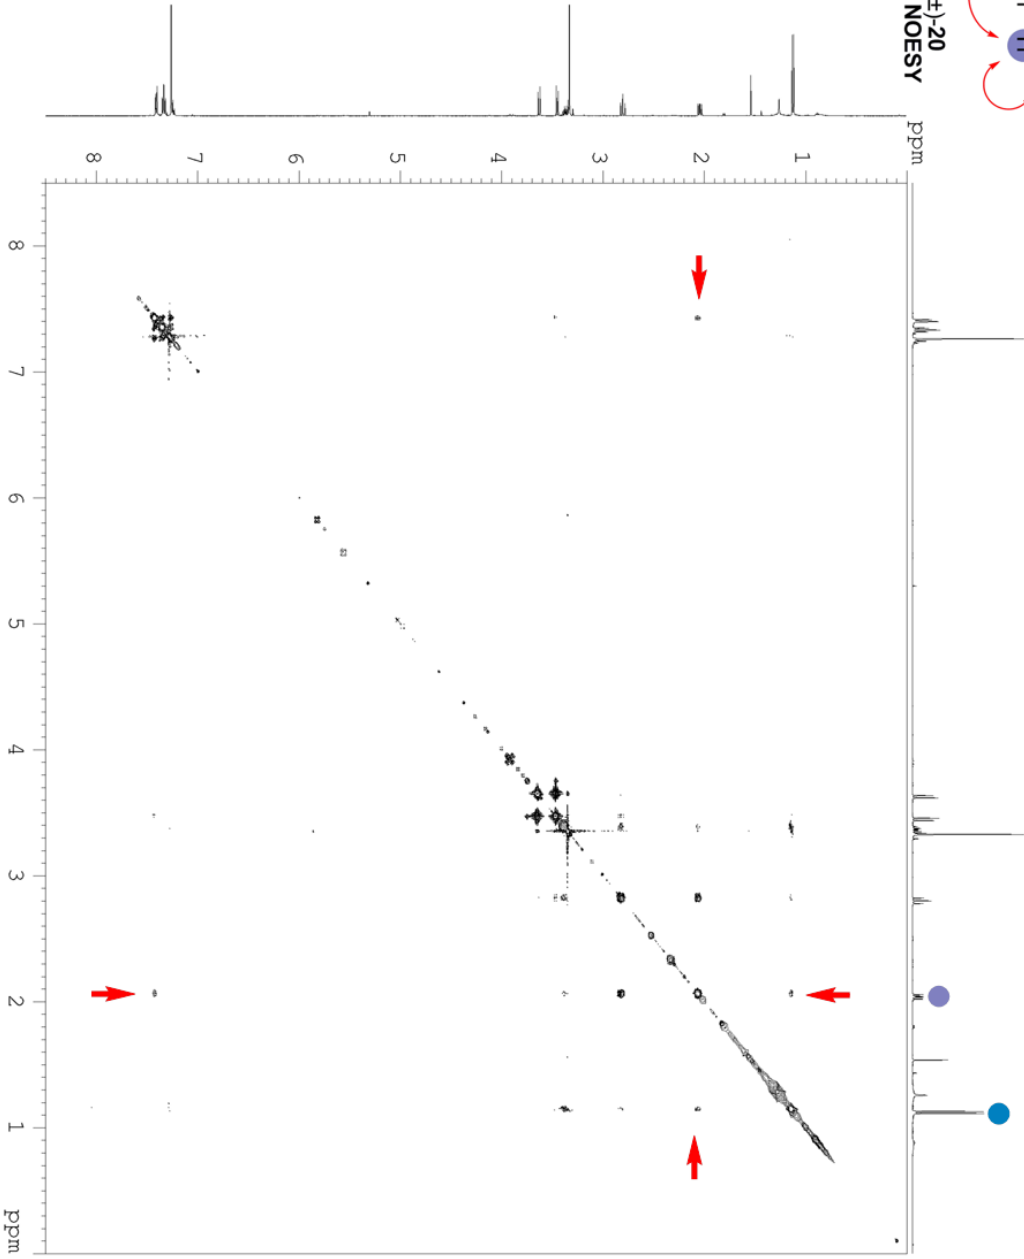

```

Current Data Parameters
NAME      577-05-129-02
EXPNO    5
PROCNO   1
-----
F2 - Acquisition parameters
Date_     20110818
Time      18:35
PROBHD    5 mm PABBO
PULPROG   nonezgphn
SOLVENT   cdcl3
NS        4
DS        3
SWH       5000.000 Hz
FIDRES   0.244100 Hz
AQ        0.244444 sec
RG        198.17
DM        100.450 umsec
DE        0.0000000
TE        298.0 K
D1        0.30000000 sec
D11       2.00000000 sec
D12       0.00000000 sec
D13       0.00000000 sec
D14       0.00000000 sec
D15       0.00000000 sec
D16       0.00000000 sec
D17       0.00000000 sec
D18       0.00000000 sec
D19       0.00000000 sec
----- CHANNEL f1 -----
SFO1     500.132023 MHz
P1        10.00 umsec
P2        30.00 umsec
P3        30.00 umsec
P4        26.00000000 M
----- CHANNEL f2 -----
SFO2     500.132023 MHz
P1        10.00 umsec
P2        30.00 umsec
P3        30.00 umsec
P4        26.00000000 M
-----
===== CHANNEL f1 =====
NAME      GRADIENT CHANNEL
UNIT      MHz
GR21      300.94000 %
P16       1000.00 umsec
-----
F1 - Acquisition parameters
Date_     20110818
Time      18:35
PROBHD    5 mm PABBO
PULPROG   nonezgphn
SOLVENT   cdcl3
NS        4
DS        3
SWH       5000.000 Hz
FIDRES   0.244100 Hz
AQ        0.244444 sec
RG        198.17
DM        100.450 umsec
DE        0.0000000
TE        298.0 K
D1        0.30000000 sec
D11       2.00000000 sec
D12       0.00000000 sec
D13       0.00000000 sec
D14       0.00000000 sec
D15       0.00000000 sec
D16       0.00000000 sec
D17       0.00000000 sec
D18       0.00000000 sec
D19       0.00000000 sec
----- CHANNEL f2 -----
SFO1     500.132023 MHz
P1        10.00 umsec
P2        30.00 umsec
P3        30.00 umsec
P4        26.00000000 M
-----
===== CHANNEL f2 =====
NAME      GRADIENT CHANNEL
UNIT      MHz
GR21      300.94000 %
P16       1000.00 umsec
-----
F2 - Processing parameters
SI        32
SF        500.1300000 MHz
WDW       EM
SSB       0 Hz
GB        0 Hz
PC        1.00
-----
F1 - Processing parameters
SI        32
SF        500.1300000 MHz
WDW       EM
SSB       0 Hz
GB        0 Hz
PC        1.00

```



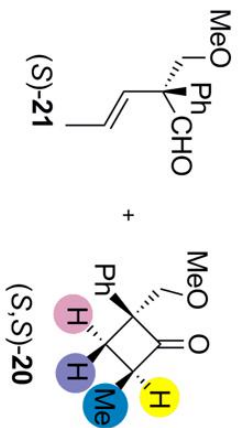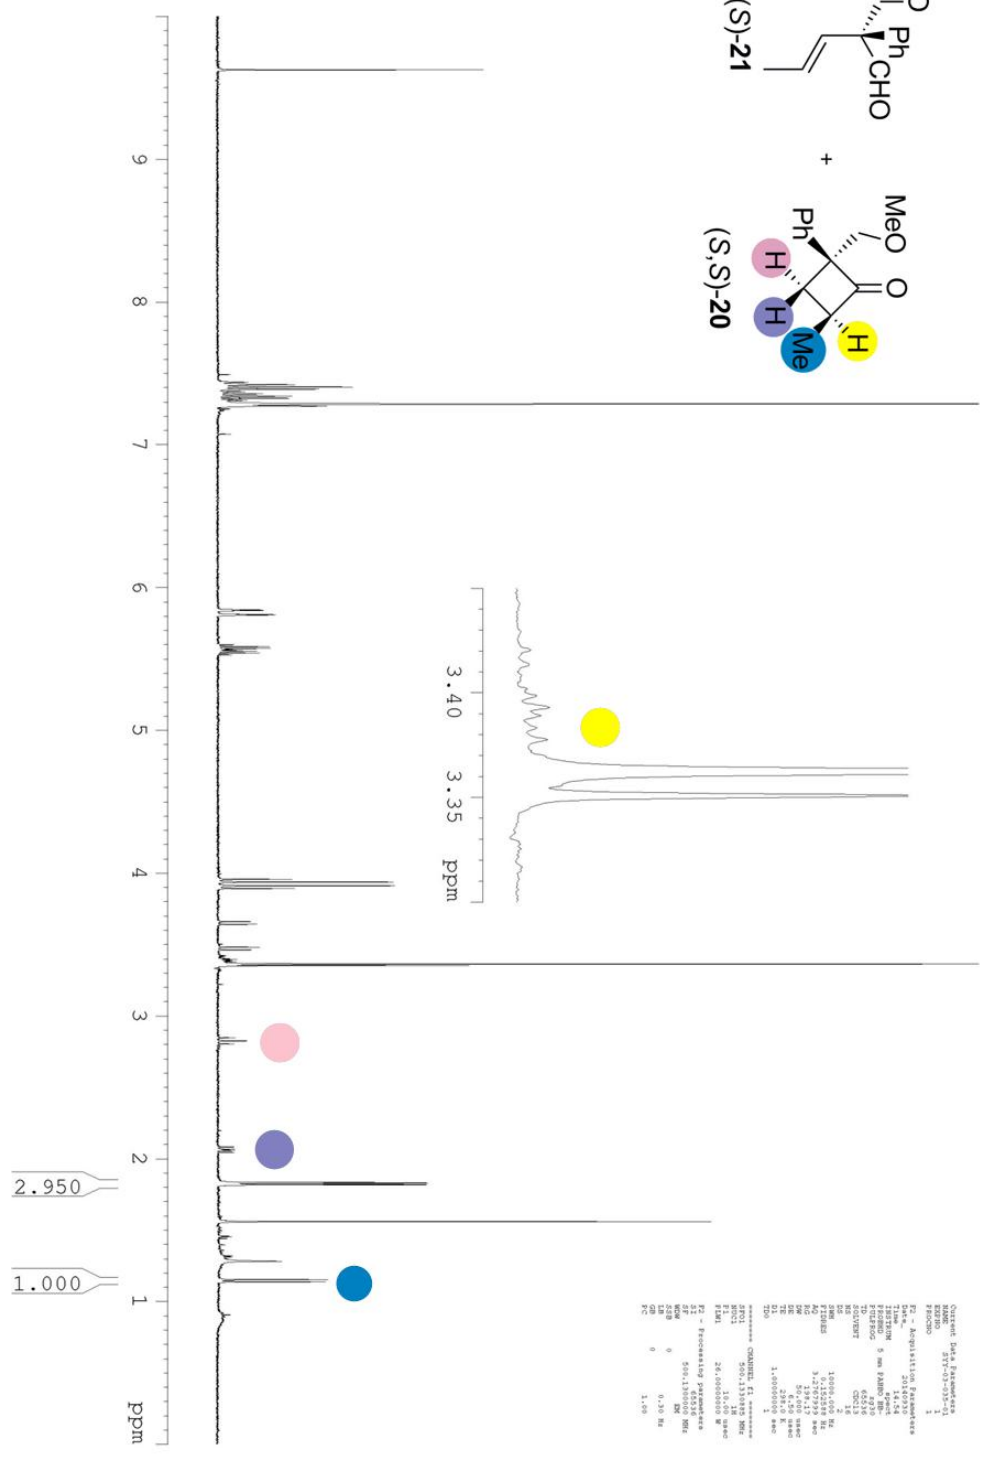

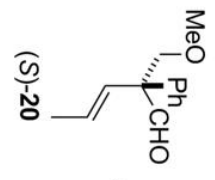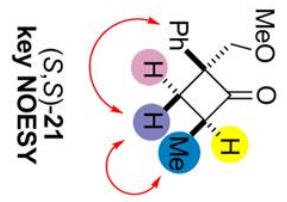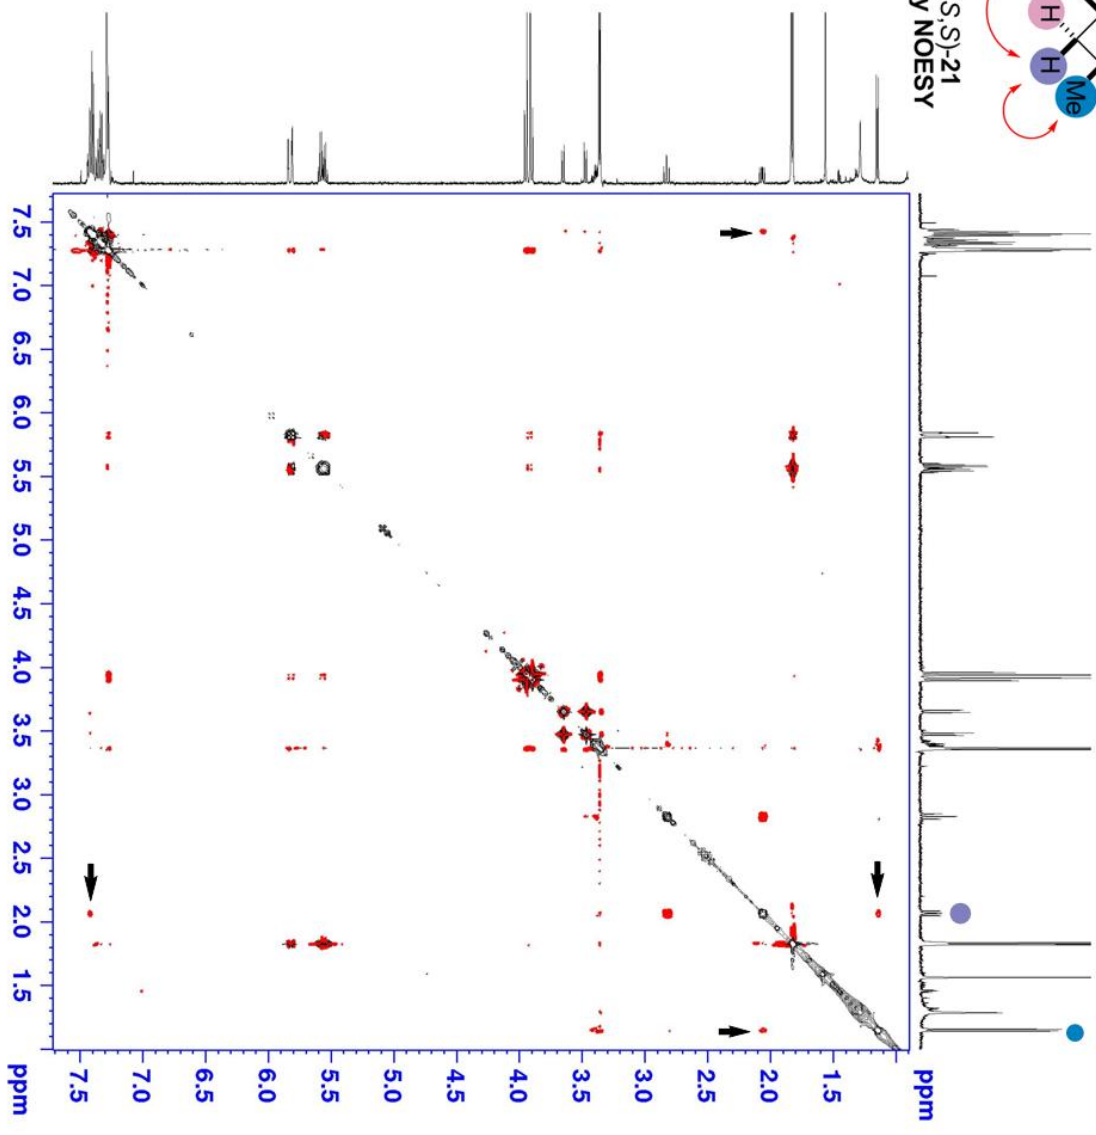

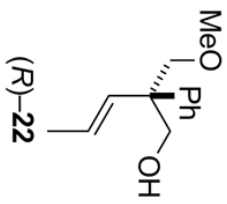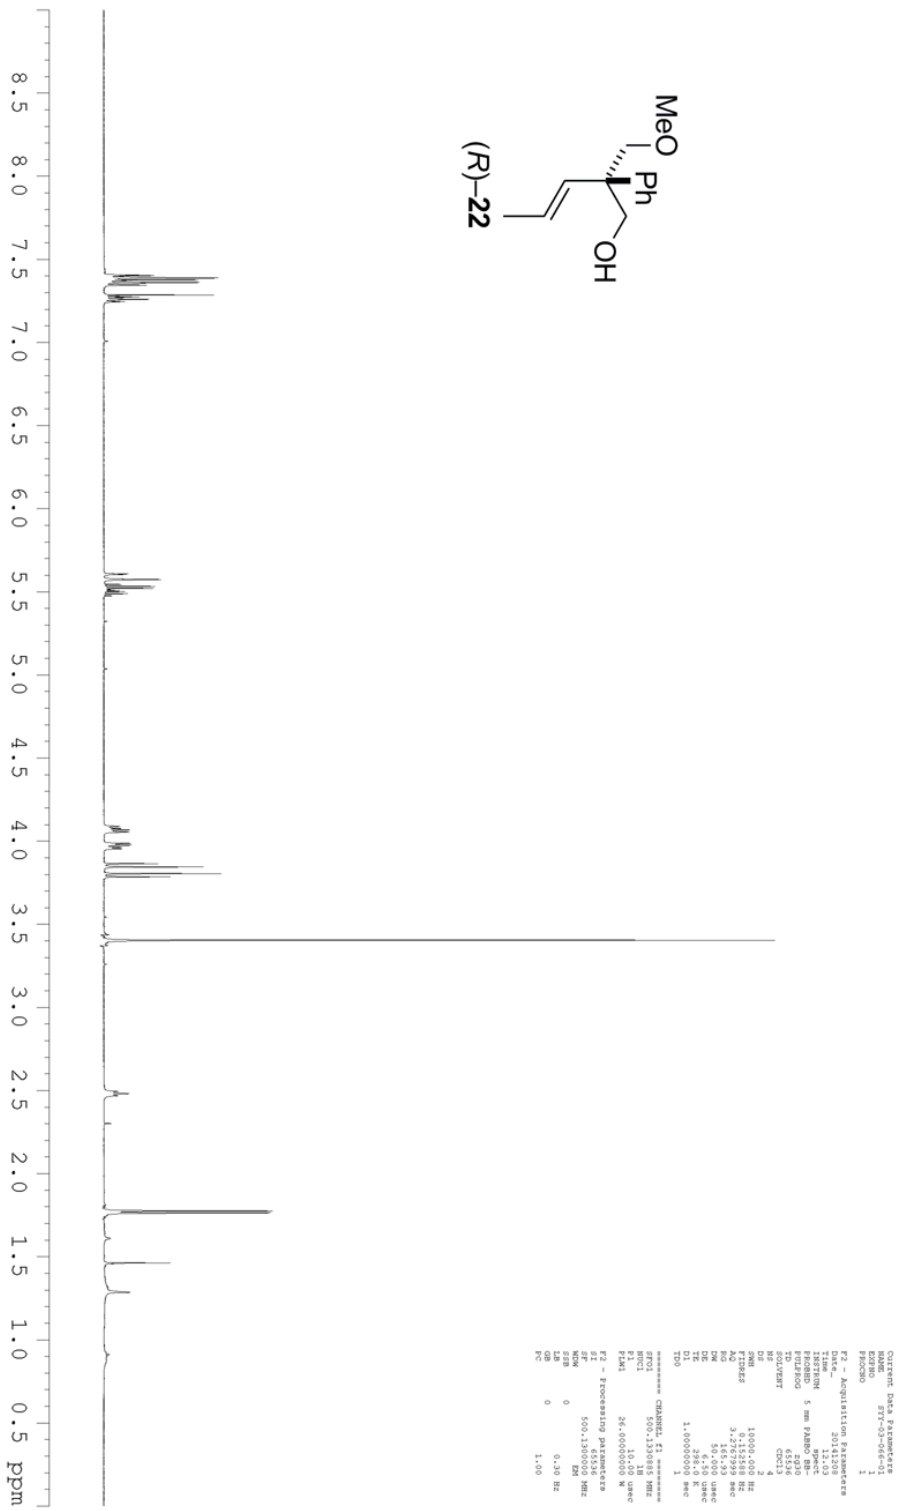



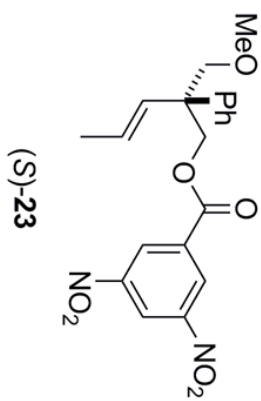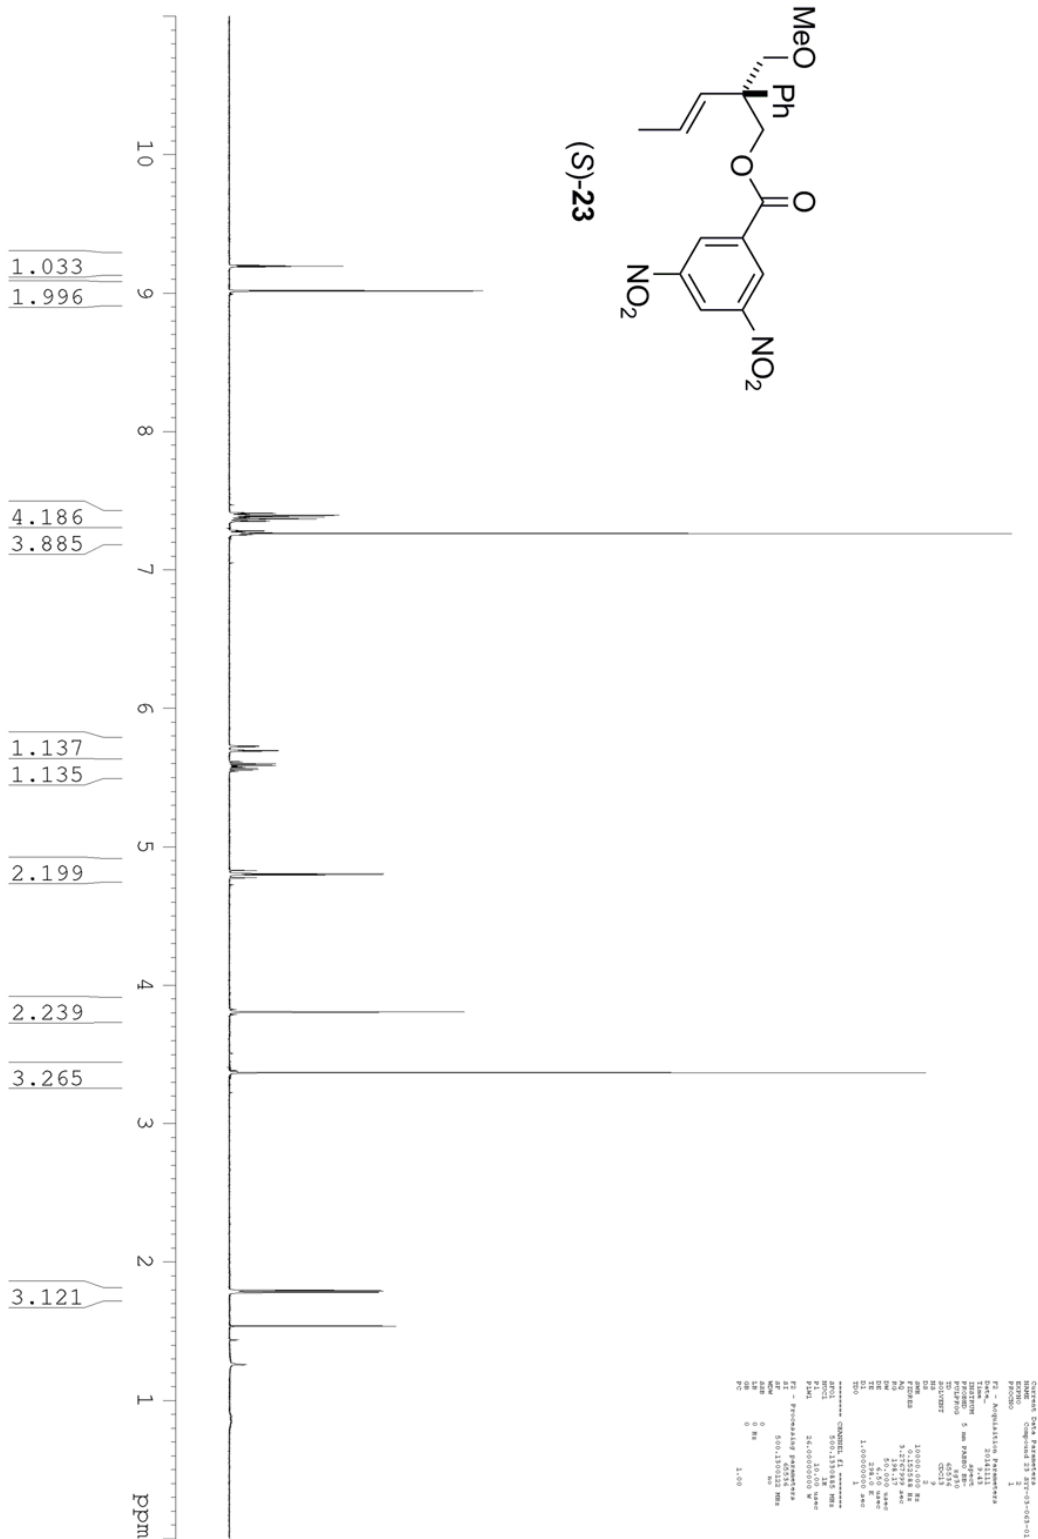



Data File C:\CHEM32\2\DATA\SYIP\SYI-02-070-01.D  
Sample Name: SYI-02-070-01

```
=====  
Acq. Operator   : Stephanie Yip  
Acq. Instrument : Instrument 2           Location : Vial 62  
Injection Date  : 1/24/2014 3:04:09 PM  
Inj Volume     : 10 µl  
Acq. Method    : C:\CHEM32\2\METHODS\SYI CYCLISATION METHOD.M  
Last changed   : 1/24/2014 3:23:00 PM by Stephanie Yip  
               (modified after loading)  
Analysis Method : C:\CHEM32\2\METHODS\CR AJC ON.M  
Last changed   : 1/24/2014 2:29:55 PM by Chris Riley  
               (modified after loading)  
Sample Info    : AD-H 99:1 hex:IPA 1ml/min  
               cyclopentanone racemic
```

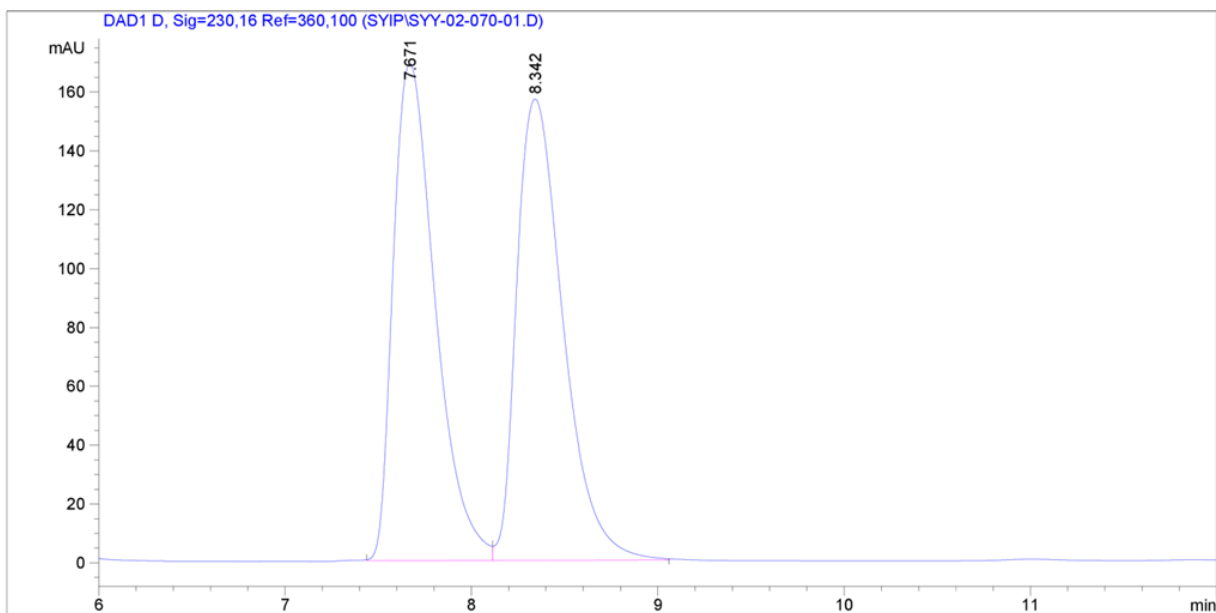

=====  
Area Percent Report  
=====

Sorted By : Signal  
Multiplier : 1.0000  
Dilution : 1.0000  
Use Multiplier & Dilution Factor with ISTDs

Signal 1: DAD1 D, Sig=230,16 Ref=360,100

| Peak # | RetTime [min] | Type | Width [min] | Area [mAU*s] | Height [mAU] | Area %  |
|--------|---------------|------|-------------|--------------|--------------|---------|
| 1      | 7.671         | BV   | 0.2449      | 2649.61450   | 169.00085    | 49.4277 |
| 2      | 8.342         | VB   | 0.2697      | 2710.96729   | 156.82320    | 50.5723 |

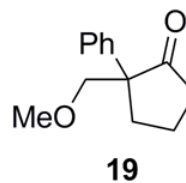

```

=====
Acq. Operator   : Stephanie Yip
Acq. Instrument : Instrument 2           Location : Vial 71
Injection Date  : 1/24/2014 3:12:05 PM
                                           Inj Volume : 10 µl
Acq. Method     : C:\CHEM32\2\METHODS\SYI CYCLISATION METHOD.M
Last changed    : 1/24/2014 3:12:10 PM by Stephanie Yip
                  (modified after loading)
Analysis Method : C:\CHEM32\2\METHODS\SMK AJC OXIDATION PAO.M
Last changed    : 1/24/2014 3:23:44 PM by Stephanie Yip
                  (modified after loading)
Sample Info     : 99% hexane, 1% ipa, 1ml/min, AD-H column
                  rxn at RT, F2.
=====
  
```

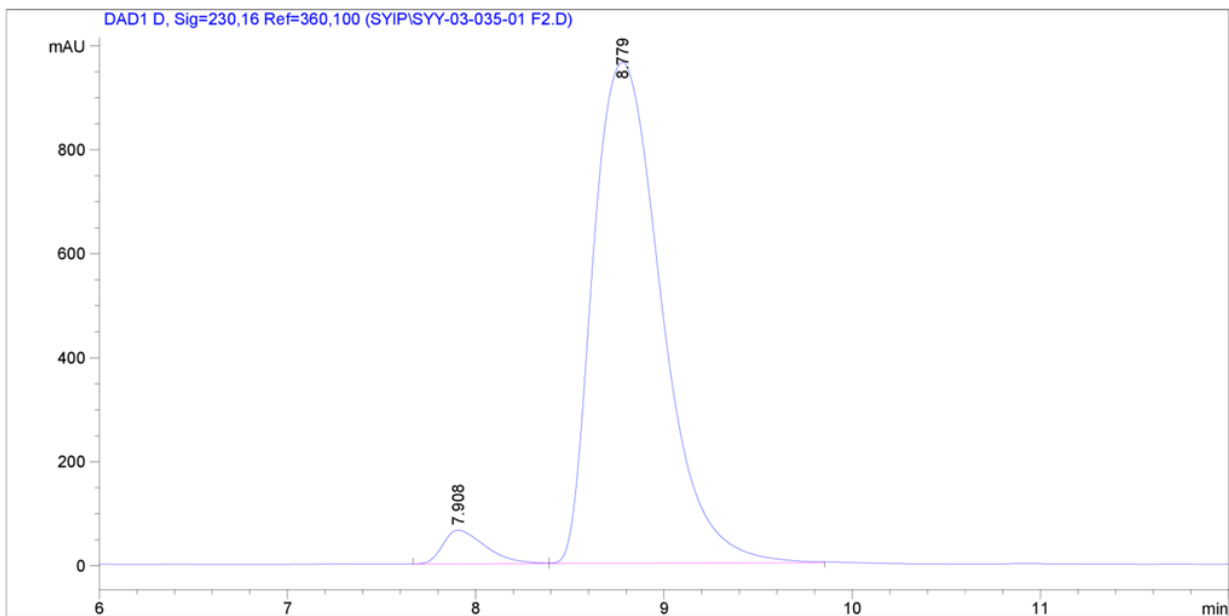

=====  
 Area Percent Report  
 =====

```

Sorted By      :      Signal
Multiplier     :      1.0000
Dilution       :      1.0000
Use Multiplier & Dilution Factor with ISTDs
  
```

Signal 1: DAD1 D, Sig=230,16 Ref=360,100

| Peak # | RetTime [min] | Type | Width [min] | Area [mAU*s] | Height [mAU] | Area %  |
|--------|---------------|------|-------------|--------------|--------------|---------|
| 1      | 7.908         | BV   | 0.2427      | 1015.39496   | 64.84653     | 4.0284  |
| 2      | 8.779         | VB   | 0.3990      | 2.41904e4    | 963.25464    | 95.9716 |

Totals :                    2.52058e4  1028.10117

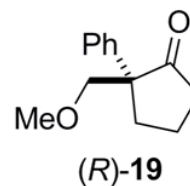



```

=====
Acq. Operator   : Stephanie Yip
Acq. Instrument : Instrument 2
Injection Date  : 1/24/2014 2:57:00 PM
Location        : Vial 12
Inj Volume     : 20 µl
Acq. Method    : C:\CHEM32\2\METHODS\SMK AJC OXIDATION PAO.M
Last changed   : 1/24/2014 3:15:19 PM by Stephanie Yip
                (modified after loading)
Analysis Method: C:\CHEM32\2\METHODS\SMK AJC OXIDATION PAO.M
Last changed   : 1/24/2014 2:50:09 PM by Stephanie Yip
                (modified after loading)
Sample Info    : 98:2% Hex:IPA, 1mL/min, AD-H.
                Racemic alcohol
  
```

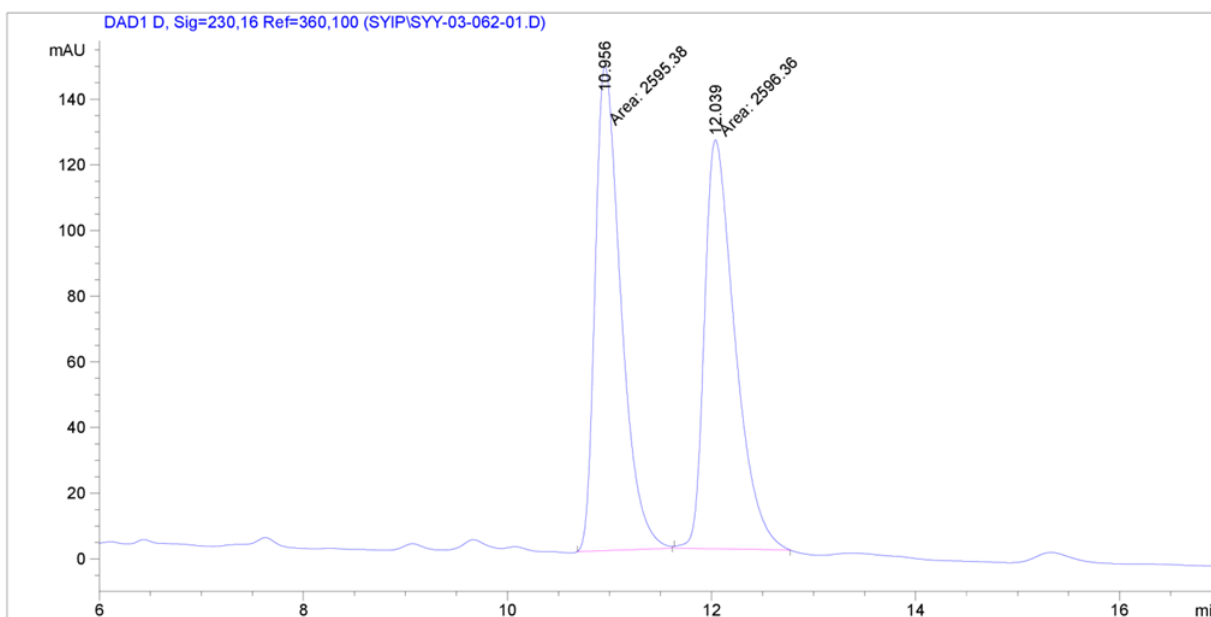

Area Percent Report

```

Sorted By      : Signal
Multiplier    : 1.0000
Dilution      : 1.0000
Use Multiplier & Dilution Factor with ISTDs
  
```

Signal 1: DAD1 D, Sig=230,16 Ref=360,100

| Peak # | RetTime [min] | Type | Width [min] | Area [mAU*s] | Height [mAU] | Area %  |
|--------|---------------|------|-------------|--------------|--------------|---------|
| 1      | 10.956        | MM   | 0.2927      | 2595.37598   | 147.77237    | 49.9905 |
| 2      | 12.039        | MM   | 0.3472      | 2596.36255   | 124.61640    | 50.0095 |

Totals : 5191.73853 272.38877

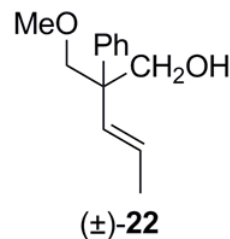

```

=====
Acq. Operator   : Stephanie Yip
Acq. Instrument : Instrument 2
Injection Date  : 1/24/2014 2:28:41 PM
Location       : Vial 11
Inj Volume     : 20 µl
Acq. Method    : C:\CHEM32\2\METHODS\SMK AJC OXIDATION PAO.M
Last changed   : 1/24/2014 3:15:19 PM by Stephanie Yip
                (modified after loading)
Analysis Method : C:\CHEM32\2\METHODS\CR AJC ON.M
Last changed   : 1/24/2014 3:16:11 PM by Chris Riley
                (modified after loading)
Sample Info    : 98:2% Hex:IPA, 1mL/min, AD-H.
                enantiopure alcohol
  
```

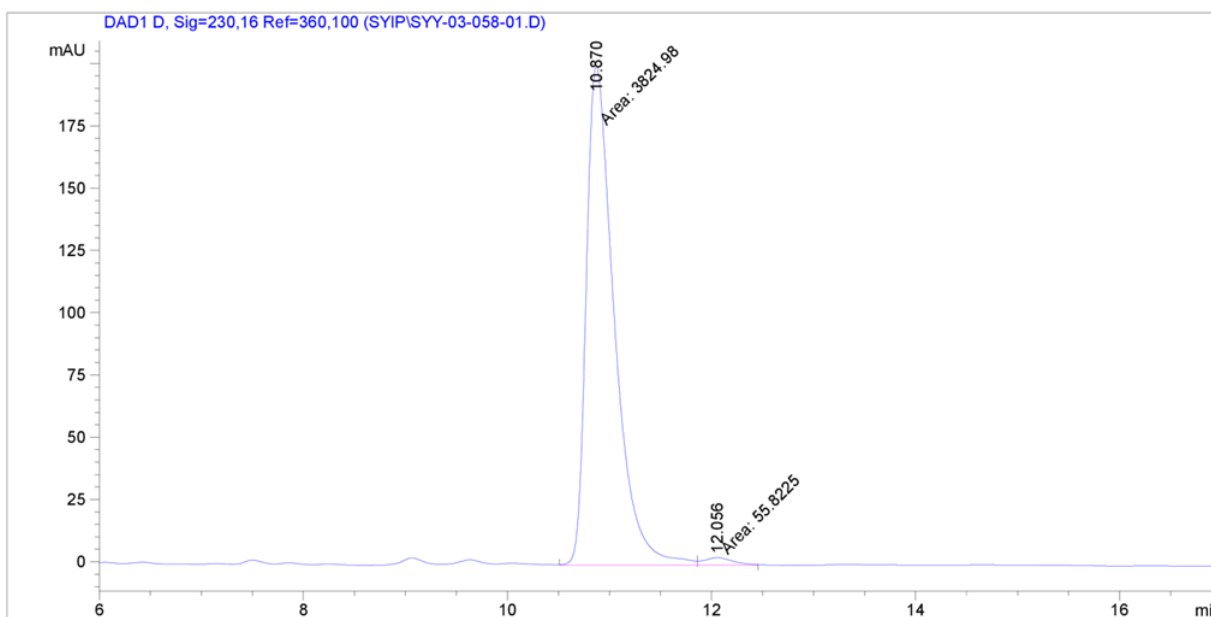

Area Percent Report

```

Sorted By      : Signal
Multiplier     : 1.0000
Dilution       : 1.0000
Use Multiplier & Dilution Factor with ISTDs
  
```

Signal 1: DAD1 D, Sig=230,16 Ref=360,100

| Peak # | RetTime [min] | Type | Width [min] | Area [mAU*s] | Height [mAU] | Area %  |
|--------|---------------|------|-------------|--------------|--------------|---------|
| 1      | 10.870        | MF   | 0.3180      | 3824.98169   | 200.44376    | 98.5616 |
| 2      | 12.056        | FM   | 0.3191      | 55.82255     | 2.91560      | 1.4384  |

Totals : 3880.80424 203.35935

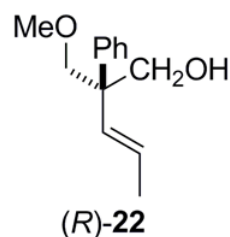

-----  
 Acq. Operator : Steph Yip  
 Acq. Instrument : Instrument 2                      Location : Vial 1  
 Injection Date : 1/23/2015 2:04:08 PM                      Inj Volume : 2 µl  
 Acq. Method : C:\CHEM32\2\METHODS\CR\_AJC\_ON.M  
 Last changed : 1/23/2015 2:34:56 PM by Steph Yip  
                                                                          (modified after loading)  
 Analysis Method : C:\CHEM32\2\METHODS\CR\_AJC\_ON.M  
 Last changed : 1/23/2015 2:22:30 PM by Steph Yip  
                                                                          (modified after loading)  
 Sample Info : OJ-H 94:6 HEX:IPA, 1mL/min.  
                                                                          chiral alcohol  
 -----

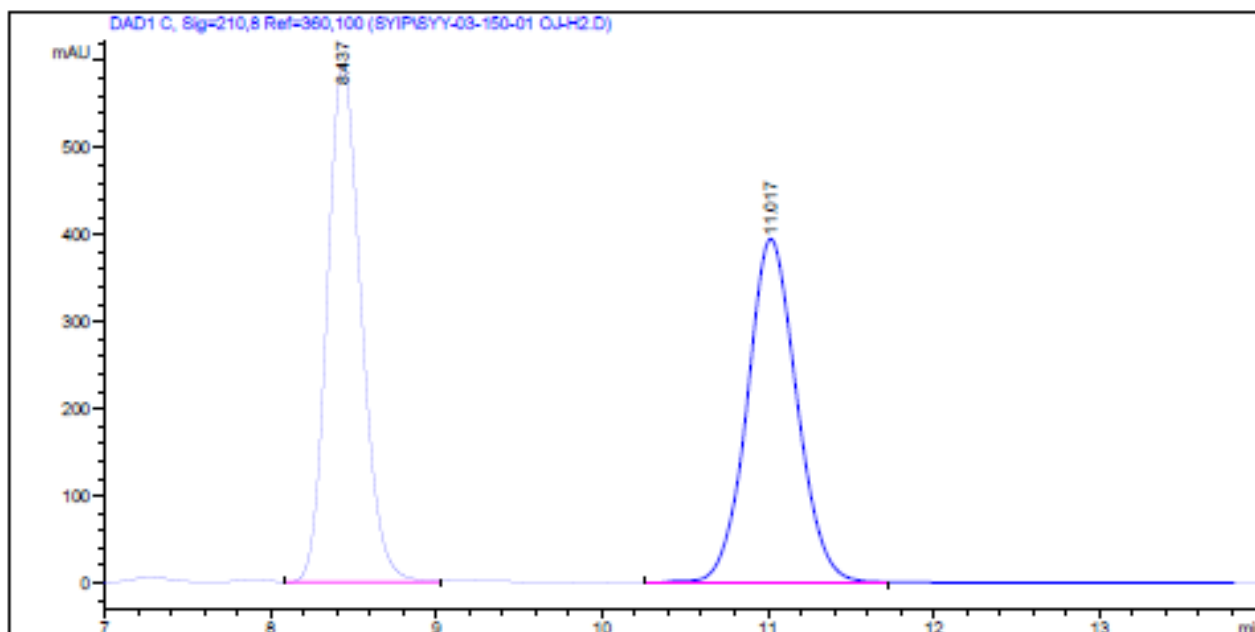

-----  
 Area Percent Report  
 -----

Sorted By : Signal  
 Multiplier : 1.0000  
 Dilution : 1.0000  
 Use Multiplier & Dilution Factor with ISTDs

Signal 1: DAD1 C, Sig=210,8 Ref=360,100

| Peak # | RetTime [min] | Type | Width [min] | Area [mAU*s] | Height [mAU] | Area %  |
|--------|---------------|------|-------------|--------------|--------------|---------|
| 1      | 8.437         | VB   | 0.2230      | 8474.80469   | 592.20422    | 50.8495 |
| 2      | 11.017        | BB   | 0.3180      | 8191.63086   | 394.87689    | 49.1505 |

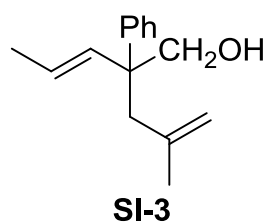

Data File C:\CHEM32\2\DATA\SYIP\SYI-03-150-01 QJ-H2.D  
Sample Name: SYI-03-150-01 QJ-H2

Totals : 1.66664e4 987.08112

-----  
\*\*\* End of Report \*\*\*

Instrument 2 1/23/2015 2:22:50 PM Steph Yip

Page 2 of 2

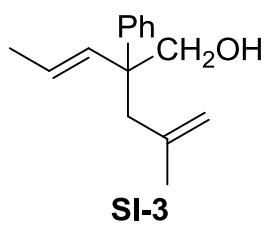

Sample Name: SYIP-03-151-01 OJ-H

-----  
Acq. Operator : Steph Yip  
Acq. Instrument : Instrument 2 Location : Vial 2  
Injection Date : 1/23/2015 2:16:23 PM Inj Volume : 2 µl  
Acq. Method : C:\CHEM32\2\METHODS\CR\_AJC\_ON.M  
Last changed : 1/23/2015 2:31:26 PM by Steph Yip  
(modified after loading)  
Analysis Method : C:\CHEM32\2\METHODS\CR\_AJC\_ON.M  
Last changed : 1/23/2015 2:22:30 PM by Steph Yip  
(modified after loading)  
Sample Info : OJ-H 94:6 HEX:IPA, 1mL/min.  
chiral alcohol  
-----

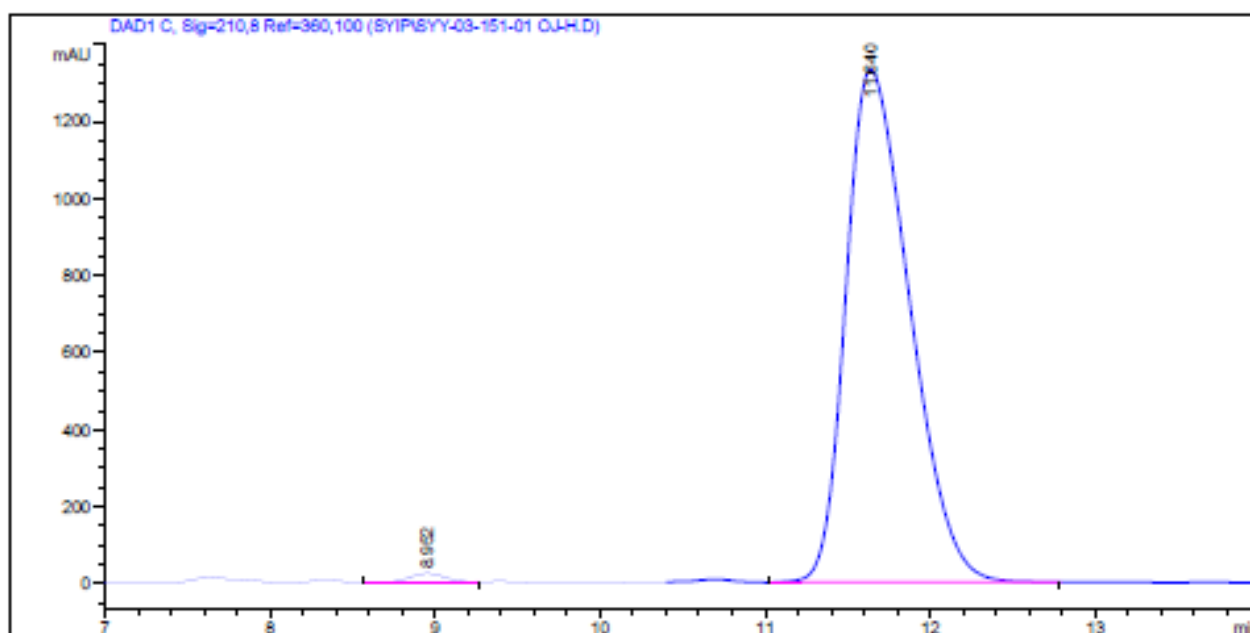

-----  
Area Percent Report  
-----

Sorted By : Signal  
Multiplier : 1.0000  
Dilution : 1.0000  
Use Multiplier & Dilution Factor with ISTDs

Signal 1: DAD1 C, Sig=210,8 Ref=360,100

| Peak # | RetTime [min] | Type | Width [min] | Area [mAU*s] | Height [mAU] | Area %  |
|--------|---------------|------|-------------|--------------|--------------|---------|
| 1      | 8.952         | VV   | 0.2395      | 372.46994    | 23.93700     | 1.0323  |
| 2      | 11.640        | VB   | 0.4187      | 3.57087e4    | 1332.38318   | 98.9677 |

Instrument 2 1/23/2015 2:24:14 PM Steph Yip

Page 1 of 2

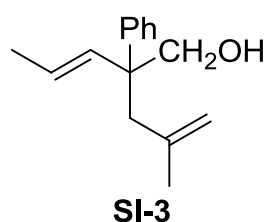

Data File C:\CHEM32\2\DATA\SYIP\SYI-03-151-01 QJ-H.D  
Sample Name: SYI-03-151-01 QJ-H

Totals : 3.60812e4 1356.32018

-----  
\*\*\* End of Report \*\*\*

Instrument 2 1/23/2015 2:24:14 PM Steph Yip

Page 2 of 2

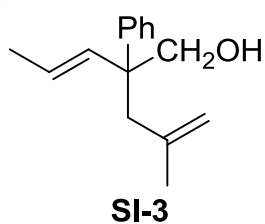

-----  
Acq. Operator : Steph Yip  
Acq. Instrument : Instrument 2 Location : Vial 1  
Injection Date : 1/23/2015 2:25:50 PM Inj Volume : 5 µl  
Acq. Method : C:\CHEM32\2\METHODS\SY CYCLISATION METHOD.M  
Last changed : 1/23/2015 2:50:03 PM by Steph Yip  
(modified after loading)  
Analysis Method : C:\CHEM32\2\METHODS\CR AJC ON.M  
Last changed : 1/23/2015 2:25:57 PM by Steph Yip  
(modified after loading)  
Sample Info : OJ-H 98:2 HEX:IPA, 1mL/min.  
racemic product  
-----

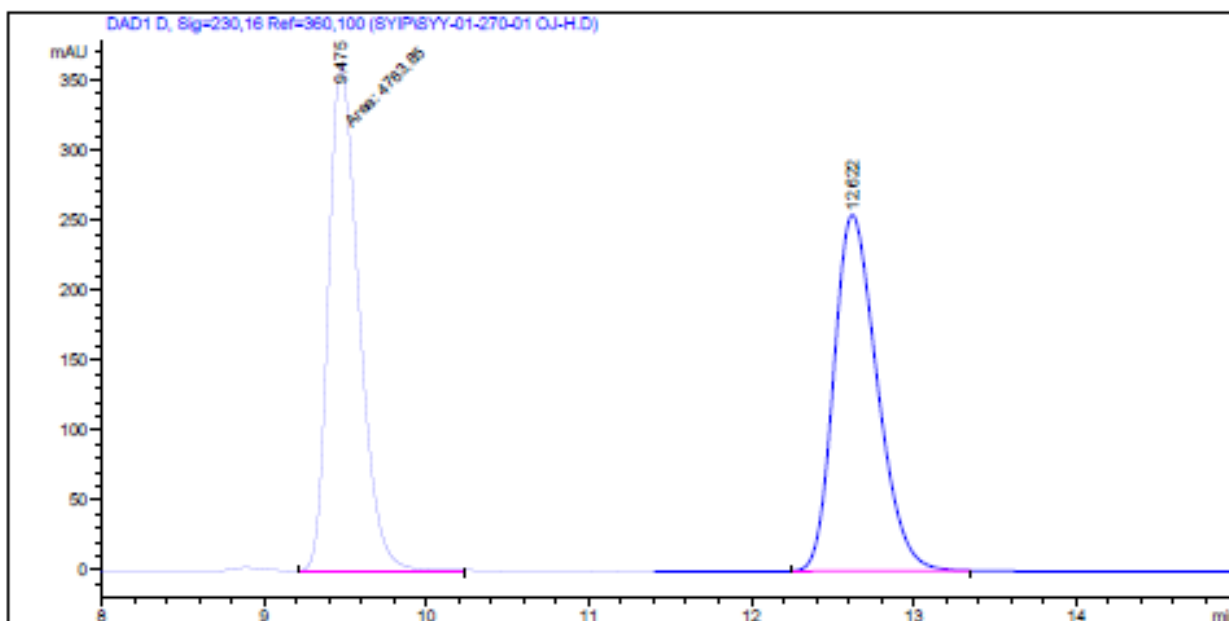

-----  
Area Percent Report  
-----

Sorted By : Signal  
Multiplier : 1.0000  
Dilution : 1.0000  
Use Multiplier & Dilution Factor with ISTDs

Signal 1: DAD1 D, Sig=230,16 Ref=360,100

| Peak # | RetTime [min] | Type | Width [min] | Area [mAU*s] | Height [mAU] | Area %  |
|--------|---------------|------|-------------|--------------|--------------|---------|
| 1      | 9.475         | NM   | 0.2200      | 4763.84961   | 360.94324    | 50.2368 |
| 2      | 12.622        | BB   | 0.2864      | 4718.93506   | 254.45750    | 49.7632 |

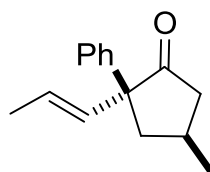

(±)-17

relative configuration only

Data File C:\CHEM32\2\DATA\SYIP\SYI-01-270-01 QJ-H.D  
Sample Name: SYI-01-270-01 QJ-H

Totals : 9482.78467 615.40074

-----  
\*\*\* End of Report \*\*\*

Instrument 2 1/23/2015 2:26:16 PM Steph Yip

Page 2 of 2

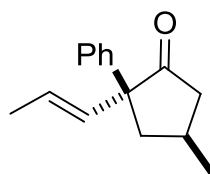

(±)-17

relative configuration only



Data File C:\CHEM32\2\DATA\SYIP\SYIP-03-151-02 OJ-H.D  
Sample Name: SYIP-03-151-02 OJ-H

-----  
Acq. Operator : Steph Yip  
Acq. Instrument : Instrument 2  
Injection Date : 1/23/2015 2:08:29 PM  
Location : Vial 2  
Inj Volume : 5 µl  
Acq. Method : C:\CHEM32\2\METHODS\SYIP CYCLISATION METHOD.M  
Last changed : 1/23/2015 2:02:31 PM by Steph Yip  
(modified after loading)  
Analysis Method : C:\CHEM32\2\METHODS\CR AJC ON.M  
Last changed : 1/23/2015 2:25:57 PM by Steph Yip  
(modified after loading)  
Sample Info : OJ-H 98:2 HEX:IPA, 1mL/min.  
chiral product

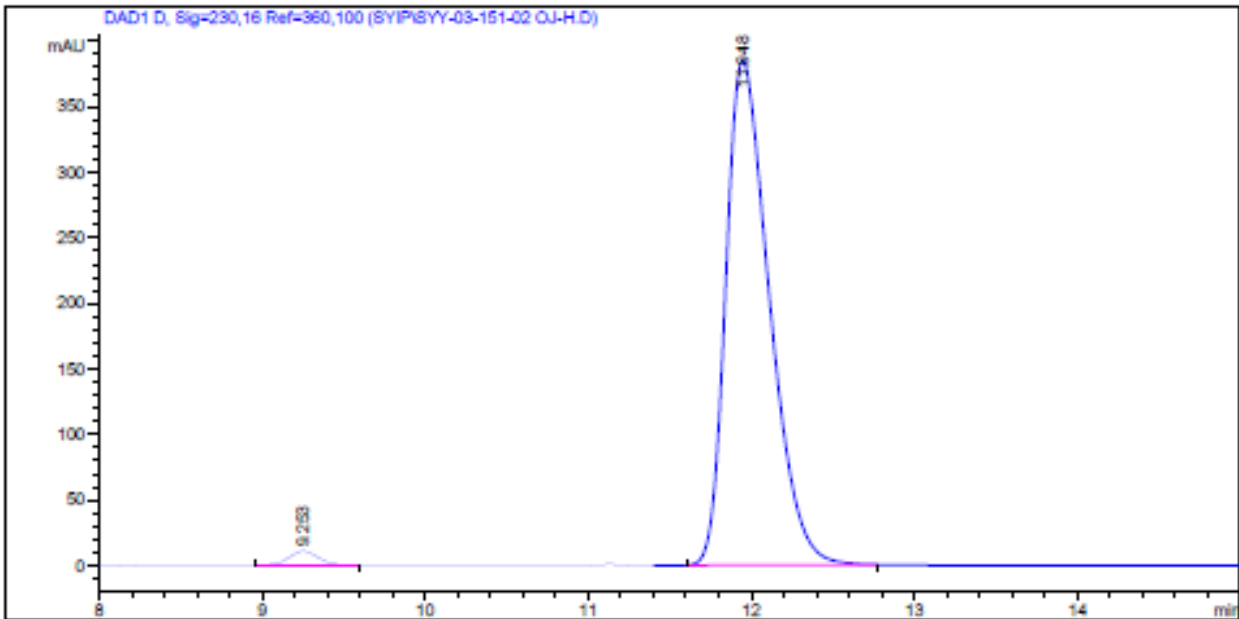

-----  
Area Percent Report  
-----

Sorted By : Signal  
Multiplier : 1.0000  
Dilution : 1.0000  
Use Multiplier & Dilution Factor with ISTDs

Signal 1: DAD1 D, Sig=230,16 Ref=360,100

| Peak # | RetTime [min] | Type | Width [min] | Area [mAU*s] | Height [mAU] | Area %  |
|--------|---------------|------|-------------|--------------|--------------|---------|
| 1      | 9.253         | BB   | 0.1989      | 141.26372    | 10.92173     | 1.9429  |
| 2      | 11.948        | BB   | 0.2842      | 7129.33105   | 384.79364    | 98.0571 |

Instrument 2 1/23/2015 2:28:05 PM Steph Yip

Page 1 of 2

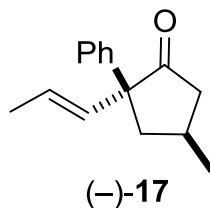

relative configuration only

Data File C:\CHEM32\2\DATA\SYIP\SYI-03-151-02 QJ-H.D  
Sample Name: SYI-03-151-02 QJ-H

Totals : 7270.59477 395.71537

-----  
\*\*\* End of Report \*\*\*

Instrument 2 1/23/2015 2:28:05 PM Steph Yip

Page 2 of 2

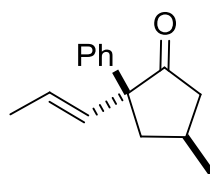

**(-)-17**

relative configuration only

**Table SI-2 Crystal data and structure refinement for (S)-23**

|                        |                                                               |                         |
|------------------------|---------------------------------------------------------------|-------------------------|
| Empirical formula      | C <sub>20</sub> H <sub>20</sub> N <sub>2</sub> O <sub>7</sub> |                         |
| Formula weight         | 400.38                                                        |                         |
| Temperature            | 150 °K                                                        |                         |
| Wavelength             | 1.54178                                                       |                         |
| Bond precision         | C–C = 0.0033 Å                                                |                         |
| Unit cell dimensions   | a = 13.1111(4) Å                                              | α = 90.00°              |
|                        | b = 8.4907(3) Å                                               | β = 105.729°            |
|                        | c = 17.8251(5) Å                                              | γ = 90.00°              |
| Volume                 | 1910.03(10) Å <sup>3</sup>                                    |                         |
| Z                      | 4                                                             |                         |
| Space group            | P 21 (calculated)                                             | P 1 21 1 (reported)     |
| Hall group             | P 2yb                                                         |                         |
| Density                | 1.392 mg/mm <sup>3</sup>                                      |                         |
| Absorption coefficient | 0.897 mm <sup>-1</sup>                                        |                         |
| F(000)                 | 840                                                           |                         |
| F(000')                | 842.95 (calculated)                                           |                         |
| h, k, l max            | 15, 10, 21                                                    |                         |
| Nref                   | 7006 [ 3758] (calculated)                                     | 6959 (reported)         |
| Tmin, Tmax             | 0.798, 0.836 (calculated)                                     | 0.676, 0.753 (reported) |
| Tmin'                  | 0.764 (calculated)                                            |                         |
| R (reflections)        | 0.0318 ( 6686)                                                |                         |
| wR2 (reflections)      | 0.0864 ( 6959)                                                |                         |
| S                      | 1.038                                                         |                         |
| Npar                   | 527                                                           |                         |
| Data completeness      | 1.85/0.99                                                     |                         |
| Theta (max)            | 68.281                                                        |                         |

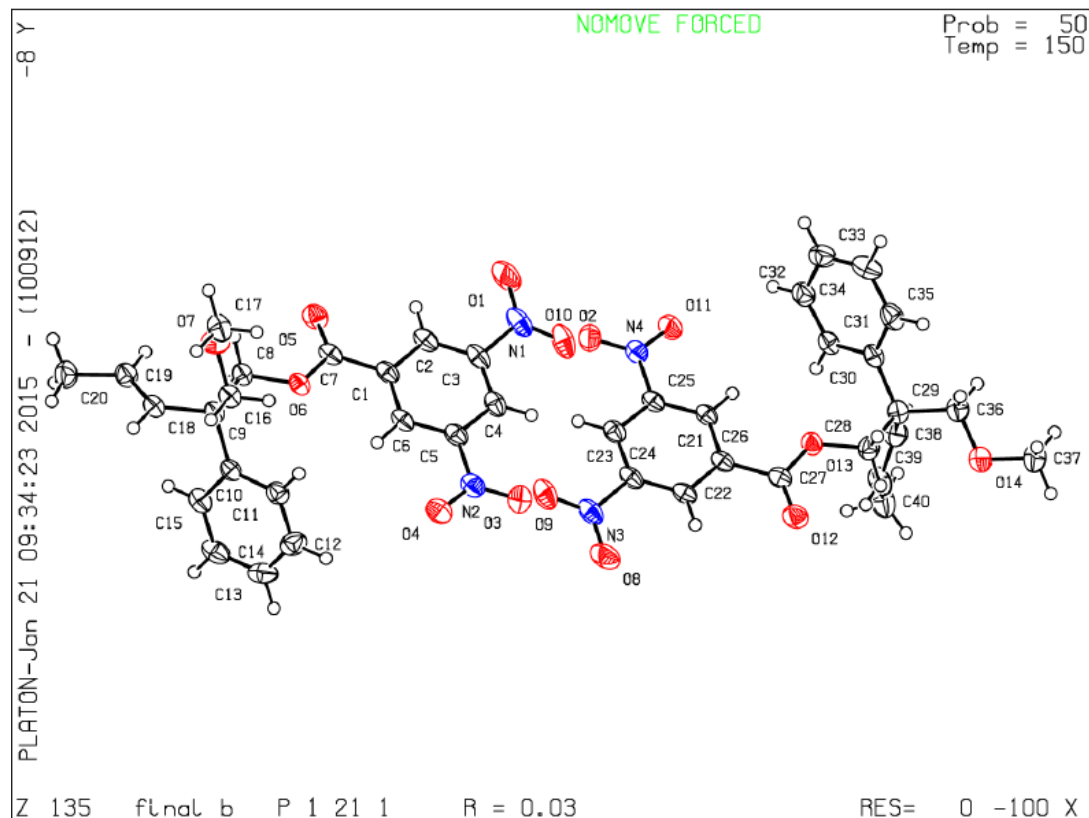

Supplement: anie0054-6870-sd1.pdf [file anie0054-6870-sd1.pdf]
